# Supplementary material for: Boosting ATM activity alleviates aging and extends lifespan in a mouse model of progeria
Source: eLife journal article supplement (doi:10.7554/elife.34836), 2018-05-02
Supplement: supp [file elife-34836-supp-v1.zip]

Archive with 16 entries (16 files):
- elife_poa_e34836_Figure_2_Figure_Supplement_1.pdf
- elife_poa_e34836_Transparent_Reporting_File.docx
- elife_poa_e34836_Figure_2_source_data_2.xlsx
- elife_poa_e34836_Figure_1_figure_supplement_2.pdf
- elife_poa_e34836_Figure_2_source_data_1.xlsx
- elife_poa_e34836_Figure_4_figure_supplement_1.pdf
- elife_poa_e34836_Figure_1_source_data_2.xlsx
- elife_poa_e34836_Figure_3_figure_supplement_1.pdf
- elife_poa_e34836_Figure_1_figure_supplement_1.pdf
- elife_poa_e34836_Figure_5_figure_supplement_1.pdf
- elife_poa_e34836_Figure_5_figure_supplement_2.pdf
- elife_poa_e34836_Figure_5_source_data_1.xlsx
- elife_poa_e34836_Figure_2_source_data_3.xlsx
- elife_poa_e34836_Figure_1_source_data_1.xlsx
- elife_poa_e34836_Figure_5_source_data_2.xlsx
- elife_poa_e34836_Figure_2_figure_supplement_2.pdf
