# Supplementary material for: Boosting ATM activity alleviates aging and extends lifespan in a mouse model of progeria
Source: eLife journal article supplement (doi:10.7554/elife.34836), 2018-05-02
Supplement: supp [file elife-34836-supp-v1.zip › elife_poa_e34836_Figure_1_source_data_1.xlsx]

## Sheet: Sheet1
Percentage of SA-β-Gal positive cells (%)
		#1	#2	#3	#4	#5	Mean±SEM
F2S sh NC	Control	40.1	51.4	48.9	46.5	38.1	45 ± 2.55 N=5
	CQ-treatment	26.5	16.7	22.6	23.8	21.8	22.28 ± 1.606 N=5
	Unpaired t test
	P value					< 0.0001
	P value summary					***
	Are means signif. different (P < 0.05)					Yes
	One- or two-tailed P value?					Two-tailed
	t, df					t=7.539 df=8
	95% confidence interval					15.77 to 29.67
	R squared					0.8766
		#1	#2	#3	#4	#5	Mean±SEM
F2S sh ATM	Control	56.6	76.9	72.2	84.6	72.5	72.56 ± 4.575 N=5
	CQ-treatment	76.9	65.2	73.3	68.8	66.7	70.18 ± 2.165 N=5
	Unpaired t test
	P value					0.6507
	P value summary					ns
	Are means signif. different (P < 0.05)					no
	One- or two-tailed P value?					Two-tailed
	t, df					t=0.4702 df=8
	95% confidence interval					-9.292 to 14.05
	R squared					0.0269
		#1	#2	#3	#4		Mean±SEM
Zmp24-/-MEF	Control	60.3	38.5	62.6	44.3		51.43 ± 5.926 N=5
	CQ-treatment	30.3	28.5	36.7	48.3	20.5	32.86 ± 4.645 N=5
	Unpaired t test
	P value					0.0406
	P value summary					*
	Are means signif. different (P < 0.05)					Yes
	One- or two-tailed P value?					Two-tailed
	t, df					t=2.507 df=7
	95% confidence interval					1.053 to 36.08
	R squared					0.4731
		#1	#2	#3	#4	#5	Mean±SEM
F2S	sh NC	3.96	5.71	7.95	6.52	8.13	6.458 ± 0.7701 N=5
	sh ATM #1	76.4	66.7	52.6	53.8	41.8	58.29 ± 6.018 N=5
	sh ATM #2	47.8	55.6	45.5	61.1	58.8	53.76 ± 3.053 N=5
	Unpaired t test
			sh ATM #1 Vs sh NC				sh ATM #2 Vs sh NC
	P value			< 0.0001			< 0.0001
	P value summary			***			***
	Are means signif. different (P < 0.05)			Yes			Yes
	One- or two-tailed P value?			Two-tailed			Two-tailed
	t, df			t=8.544 df=8			t=15.02 df=8
	95% confidence interval			-65.83 to -37.84			-54.56 to -40.04
	R squared			0.9012			0.9658
		#1	#2	#3	#4	#5	Mean±SEM
MEF	Control	40.3	38.5	42.6	34.3	36.5	38.44 ± 1.443 N=5
	CQ-treatment	30.3	28.5	26.7	21.3	20.6	25.48 ± 1.938 N=5
	Unpaired t test
	P value					0.0007
	P value summary					***
	Are means signif. different (P < 0.05)					Yes
	One- or two-tailed P value?					Two-tailed
	t, df					t=5.363 df=8
	95% confidence interval					7.387 to 18.53
	R squared					0.7824
