# Supplementary material for: Boosting ATM activity alleviates aging and extends lifespan in a mouse model of progeria
Source: eLife journal article supplement (doi:10.7554/elife.34836), 2018-05-02
Supplement: supp [file elife-34836-supp-v1.zip › elife_poa_e34836_Figure_1_source_data_2.xlsx]

## Sheet: Sheet1
Percentage of Edu positive staining cells (%)
		#1	#2	#3	#4	#5	#6	Mean±SEM
F2S	sh NC	33.3	40	30	28	33.3	25	31.61 ± 2.126 N=6
	sh ATM	7.69	19.04	13.33	10.53	8	4	10.43 ± 2.140 N=6
	Unpaired t test
	P value					< 0.0001
	P value summary					***
	Are means signif. different (P < 0.05)					Yes
	One- or two-tailed P value?					Two-tailed
	t, df					t=7.019 df=10
	95% confidence interval					14.46 to 27.9
	R squared					0.8313
		#1	#2	#3	#4			Mean±SEM
F2S	Control	35.9	48.7	25	35.9			36.53 ± 4.864 N=4
	CQ-1	39.5	39.2	33.1	30.96			35.69 ± 2.159 N=4
	CQ-10	25.8	17.1	23.3	26.7			23.23 ± 2.165 N=4
	Control Vs CQ-1
	Unpaired t test
	P value					0.9015
	P value summary					ns
	Are means signif. different (P < 0.05)					no
	One- or two-tailed P value?					Two-tailed
	t, df					t=0.1291 df=6
	95% confidence interval					-12.3 to 13.67
	R squared					0.002772
	Control Vs CQ-10
	Unpaired t test
	P value					0.0479
	P value summary					*
	Are means signif. different (P < 0.05)					Yes
	One- or two-tailed P value?					Two-tailed
	t, df					t=2.478 df=6
	95% confidence interval					0.1637 to 26.14
	R squared					0.5058
