# Supplementary material for: Boosting ATM activity alleviates aging and extends lifespan in a mouse model of progeria
Source: eLife journal article supplement (doi:10.7554/elife.34836), 2018-05-02
Supplement: supp [file elife-34836-supp-v1.zip › elife_poa_e34836_Figure_2_source_data_1.xlsx]

## Sheet: Atm KO Vs WT
Gene symbol	Base meana		log2 Fold Change	Fold Change	p-valueb	FDRc
	Atm KO	WT
Arap2	4.3449	0.0463006	6.49057	89.9198	1.03514e-307	1.49018e-305		a mean of RPKM for all samples，RPKM:Reads Per Kilobases per Millionreads
Gulp1	6.3274	29.2772	-2.2528	0.209816	4.49056e-304	6.39994e-302		b Exact Negative Binomial Test
Dkk3	2.24541	19.5887	-3.16671	0.111359	7.52934e-304	1.06246e-301		c BH adjusted p-values
Foxa2	12.7713	0.0189595	9.23024	600.592	1.44545e-297	2.01966e-295
Lox	115.345	504.345	-2.1711	0.222041	5.46652e-297	7.56397e-295
Klhl22	24.7637	2.73235	3.13605	8.79114	2.70354e-293	3.70489e-291
Pmp22	26.411	98.4128	-1.94061	0.260506	3.94008e-290	5.34801e-288
Ahcy	1.2449	17.419	-3.84795	0.0694465	5.72552e-289	7.69813e-287
Wnt10b	9.24887	41.3591	-2.20338	0.217129	5.09162e-287	6.78185e-285
Acsl4	51.2864	12.0898	2.04198	4.1181	1.20429e-286	1.58922e-284
Cspg4	3.35851	15.218	-2.22274	0.214234	5.35111e-286	6.9967e-284
Pcsk6	13.3782	0.543583	4.57734	23.8736	7.80408e-286	1.01112e-283
Gnao1	0.866853	9.16515	-3.44332	0.0919302	4.81645e-283	6.18415e-281
Il22ra1	4.1241	0.00696527	9.05219	530.862	9.96323e-282	1.26782e-279
Slit3	11.1117	36.5539	-1.76066	0.295114	1.01446e-277	1.27948e-275
Tes	70.0213	14.2021	2.25835	4.78443	1.76286e-275	2.20388e-273
Adh7	1.05824	24.4052	-4.56804	0.0421582	4.26915e-275	5.29078e-273
Serpinb6b	14.667	0.233385	5.92372	60.7039	1.65201e-274	2.0297e-272
Crb2	4.34156	0.0478109	6.45828	87.9298	6.4611e-273	7.87039e-271
Rbp1	14.1389	0.158605	6.43658	86.6171	2.57898e-270	3.11489e-268
Cd55	11.5711	0.15417	6.1651	71.7594	1.56229e-269	1.87107e-267
Tinagl1	49.6579	11.247	2.09931	4.28504	5.99606e-266	7.12132e-264
Ptprm	4.531	17.6179	-2.00163	0.249719	1.68623e-265	1.98613e-263
Fmnl1	11.7448	0.574381	4.3059	19.779	6.53846e-261	7.6382e-259
Fst	37.3517	3.74748	3.27313	9.6674	4.06774e-260	4.71329e-258
Itgb5	29.5882	81.9222	-1.51203	0.350618	2.30551e-259	2.64984e-257
Slc22a23	4.20646	0.110984	5.19423	36.6117	1.99508e-256	2.27471e-254
Dtna	19.5742	1.00737	4.23499	18.8304	1.67378e-255	1.89323e-253
Egfr	39.9694	7.50574	2.3691	5.16618	3.758e-255	4.21725e-253
Ntn1	7.31913	26.5589	-1.90241	0.267496	7.32121e-255	8.15171e-253
Map2	15.6517	54.5238	-1.84338	0.278668	1.30384e-253	1.44049e-251
Dock10	2.78113	0.00815248	8.27094	308.889	1.38633e-251	1.51984e-249
Slc9a3r1	69.4329	16.9384	1.99251	3.9793	7.228e-250	7.86362e-248
Pde8a	4.70499	26.0225	-2.50961	0.175603	2.17739e-249	2.35092e-247
Chn2	6.74905	0.0256884	7.93839	245.297	9.54387e-249	1.0227e-246
Atp10d	7.01123	0.608839	3.48078	11.164	3.33758e-248	3.54979e-246
Col1a1	328.906	1129.97	-1.82338	0.282558	3.19163e-247	3.36942e-245
Ccl7	71.6068	220.689	-1.66663	0.314989	6.96943e-247	7.30356e-245
Cyp1b1	129.842	24.5923	2.35779	5.12586	1.81698e-246	1.89019e-244
Atp1b1	36.489	8.0947	2.12979	4.37653	1.04391e-244	1.0781e-242
S100a4	774.738	1988.73	-1.40298	0.378147	6.01579e-244	6.16814e-242
Rspo2	0.979213	16.3089	-4.09802	0.0583946	1.75432e-243	1.7859e-241
Ifit3	1.15517	20.3361	-4.17706	0.0552816	3.07572e-243	3.10888e-241
Gas2	2.68322	23.9366	-3.19872	0.108915	5.04571e-243	5.06418e-241
Fig4	10.0337	41.3947	-2.08721	0.235335	4.30899e-241	4.29453e-239
Itga2	6.24498	0.0884508	6.08894	68.0695	1.53711e-240	1.52131e-238
Ebf1	1.0073	9.86902	-3.33528	0.0990788	3.20705e-240	3.1522e-238
2310022B05Rik	46.7664	118.973	-1.38988	0.381596	5.45697e-240	5.3269e-238
Bend4	6.39733	0.623632	3.3154	9.95487	5.46151e-239	5.29507e-237
Adamts5	3.23606	12.7444	-2.02019	0.246525	6.54162e-237	6.29941e-235
Ddx4	8.46652	0.0433759	7.51743	183.219	9.4323e-237	9.02209e-235
Gng2	1.08213	13.2093	-3.65015	0.0796517	7.13653e-236	6.78066e-234
Atf5	35.3964	101.723	-1.56587	0.337773	2.11006e-235	1.99156e-233
Mical1	3.21992	16.5431	-2.40398	0.188942	1.4623e-234	1.3711e-232
Fhl1	40.92	188.669	-2.24783	0.21054	2.53459e-229	2.36098e-227
Nynrin	1.57174	9.72722	-2.67185	0.156925	6.58185e-229	6.09121e-227
Foxg1	17.1124	0.497503	5.06434	33.4594	1.63796e-227	1.50607e-225
Cxcl12	66.4571	11.4251	2.49753	5.6472	2.68633e-227	2.4542e-225
L1cam	0.239001	5.99032	-4.68338	0.0389192	1.62563e-226	1.4757e-224
Pfn2	26.381	3.87101	2.72538	6.61333	1.39064e-223	1.25439e-221
Dclk1	9.17732	28.3187	-1.66829	0.314626	2.13787e-222	1.91629e-220
Sh3bgrl2	7.99415	0.273368	4.82433	28.3313	2.74487e-221	2.445e-219
Gcnt1	8.22002	0.234243	5.08148	33.8593	5.16202e-221	4.56951e-219
D17H6S56E-5	34.3303	88.2439	-1.40487	0.377653	1.97004e-219	1.73315e-217
Slc12a7	18.1847	4.41848	1.99861	3.99613	6.2952e-219	5.50424e-217
Peg3	10.8073	1.10317	3.24873	9.50528	5.38808e-218	4.68237e-216
Tmem119	8.24042	48.6681	-2.60483	0.164387	6.31674e-217	5.45613e-215
Nid2	0.797139	12.3798	-3.99717	0.0626228	1.21773e-216	1.04549e-214
Plce1	12.351	1.42816	3.06857	8.38943	6.49813e-216	5.54559e-214
Sall1	0.122002	4.74764	-5.32197	0.0249993	8.51657e-216	7.22489e-214
Gata6	9.4893	0.605086	3.92729	15.2136	1.31649e-215	1.11022e-213
Loxl2	21.3613	6.19682	1.7424	3.3459	2.26189e-215	1.89626e-213
Alx4	0.0773841	4.86999	-5.99637	0.0156644	8.80195e-215	7.33599e-213
Ddx3y	14.7086	1.05332	3.76128	13.5599	2.72114e-214	2.25475e-212
Zfp518b	8.89109	1.15277	2.90253	7.47734	1.5138e-211	1.24709e-209
Hmha1	8.35264	0.15349	5.71639	52.5781	2.34633e-210	1.92183e-208
Ddit4	7.97262	34.6737	-2.16335	0.223237	1.8826e-209	1.53319e-207
Errfi1	43.1334	8.0034	2.38708	5.23098	7.02933e-209	5.69216e-207
Sema3e	5.61544	0.48668	3.48477	11.1949	4.0288e-206	3.24398e-204
Cd109	9.51757	44.7755	-2.27686	0.206347	8.5626e-205	6.85586e-203
Ogdhl	7.41965	0.387708	4.21206	18.5335	1.40997e-204	1.12262e-202
Lif	12.3959	1.43169	3.07116	8.4045	4.00628e-203	3.17209e-201
Lrrc15	0.233299	4.95833	-4.44973	0.0457611	1.53336e-202	1.20737e-200
Naalad2	0.014904	5.64135	-8.46074	0.00283833	3.3946e-202	2.65823e-200
Igsf8	35.9812	9.82208	1.83014	3.55572	4.44108e-202	3.4587e-200
Arhgef25	23.599	64.258	-1.48792	0.356525	1.37281e-200	1.06333e-198
Slc16a2	17.1003	3.96043	2.06686	4.18973	2.48038e-199	1.91083e-197
2610008E11Rik	2.87708	16.3291	-2.54695	0.171116	2.60047e-198	1.99258e-196
Hoxb13	0.0460092	14.287	-8.22372	0.00334515	3.93606e-198	2.99983e-196
Cgn	9.56291	1.05151	3.14065	8.81922	6.86864e-196	5.20701e-194
Cck	163.791	8.77533	4.17793	18.1002	1.30001e-195	9.80305e-194
Sh2d5	8.27525	0.199691	5.32923	40.203	4.00394e-193	3.00338e-191
Rab27b	8.38525	1.0592	2.94068	7.67772	9.31694e-193	6.9521e-191
Akap5	3.84459	0.2257	4.04505	16.5075	1.76728e-192	1.31183e-190
Dab2	30.987	76.5741	-1.3481	0.392808	4.25826e-192	3.14449e-190
Cd97	4.27953	21.1297	-2.34576	0.196723	5.84551e-192	4.29434e-190
Atp8b4	0.269579	4.98021	-4.24683	0.0526717	2.19068e-191	1.6011e-189
Scrn1	19.0455	2.25825	3.03274	8.1836	1.70172e-190	1.2374e-188
Gpm6a	5.4173	0.0677406	6.25178	76.2031	2.10426e-190	1.52233e-188
Grb10	56.3805	129.448	-1.24198	0.422793	2.98004e-190	2.14503e-188
Bai2	3.46349	0.0447624	6.20956	74.0053	1.37016e-187	9.81281e-186
Crip2	19.8009	68.533	-1.83393	0.2805	2.27669e-187	1.62237e-185
Nfatc4	3.27144	17.9594	-2.49916	0.17688	8.76916e-187	6.21782e-185
Cxcl16	9.77165	0.579438	4.03048	16.3417	1.6837e-186	1.18793e-184
Col6a2	29.3131	138.962	-2.28767	0.204806	2.36803e-186	1.66252e-184
Plxna4	1.75776	0.0319583	5.72628	52.9398	3.89834e-185	2.72349e-183
Cited2	60.6223	146.179	-1.31263	0.402587	5.69829e-185	3.96156e-183
Col4a6	2.75877	0.0847764	4.97386	31.4254	7.9062e-184	5.46986e-182
Ptx3	26.7495	156.912	-2.59509	0.1655	2.70585e-183	1.86299e-181
Etv4	42.3539	11.0347	1.89704	3.72449	6.57127e-183	4.50258e-181
Slpi	35.3172	3.18579	3.42483	10.7393	8.71256e-183	5.94121e-181
Cadm1	7.93996	0.137623	5.79116	55.375	2.61946e-181	1.77774e-179
Rb1cc1	9.52664	31.0969	-1.74952	0.297401	2.82367e-181	1.90725e-179
Sparc	319.377	678.998	-1.13101	0.456595	9.88328e-181	6.64417e-179
C1qtnf3	0.419118	10.0271	-4.62018	0.0406619	5.39136e-180	3.6074e-178
Enc1	35.0435	13.3139	1.35334	2.55502	7.39456e-180	4.92464e-178
Bgn	374.148	804.045	-1.14649	0.451723	7.22018e-179	4.78614e-177
Klra18	12.7491	0.105274	6.82458	113.346	2.19836e-178	1.45051e-176
Kif21b	0.255614	3.33888	-3.7475	0.0744544	1.53608e-176	1.00886e-174
Btg3	81.6461	24.9007	1.67019	3.18257	3.26114e-176	2.13201e-174
Isl1	4.94767	0.00407643	9.78239	880.627	6.98751e-176	4.5473e-174
Exoc3	9.25334	26.7969	-1.57675	0.335237	1.84205e-175	1.19331e-173
Samd5	8.11989	0.182738	5.42939	43.0933	2.37127e-175	1.5292e-173
Cmah	7.65897	1.10231	2.75353	6.74366	3.61323e-175	2.31963e-173
Ldhb	39.9897	3.97494	3.28772	9.76566	5.19312e-175	3.31894e-173
Vnn1	9.4771	0.181534	5.64144	49.9162	2.7493e-174	1.74924e-172
Slc8a1	0.826447	0.0194633	5.35204	40.8435	7.46821e-171	4.73053e-169
Col8a1	12.4527	36.747	-1.60382	0.329005	4.89225e-170	3.08515e-168
Adm	8.92758	38.9068	-2.16629	0.222782	7.95163e-170	4.99236e-168
Adamtsl5	8.08616	23.829	-1.60202	0.329415	1.54732e-169	9.67209e-168
Ctsk	0.461103	13.4363	-4.90056	0.0334798	4.54773e-169	2.83032e-167
Il6st	35.4034	85.1197	-1.30837	0.403777	6.46e-168	4.00295e-166
Rasa3	19.6624	45.5567	-1.25503	0.418985	1.6638e-167	1.02651e-165
Htra1	45.8314	8.91529	2.31926	4.99078	7.7136e-167	4.73855e-165
Mmp14	52.8536	157.787	-1.6205	0.325222	2.30538e-166	1.41014e-164
Cd24a	70.6759	218.097	-1.66872	0.314533	8.83768e-166	5.38268e-164
Gata4	12.0722	1.67596	2.80456	6.98647	2.442e-165	1.48099e-163
Cdh11	23.9434	60.2984	-1.37529	0.385475	6.63191e-165	4.005e-163
Glo1	142.762	312.281	-1.17204	0.443792	6.44372e-164	3.87493e-162
Efnb2	36.2973	13.182	1.41855	2.67317	6.51691e-164	3.90248e-162
Slc38a1	44.0985	15.9411	1.4251	2.68533	1.63137e-163	9.72815e-162
Pdgfrl	10.342	39.1459	-1.96261	0.256564	1.9652e-163	1.167e-161
Nfix	30.1916	62.9671	-1.1033	0.465452	2.0625e-163	1.2197e-161
Eif2s3y	28.2618	1.09907	4.64118	24.9537	2.07881e-163	1.22426e-161
Prss57	0.81063	11.5668	-3.87671	0.0680762	4.2269e-163	2.47909e-161
Hivep2	4.49877	11.5777	-1.4066	0.377199	9.6979e-162	5.66453e-160
Gpm6b	8.47573	0.774639	3.40682	10.6061	2.73292e-161	1.58978e-159
Hbegf	46.5187	13.1302	1.78184	3.43864	4.34411e-161	2.51676e-159
Car12	5.76511	0.242537	4.51855	22.9202	1.79931e-160	1.03821e-158
Olr1	4.15416	0.0282704	7.10933	138.077	8.31821e-160	4.78029e-158
Emilin1	16.547	44.7848	-1.47919	0.35869	1.13357e-159	6.48821e-158
F11r	24.7219	4.07406	2.5591	5.89341	1.03476e-158	5.89897e-157
Bcl11b	0.0104888	1.70017	-7.31263	0.00629041	1.90566e-158	1.08205e-156
Sytl2	2.61086	14.463	-2.51193	0.175321	2.85594e-158	1.6152e-156
Orai2	16.8137	2.81414	2.53471	5.7946	4.93831e-157	2.78185e-155
Jak1	28.1924	61.2706	-1.16268	0.446682	1.28921e-156	7.23379e-155
Cyp2s1	6.31257	0.0765399	6.2942	78.4772	6.46156e-156	3.61138e-154
Tbx5	2.73552	0	11.4549	2807.1	7.31784e-156	4.07398e-154
Pdlim2	21.3283	58.5327	-1.49909	0.353776	7.58787e-156	4.20787e-154
Ugcg	24.1749	61.622	-1.39278	0.38083	3.07692e-155	1.6997e-153
Npy1r	10.3888	1.49994	2.7477	6.71645	1.39201e-154	7.65982e-153
Cst3	317.818	754.547	-1.29032	0.408859	8.67837e-154	4.75708e-152
Fryl	7.83016	17.9471	-1.23943	0.42354	1.01624e-153	5.54923e-152
Adamtsl3	0.980378	5.88361	-2.628	0.161768	9.3088e-153	5.0637e-151
Clip4	12.6185	1.74035	2.81322	7.02851	1.23598e-152	6.6978e-151
Adamts12	0.175399	3.30361	-4.272	0.0517605	1.71847e-151	9.27711e-150
Rtn4rl1	0.196225	4.60234	-4.5869	0.0416107	2.3776e-151	1.27534e-149
Sprr1a	14.0608	0.025002	8.82235	452.68	2.3803e-151	1.27534e-149
Barx1	8.61006	0	11.5753	3051.39	3.55317e-151	1.89662e-149
Dse	14.4198	35.554	-1.34471	0.393732	5.07199e-151	2.69724e-149
Soat1	37.0758	14.5466	1.30685	2.47401	1.24816e-150	6.61293e-149
Matn2	3.11519	14.2341	-2.23388	0.212587	1.47275e-150	7.77393e-149
Rab3b	4.2373	0.103349	5.30475	39.5265	4.06325e-150	2.13688e-148
Col5a1	36.2452	90.384	-1.36131	0.389229	5.65939e-150	2.96535e-148
Ttc28	2.57732	8.7931	-1.81328	0.284543	7.68648e-150	4.01273e-148
Synm	0.236863	2.68434	-3.54151	0.0858814	3.47597e-149	1.80801e-147
Sema6d	2.88213	0.0321615	6.41421	85.2842	3.6278e-147	1.88012e-145
Aqp1	10.7494	62.4997	-2.58262	0.166938	4.27559e-147	2.20782e-145
Hmcn1	0.0813221	1.04489	-3.72225	0.0757687	4.54638e-147	2.33917e-145
Clec14a	0.0176655	2.65712	-7.19332	0.00683275	5.39196e-147	2.76425e-145
Gsdmd	23.0691	3.23405	2.7916	6.92399	2.23901e-146	1.14374e-144
Col6a1	52.6942	193.001	-1.91561	0.26506	2.42568e-146	1.23467e-144
H2-T10	8.80713	36.0881	-2.07729	0.23696	6.34876e-146	3.22002e-144
Eps8l2	7.58831	0.564123	3.70407	13.0328	1.0716e-145	5.41578e-144
Fam198b	8.81367	35.6429	-2.0585	0.240065	2.01792e-145	1.01623e-143
Pik3r5	7.25947	0.931763	2.91667	7.551	2.3844e-145	1.19657e-143
Cystm1	37.0656	2.78829	3.6871	12.8803	3.20994e-145	1.6052e-143
Alcam	14.0672	2.73445	2.32007	4.99357	1.46948e-144	7.32276e-143
Notch1	0.830373	5.09834	-2.65993	0.158227	3.80639e-144	1.8902e-142
Plagl1	0.988733	8.88277	-3.2084	0.108187	5.28683e-144	2.61625e-142
Alx1	4.31984	0.0162747	7.89487	238.009	2.61522e-143	1.28969e-141
Fam73a	3.91554	0.302048	3.65122	12.564	7.32703e-143	3.60086e-141
Plxnb1	2.36732	0.164666	3.79847	13.914	9.5757e-143	4.68979e-141
Calr	468.474	908.047	-0.997713	0.500793	1.02805e-142	5.01773e-141
Flt4	7.15657	1.26275	2.45978	5.50134	2.22204e-142	1.08084e-140
Ctnnd2	0.107071	2.88543	-4.78295	0.0363235	7.88217e-142	3.82097e-140
Pls3	155.367	71.5668	1.0755	2.10746	4.75306e-141	2.29629e-139
Fbn1	22.3863	50.332	-1.21157	0.431799	7.0037e-141	3.37219e-139
Slc39a10	33.3197	9.16992	1.81817	3.52633	1.61022e-140	7.72689e-139
Dpt	0.0367923	6.01245	-7.29282	0.00637739	3.0339e-140	1.45098e-138
Ermp1	16.485	37.4269	-1.22567	0.427598	3.2054e-140	1.52787e-138
Ptgs2	94.6712	33.0464	1.47557	2.78094	7.75226e-140	3.68284e-138
Ern1	13.016	3.04938	2.05005	4.1412	2.4969e-139	1.18225e-137
Lsr	9.01297	0.28641	4.92503	30.3795	2.64286e-139	1.24722e-137
Ndrg1	18.669	51.7015	-1.51246	0.350514	3.31162e-139	1.55766e-137
C1qtnf6	5.49935	25.9081	-2.27823	0.206151	1.93914e-137	9.09098e-136
Mc5r	0.0690986	8.98503	-6.98529	0.00789258	2.24392e-137	1.04853e-135
Kank1	6.15171	0.649973	3.19815	9.17781	2.9701e-137	1.38333e-135
Parvb	3.73055	14.0112	-1.95154	0.25854	8.90306e-137	4.13311e-135
Igf2os	1.9637	0	11.2546	2443.2	3.83172e-136	1.77304e-134
Akr1b3	170.88	69.0109	1.26528	2.40373	4.34471e-136	2.00391e-134
Gvin1	3.92298	0.161469	4.55167	23.4524	4.62031e-136	2.12415e-134
Gjb3	16.6639	1.35023	3.57717	11.9353	6.27681e-136	2.87644e-134
Angpt1	2.73611	14.627	-2.46025	0.181715	1.86972e-135	8.54078e-134
Trib3	4.70723	24.2859	-2.40977	0.188186	2.95085e-135	1.34363e-133
Micall2	9.49296	24.992	-1.43912	0.368793	2.99554e-135	1.35963e-133
Tgfb3	19.5176	53.1147	-1.48721	0.356703	1.13015e-134	5.11329e-133
Mpzl2	3.47277	0.0567613	5.87542	58.7055	1.15378e-134	5.2037e-133
Hhip	2.84658	0.127723	4.4342	21.6186	2.57782e-134	1.15896e-132
Crabp2	45.6681	4.64454	3.25303	9.53368	7.42271e-134	3.32668e-132
Cyp26b1	0.704979	5.229	-2.93337	0.130908	1.2954e-133	5.78748e-132
Cd276	10.4248	28.7998	-1.50858	0.351458	2.77134e-133	1.23428e-131
St3gal2	21.9633	49.5984	-1.21812	0.429842	3.84806e-133	1.70849e-131
Npnt	16.1226	2.73041	2.51872	5.73072	5.26846e-133	2.33187e-131
Tmc6	18.0169	1.5518	3.48946	11.2314	8.26862e-133	3.64843e-131
Slc48a1	35.7983	97.275	-1.48494	0.357262	1.90399e-132	8.3752e-131
Epha4	1.64482	0.0110936	7.0921	136.438	4.19075e-131	1.83774e-129
Hoxc13	4.70656	19.191	-2.07004	0.238153	1.38026e-130	6.03421e-129
Ucp2	81.9969	26.9039	1.56489	2.95855	1.41997e-130	6.18882e-129
Oxr1	31.2388	62.4266	-1.04164	0.485773	5.5997e-130	2.43314e-128
Serpinb9	18.611	3.47206	2.37842	5.19965	1.04554e-129	4.52918e-128
Cercam	1.75746	10.82	-2.66363	0.157822	1.10344e-129	4.76551e-128
Syt12	6.11445	0.271888	4.45021	21.8599	2.38781e-129	1.02813e-127
Lmod1	0.395311	7.83682	-4.3523	0.0489585	8.06837e-129	3.46357e-127
Crip1	12.6492	88.3475	-2.84672	0.139012	1.33549e-128	5.71575e-127
Gypc	15.1859	40.2453	-1.44874	0.366341	1.44481e-128	6.16509e-127
Dkk2	2.58722	11.5924	-2.20585	0.216757	1.99676e-128	8.49489e-127
Sema3a	28.0177	11.8215	1.20201	2.30059	2.34267e-128	9.93683e-127
Smpd3	10.2534	1.368	2.86339	7.27725	3.05907e-128	1.2937e-126
Pvrl2	36.2596	11.7169	1.5866	3.0034	4.14468e-128	1.74763e-126
Hspa1b	16.7784	40.3222	-1.30774	0.403954	9.79928e-128	4.11975e-126
Ddit3	29.313	98.777	-1.79537	0.288098	1.4026e-127	5.87937e-126
Gsto1	205.897	91.0096	1.13492	2.19607	4.09931e-127	1.7133e-125
Antxr2	38.8189	15.8295	1.25118	2.38036	3.36937e-126	1.4041e-124
Msrb3	22.6394	49.3257	-1.16641	0.445529	5.96052e-126	2.47666e-124
Prickle1	0.590372	4.79994	-3.0637	0.119601	8.63635e-126	3.57806e-124
Fam184a	2.35782	0	11.2441	2425.49	1.21432e-125	5.01638e-124
Arhgef5	15.5355	4.94533	1.60877	3.04991	2.27288e-125	9.36217e-124
Anxa8	117.409	43.6922	1.38315	2.60837	5.2443e-125	2.15394e-123
Fyn	7.568	23.7909	-1.6954	0.308768	8.92247e-125	3.65003e-123
Shroom2	5.61293	1.14348	2.25248	4.76503	8.93811e-125	3.65003e-123
Hspa1a	1.42343	9.446	-2.7718	0.146422	1.20939e-124	4.92462e-123
Hs3st1	10.2205	0.0830542	6.85578	115.824	5.6053e-124	2.27597e-122
Slc14a1	5.08675	0.0902048	5.75475	53.9947	2.05991e-123	8.34029e-122
Ctla2a	22.7301	1.66738	3.72347	13.2092	1.02238e-122	4.12774e-121
Npy4r	6.31732	0.0104985	8.93643	489.928	2.8379e-122	1.14253e-120
Fam20a	2.49714	16.1171	-2.73234	0.150482	3.74479e-122	1.5034e-120
Thsd7a	3.30307	0.5459	2.55511	5.87713	1.56617e-121	6.26995e-120
Esyt1	16.5735	38.3887	-1.25456	0.419121	3.27922e-121	1.30912e-119
Pdlim5	44.9373	20.1913	1.11138	2.16052	6.82936e-121	2.71877e-119
Aif1l	48.3721	18.8082	1.31994	2.49656	1.4597e-120	5.79489e-119
Prss23	21.7066	62.7462	-1.57422	0.335826	1.80673e-120	7.15264e-119
Rgs16	23.4353	5.36095	2.08525	4.24349	1.97681e-120	7.80429e-119
Mtss1l	5.77025	19.7404	-1.817	0.283811	5.56187e-120	2.18972e-118
Col4a1	61.1365	134.55	-1.18078	0.441112	6.44421e-120	2.53011e-118
Cthrc1	11.8388	0.261199	5.45245	43.7874	1.02628e-119	4.01827e-118
Upp1	9.74725	0.370066	4.67184	25.4897	3.58961e-119	1.40162e-117
Hgf	3.33552	0.0211209	7.16038	143.05	4.62191e-119	1.79977e-117
Acsl6	5.05748	0.166417	4.86679	29.1777	7.17724e-119	2.78719e-117
Mboat1	21.2654	7.08093	1.54312	2.91425	9.95849e-119	3.85675e-117
Adamts6	2.12156	7.74701	-1.91094	0.265919	4.22852e-118	1.6332e-116
Gstm1	36.0865	92.7277	-1.40436	0.377786	8.15847e-118	3.14255e-116
Angptl2	32.1685	79.9836	-1.35692	0.390416	8.65817e-118	3.32604e-116
Sgms1	19.7856	5.73665	1.74356	3.34859	5.28264e-117	2.02387e-115
Zbtb16	0.00395177	1.47803	-8.33558	0.00309558	6.24112e-117	2.38468e-115
Car5b	2.42853	12.2468	-2.37605	0.192637	8.27057e-117	3.15166e-115
Lbp	6.33856	0.360849	4.08237	16.9401	1.26903e-116	4.82301e-115
Polr1a	53.0357	25.3512	1.02211	2.03089	1.61604e-116	6.12549e-115
Sox2	8.1055	0.136839	5.84492	57.4772	3.13538e-116	1.18529e-114
Sema3f	6.7218	23.279	-1.83446	0.280397	6.91496e-116	2.60719e-114
Gadd45b	26.9948	88.3593	-1.7536	0.29656	7.61324e-116	2.8629e-114
Lgr5	0.546423	4.40053	-3.05032	0.120715	8.00109e-116	3.00083e-114
Fndc3c1	1.98048	0.0228214	6.33992	81.0038	1.32904e-115	4.9715e-114
Lipg	2.01975	10.2076	-2.37927	0.192206	1.48025e-115	5.52265e-114
Serpinh1	244.819	470.24	-0.984641	0.505352	2.00321e-115	7.45426e-114
Gm20554	0.0297647	1.81527	-5.93513	0.0163436	3.47436e-115	1.28949e-113
Tgoln2	4.09587	0.0133517	8.03645	262.55	3.5074e-115	1.29838e-113
Shmt1	46.7878	18.474	1.29767	2.45832	4.95578e-115	1.82979e-113
Rasgef1b	5.40502	0.0774507	6.06273	66.8442	6.97116e-115	2.56726e-113
Ccdc80	13.7956	60.9046	-2.18532	0.219864	7.39919e-115	2.71787e-113
Zc3h12a	3.20456	13.4779	-2.11525	0.230805	2.01563e-114	7.38477e-113
Pltp	11.0284	32.856	-1.61751	0.325898	2.6149e-114	9.55578e-113
Il13ra1	13.8895	1.87611	2.84389	7.17953	2.85492e-114	1.04062e-112
Ctdsp2	42.1171	94.5582	-1.20954	0.432408	7.88855e-114	2.86805e-112
Tmem151a	6.572	0.432593	3.87844	14.7071	9.88043e-114	3.5831e-112
Ace	3.05384	0.0631497	5.52908	46.1763	1.41693e-113	5.12539e-112
Pcdh9	1.27124	0.00336011	8.31054	317.484	1.5544e-113	5.60842e-112
Dpysl5	1.85655	0.031819	5.78245	55.0416	2.15446e-113	7.75389e-112
P2rx7	20.638	0.683509	4.86338	29.1087	2.78069e-113	9.98245e-112
Lama1	1.43368	0.0224329	5.9451	61.6103	8.08183e-113	2.89402e-111
Pisd-ps3	19.5358	41.0494	-1.114	0.462011	1.55218e-112	5.5443e-111
Mboat2	3.23282	0.0610367	5.65383	50.347	1.70317e-112	6.0684e-111
Ctsc	4.53263	0.142312	4.93569	30.6049	2.53872e-112	9.0229e-111
Abi3bp	0.302929	4.02974	-3.77331	0.0731341	4.03097e-112	1.42909e-110
Setbp1	2.23697	6.75582	-1.63733	0.321451	5.99795e-112	2.12116e-110
Rab32	18.4005	53.6425	-1.58631	0.333023	1.53072e-111	5.39994e-110
Top2b	32.6808	59.5228	-0.907854	0.532977	1.75044e-111	6.15983e-110
Esrp2	4.25692	0.22611	4.18576	18.1986	2.03917e-111	7.15819e-110
Fhod3	2.35177	0.206378	3.46438	11.0378	2.81091e-111	9.84301e-110
Etl4	3.29147	0.241665	3.72353	13.2097	6.63193e-111	2.31663e-109
Plaur	90.5039	36.7905	1.25566	2.38776	7.05091e-111	2.45696e-109
Akr1b8	88.4916	23.275	1.88374	3.69032	1.49201e-110	5.18637e-109
Herpud1	22.015	49.6769	-1.21698	0.430181	1.54378e-110	5.35328e-109
Ggta1	8.66064	23.1997	-1.46437	0.362394	2.03338e-110	7.03393e-109
Rora	0.711724	10.6616	-3.94108	0.0651056	1.64615e-109	5.6806e-108
Tbx3	8.69647	1.47629	2.51449	5.71396	6.26294e-109	2.15602e-107
Shroom3	6.4612	1.39367	2.16935	4.49821	9.91767e-109	3.40594e-107
Tmem171	12.49	0.711156	4.08191	16.9346	5.1042e-108	1.74868e-106
Igfbp5	1.47708	6.26116	-2.12543	0.229182	5.46016e-108	1.86615e-106
Dysf	4.24417	0.887608	2.21447	4.64111	7.25411e-108	2.47334e-106
Zfp462	4.06028	0.944354	2.06034	4.17085	7.51522e-108	2.55625e-106
Daam2	8.12986	1.6757	2.23576	4.7101	3.63541e-107	1.23362e-105
Pax9	0.448571	5.47928	-3.64816	0.0797615	4.40737e-107	1.49201e-105
Radil	0.628251	7.00157	-3.51779	0.0873051	4.4826e-107	1.51389e-105
Syt14	1.02414	0.0077613	6.93507	122.367	7.53093e-107	2.53737e-105
Phf10	44.6132	92.1144	-1.08875	0.47017	1.28593e-106	4.32242e-105
Mtus1	3.32739	14.0023	-2.11606	0.230675	1.44873e-106	4.8582e-105
Obfc1	18.651	4.44588	2.02523	4.07058	1.69045e-106	5.65547e-105
Mid1	8.43004	27.2403	-1.73488	0.300435	4.3743e-106	1.46001e-104
Prkg2	32.863	13.4184	1.24909	2.37691	4.49526e-106	1.49688e-104
Myl9	21.4733	80.6752	-1.95261	0.258349	6.49104e-106	2.15642e-104
Noc4l	56.2053	24.5518	1.15208	2.22235	8.42501e-106	2.7924e-104
Asxl3	0.930798	0.00339661	7.91146	240.762	1.1529e-105	3.81232e-104
Palm	17.6221	41.7806	-1.28816	0.409474	1.31218e-105	4.32897e-104
Adam19	8.80758	2.68278	1.67223	3.18706	1.61554e-104	5.31749e-103
Creg1	19.5997	5.68852	1.74143	3.34366	4.54061e-104	1.49108e-102
Cryab	31.9105	78.3127	-1.33795	0.395583	5.13002e-104	1.68076e-102
Gm53	0.0824007	12.1871	-7.15123	0.00703502	9.41118e-104	3.07633e-102
Pard6b	11.2188	3.12196	1.80207	3.48721	1.34081e-103	4.37281e-102
Cxxc5	7.05478	0.447651	3.93246	15.2682	1.71334e-103	5.57501e-102
Irx5	4.24191	15.4654	-1.90847	0.266374	2.20461e-103	7.15719e-102
Akap12	9.36044	27.8384	-1.61527	0.326403	4.95611e-103	1.60533e-101
Pcp4l1	5.28803	0.102681	5.61898	49.1453	5.28698e-103	1.70862e-101
Pdgfra	8.13655	35.542	-2.16956	0.222278	1.0205e-102	3.29054e-101
Gm11538	0	3.40207	-10.7936	0.000563379	4.58659e-102	1.47558e-100
Mfap5	0.314763	7.3153	-4.56346	0.0422925	9.73454e-102	3.1247e-100
Slc35g1	6.96543	0.779999	3.11493	8.6634	1.15995e-101	3.71496e-100
Slc6a15	2.92432	0.0593286	5.55173	46.9069	2.09518e-101	6.69517e-100
S100a6	1694.54	818.894	1.00624	2.00867	3.00251e-101	9.57309e-100
Rgma	1.54869	7.16632	-2.25209	0.20992	3.78867e-101	1.20527e-99
Cpox	11.3709	26.281	-1.25147	0.42002	5.49633e-101	1.74463e-99
Tnfaip2	10.1604	29.9857	-1.60381	0.329008	1.19942e-100	3.79868e-99
Podnl1	2.21446	13.5996	-2.66098	0.158112	1.28078e-100	4.04738e-99
Pacs2	10.8251	22.3112	-1.08628	0.470974	4.23749e-100	1.33612e-98
Rab38	5.21128	0.0126687	8.38758	334.898	4.7492e-100	1.49416e-98
Itga6	25.4043	9.08586	1.44026	2.7137	4.86679e-100	1.52779e-98
Lama5	24.0938	8.60356	1.44272	2.71834	5.06934e-100	1.58787e-98
Glis3	2.9829	10.8962	-1.91105	0.2659	5.53635e-100	1.73035e-98
Rab15	3.58925	0.151201	4.51623	22.8834	8.21531e-100	2.56203e-98
B3glct	3.77748	10.315	-1.49185	0.355557	1.42749e-99	4.44204e-98
Slc30a4	34.3262	15.3483	1.11822	2.17079	1.8673e-99	5.79798e-98
Loxl3	9.492	23.4939	-1.3501	0.392264	1.9136e-99	5.92883e-98
Galnt16	0.0313126	2.05585	-6.04734	0.0151206	2.01087e-99	6.21669e-98
Lpl	18.0462	39.7461	-1.18179	0.440803	3.1864e-99	9.82957e-98
Ccnb1ip1	0.121459	6.245	-5.70261	0.0192018	4.86883e-99	1.49872e-97
Mast4	9.91274	4.50621	1.0944	2.13524	4.88986e-99	1.50195e-97
Gatm	4.25703	0.02988	7.03906	131.513	6.4493e-99	1.97668e-97
Sh3pxd2a	22.7446	42.3877	-0.940855	0.520924	1.14852e-98	3.5126e-97
Il16	2.05866	0.108563	4.1905	18.2585	1.71475e-98	5.23311e-97
Uty	3.7633	0.273633	3.73143	13.2822	1.96425e-98	5.98172e-97
Hp	10.7004	0.910171	3.50695	11.3684	2.11577e-98	6.42943e-97
Mecom	7.67272	20.8943	-1.48797	0.356513	2.61534e-98	7.93059e-97
Wnk4	0.949822	5.77844	-2.646	0.159762	3.25281e-98	9.84267e-97
Tjp2	24.9093	10.1525	1.25178	2.38136	5.89719e-98	1.78065e-96
4930402H24Rik	12.5135	4.27971	1.50504	2.83832	6.03441e-98	1.81823e-96
Epha2	58.438	28.3889	0.998715	1.99822	9.94132e-98	2.98911e-96
Ppargc1a	1.17374	0.0202608	5.78321	55.0707	1.24145e-97	3.72486e-96
Slc25a24	66.9983	32.7613	0.989215	1.9851	1.38044e-97	4.13321e-96
Cldnd1	30.6508	64.9919	-1.12704	0.457854	1.71501e-97	5.12416e-96
Fstl3	1.04744	13.8095	-3.7636	0.073628	2.43474e-97	7.25939e-96
Farp2	3.94714	12.1243	-1.66199	0.316003	3.81639e-97	1.13551e-95
Smurf1	29.1398	13.3284	1.08556	2.1222	7.42515e-97	2.20465e-95
Fam46a	0.219291	2.3454	-3.45681	0.0910742	9.21595e-97	2.73068e-95
Slc25a10	31.5584	14.1474	1.11463	2.16539	1.2855e-96	3.80103e-95
Slco4a1	11.6882	3.26851	1.79526	3.47077	1.58596e-96	4.67975e-95
Chd7	1.61992	0.201875	2.95976	7.77993	2.04698e-96	6.02758e-95
Rhoq	22.6588	43.6267	-0.987891	0.504214	2.20192e-96	6.47047e-95
Angpt4	0.112265	5.14417	-5.52555	0.0217092	2.75358e-96	8.0749e-95
Gpr176	9.16891	2.67327	1.73501	3.32883	3.11816e-96	9.12526e-95
Chp1	100.217	50.625	0.942354	1.92166	4.14163e-96	1.20956e-94
Arl4c	16.4188	5.64859	1.49599	2.82059	4.15782e-96	1.2118e-94
Bnc1	10.669	3.41014	1.60214	3.03594	6.77645e-96	1.97098e-94
Itga11	0.100844	2.29665	-4.54442	0.0428542	7.07361e-96	2.05322e-94
Fam43a	1.48576	8.0208	-2.47375	0.180023	7.91759e-96	2.29353e-94
Figf	16.2568	46.1968	-1.54925	0.341687	9.73978e-96	2.81565e-94
Mst1r	5.64153	0.0455239	6.86842	116.842	1.32142e-95	3.81233e-94
Fam114a1	14.7599	31.3362	-1.12891	0.457263	2.42808e-95	6.99091e-94
Jdp2	11.7617	32.7503	-1.52025	0.348625	2.75628e-95	7.91985e-94
Sema3b	1.07769	5.94731	-2.50648	0.175985	3.5294e-95	1.01209e-93
Rftn1	2.97859	11.3141	-1.96788	0.255629	7.23547e-95	2.07068e-93
Eps8	71.0939	30.0319	1.20041	2.29806	8.44628e-95	2.41235e-93
Brinp1	2.50724	0.0483872	5.63207	49.593	9.83465e-95	2.80327e-93
Cgnl1	13.2348	5.25438	1.29016	2.44556	1.53091e-94	4.35499e-93
Emc2	51.532	113.32	-1.1796	0.441472	1.96203e-94	5.57029e-93
Plcb1	2.12476	0.10623	4.27167	19.3152	2.28123e-94	6.46364e-93
Ptpru	2.91161	0.151408	4.22171	18.6579	3.95613e-94	1.11871e-92
Ece1	18.4468	7.65173	1.22684	2.34053	4.7998e-94	1.35459e-92
Ugp2	46.7034	88.1089	-0.958517	0.514586	7.43484e-94	2.0941e-92
Amigo2	2.70673	0.0779581	5.05047	33.1392	1.18795e-93	3.33939e-92
Fam19a5	5.50756	0.0689938	6.2421	75.6937	2.44354e-93	6.85537e-92
Gata3	1.69012	7.46258	-2.18443	0.219999	3.17951e-93	8.90264e-92
Slc16a10	8.75579	1.01228	3.0677	8.38433	3.72758e-93	1.04168e-91
D8Ertd82e	5.30007	0.780185	2.72188	6.5973	5.57223e-93	1.55412e-91
Tor3a	4.37935	14.671	-1.78673	0.289828	6.76117e-93	1.88204e-91
Fzd2	24.5247	53.6369	-1.17184	0.443854	8.88277e-93	2.46778e-91
Nol4l	2.10039	0.187221	3.44275	10.8735	9.68838e-93	2.68636e-91
Kitl	15.8279	49.8294	-1.69701	0.308425	2.06313e-92	5.70945e-91
Ly6a	85.5864	374.644	-2.17295	0.221756	3.96085e-92	1.09399e-90
Rab8b	11.1579	23.763	-1.13346	0.45582	1.45172e-91	4.00193e-90
Cdh3	11.8275	30.5716	-1.413	0.375529	1.5794e-91	4.3455e-90
Qsox1	20.5772	41.9875	-1.07173	0.475749	1.69964e-91	4.66731e-90
Ackr3	11.7304	2.21178	2.36308	5.14466	1.86205e-91	5.10344e-90
Dok1	18.9829	41.268	-1.16298	0.44659	2.87635e-91	7.86828e-90
Ski	20.0078	37.2715	-0.940417	0.521082	3.02495e-91	8.25893e-90
Aldh3a1	4.64272	0.115383	5.2503	38.0626	3.80066e-91	1.0357e-89
Rerg	6.07795	0.384686	3.93419	15.2866	4.22957e-91	1.15038e-89
Ica1	10.3509	0.752311	3.7407	13.3679	4.78649e-91	1.29937e-89
Sec23a	15.8792	30.6822	-0.993144	0.502382	5.22072e-91	1.41456e-89
Lamb2	21.9661	38.6329	-0.857399	0.551947	5.68687e-91	1.53794e-89
Tfap2a	2.36336	0.0643095	5.14866	35.4733	6.36696e-91	1.7186e-89
Cped1	1.51692	9.16328	-2.63615	0.160856	6.88395e-91	1.85463e-89
Pam	33.7602	12.4008	1.40176	2.64224	7.09221e-91	1.90713e-89
Epha7	1.62239	0.0312217	5.62985	49.517	1.07683e-90	2.89021e-89
Acta2	284.731	952.281	-1.7847	0.290236	1.26153e-90	3.37959e-89
Ttll7	27.773	10.2788	1.39083	2.62229	2.37026e-90	6.3379e-89
Aars	109.765	183.307	-0.782691	0.581282	2.40892e-90	6.42919e-89
Col4a2	39.2458	80.5149	-1.07951	0.47319	2.72001e-90	7.24589e-89
Nr1h5	2.02027	0.00726424	7.86669	233.405	4.60496e-90	1.22444e-88
Tpcn1	18.1434	7.6693	1.19919	2.2961	6.82003e-90	1.81004e-88
Unc5c	4.06773	0.992726	1.99201	3.97791	7.13205e-90	1.88933e-88
Wnt7a	6.73664	0.294389	4.46818	22.1338	1.12331e-89	2.9702e-88
Sel1l	11.6355	21.6536	-0.938853	0.521647	1.41913e-89	3.74544e-88
Marcksl1	66.9521	24.8213	1.38859	2.61822	2.32929e-89	6.13624e-88
Fam60a	29.6768	12.4554	1.20952	2.31261	2.60835e-89	6.8587e-88
Mical2	75.1659	38.0202	0.940515	1.91921	5.54761e-89	1.45607e-87
Loxl1	24.8119	59.8099	-1.31222	0.4027	5.99027e-89	1.56936e-87
Hipk2	14.3303	5.40824	1.36272	2.5717	1.05735e-88	2.76502e-87
Nr2f1	11.9082	1.49917	2.94345	7.69248	1.24422e-88	3.24774e-87
Bcl9l	15.2962	29.8881	-1.00919	0.496824	1.28509e-88	3.34829e-87
Actg2	4.50309	23.6194	-2.43409	0.18504	1.37102e-88	3.56565e-87
Arhgef28	1.76397	6.35084	-1.89083	0.269652	2.12641e-88	5.52015e-87
Card10	5.54503	0.74835	2.84541	7.1871	2.48915e-88	6.45008e-87
Utrn	13.9168	25.7446	-0.93031	0.524745	3.1544e-88	8.15909e-87
Dock5	16.8218	8.84564	0.884457	1.84607	4.33275e-88	1.11866e-86
Gm2115	8.10652	26.2342	-1.73672	0.300051	8.23639e-88	2.12269e-86
Has2	8.26067	1.98053	2.01733	4.04835	9.47341e-88	2.43709e-86
Arrb1	4.97427	0.958337	2.33292	5.03823	1.05799e-87	2.71685e-86
Lynx1	2.67471	8.75325	-1.75288	0.296709	4.52925e-87	1.16099e-85
Otud4	63.1597	32.2907	0.925122	1.89885	6.35357e-87	1.62569e-85
Tnik	1.02986	0.02272	5.42949	43.0962	9.33084e-87	2.38321e-85
Omd	1.34741	12.7335	-3.28022	0.102933	2.55253e-86	6.50782e-85
Lpar4	1.33402	6.38567	-2.3017	0.202824	3.00943e-86	7.65899e-85
Rasef	1.36915	0.0117576	6.74965	107.609	3.58695e-86	9.1125e-85
Inppl1	43.2047	22.5093	0.897719	1.86312	5.73608e-86	1.45464e-84
Aff2	1.89457	0.0808892	4.49655	22.5734	1.97362e-85	4.9961e-84
Tmem108	1.9046	0.0353226	5.6674	50.8228	2.07834e-85	5.25185e-84
Nsg1	33.061	7.53216	2.09065	4.25939	3.05957e-85	7.7177e-84
Stat3	40.7402	17.273	1.19507	2.28955	6.485e-85	1.63294e-83
Inhbb	4.13755	0.507143	2.9822	7.90188	8.66771e-85	2.1787e-83
Nhp2	212.086	109.42	0.911835	1.88144	1.18578e-84	2.9753e-83
Ablim1	5.44781	13.3148	-1.33223	0.397153	1.35125e-84	3.38454e-83
Slc7a5	50.8205	92.995	-0.914502	0.530527	1.38933e-84	3.4738e-83
Wwc1	31.9276	14.1443	1.13164	2.19108	2.02346e-84	5.05049e-83
Mid1ip1	35.7355	69.6175	-1.00498	0.498278	2.86308e-84	7.13367e-83
Slc6a9	4.32189	13.4486	-1.67996	0.31209	2.90709e-84	7.23069e-83
Hk2	19.9697	8.93356	1.11768	2.16998	4.30828e-84	1.06971e-82
Nav1	6.13396	2.70356	1.13911	2.20245	7.82362e-84	1.93917e-82
Snd1	76.4618	41.4696	0.839794	1.78979	7.90165e-84	1.95511e-82
Plxdc2	1.25219	6.02214	-2.30832	0.201896	7.92046e-84	1.95637e-82
Kcnj2	1.28402	9.43821	-2.91924	0.132197	1.89751e-83	4.67877e-82
Meis1	9.57329	2.54764	1.86592	3.64501	2.17279e-83	5.34828e-82
Bid	22.7287	47.0137	-1.09121	0.469368	4.67139e-83	1.14787e-81
Enpp3	0.326763	7.34608	-4.52544	0.0434216	7.67202e-83	1.88196e-81
Mafb	0.598481	6.55855	-3.49427	0.0887402	9.61473e-83	2.35445e-81
D630045J12Rik	5.61488	1.75982	1.63112	3.09754	9.90528e-83	2.42144e-81
Dusp1	18.6164	42.0346	-1.21782	0.429932	1.15159e-82	2.81036e-81
Ankrd1	108.423	50.9719	1.04595	2.06472	1.42521e-82	3.47215e-81
Ank	71.1448	30.1267	1.1969	2.29247	1.5285e-82	3.71743e-81
Pgap1	3.13917	0.728687	2.06417	4.18192	2.22143e-82	5.3935e-81
Jph1	2.06456	0.10421	4.25179	19.051	2.43748e-82	5.908e-81
Fez1	0.535744	8.57521	-4.03469	0.0610152	2.77603e-82	6.71714e-81
Fzd5	5.23771	1.63582	1.63543	3.10681	2.8039e-82	6.77308e-81
Hsp90b1	364.751	616.774	-0.800701	0.57407	6.21229e-82	1.4981e-80
Slc25a13	20.7855	8.42688	1.25982	2.39465	6.66405e-82	1.60433e-80
Sept9	72.4532	38.0885	0.884719	1.84641	1.19725e-81	2.87744e-80
Ipmk	8.36715	16.7211	-1.04173	0.485746	1.69102e-81	4.0573e-80
Pcdh19	5.73471	12.8237	-1.20393	0.434091	1.74143e-81	4.17124e-80
2610507B11Rik	66.2502	37.6154	0.773733	1.70969	2.26953e-81	5.42708e-80
Pcdhgb2	0.143617	2.82674	-4.32772	0.0497996	3.18607e-81	7.606e-80
Rnf24	4.98755	10.9265	-1.17422	0.443122	3.2822e-81	7.8224e-80
5830416P10Rik	1.08808	0.0169028	5.89274	59.4143	3.52422e-81	8.38517e-80
Rbmx	13.3624	28.7065	-1.14589	0.451912	6.17877e-81	1.46766e-79
Dennd4a	4.47651	9.56957	-1.13894	0.454093	7.23971e-81	1.71681e-79
Rpgrip1l	2.3561	6.53868	-1.51499	0.349898	8.69708e-81	2.05898e-79
Hspb1	43.0639	3.38569	3.62494	12.3372	1.39415e-80	3.2951e-79
Gaa	68.1003	36.1953	0.869094	1.82652	2.00614e-80	4.7337e-79
Snai2	13.7253	31.7795	-1.25387	0.419323	3.60117e-80	8.48328e-79
Ssc5d	2.08434	7.68062	-1.92359	0.263598	9.20739e-80	2.16541e-78
Rcl1	57.9414	28.3028	0.990768	1.98724	1.20874e-79	2.83805e-78
Rhoj	4.48232	15.5967	-1.84107	0.279115	1.23418e-79	2.89303e-78
Plscr4	2.22153	0.0338257	5.9437	61.5506	1.33087e-79	3.11455e-78
H60b	0.535062	9.5258	-4.1911	0.0547462	1.35467e-79	3.16505e-78
Epn2	20.716	8.63753	1.21883	2.32758	1.90806e-79	4.45067e-78
Hmga2	222.852	91.0489	1.2488	2.37644	1.95033e-79	4.54184e-78
Pawr	19.5299	5.0102	1.91949	3.7829	1.97545e-79	4.59285e-78
Nfkb2	61.3068	32.452	0.874802	1.83376	2.58952e-79	6.01073e-78
Ptpn22	4.41532	0.302213	3.8216	14.139	2.64943e-79	6.13977e-78
Nrep	2.20592	13.1106	-2.61369	0.163381	4.03857e-79	9.34379e-78
Gstm2	16.1396	43.9933	-1.48954	0.356127	8.96239e-79	2.07021e-77
Gsn	91.7766	153.637	-0.786194	0.579872	1.44412e-78	3.33035e-77
Rps6ka6	2.94517	0.331038	3.10868	8.62594	2.23949e-78	5.15626e-77
Slc16a3	5.51529	0.684581	2.96375	7.80151	2.60583e-78	5.99006e-77
Lpar1	11.1101	29.7897	-1.46548	0.362116	3.60812e-78	8.28066e-77
Vopp1	27.3916	10.8661	1.29056	2.44623	3.91396e-78	8.96812e-77
Anks1b	0.934274	0.015273	5.84502	57.4814	4.77392e-78	1.0921e-76
Lipa	16.4201	34.9935	-1.13437	0.455535	5.87528e-78	1.3419e-76
Tln2	1.71516	4.76076	-1.51561	0.349749	6.14823e-78	1.40199e-76
Mink1	22.0151	9.72218	1.13617	2.19796	1.30494e-77	2.97093e-76
En1	2.43113	9.24166	-1.9693	0.255377	3.48114e-77	7.9128e-76
S100a10	462.783	231.761	0.954756	1.93825	5.14247e-77	1.16705e-75
Atrn	12.1628	6.00547	0.975415	1.96621	8.21003e-77	1.86025e-75
Olfm1	2.96147	19.7896	-2.7819	0.1454	1.01393e-76	2.29373e-75
Secisbp2l	16.6558	29.5767	-0.871226	0.546682	1.30328e-76	2.94365e-75
Hic1	0.566578	3.92749	-2.83598	0.14005	1.40468e-76	3.16763e-75
Aplp1	5.35527	0.538402	3.26841	9.63584	1.71677e-76	3.8653e-75
Tspyl1	17.4403	33.4952	-0.984387	0.50544	2.06684e-76	4.64615e-75
Ccrn4l	17.552	6.86548	1.311	2.48114	4.93834e-76	1.10837e-74
Slit2	26.7569	46.7998	-0.849388	0.55502	5.40949e-76	1.2122e-74
Suox	8.65494	20.9176	-1.31581	0.401699	5.50929e-76	1.23263e-74
Pdzrn3	11.7028	3.15346	1.84876	3.6019	6.00889e-76	1.3423e-74
Aff3	0.853112	3.35487	-2.01803	0.246896	6.05137e-76	1.34967e-74
Cda	11.7139	0.830817	3.76519	13.5968	9.00775e-76	2.00591e-74
Srgap3	1.76707	5.09362	-1.56979	0.336858	1.44317e-75	3.20874e-74
Wars	27.7588	49.3564	-0.873157	0.545951	1.47157e-75	3.2668e-74
Sox9	5.8426	1.38253	2.03618	4.10159	2.0658e-75	4.57882e-74
Sh3rf2	0.810927	5.05844	-2.6828	0.155739	2.17633e-75	4.81631e-74
Cmtm4	24.7068	45.3346	-0.918399	0.529096	2.45312e-75	5.42044e-74
Pdia5	14.0387	34.068	-1.32183	0.400026	3.27539e-75	7.22614e-74
Epb4.1l2	55.7432	91.9447	-0.764794	0.588537	3.36066e-75	7.40281e-74
Prnp	50.7255	85.2709	-0.792227	0.577452	3.74256e-75	8.23131e-74
Aqp5	8.78652	1.22375	2.79815	6.95549	4.0044e-75	8.79364e-74
Pitx2	2.39478	0.0349238	6.00086	64.0383	4.10919e-75	9.00988e-74
Serpinb1a	0.485871	6.73972	-3.83043	0.0702952	7.26767e-75	1.59107e-73
Kdelr3	17.8101	42.7046	-1.30446	0.404872	7.38726e-75	1.61477e-73
Il33	83.555	1.34017	5.91728	60.4336	8.8377e-75	1.92887e-73
Tspan8	3.76486	0.0141092	7.76365	217.316	9.78622e-75	2.13262e-73
Mprip	79.0567	44.2529	0.794299	1.73423	1.09321e-74	2.37869e-73
Shank3	0.705121	0.00288838	7.67863	204.879	1.34242e-74	2.91648e-73
Wnt10a	6.56992	0.24527	4.68655	25.7508	2.31759e-74	5.02743e-73
Mtmr10	18.2751	7.79441	1.18631	2.27569	2.55896e-74	5.54259e-73
Frs2	22.0573	41.2901	-0.947265	0.518615	3.70415e-74	8.01085e-73
Ttc9	3.39906	0.113934	4.84182	28.6769	8.51929e-74	1.83965e-72
Serpinb2	5.46802	0.158502	5.0525	33.1859	1.21698e-73	2.62396e-72
C1qtnf2	0.318639	5.38758	-4.11099	0.0578721	1.27475e-73	2.74437e-72
Ramp3	11.7608	0.892428	3.66792	12.7102	1.28063e-73	2.75288e-72
Galnt14	1.91248	0.00417392	8.37741	332.546	1.43503e-73	3.08014e-72
Bex2	8.33353	0.313895	4.67705	25.5818	1.81955e-73	3.89958e-72
Osbpl8	5.12268	10.6132	-1.09376	0.46854	2.52509e-73	5.40353e-72
Kdr	2.11475	0.206441	3.30949	9.91414	3.00128e-73	6.41293e-72
Fam110c	3.88004	0.251201	3.89438	14.8705	3.93537e-73	8.39624e-72
Rab10	42.4797	70.3362	-0.770378	0.586264	4.39276e-73	9.35809e-72
Plekha6	1.94325	0.0788339	4.56414	23.656	4.92323e-73	1.04725e-71
Serpina3h	1.15886	14.9351	-3.72718	0.0755104	5.19818e-73	1.10409e-71
Slc35f2	2.24344	0.0624528	5.08817	34.0166	5.33788e-73	1.13207e-71
Dusp5	22.3416	4.84804	2.15958	4.46786	8.67144e-73	1.83633e-71
Stc1	2.67847	0.102366	4.65696	25.2281	1.91931e-72	4.05845e-71
Pmaip1	2.98493	0.204798	3.81523	14.0766	2.49093e-72	5.25936e-71
Dync1h1	30.3167	49.022	-0.736162	0.600334	2.87619e-72	6.06382e-71
Znrf3	5.03385	1.60726	1.60412	3.0401	3.43451e-72	7.23022e-71
Syne1	2.89422	6.25104	-1.15361	0.449499	7.2263e-72	1.51901e-70
Zic2	1.40112	0	10.0809	1083.06	7.35044e-72	1.54283e-70
Gpr85	4.22533	0.467923	3.13106	8.76081	9.36217e-72	1.9622e-70
Pfkp	10.4148	2.88041	1.81043	3.50747	1.09775e-71	2.29737e-70
Syce2	12.9623	1.43794	3.12496	8.72383	1.1337e-71	2.36913e-70
Kcnh2	4.28667	0.69808	2.57272	5.94931	1.19484e-71	2.49325e-70
Cyb5r3	224.212	385.474	-0.82456	0.564654	1.23727e-71	2.57801e-70
Nod1	3.57706	0.611376	2.5039	5.67216	1.29601e-71	2.69645e-70
Galk2	20.6102	46.4393	-1.21465	0.430877	1.32724e-71	2.7574e-70
Pdlim1	74.638	147.963	-1.03011	0.489673	2.688e-71	5.57055e-70
Plod1	15.5221	30.672	-1.02529	0.49131	2.68913e-71	5.57055e-70
Stk26	2.91977	0.00997433	7.89733	238.414	3.28225e-71	6.78934e-70
Naf1	44.885	22.1938	0.973134	1.9631	4.59824e-71	9.49771e-70
Ppap2c	52.4651	23.4942	1.1162	2.16775	6.04153e-71	1.24608e-69
Bcar3	9.03868	2.87632	1.60889	3.05017	6.53967e-71	1.34687e-69
Thbs2	5.73728	26.414	-2.24544	0.210889	9.17279e-71	1.88644e-69
Nkain1	21.3021	7.01923	1.55797	2.94439	1.04429e-70	2.14455e-69
Dio3os	0.0956327	4.59492	-5.59242	0.0207259	1.23859e-70	2.53991e-69
Elmo1	1.09346	0.0254816	5.35642	40.9677	1.83243e-70	3.75226e-69
Gstt1	4.54149	30.9921	-2.81125	0.142472	2.55265e-70	5.21956e-69
Irx3	0.811881	8.22232	-3.38122	0.0959732	2.95125e-70	6.02596e-69
Pdgfd	2.11268	13.1772	-2.68251	0.15577	3.0653e-70	6.24989e-69
Btc	2.00905	0.0496178	5.27863	38.8174	5.12747e-70	1.04395e-68
Lima1	69.8337	110.745	-0.708087	0.612131	5.62431e-70	1.14348e-68
Tubb4a	3.24481	0.143865	4.43243	21.5921	5.94127e-70	1.2062e-68
Ephb2	2.39002	6.84424	-1.55999	0.339154	6.85405e-70	1.38953e-68
Mtap7d3	0	1.43171	-10.0688	0.000931079	7.18327e-70	1.4542e-68
Ar	1.73552	0	10.4052	1356.06	7.46251e-70	1.50859e-68
I830012O16Rik	0.628675	8.18689	-3.74059	0.0748119	7.69037e-70	1.55245e-68
Neto2	14.4387	5.16158	1.441	2.71508	8.67303e-70	1.74834e-68
Spon2	11.8598	1.94358	2.56617	5.92236	8.71299e-70	1.75392e-68
Snx7	21.2062	40.1748	-0.964494	0.512458	1.28055e-69	2.57411e-68
Fto	22.5194	38.2835	-0.808427	0.571004	1.34645e-69	2.70276e-68
Flrt1	0.503675	2.70627	-2.46783	0.180762	1.48204e-69	2.97076e-68
Mpp7	2.96162	0.192835	3.88803	14.8052	3.06777e-69	6.14071e-68
Atf4	201.221	333.461	-0.771545	0.58579	3.67087e-69	7.33762e-68
Lmo7	15.0956	26.9517	-0.879098	0.543707	4.59421e-69	9.17041e-68
Ltbp3	40.9472	20.7992	0.93442	1.91112	6.00319e-69	1.19661e-67
Galnt12	2.88629	0.136527	4.34652	20.3438	6.26795e-69	1.24764e-67
Mthfd1l	26.449	44.498	-0.793345	0.577005	8.16743e-69	1.62346e-67
Hebp2	2.97079	0.0739491	5.25375	38.1538	9.78551e-69	1.94238e-67
Tkt	73.5249	123.579	-0.792069	0.577515	1.30523e-68	2.58722e-67
Atp6v0e2	8.71707	1.79019	2.23885	4.7202	2.20213e-68	4.359e-67
Comt	33.2135	59.9456	-0.894799	0.537822	2.27281e-68	4.49266e-67
Inadl	2.92816	0.327481	3.11016	8.63479	2.27702e-68	4.49475e-67
Mab21l1	6.26614	1.30786	2.2174	4.65055	3.43856e-68	6.7782e-67
Tnrc18	19.5035	31.9314	-0.754121	0.592908	3.91047e-68	7.69779e-67
Sdpr	45.1843	86.6229	-0.981678	0.50639	4.00499e-68	7.87297e-67
Rbm47	4.35392	0.281834	3.89965	14.9249	4.80048e-68	9.42374e-67
Serpine2	2.12346	9.18549	-2.15408	0.224676	5.84827e-68	1.14649e-66
Tet1	0.168298	1.00573	-2.61907	0.162773	6.20227e-68	1.21421e-66
Ano1	3.30176	0.528174	2.60033	6.06425	9.22192e-68	1.80289e-66
Thrb	0.695804	0	10.1071	1102.94	9.34719e-68	1.82488e-66
Coq2	16.8484	3.5703	2.19395	4.57557	1.02503e-67	1.99846e-66
Ergic1	97.6604	155.135	-0.710546	0.611089	1.04042e-67	2.0257e-66
Jade1	16.5644	7.64398	1.07266	2.10331	1.17258e-67	2.27989e-66
Slc2a10	0.851002	4.81809	-2.54326	0.171554	1.30217e-67	2.52841e-66
Tgfa	2.91214	0.287601	3.29299	9.80141	1.4364e-67	2.78526e-66
Ahnak	777.88	1224.41	-0.697279	0.616734	3.06012e-67	5.92565e-66
Gata2	7.91324	1.55923	2.30082	4.92738	3.25048e-67	6.28573e-66
Usp12	21.666	10.7381	0.969815	1.95859	3.27934e-67	6.33295e-66
Asap2	7.81962	2.93508	1.37044	2.58549	5.48745e-67	1.05828e-65
Syndig1	0	2.39502	-10.3677	0.000756856	6.49712e-67	1.25131e-65
Mthfr	5.18611	11.3224	-1.16927	0.444647	8.20047e-67	1.57724e-65
Pqlc3	18.0064	46.3646	-1.40721	0.377041	8.34129e-67	1.60216e-65
Hoxc12	3.90515	25.9622	-2.7754	0.146056	9.2685e-67	1.77786e-65
Ulbp1	10.7314	2.44145	2.09213	4.26378	1.11953e-66	2.14457e-65
Coch	2.05312	12.3606	-2.6313	0.161398	1.2198e-66	2.3335e-65
Hccs	24.387	43.7	-0.88425	0.541769	1.26125e-66	2.40956e-65
Atp8a1	1.02045	0.0862912	3.51705	11.4482	1.26609e-66	2.41557e-65
Glipr2	13.0683	28.9257	-1.18914	0.438564	1.43581e-66	2.73572e-65
Hmox1	78.2387	183.93	-1.27578	0.413	1.7313e-66	3.29432e-65
Kremen1	3.96289	9.54168	-1.31056	0.403165	2.13943e-66	4.0655e-65
Glrx	24.4954	64.5419	-1.44033	0.368483	2.57046e-66	4.87806e-65
Chst11	11.2413	3.42458	1.67149	3.18543	4.29501e-66	8.13996e-65
Acox1	42.0533	24.036	0.764213	1.69844	5.05867e-66	9.57453e-65
Ftsj3	117.616	70.6431	0.6926	1.61619	5.36425e-66	1.01394e-64
Gm7120	5.15794	15.9626	-1.67286	0.31363	6.04037e-66	1.14023e-64
Rsbn1	11.6411	4.78828	1.2386	2.3597	9.14693e-66	1.72437e-64
Aes	126.096	212.471	-0.795635	0.57609	1.08786e-65	2.0481e-64
Rbpms2	16.8395	5.32768	1.61652	3.06635	1.22339e-65	2.30023e-64
Zfp41	3.13095	8.86892	-1.54495	0.342707	1.27698e-65	2.39782e-64
Col5a2	146.024	303.407	-1.09791	0.467192	2.40699e-65	4.51374e-64
Pcdhgc3	21.8739	38.8665	-0.872055	0.546368	4.74192e-65	8.88066e-64
Pea15a	61.7114	31.253	0.938751	1.91687	5.7071e-65	1.06612e-63
Gng12	55.6632	89.9993	-0.735987	0.600407	5.70761e-65	1.06612e-63
Tmem176b	127.726	70.692	0.810522	1.75385	6.29011e-65	1.17339e-63
Mbp	7.51849	0.850653	3.10096	8.57987	9.19122e-65	1.71233e-63
Tcf7l2	4.64426	10.6339	-1.23788	0.423996	1.00051e-64	1.86152e-63
Mxra8	23.0359	46.7225	-1.06295	0.478651	1.06911e-64	1.98657e-63
Rap1gap	6.32883	1.34226	2.19297	4.57245	1.19587e-64	2.21921e-63
Npepl1	24.6317	10.1897	1.23076	2.3469	1.72128e-64	3.19008e-63
Dlx4	2.30085	0.0226309	6.53225	92.556	1.81279e-64	3.35531e-63
Rgs17	0.66399	0.00253622	7.77938	219.699	2.43107e-64	4.49386e-63
Gpr64	12.5999	5.36335	1.18949	2.28073	2.58817e-64	4.77805e-63
Cpa6	0.464579	4.93044	-3.44685	0.0917052	2.9473e-64	5.43402e-63
Parp8	16.3914	6.14029	1.37317	2.59039	3.11153e-64	5.7294e-63
Mybbp1a	246.909	147.603	0.699429	1.62386	4.14743e-64	7.627e-63
Prnd	0.166238	2.39277	-3.88257	0.0677999	4.42513e-64	8.12718e-63
Cd44	89.3968	52.5182	0.724606	1.65245	5.43336e-64	9.96606e-63
Adamts3	0.548931	0.00271726	7.40554	169.546	6.05376e-64	1.10897e-62
Col2a1	0.162139	1.91675	-3.60173	0.0823706	7.88053e-64	1.44176e-62
Tmem200a	2.18711	0.145647	3.8511	14.431	9.40962e-64	1.71931e-62
Rasa1	34.8033	19.1553	0.818542	1.76362	1.31355e-63	2.39702e-62
Nfkbie	9.89181	2.51679	1.93047	3.81179	1.3292e-63	2.42248e-62
Ryk	56.9549	91.4928	-0.726643	0.604309	1.36514e-63	2.48479e-62
Tnfrsf21	11.9875	4.62538	1.33093	2.51564	1.60997e-63	2.92669e-62
Ptcd3	67.2062	35.6223	0.872865	1.8313	1.70602e-63	3.09734e-62
Tbc1d1	19.6411	9.92834	0.941567	1.92061	2.00815e-63	3.64124e-62
Pax3	1.2196	0.00591782	7.3913	167.882	2.21885e-63	4.01818e-62
Parm1	3.44903	0.256596	3.70141	13.0087	2.34926e-63	4.24893e-62
Rnf130	4.84621	1.91528	1.29639	2.45614	2.93657e-63	5.30443e-62
Als2cl	4.63585	0.981882	2.19621	4.58273	3.18897e-63	5.75307e-62
Irs1	7.37112	14.0558	-0.974134	0.509045	3.23147e-63	5.82236e-62
Bmp2	3.7664	0.56614	2.68849	6.44638	3.44442e-63	6.19822e-62
Cacna1g	0.98175	3.12068	-1.71087	0.305477	3.4553e-63	6.20995e-62
Tcf4	11.4112	19.3499	-0.804664	0.572495	5.46761e-63	9.81415e-62
Dusp22	1.90419	0.0624839	4.86052	29.051	5.73501e-63	1.02812e-61
Rhpn2	5.82	0.765693	2.88207	7.37205	6.65374e-63	1.19132e-61
Sdc2	48.0887	78.635	-0.752361	0.593631	7.05808e-63	1.26213e-61
Cyr61	358.375	172.208	1.01449	2.02018	1.4591e-62	2.60591e-61
Lrrc8d	8.3356	2.31147	1.80674	3.4985	1.50075e-62	2.67692e-61
Cd14	10.1155	2.31155	2.0858	4.2451	1.73783e-62	3.09594e-61
Tsr1	62.778	34.6748	0.813552	1.75753	1.91539e-62	3.40801e-61
Htatsf1	21.8284	38.8511	-0.874559	0.54542	2.05116e-62	3.64503e-61
Gucy1a2	1.0332	2.72172	-1.43994	0.368582	2.22412e-62	3.94747e-61
Pstpip1	3.70405	0.229041	3.96582	15.6254	2.25334e-62	3.99435e-61
Tsc22d3	6.13015	17.4534	-1.55235	0.340953	2.74116e-62	4.85305e-61
Grik5	4.15107	11.6433	-1.53037	0.346189	3.33666e-62	5.90001e-61
Cemip	2.9281	10.1525	-1.83637	0.280026	3.97793e-62	7.02521e-61
Jam2	3.04839	0.529323	2.48341	5.59219	4.6054e-62	8.12328e-61
Myl6	608.684	1012.55	-0.777136	0.583524	5.81947e-62	1.02521e-60
Pi15	0.154979	1.22737	-3.0225	0.123065	6.13557e-62	1.07956e-60
Plin4	0.542379	2.44408	-2.21313	0.215666	6.19456e-62	1.08859e-60
Sept11	67.776	110.18	-0.743849	0.597144	6.46197e-62	1.13419e-60
Phldb2	62.3955	38.1449	0.667076	1.58785	7.22483e-62	1.26652e-60
Hbp1	11.2861	23.859	-1.12253	0.459287	1.13799e-61	1.99246e-60
Fgf7	24.8156	11.0073	1.12969	2.18812	1.34006e-61	2.34338e-60
Aldh1a2	2.1572	0.0087242	7.63781	199.164	1.46644e-61	2.56124e-60
Gopc	9.82913	18.5269	-0.957299	0.51502	1.6605e-61	2.89663e-60
Vim	1628.51	2461.89	-0.638993	0.642161	1.67567e-61	2.91951e-60
Sox11	2.46288	0.252303	3.24494	9.48033	1.84093e-61	3.20353e-60
Tbc1d5	6.80521	12.8067	-0.955006	0.515839	1.86687e-61	3.24472e-60
Fzd3	1.10448	0.0810671	3.7191	13.1692	2.09547e-61	3.63758e-60
Mmp19	6.69205	18.3239	-1.49574	0.3546	2.37849e-61	4.12388e-60
Nxn	35.1701	17.6391	0.952637	1.93541	3.34277e-61	5.78871e-60
Nbea	3.56637	1.2761	1.43965	2.71256	4.01353e-61	6.94185e-60
Lrrc8e	1.57151	5.67772	-1.89521	0.268834	4.03383e-61	6.96849e-60
Gcn1l1	37.0559	22.5988	0.670611	1.59175	5.46039e-61	9.42148e-60
C1ra	8.84041	22.2826	-1.37637	0.385186	6.19368e-61	1.06738e-59
Immt	136.694	80.7107	0.717163	1.64395	6.24399e-61	1.07475e-59
Stxbp6	2.44662	0.164367	3.84266	14.3468	6.63087e-61	1.13997e-59
Traf1	3.48838	0.35534	3.24914	9.50799	7.1287e-61	1.22408e-59
Slc29a3	4.05563	9.11484	-1.21121	0.431907	1.29286e-60	2.21732e-59
Tfpi	22.7585	39.8737	-0.851878	0.554063	1.65704e-60	2.83847e-59
Zmynd15	1.93034	0.0571595	4.99682	31.9296	1.84846e-60	3.16258e-59
Nedd9	6.26727	13.697	-1.1708	0.444176	2.2348e-60	3.81899e-59
Trib1	27.0153	13.2692	0.982797	1.97629	2.61424e-60	4.46205e-59
Heg1	9.9073	3.11942	1.62376	3.08178	2.71329e-60	4.62558e-59
Peg12	2.30224	0.133114	4.05386	16.6086	2.9358e-60	4.99893e-59
Tle2	2.51171	10.7577	-2.14083	0.226749	3.39568e-60	5.77509e-59
Golm1	27.1773	14.3473	0.878772	1.83881	3.59662e-60	6.10953e-59
Wnk3	0.991974	0.0951834	3.32914	10.0501	4.18855e-60	7.10657e-59
Lpcat4	32.5826	12.7875	1.30618	2.47286	4.25816e-60	7.21608e-59
Oxct1	137.365	213.036	-0.675925	0.625931	5.46418e-60	9.24887e-59
Ahrr	0.610005	5.64904	-3.25261	0.104922	5.48219e-60	9.26835e-59
Krt18	21.122	4.96583	2.04476	4.12606	5.85899e-60	9.89363e-59
Etv5	11.5408	4.62895	1.27513	2.4202	7.1994e-60	1.21427e-58
Arhgap5	17.3516	30.1055	-0.837769	0.559508	7.49541e-60	1.2627e-58
Ppid	164.157	94.1463	0.759236	1.69259	8.55023e-60	1.4387e-58
Cul1	72.8112	43.7156	0.693125	1.61678	1.1926e-59	2.00435e-58
Gas5	21.3476	41.4096	-0.998614	0.500481	1.39077e-59	2.33466e-58
Fam84b	7.22697	2.69569	1.37915	2.60115	1.48437e-59	2.48885e-58
Rbms3	1.3826	3.76018	-1.48622	0.356947	1.69702e-59	2.84206e-58
Pitrm1	82.7609	47.563	0.756269	1.68912	1.87413e-59	3.135e-58
Bmper	39.0151	18.6756	1.02009	2.02804	2.29652e-59	3.83705e-58
Aig1	14.0405	2.97315	2.19499	4.57886	3.08541e-59	5.1491e-58
Axl	138.894	83.0237	0.699636	1.6241	3.26655e-59	5.44502e-58
Dzip1	5.07994	11.0506	-1.16374	0.446354	3.46226e-59	5.76451e-58
Vgll3	19.1875	41.0134	-1.13877	0.454148	4.42058e-59	7.35147e-58
Hip1	17.5625	9.65733	0.819823	1.76519	5.68645e-59	9.44561e-58
P4ha1	29.0288	46.7014	-0.728883	0.603371	5.84256e-59	9.69362e-58
Wisp1	21.3351	40.3596	-0.962652	0.513113	6.94749e-59	1.15134e-57
Gprc5b	14.8822	5.44587	1.40703	2.65191	7.92703e-59	1.31215e-57
Cpt1a	16.9657	28.7304	-0.802726	0.573265	9.87113e-59	1.63206e-57
Cdo1	0.614642	5.68941	-3.24582	0.105417	1.01493e-58	1.67611e-57
Ramp2	0.348107	7.32945	-4.41914	0.046742	1.25853e-58	2.07599e-57
C1qtnf1	9.60107	2.61498	1.83279	3.56224	1.2866e-58	2.11984e-57
Tpm3	300.769	187.627	0.637962	1.55613	1.35132e-58	2.2239e-57
Mars	55.1285	84.6432	-0.661427	0.632253	1.56743e-58	2.57659e-57
Cxx1b	18.9535	43.5557	-1.24345	0.422363	1.91002e-58	3.13612e-57
Slc6a17	1.00703	4.51138	-2.20466	0.216935	1.93863e-58	3.17944e-57
Cyp39a1	2.72314	9.59228	-1.85847	0.275768	2.28206e-58	3.73839e-57
Kcnn3	0.00403582	0.592324	-7.0851	0.00736498	2.57987e-58	4.22139e-57
Pid1	0.144241	2.01003	-3.8283	0.0703989	2.97177e-58	4.85707e-57
Tmem106b	30.6965	16.6792	0.837093	1.78645	4.49541e-58	7.33889e-57
Dync1li2	32.4933	51.6435	-0.7112	0.610812	5.16445e-58	8.42148e-57
Ptgir	0.200784	2.1627	-3.4651	0.0905529	8.2821e-58	1.34899e-56
Mmp13	36.517	3.65523	3.27762	9.69756	8.42356e-58	1.37046e-56
Stk39	16.7948	7.04099	1.2109	2.31482	1.00233e-57	1.62887e-56
Gpc2	2.11776	0.128233	3.98956	15.8846	1.96099e-57	3.18315e-56
Flnc	52.8906	31.5058	0.704629	1.62973	2.06592e-57	3.34966e-56
Gadd45g	30.5314	62.1302	-1.06782	0.47704	2.20038e-57	3.56362e-56
Cp	28.1347	6.91527	1.98186	3.95002	2.41186e-57	3.90168e-56
Etv6	14.1848	6.9362	0.989275	1.98519	2.52149e-57	4.07442e-56
Suclg1	104.078	56.8712	0.828945	1.77639	2.83327e-57	4.57302e-56
Aspa	3.05687	0.0710483	5.32133	39.9833	3.2425e-57	5.22762e-56
Prrg3	0.573962	0	9.79307	887.17	3.39515e-57	5.46753e-56
Arhgap28	7.64607	15.1439	-1.02864	0.490172	3.6373e-57	5.85088e-56
Gas1	22.6312	51.8422	-1.23849	0.423816	3.67275e-57	5.90125e-56
Arpc2	229.013	142.213	0.644561	1.56326	3.80548e-57	6.10762e-56
Ctnna1	169.184	106.592	0.623646	1.54076	3.98153e-57	6.38298e-56
Rhob	48.4112	80.2299	-0.771562	0.585783	4.84673e-57	7.76131e-56
Sept5	10.9204	22.0841	-1.0588	0.48003	8.45736e-57	1.3528e-55
Tmem263	13.3288	23.2074	-0.842919	0.557514	9.19112e-57	1.46852e-55
Cycs	73.7684	43.4925	0.719352	1.64644	1.38782e-56	2.21492e-55
0610007P14Rik	30.1087	57.6764	-0.9807	0.506734	1.55133e-56	2.4731e-55
Plxnb2	74.6574	45.8282	0.661115	1.5813	1.71877e-56	2.73698e-55
Eef2k	4.47061	9.2181	-1.08689	0.470774	1.81768e-56	2.89125e-55
Stmn2	0.413179	7.2445	-4.16421	0.0557761	2.13479e-56	3.39187e-55
Kcmf1	38.0266	21.4355	0.784162	1.72209	2.69547e-56	4.27793e-55
Lta4h	47.4381	77.3894	-0.748897	0.595058	4.61659e-56	7.31876e-55
Tmem98	53.5603	26.9862	0.946141	1.92671	5.17825e-56	8.20005e-55
Rnf181	83.2482	44.4919	0.861065	1.81638	5.56155e-56	8.79725e-55
Egr1	65.4092	7.88845	3.0091	8.05064	5.73902e-56	9.06791e-55
Slc12a2	20.5786	11.5236	0.793627	1.73343	9.18195e-56	1.44918e-54
Ptger3	2.56125	0.00990019	7.71892	210.682	9.47483e-56	1.49375e-54
Naga	6.30482	17.788	-1.53932	0.344046	1.10092e-55	1.73373e-54
Synj2	11.6914	5.47377	1.05153	2.07273	1.32169e-55	2.0791e-54
Bak1	58.0691	97.1279	-0.785062	0.580327	1.71594e-55	2.69632e-54
Rab6b	5.10487	12.0104	-1.27702	0.412648	2.11903e-55	3.32603e-54
Abr	29.4408	16.3499	0.805683	1.74797	2.29285e-55	3.59491e-54
Manba	5.19449	0.665528	2.92261	7.58215	2.36775e-55	3.70827e-54
Il11ra1	4.60814	15.6305	-1.80427	0.286326	3.52461e-55	5.51403e-54
Ninj1	37.3638	15.8995	1.18946	2.28067	3.67389e-55	5.74127e-54
Mfge8	117.624	70.0578	0.704669	1.62977	4.42982e-55	6.91498e-54
Tbx18	4.78063	10.0575	-1.11562	0.461491	4.473e-55	6.97474e-54
Kdm5d	3.64097	0.27557	3.68121	12.8279	4.8362e-55	7.53284e-54
Prrx2	31.1993	65.5989	-1.11483	0.461747	5.93949e-55	9.24123e-54
Xpot	35.3392	57.0288	-0.733243	0.60155	7.10823e-55	1.10476e-53
Ret	0.211322	1.89809	-3.20808	0.108211	8.40065e-55	1.30421e-53
Ptn	12.4741	40.1587	-1.72962	0.301532	8.82344e-55	1.36835e-53
Fmn1	9.40673	5.14834	0.826706	1.77363	1.03233e-54	1.59921e-53
Apba3	15.3273	29.9539	-1.00936	0.496768	1.27623e-54	1.9749e-53
2210016F16Rik	3.48626	0.49961	2.75843	6.76662	2.06173e-54	3.18695e-53
Glt1d1	2.60666	0	10.0479	1058.6	2.09617e-54	3.23668e-53
Nme1	251.81	149.09	0.713189	1.63942	2.1422e-54	3.30418e-53
Pik3ip1	2.16785	10.1954	-2.27515	0.206591	2.54154e-54	3.9159e-53
Pag1	2.73434	0.511099	2.37615	5.19149	2.82636e-54	4.35003e-53
Gabra4	1.23165	0	10.3696	1323.01	3.0574e-54	4.70055e-53
Snhg12	17.6023	47.7332	-1.48221	0.357941	3.45203e-54	5.30154e-53
Jak2	17.6703	9.44798	0.860355	1.81548	3.74597e-54	5.74679e-53
Tlr2	3.62536	12.6602	-1.84636	0.278094	3.82725e-54	5.86516e-53
Metap1	50.726	28.2357	0.802297	1.74388	4.08067e-54	6.24679e-53
Med16	9.94102	19.0049	-0.977448	0.507877	4.48659e-54	6.86083e-53
Tysnd1	10.9864	33.015	-1.62924	0.323259	5.22641e-54	7.98358e-53
Rrp12	31.469	17.5682	0.798101	1.73881	6.18325e-54	9.43508e-53
Fgfrl1	12.7512	4.33352	1.51371	2.85543	6.60347e-54	1.00655e-52
Atp6v0a4	3.76677	0.759599	2.26634	4.811	7.02783e-54	1.07009e-52
Epha3	0.461445	3.285	-2.87226	0.136572	1.19295e-53	1.81451e-52
Myof	136.775	83.1558	0.675181	1.5968	1.70432e-53	2.58955e-52
Abl2	13.7536	8.04529	0.730611	1.65934	1.7852e-53	2.70956e-52
Ruvbl1	100.568	60.5398	0.689339	1.61254	2.50796e-53	3.80249e-52
Sms	43.5654	26.076	0.697532	1.62173	3.09922e-53	4.69395e-52
Sfrp4	1.80446	0	9.69145	826.831	3.55046e-53	5.37167e-52
Zfp871	10.5726	16.7917	-0.710297	0.611194	3.58584e-53	5.41945e-52
Wdr1	183.831	113.323	0.65501	1.57463	3.5932e-53	5.42482e-52
Map1b	19.2026	10.353	0.848492	1.80062	3.98891e-53	6.01586e-52
Traf4	21.2108	10.885	0.919686	1.8917	4.46807e-53	6.73138e-52
Tnfrsf11a	1.18192	0.104107	3.45309	10.9518	4.78882e-53	7.207e-52
Rnf144b	1.59053	0.203314	2.91789	7.55742	5.14347e-53	7.73256e-52
Ppp3ca	12.9478	5.92987	1.08374	2.11953	5.90375e-53	8.8662e-52
Snw1	41.2748	65.2349	-0.703277	0.614176	6.1103e-53	9.16674e-52
Lgr6	3.47554	0.495488	2.76344	6.79015	6.8144e-53	1.02123e-51
Rbm20	0.988671	0.105123	3.18302	9.08207	6.98005e-53	1.04496e-51
Disp1	10.1959	4.63309	1.09502	2.13616	8.178e-53	1.22301e-51
Gpc4	15.7802	33.5221	-1.12994	0.456934	1.00621e-52	1.5032e-51
Zak	23.5723	11.0816	1.04614	2.06499	1.08145e-52	1.61392e-51
Nop2	105.796	61.7086	0.734799	1.66417	1.28021e-52	1.90853e-51
Frmd5	1.29082	0.0621545	4.31275	19.8731	1.62412e-52	2.4187e-51
Plcb4	3.65772	0.501473	2.82194	7.07114	1.68494e-52	2.50666e-51
Impdh1	27.713	14.4925	0.892248	1.85607	1.834e-52	2.72556e-51
Ttyh3	14.7022	7.1281	1.00177	2.00246	1.92267e-52	2.85437e-51
Slc39a3	4.15855	10.1691	-1.3325	0.39708	2.26815e-52	3.36375e-51
Fam26e	1.20154	6.29395	-2.42853	0.185754	2.61296e-52	3.87109e-51
Sorbs1	2.69435	6.57892	-1.33008	0.397745	2.65257e-52	3.92569e-51
Dach1	0.725625	0.0219908	4.94998	30.9095	3.31714e-52	4.90414e-51
Sh3rf1	13.4964	6.49966	1.011	2.0153	4.2008e-52	6.20412e-51
Sort1	7.63237	3.41269	1.11808	2.17057	4.7721e-52	7.04058e-51
Wnt11	1.79871	0.125926	3.77621	13.701	4.93678e-52	7.27601e-51
Serbp1	157.509	99.7133	0.616765	1.53343	6.26339e-52	9.22168e-51
Cep128	3.56355	8.36887	-1.27421	0.413451	6.44679e-52	9.4819e-51
Mmp9	1.84798	0.117161	3.92343	15.1729	6.59124e-52	9.68437e-51
Cluh	38.7328	23.7913	0.660333	1.58045	7.34088e-52	1.07747e-50
Sec16b	0.532287	3.20369	-2.62906	0.16165	8.55631e-52	1.25457e-50
Nipal1	5.86124	1.32121	2.10593	4.30476	9.47545e-52	1.38791e-50
Ly6c1	63.4516	256.248	-2.05687	0.240336	9.70781e-52	1.42049e-50
Lims1	46.7776	75.9117	-0.741259	0.598217	1.43886e-51	2.10324e-50
Gpt2	8.30405	15.507	-0.943844	0.519846	1.50555e-51	2.19848e-50
Tnfrsf12a	335.254	177.006	0.87842	1.83836	1.5477e-51	2.2577e-50
Bcam	2.66687	0.134027	4.25944	19.1522	1.59257e-51	2.32078e-50
H2afx	79.1737	141.881	-0.884371	0.541724	1.65369e-51	2.4074e-50
Rbm19	26.5981	14.8434	0.79849	1.73928	1.69377e-51	2.46322e-50
AI506816	151.711	75.2989	0.967973	1.95609	1.73372e-51	2.51875e-50
Snx18	13.7204	22.829	-0.777471	0.583388	2.22685e-51	3.23188e-50
Sdk1	0.33915	0	9.55587	752.67	2.59824e-51	3.76705e-50
Sssca1	85.9161	42.6112	0.96893	1.95739	2.99205e-51	4.33361e-50
Slc1a6	0.0480579	2.69931	-5.78974	0.0180765	3.51447e-51	5.0851e-50
Sgpl1	29.7844	48.6354	-0.750243	0.594504	3.81314e-51	5.51165e-50
Ccdc102a	12.2516	25.0476	-1.07422	0.474929	3.8895e-51	5.61633e-50
Jup	17.486	9.05505	0.906597	1.87462	4.76094e-51	6.86771e-50
Ap3m1	19.3619	30.3551	-0.691556	0.619186	5.88036e-51	8.4739e-50
Amot	27.3074	46.4587	-0.809582	0.570547	6.11304e-51	8.8003e-50
Nedd4	271.081	396.465	-0.59129	0.663749	6.69189e-51	9.6239e-50
Zcchc24	18.8686	33.8276	-0.884959	0.541503	7.40624e-51	1.06405e-49
Syt7	5.21839	0.737012	2.77912	6.86432	9.95948e-51	1.42943e-49
Igf2r	17.7976	26.932	-0.640441	0.641517	1.24481e-50	1.78482e-49
Lgr4	5.53544	10.9919	-1.03244	0.488882	1.342e-50	1.92223e-49
Ptchd4	2.01014	4.96686	-1.34759	0.392947	1.47641e-50	2.11263e-49
Cldn12	28.1524	14.1203	0.952724	1.93552	1.81536e-50	2.59503e-49
Zfp160	5.72704	11.7693	-1.08173	0.472463	1.94867e-50	2.78281e-49
Scel	1.83478	0.0764169	4.5314	23.1253	2.30853e-50	3.29341e-49
Slco5a1	0.53925	0.0237365	4.44389	21.7642	2.44034e-50	3.47798e-49
Tmem242	37.8981	71.0158	-0.948841	0.518048	2.84391e-50	4.04909e-49
Tns4	1.88855	0.148428	3.622	12.3121	3.29712e-50	4.68968e-49
Syt9	0.780816	0	9.60101	776.589	4.2958e-50	6.10407e-49
Ly6c2	6.54335	24.58	-1.95063	0.258704	4.34738e-50	6.1712e-49
Ezh2	47.8247	25.8371	0.845481	1.79686	5.40768e-50	7.66868e-49
Wipf1	10.4682	17.9922	-0.824106	0.564832	5.6569e-50	8.01413e-49
Cachd1	5.15281	10.2478	-1.03466	0.48813	5.97235e-50	8.45262e-49
Slc4a8	0.427074	0.0163948	4.64909	25.0908	6.08724e-50	8.60668e-49
Ralgapa2	4.46247	2.0682	1.06655	2.09442	6.20985e-50	8.77134e-49
Cyth4	1.29496	0.0178432	6.02472	65.1061	6.48092e-50	9.14516e-49
Crlf1	2.69518	9.52116	-1.86215	0.275065	7.01741e-50	9.8924e-49
Chst15	2.51711	0.399441	2.60797	6.09643	7.26115e-50	1.02259e-48
Slc20a2	44.9901	26.1303	0.741115	1.67147	8.34123e-50	1.17354e-48
Rassf2	3.01733	7.4941	-1.35466	0.391027	9.15443e-50	1.28668e-48
Klf12	1.57423	0.25772	2.56536	5.91903	9.30969e-50	1.30721e-48
Hmgcs1	47.2823	95.7181	-1.06058	0.47944	9.37887e-50	1.31563e-48
Gm5662	0.0274828	1.93842	-6.07797	0.014803	1.05645e-49	1.48049e-48
Ankrd50	17.2192	9.2995	0.84597	1.79747	1.4353e-49	2.00942e-48
Zcwpw1	9.03007	2.66571	1.71609	3.28544	1.58187e-49	2.21244e-48
Ptk7	17.5687	27.7577	-0.702658	0.614439	1.59908e-49	2.23432e-48
Hp1bp3	46.328	28.2576	0.670416	1.59153	1.61658e-49	2.25657e-48
Slc38a4	34.2645	51.4377	-0.628927	0.646657	1.74755e-49	2.43699e-48
Cdc42ep3	58.2869	102.195	-0.852884	0.553677	1.80127e-49	2.50945e-48
Unc119b	21.1988	11.6541	0.820193	1.76564	1.97663e-49	2.75107e-48
Vasp	58.8642	34.721	0.718663	1.64566	2.29764e-49	3.19473e-48
Ehd2	48.5011	74.7311	-0.666472	0.630046	2.37769e-49	3.30281e-48
Sipa1l1	10.7195	16.659	-0.678871	0.624654	3.0029e-49	4.16722e-48
BC022687	5.00447	13.5295	-1.47748	0.359116	3.06695e-49	4.25196e-48
Stat6	22.6529	38.7155	-0.81603	0.568003	3.98605e-49	5.52082e-48
Cysltr1	1.14476	0.013499	6.22806	74.9604	4.24191e-49	5.86949e-48
Tert	1.37662	0.0410566	4.98723	31.718	4.90155e-49	6.77565e-48
Atp6v1b2	89.7346	55.9513	0.638568	1.55678	4.95686e-49	6.84546e-48
Mcm10	23.7969	12.6809	0.865198	1.82159	5.00902e-49	6.91079e-48
Slc16a6	0.865809	3.30693	-1.97539	0.254301	6.43773e-49	8.87336e-48
Pank2	8.80217	15.4805	-0.857249	0.552004	7.36779e-49	1.01455e-47
Arf6	30.6937	47.0177	-0.658138	0.633696	7.43938e-49	1.02342e-47
Ap2m1	116.695	170.561	-0.590428	0.664146	8.13306e-49	1.11777e-47
Lrrc8c	21.9069	8.66982	1.29417	2.45236	8.9648e-49	1.23089e-47
Sgk1	123.603	63.0022	0.929438	1.90453	9.63956e-49	1.32226e-47
Micu1	39.365	66.2027	-0.792785	0.577229	1.12313e-48	1.53912e-47
St3gal6	2.4854	0.0888578	4.73471	26.625	1.15331e-48	1.57896e-47
Ncapd2	61.5235	37.8685	0.657288	1.57711	1.2199e-48	1.66852e-47
Lgmn	37.0382	58.371	-0.699065	0.615971	1.26469e-48	1.72813e-47
Itpr2	0.716091	2.08901	-1.58708	0.332845	1.45346e-48	1.98417e-47
Il17rc	11.2244	21.6982	-0.993713	0.502184	1.5453e-48	2.10752e-47
Chchd3	77.575	46.1896	0.705073	1.63023	2.32766e-48	3.17149e-47
Plekhh2	18.9801	11.1715	0.721802	1.64924	2.38233e-48	3.24288e-47
Tcf19	40.7563	67.4706	-0.770101	0.586376	2.7034e-48	3.67642e-47
Six2	1.34128	0.0094775	6.84981	115.345	2.85518e-48	3.87913e-47
Cdsn	1.86874	7.23447	-1.9943	0.250989	2.93887e-48	3.98902e-47
Nedd4l	8.43698	4.49582	0.865089	1.82145	3.34704e-48	4.53872e-47
Murc	0.952915	5.68667	-2.61842	0.162846	3.43408e-48	4.65232e-47
Ror1	2.08824	0.0878434	4.5101	22.7864	3.59986e-48	4.87229e-47
N4bp3	6.21375	1.36551	2.14078	4.41002	4.03309e-48	5.45347e-47
Steap1	74.875	39.4724	0.880529	1.84105	4.04489e-48	5.46424e-47
Stxbp2	8.55103	2.91237	1.51078	2.84964	4.11226e-48	5.54999e-47
Rspo3	3.44682	0.629028	2.40818	5.30804	4.42738e-48	5.96964e-47
Ptgr1	12.2363	23.4683	-0.982224	0.506199	4.93319e-48	6.64536e-47
Zfyve26	3.368	7.19541	-1.13789	0.454423	5.63482e-48	7.58333e-47
Npcd	18.0698	29.1077	-0.730733	0.602598	6.1404e-48	8.25594e-47
Akap8l	10.1892	20.4799	-1.0501	0.482936	6.49533e-48	8.72493e-47
Golga5	9.86708	18.5844	-0.956132	0.515437	7.59155e-48	1.01878e-46
Dgkd	16.0514	9.24342	0.753281	1.68562	7.7139e-48	1.03423e-46
Npr2	5.16838	11.351	-1.1779	0.441995	9.39395e-48	1.25829e-46
Gjb2	2.0443	7.09944	-1.83791	0.279726	9.48106e-48	1.26877e-46
Os9	14.1988	25.6029	-0.89331	0.538378	9.72769e-48	1.30055e-46
Anxa6	128.333	78.8362	0.66005	1.58014	9.76661e-48	1.30453e-46
Cxx1a	11.6331	26.4887	-1.22993	0.426337	1.08527e-47	1.44824e-46
Fgfr2	6.657	12.7599	-0.981457	0.506468	1.0995e-47	1.46586e-46
Mmp15	0.0311722	0.904644	-4.87732	0.0340235	1.10697e-47	1.47444e-46
Actn1	128.856	201.728	-0.689416	0.620105	1.11109e-47	1.47855e-46
AW551984	0.815181	0.00937618	6.27785	77.5929	1.12085e-47	1.49014e-46
Fxyd5	29.4816	11.4358	1.32358	2.50286	1.58046e-47	2.09923e-46
Plin3	31.2867	58.1039	-0.935916	0.52271	1.63412e-47	2.16848e-46
Pitpnc1	0.98009	3.97527	-2.0615	0.239567	2.1446e-47	2.84325e-46
Pan2	5.55537	10.5333	-0.965881	0.511966	2.17463e-47	2.88038e-46
Foxo1	3.95674	8.31602	-1.11446	0.461864	2.46192e-47	3.25787e-46
Celsr1	1.06031	0.233816	2.13681	4.39788	2.80014e-47	3.702e-46
Gemin5	25.7225	15.5179	0.686172	1.60901	2.88899e-47	3.81592e-46
Pja2	36.2387	59.5284	-0.758825	0.590978	3.33321e-47	4.39861e-46
Map6	10.7865	18.9896	-0.858949	0.551354	3.65727e-47	4.82177e-46
Frmd6	21.0058	34.7857	-0.770524	0.586205	3.88588e-47	5.11845e-46
Mylk	0.508344	1.84666	-1.90205	0.267563	4.32611e-47	5.69305e-46
Adcy1	0.37871	0.0181106	4.32513	20.0444	4.74558e-47	6.23929e-46
Map4	46.1862	67.6971	-0.594459	0.662293	4.84445e-47	6.36342e-46
Egln3	4.59182	1.04278	2.09322	4.267	5.03267e-47	6.60456e-46
Ncam2	1.07279	0.00577675	7.28414	155.864	5.22047e-47	6.84472e-46
Snx13	7.99908	14.3725	-0.888067	0.540338	5.60225e-47	7.33853e-46
Cd74	1.19053	7.00268	-2.59718	0.165261	6.70689e-47	8.77746e-46
Slc39a9	7.19522	12.5395	-0.844213	0.557015	6.74854e-47	8.82387e-46
Capn6	19.4185	7.9613	1.2432	2.36723	7.0372e-47	9.19287e-46
Daam1	6.55366	12.0838	-0.925666	0.526437	7.23368e-47	9.44089e-46
Rgs2	6.40381	1.66595	1.89985	3.73175	7.49593e-47	9.7742e-46
Foxf1	4.83347	0.859956	2.44388	5.44105	7.89133e-47	1.02804e-45
Aebp1	192.555	97.2881	0.942132	1.92137	8.0022e-47	1.04153e-45
Dkk1	1.48813	0	9.76044	867.334	1.02432e-46	1.33199e-45
Esx1	1.67322	0.00624331	7.56118	188.861	1.03011e-46	1.3383e-45
Tdrp	1.9155	0.106265	4.11138	17.2842	1.03718e-46	1.34626e-45
Svip	0.519913	3.10919	-2.62096	0.162559	1.06245e-46	1.3778e-45
Rab3il1	1.62479	7.16761	-2.18233	0.22032	1.30392e-46	1.68941e-45
Psap	305.755	458.597	-0.627656	0.647227	1.36633e-46	1.76866e-45
Khdrbs3	20.6145	6.16887	1.69821	3.24498	1.38984e-46	1.79746e-45
Mark1	0.65394	3.10071	-2.28555	0.205107	1.67457e-46	2.16373e-45
Zranb2	62.253	37.1561	0.701569	1.62627	2.02184e-46	2.61008e-45
Man2b2	8.39413	16.0886	-0.981321	0.506516	2.39901e-46	3.09418e-45
Tmtc1	0.393509	0.013323	4.80307	27.9169	2.43328e-46	3.13554e-45
Apcdd1	3.91102	9.56925	-1.33332	0.396854	2.79596e-46	3.59964e-45
Sept3	1.2316	0.140722	3.08366	8.47765	2.89965e-46	3.72977e-45
Osbpl6	2.45901	0.724078	1.71941	3.29301	3.17218e-46	4.07663e-45
Fn1	429.011	259.448	0.682636	1.60507	3.32299e-46	4.2666e-45
Thbd	1.14236	0.0706871	3.9596	15.5582	5.71695e-46	7.33375e-45
Ppfibp2	1.46197	0.110102	3.67483	12.7712	6.23941e-46	7.99677e-45
Vps52	24.151	38.1988	-0.704179	0.613792	6.91575e-46	8.85564e-45
Nxf3	0.865195	0	9.3915	671.618	6.95233e-46	8.89448e-45
Msrb1	23.7197	49.1078	-1.09277	0.468859	8.6895e-46	1.1107e-44
Cdh2	44.8986	26.139	0.737659	1.66747	9.30042e-46	1.18772e-44
Lurap1l	29.8336	58.6026	-1.01685	0.494193	9.91004e-46	1.26444e-44
Syngr2	83.0041	48.6846	0.72697	1.65516	1.20965e-45	1.54204e-44
Ell2	13.9356	25.4172	-0.909842	0.532243	1.25523e-45	1.59871e-44
Tnfrsf23	12.9198	5.29551	1.24329	2.36737	1.33734e-45	1.70177e-44
Lyn	0.624348	3.06717	-2.33715	0.197901	1.36551e-45	1.73606e-44
Bcor	8.22391	13.4335	-0.750727	0.594304	1.44022e-45	1.82941e-44
Hnrnpab	413.538	272.08	0.561143	1.47544	1.5364e-45	1.94985e-44
Ufsp2	24.0547	44.6962	-0.936812	0.522386	1.63789e-45	2.07679e-44
Senp3	70.5012	44.0915	0.634238	1.55212	1.77766e-45	2.25202e-44
Mitf	1.29806	6.49362	-2.36422	0.194223	2.00361e-45	2.53601e-44
Ubl3	21.9812	10.6818	0.998081	1.99734	2.14493e-45	2.71247e-44
Rsu1	58.8931	94.7144	-0.728467	0.603545	2.51472e-45	3.17728e-44
Hmga2-ps1	0.784798	7.48701	-3.29224	0.102079	2.82555e-45	3.56685e-44
Polr1d	149.332	94.1461	0.622666	1.53972	3.19931e-45	4.03509e-44
Igf2bp1	14.6621	8.64688	0.719044	1.64609	3.35039e-45	4.22117e-44
Phlpp1	6.8507	3.2403	1.03733	2.05243	3.35277e-45	4.22117e-44
Socs6	25.9561	11.6291	1.11516	2.16619	4.02563e-45	5.06383e-44
Lamb1	50.2623	30.7096	0.668012	1.58888	4.59257e-45	5.76876e-44
Git1	33.7275	20.373	0.684423	1.60706	4.59412e-45	5.76876e-44
2010300C02Rik	0.600004	0	9.41367	682.018	5.33821e-45	6.69719e-44
Pla2g16	0.615895	3.3233	-2.47249	0.18018	6.09098e-45	7.63488e-44
Cd300lb	1.90502	0.0357537	5.67158	50.9702	6.65288e-45	8.33189e-44
Arhgap24	5.37255	10.8529	-1.05718	0.480571	9.13209e-45	1.14267e-43
Ltbp4	9.97641	16.4792	-0.766763	0.587735	9.89415e-45	1.23694e-43
Akr1c18	4.07249	0.119795	5.00501	32.1113	9.9472e-45	1.24249e-43
Sar1a	81.0472	118.927	-0.59604	0.661567	1.00766e-44	1.25754e-43
Rps2	3130.03	4487.26	-0.56255	0.677104	1.14213e-44	1.42411e-43
Fbxo30	10.9279	19.0267	-0.842789	0.557565	1.14809e-44	1.4303e-43
Thsd4	2.12234	0.395867	2.37822	5.19896	1.1533e-44	1.43553e-43
Rarg	59.0152	95.964	-0.744197	0.597	1.16948e-44	1.4544e-43
AI504432	0.503931	0	9.50865	728.43	1.18519e-44	1.47265e-43
Reck	0.308899	1.92744	-2.68161	0.155867	1.27858e-44	1.58731e-43
Trps1	3.51954	6.17969	-0.854734	0.552967	1.4043e-44	1.74187e-43
Rbm28	44.4177	27.5425	0.646499	1.56536	1.83568e-44	2.27496e-43
Emg1	118.01	70.7458	0.695338	1.61926	1.9265e-44	2.38545e-43
Arhgef10	9.22654	15.0727	-0.750968	0.594205	2.12023e-44	2.62305e-43
Gak	35.3444	21.5027	0.674045	1.59554	2.19769e-44	2.71653e-43
Gm6644	17.0048	5.5257	1.57872	2.98704	2.35575e-44	2.90937e-43
Chchd4	31.7992	14.3587	1.10366	2.14899	2.437e-44	3.00711e-43
Lphn3	3.11897	0.308131	3.29677	9.82715	2.8169e-44	3.47288e-43
Hpse	3.53051	0.56399	2.60017	6.06357	2.96649e-44	3.65414e-43
Rem1	1.70039	0.0128472	6.79629	111.145	3.00084e-44	3.69326e-43
Sirt1	10.8183	18.3619	-0.806073	0.571937	3.67334e-44	4.51703e-43
Klf8	0.621983	2.73961	-2.18126	0.220483	4.20664e-44	5.16837e-43
St8sia1	0.428742	0.00441692	6.41562	85.3677	6.41184e-44	7.87093e-43
Cbln1	3.9239	0.741257	2.3597	5.13264	7.33421e-44	8.99545e-43
Fras1	1.14461	0.210528	2.39903	5.27448	7.69986e-44	9.4358e-43
Sh3rf3	3.16647	6.6715	-1.11776	0.46081	8.43223e-44	1.03244e-42
Satb1	0.481128	0.00780449	5.77736	54.8478	1.0119e-43	1.23791e-42
Col18a1	6.76432	1.93249	1.76394	3.39624	1.15029e-43	1.40599e-42
Exph5	0.456925	0.0376549	3.5439	11.6632	1.17408e-43	1.43384e-42
Cacnb2	4.93254	1.36823	1.80686	3.4988	1.19382e-43	1.4567e-42
Tgfb2	2.97026	6.70329	-1.21698	0.430182	1.22158e-43	1.4893e-42
Zyx	208.808	126.986	0.674696	1.59626	1.36713e-43	1.66533e-42
Enah	7.77619	12.4678	-0.723812	0.605495	1.51764e-43	1.84709e-42
4930486L24Rik	4.07575	0.147445	4.72824	26.5058	1.51972e-43	1.84804e-42
Snrk	4.52858	9.31241	-1.0831	0.472015	1.55639e-43	1.89103e-42
Enpp4	10.8989	4.92756	1.10209	2.14665	1.88467e-43	2.28794e-42
Cmklr1	0.121161	1.45201	-3.61119	0.0818319	1.99554e-43	2.42046e-42
Lrp4	1.14573	4.18089	-1.909	0.266277	2.3571e-43	2.85659e-42
Syt13	3.06064	7.15213	-1.26735	0.415421	2.78153e-43	3.36808e-42
Mak16	103.666	66.8423	0.590232	1.50549	3.06778e-43	3.71154e-42
Lphn2	15.8631	25.6451	-0.735861	0.60046	3.11793e-43	3.76902e-42
Angptl7	4.11774	0.514791	2.94987	7.72681	3.46301e-43	4.18261e-42
Crabp1	264.919	396.272	-0.623831	0.648945	3.81865e-43	4.60824e-42
Fam169b	0.0325385	1.22629	-5.22905	0.0266624	3.82687e-43	4.61426e-42
Clca3a1	2.07955	0.231959	3.1128	8.65061	3.94129e-43	4.74821e-42
Tmem198b	6.58722	15.1497	-1.24379	0.422262	4.10699e-43	4.94364e-42
Arf2	29.439	47.4264	-0.73091	0.602524	4.50838e-43	5.42223e-42
Ergic2	31.4661	19.2043	0.669628	1.59066	4.53276e-43	5.44695e-42
Rps18	988.043	1416.8	-0.562871	0.676954	4.557e-43	5.47147e-42
Map3k9	1.71468	0.140081	3.56624	11.8453	4.85368e-43	5.82278e-42
Fnbp1l	22.1594	13.5682	0.664799	1.58535	5.6531e-43	6.77611e-42
Vps4a	27.5276	43.9005	-0.716193	0.608702	5.90277e-43	7.06943e-42
Cers2	104.421	67.6128	0.584118	1.49912	5.92738e-43	7.09294e-42
Runx3	5.08243	10.6666	-1.11231	0.462552	6.91672e-43	8.26989e-42
Cnn2	310.779	474.56	-0.653567	0.635707	7.50875e-43	8.97022e-42
Afap1l2	4.41874	1.44047	1.57366	2.97659	7.90083e-43	9.43071e-42
Rps4l	3.13582	0.06297	5.48655	44.8348	8.64167e-43	1.03064e-41
Lrig3	6.27208	12.4823	-1.03563	0.487803	9.09678e-43	1.08401e-41
Gng11	1.73289	9.72448	-2.52861	0.173305	9.4625e-43	1.12665e-41
Cdkn2b	28.2411	46.9446	-0.775974	0.583994	1.02515e-42	1.21957e-41
Ctnnal1	14.3488	6.68321	1.05913	2.08367	1.04488e-42	1.242e-41
Hmga1-rs1	231.653	143.77	0.645378	1.56415	1.05559e-42	1.25369e-41
Megf10	0.607072	0.0105146	5.72185	52.7773	1.10192e-42	1.30763e-41
Ext2	34.852	51.8516	-0.616034	0.652462	1.22881e-42	1.45699e-41
Slc5a3	8.02327	13.338	-0.776173	0.583914	1.49155e-42	1.76705e-41
Abhd14b	7.05319	17.0144	-1.31252	0.402617	1.49383e-42	1.76827e-41
Cct7	245.659	162.272	0.555389	1.46957	1.49526e-42	1.76851e-41
Tmsb4x	996.594	624.391	0.631582	1.54926	2.08276e-42	2.46132e-41
Dhrs1	18.776	34.6384	-0.926069	0.52629	2.13032e-42	2.51543e-41
Ppl	3.4271	0.885912	1.90761	3.75186	2.23661e-42	2.63875e-41
Tars	99.2964	143.435	-0.573402	0.67203	2.26229e-42	2.66684e-41
Eomes	0.782784	3.89413	-2.35679	0.195225	2.41128e-42	2.84012e-41
Eda	1.56879	4.42148	-1.5379	0.344388	2.52386e-42	2.97028e-41
Srebf1	32.0723	19.7188	0.65887	1.57885	2.89566e-42	3.40503e-41
Ddx56	39.401	24.5739	0.638248	1.55644	3.20512e-42	3.76582e-41
Cd2ap	48.8663	31.0645	0.610714	1.52701	3.38215e-42	3.97052e-41
Has1	2.09086	0.0957472	4.3767	20.7739	3.38492e-42	3.97052e-41
Fblim1	12.047	21.7732	-0.89669	0.537118	3.64011e-42	4.26635e-41
Mettl16	37.1324	22.2745	0.694317	1.61812	3.64852e-42	4.2727e-41
2510009E07Rik	0.79566	3.01727	-1.96386	0.256341	3.73625e-42	4.37185e-41
Bag5	11.2258	22.9206	-1.07258	0.475468	4.23882e-42	4.95584e-41
Slc18b1	2.92005	7.8988	-1.47773	0.359052	5.46301e-42	6.38187e-41
Nabp2	45.8217	78.1234	-0.812581	0.569362	5.77917e-42	6.74568e-41
Idh1	19.9934	34.1766	-0.816191	0.56794	5.92518e-42	6.91045e-41
Ebf3	1.74842	0.247343	2.77458	6.84277	6.82183e-42	7.94969e-41
Zmynd8	22.2005	33.1619	-0.621771	0.649873	7.43788e-42	8.66051e-41
Bhlhe22	1.4381	0.0566957	4.59347	24.142	7.713e-42	8.97352e-41
Twist2	22.004	40.9878	-0.940231	0.521149	7.7695e-42	9.03189e-41
Glce	6.96113	13.4107	-0.989033	0.503815	1.01192e-41	1.17537e-40
Dst	14.1393	20.9708	-0.611521	0.654506	1.09153e-41	1.26681e-40
Ankrd46	19.7505	32.4826	-0.760577	0.59026	1.27919e-41	1.4834e-40
Gpi1	133.916	88.8976	0.548243	1.4623	1.65741e-41	1.92044e-40
Socs3	16.5475	7.26194	1.14541	2.21208	1.67053e-41	1.93406e-40
Klhl9	15.0124	24.4713	-0.747905	0.595468	1.80839e-41	2.09198e-40
Smyd5	43.3718	25.2928	0.735134	1.66455	1.83958e-41	2.12633e-40
Mon1b	5.4806	10.0234	-0.913876	0.530757	2.31563e-41	2.67442e-40
Elac2	35.0889	20.6825	0.719584	1.64671	2.55016e-41	2.9429e-40
Fkbp5	18.1486	9.22498	0.933225	1.90954	2.58229e-41	2.97757e-40
Celf4	5.22237	1.87297	1.43591	2.70552	2.86332e-41	3.29895e-40
Cacna1a	0.558038	2.18455	-2.01097	0.248106	2.93947e-41	3.38395e-40
Rnf44	36.6185	23.0852	0.622814	1.53988	3.12265e-41	3.59193e-40
Acsl3	21.632	12.6099	0.735754	1.66527	3.28987e-41	3.78122e-40
Galk1	66.1192	38.8412	0.724638	1.65249	3.55615e-41	4.08398e-40
Gabre	1.64007	0.0757009	4.37152	20.6994	4.01465e-41	4.60683e-40
Ccdc109b	10.8152	3.08065	1.76781	3.40537	4.49137e-41	5.14972e-40
Hspb6	20.2492	37.6275	-0.936459	0.522514	5.18979e-41	5.94573e-40
Igsf9	2.64617	0.54553	2.23389	4.70402	5.21833e-41	5.97362e-40
Selt	85.4191	56.7362	0.547424	1.46147	5.81165e-41	6.64748e-40
Tgfbi	18.6095	4.65096	1.95694	3.88236	6.04679e-41	6.91089e-40
Gmps	47.2195	28.4755	0.686782	1.60969	6.23757e-41	7.12323e-40
Nup85	83.9343	52.5367	0.633201	1.551	6.85784e-41	7.8253e-40
Msx1	5.53997	0.69147	2.95454	7.75186	7.44935e-41	8.49345e-40
H2-M3	5.05129	0.966452	2.33994	5.06282	7.8811e-41	8.97853e-40
Plod2	15.4554	6.59213	1.1865	2.276	8.54175e-41	9.72341e-40
Alpl	2.15235	0.0163186	6.90534	119.871	9.83146e-41	1.11826e-39
Ddx50	32.6777	52.2438	-0.719778	0.607191	1.14902e-40	1.30589e-39
Trim6	0.728305	0.0211144	5.00886	32.1972	1.17132e-40	1.33017e-39
B4galt4	9.7279	3.66497	1.36551	2.57667	1.29074e-40	1.46462e-39
Lrba	1.1784	2.88353	-1.33332	0.396855	1.34364e-40	1.52344e-39
Slc16a1	35.9466	22.24	0.649775	1.56892	1.40586e-40	1.59272e-39
Slc25a30	30.1608	15.4623	0.920874	1.89326	1.72172e-40	1.949e-39
Rgs3	2.09376	5.75081	-1.50002	0.353548	1.75674e-40	1.98707e-39
Dgke	3.46296	1.09675	1.61473	3.06254	1.80476e-40	2.03977e-39
Arhgap1	72.833	48.1003	0.555715	1.4699	1.89487e-40	2.13991e-39
Cacna2d1	8.6182	4.58995	0.865809	1.82236	1.90273e-40	2.14709e-39
Fuom	2.13169	0.262157	2.97359	7.85487	2.27129e-40	2.56095e-39
Gja1	76.3346	110.341	-0.574394	0.671568	2.44796e-40	2.75798e-39
Jph4	0.0943664	1.14323	-3.6241	0.081103	2.73623e-40	3.08031e-39
Dlk1	7.37282	1.20694	2.56701	5.92578	3.14663e-40	3.53952e-39
Jade2	12.4346	6.88532	0.810056	1.75328	3.18224e-40	3.57676e-39
Dok4	3.28761	8.49175	-1.41155	0.375907	3.22506e-40	3.62203e-39
Urgcp	11.7096	6.62704	0.778264	1.71507	3.70568e-40	4.15853e-39
Iars2	32.4048	19.748	0.671509	1.59274	4.1686e-40	4.67434e-39
Dusp9	6.14026	1.97644	1.59167	3.01397	4.5875e-40	5.14002e-39
Zswim6	4.00179	1.39955	1.4716	2.77329	4.62037e-40	5.17278e-39
Pcdhb22	0.796494	3.85016	-2.31454	0.201026	4.73277e-40	5.29446e-39
Tubb2b	36.0372	19.3551	0.853835	1.8073	4.79044e-40	5.35477e-39
Rin3	2.4986	6.20918	-1.35557	0.390779	5.50479e-40	6.14845e-39
Creb3l2	20.6723	10.9558	0.873134	1.83164	5.95732e-40	6.64869e-39
Zbtb8a	1.54974	5.46791	-1.8605	0.275381	6.04872e-40	6.74541e-39
Rassf6	0.255048	3.09827	-3.6398	0.0802251	9.15581e-40	1.02024e-38
Kctd20	26.2199	40.8666	-0.683122	0.622816	1.21488e-39	1.3527e-38
Calcrl	1.47505	0.226678	2.6536	6.29237	1.32378e-39	1.4728e-38
Copz2	12.4074	30.3205	-1.3318	0.397273	1.3902e-39	1.54548e-38
Ffar4	1.89788	0.0143421	6.75326	107.878	1.44585e-39	1.6061e-38
Klhdc8a	8.92549	4.10102	1.07909	2.1127	1.52509e-39	1.6928e-38
Runx1t1	1.72989	4.50941	-1.42514	0.372383	1.58629e-39	1.75936e-38
Fam210b	5.97514	2.31022	1.32741	2.50951	1.63326e-39	1.81005e-38
Msto1	36.5205	20.3994	0.797075	1.73757	1.69756e-39	1.87985e-38
Gtf2ird1	15.7743	8.87007	0.787452	1.72602	1.74298e-39	1.92864e-38
Nolc1	123.079	82.1835	0.539837	1.45381	1.85388e-39	2.04977e-38
Hspa5	300.804	417.993	-0.517514	0.698574	1.95795e-39	2.16316e-38
Adamts16	0.00401918	0.458758	-6.60975	0.0102392	1.99016e-39	2.19704e-38
Fxr2	50.0432	31.9612	0.604038	1.51996	2.13395e-39	2.35396e-38
Paqr8	0.48089	2.09365	-2.16218	0.223419	2.2248e-39	2.45227e-38
Rps6ka1	7.87565	2.15843	1.82485	3.54271	2.52489e-39	2.78089e-38
Hs3st3b1	0.669067	2.51677	-1.95385	0.258126	2.59248e-39	2.85312e-38
Nmt2	46.2002	29.6111	0.598925	1.51459	2.73354e-39	3.00605e-38
Chst7	3.12271	8.97241	-1.56547	0.337868	2.84072e-39	3.1215e-38
Golgb1	7.14691	10.7706	-0.634537	0.644147	3.00468e-39	3.29761e-38
Zdhhc2	9.77848	18.8528	-0.990019	0.503471	3.00561e-39	3.29761e-38
Plscr1	46.2643	25.9973	0.788761	1.72759	3.24751e-39	3.56027e-38
Wdr77	52.4912	31.0729	0.713585	1.63987	3.75547e-39	4.11398e-38
Dlgap2	0.0435081	0.890484	-4.36615	0.0484906	3.78207e-39	4.13994e-38
Lrrk2	5.7851	9.48313	-0.75585	0.592198	3.91708e-39	4.28444e-38
Wnt5a	7.16359	2.61987	1.40876	2.65508	4.43664e-39	4.849e-38
Cables1	0.945033	3.55681	-1.95285	0.258306	4.4741e-39	4.88619e-38
Bdh1	2.93982	0.247853	3.51713	11.4488	4.60971e-39	5.03044e-38
C1rb	4.69015	13.6336	-1.58171	0.334085	4.70368e-39	5.12906e-38
Tpm2	98.7557	143.83	-0.585359	0.666483	4.85803e-39	5.29333e-38
Psmd12	129.461	84.1339	0.578995	1.49381	5.09283e-39	5.54492e-38
Sept2	106.191	148.707	-0.528647	0.693205	5.59414e-39	6.08608e-38
Rab5b	25.2688	41.4668	-0.757432	0.591548	6.71359e-39	7.2984e-38
Nek9	13.474	21.151	-0.693399	0.618395	6.96142e-39	7.56206e-38
Phb2	247.479	163.086	0.558754	1.473	7.34551e-39	7.97321e-38
Gm13305	1.30777	4.71024	-1.88972	0.26986	8.57393e-39	9.29952e-38
Meis2	7.30922	12.7764	-0.848558	0.55534	9.0643e-39	9.82391e-38
Maml2	5.56287	9.873	-0.870483	0.546964	9.72713e-39	1.05343e-37
Appl1	10.8623	17.7227	-0.749041	0.594999	9.82276e-39	1.06298e-37
Gpc1	28.4068	47.0812	-0.77164	0.585751	1.00589e-38	1.08771e-37
Zfp605	2.82061	6.79721	-1.31134	0.402945	1.02044e-38	1.10261e-37
D930015E06Rik	11.8214	6.6131	0.794958	1.73503	1.12303e-38	1.21254e-37
Mgst1	34.2216	8.14216	2.028	4.0784	1.22479e-38	1.3214e-37
D330045A20Rik	0.93506	0.0266454	5.0281	32.6295	1.26424e-38	1.36293e-37
Mcpt8	2.93984	0.0481453	5.76868	54.5185	1.3151e-38	1.41669e-37
Arpc1b	332.337	202.726	0.670201	1.59129	1.39661e-38	1.50336e-37
Hoxc11	17.7634	36.0649	-1.06436	0.478185	1.49593e-38	1.60905e-37
3110039M20Rik	3.29969	0.0826002	5.20795	36.9615	1.57858e-38	1.69668e-37
Iqgap2	0.587254	0.0191947	4.84896	28.8192	1.86861e-38	2.00689e-37
Eif4e	92.7397	59.802	0.590069	1.50532	1.91284e-38	2.05285e-37
Hmga1	415.244	251.164	0.682592	1.60502	2.13672e-38	2.29138e-37
Nup205	59.8472	38.554	0.591624	1.50694	2.20349e-38	2.36121e-37
1700025G04Rik	5.21577	2.73683	0.887747	1.85028	2.28077e-38	2.44218e-37
Map2k4	34.47	21.4556	0.641184	1.55961	2.31658e-38	2.47867e-37
Fry	0.307282	0.014983	4.28363	19.4761	2.36777e-38	2.53155e-37
Msx2	0.243462	2.07168	-3.12114	0.114933	2.43107e-38	2.59727e-37
Raet1c	3.86696	12.7458	-1.76185	0.29487	2.80753e-38	2.99723e-37
Lama2	0.0573245	0.638859	-3.51034	0.0877568	2.86928e-38	3.06085e-37
Gm37013	24.681	38.2822	-0.676102	0.625854	3.28657e-38	3.50338e-37
Siglecg	5.3225	12.8103	-1.30989	0.403352	4.59463e-38	4.89407e-37
Hyi	4.62167	0.477285	3.22267	9.33511	4.97385e-38	5.29405e-37
Retsat	21.6453	10.6953	0.974215	1.96457	4.99335e-38	5.31084e-37
Phb	170.029	114.444	0.528267	1.4422	5.24309e-38	5.5723e-37
Cdh26	0.125262	1.52414	-3.63869	0.080287	5.67865e-38	6.03071e-37
Stac2	5.87922	14.0478	-1.29931	0.406321	5.71062e-38	6.06015e-37
Atp6v1f	119.284	61.6775	0.908498	1.87709	6.14068e-38	6.51168e-37
Chrnb1	6.48744	1.52095	2.04917	4.13867	6.90869e-38	7.32064e-37
Ralgapa1	5.65153	9.40842	-0.778032	0.583162	8.1457e-38	8.62501e-37
Col16a1	14.6288	22.4032	-0.657739	0.633871	8.34468e-38	8.82913e-37
Gli1	0.229879	1.60871	-2.84512	0.139166	1.07323e-37	1.1347e-36
Zfp422	7.92475	3.39779	1.17866	2.26366	1.19973e-37	1.2675e-36
Vps13d	2.46412	4.10278	-0.778389	0.583017	1.30608e-37	1.37884e-36
Rap2b	10.2753	4.82028	1.04917	2.06934	1.32668e-37	1.39954e-36
Gda	3.21971	0.365146	3.09279	8.53143	1.35158e-37	1.42476e-36
Eva1c	7.10116	2.37961	1.53391	2.89569	1.3746e-37	1.44795e-36
Slc3a2	80.0268	124.936	-0.685372	0.621845	1.61398e-37	1.69885e-36
Tnfaip6	3.26032	0.337797	3.21569	9.29005	1.79308e-37	1.88597e-36
Ptprj	7.50577	3.47997	1.06584	2.09339	1.85627e-37	1.951e-36
C1qbp	234.827	156.643	0.54133	1.45531	1.89563e-37	1.9909e-36
Eif4a1	953.932	653.157	0.503608	1.41776	2.26698e-37	2.37916e-36
Gemin4	18.3085	10.4607	0.764599	1.6989	2.29792e-37	2.40986e-36
Mrpl38	59.0026	31.4111	0.866888	1.82372	2.52906e-37	2.6503e-36
Fam171a1	21.6877	12.225	0.784241	1.72219	2.60472e-37	2.72759e-36
Sh3tc2	1.12725	0.0845454	3.68601	12.8706	2.7893e-37	2.91873e-36
Cbx3	185.119	123.121	0.545518	1.45954	2.82048e-37	2.94919e-36
Nab1	25.3166	15.0129	0.710907	1.63683	2.97462e-37	3.10808e-36
C77080	10.4333	4.41612	1.19709	2.29277	3.11922e-37	3.25678e-36
Map3k4	8.495	13.6019	-0.722074	0.606225	3.22597e-37	3.36578e-36
Kcnq5	0.957237	0.0808473	3.50871	11.3822	5.66226e-37	5.90333e-36
Dhrs3	1.39867	11.5295	-3.08199	0.118094	5.93167e-37	6.17969e-36
Ebf2	0.469716	0.0110159	5.30086	39.4201	6.05586e-37	6.30446e-36
Ifitm2	175.832	267.419	-0.64778	0.638262	6.36026e-37	6.61653e-36
C2	0.908017	0.0151124	5.73192	53.147	6.59757e-37	6.85839e-36
Ptchd1	0.969404	0.142465	2.71841	6.58148	6.76802e-37	7.03045e-36
Gng8	0.672235	6.13064	-3.22419	0.10701	7.56269e-37	7.85022e-36
Seh1l	50.8442	33.1479	0.574289	1.48894	8.99118e-37	9.32622e-36
Itih2	6.2336	1.35616	2.15621	4.45744	1.00508e-36	1.04178e-35
Thap2	4.90449	9.85924	-1.05019	0.482904	1.00911e-36	1.04519e-35
Tspan11	5.13002	1.24196	2.0016	4.00445	1.02898e-36	1.06499e-35
P3h2	3.28841	0.746826	2.09344	4.26764	1.06954e-36	1.10617e-35
Mmp16	3.10587	0.950736	1.66385	3.16861	1.11181e-36	1.14906e-35
Sqrdl	17.3813	32.9982	-0.967538	0.511378	1.2332e-36	1.27359e-35
9930111J21Rik1	1.15656	4.52695	-2.01128	0.248053	1.35508e-36	1.39845e-35
Echdc1	12.782	22.146	-0.835984	0.560201	1.58714e-36	1.63675e-35
Sesn2	3.51374	10.4456	-1.61451	0.326575	1.61439e-36	1.66365e-35
Znrf2	10.8498	4.47076	1.23624	2.35583	1.63264e-36	1.68124e-35
Lgalsl	10.1508	19.693	-0.998856	0.500396	1.76661e-36	1.81788e-35
Hoxa3	3.53676	0.672587	2.34969	5.09716	1.77655e-36	1.82679e-35
Cd81	90.0589	131.89	-0.593221	0.662861	1.81077e-36	1.86064e-35
Rbpj	56.2074	37.2241	0.551754	1.46587	1.83314e-36	1.88227e-35
Adat2	8.63697	17.7321	-1.08042	0.472891	1.89732e-36	1.94676e-35
Swap70	14.1771	23.1028	-0.747356	0.595694	1.95145e-36	2.00087e-35
Ncoa1	1.50351	3.4245	-1.23011	0.426285	2.03823e-36	2.08834e-35
Nova1	0.321216	0.00283787	6.52031	91.793	2.05126e-36	2.10018e-35
Eno1	218.86	308.539	-0.538389	0.68854	2.08529e-36	2.13349e-35
Ccm2	40.5365	23.3564	0.752433	1.68463	2.1008e-36	2.14782e-35
D930048N14Rik	1.84519	0.242898	2.87524	7.33726	2.22682e-36	2.27503e-35
Pdk3	33.9788	19.6217	0.749296	1.68097	2.31932e-36	2.36783e-35
Vta1	31.8698	53.1035	-0.779492	0.582572	2.38396e-36	2.43209e-35
Lrp2	0.639538	0.0935712	2.72657	6.61882	2.41197e-36	2.45889e-35
Atf6	17.843	11.2762	0.619201	1.53602	2.7951e-36	2.84744e-35
Nlrp2	7.37	0.524524	3.76515	13.5964	2.87441e-36	2.92615e-35
Lrp6	15.5394	9.6042	0.651474	1.57077	3.05745e-36	3.11027e-35
Il18rap	5.06209	2.07702	1.24172	2.36481	3.21839e-36	3.27164e-35
Ptbp2	16.7445	8.72698	0.89695	1.86212	3.32313e-36	3.37571e-35
Arpc4	72.9182	44.5518	0.667976	1.58884	3.51655e-36	3.56965e-35
Crmp1	1.82029	0.152901	3.52282	11.4941	3.5617e-36	3.61291e-35
Appl2	4.63161	12.7741	-1.50618	0.352043	3.8304e-36	3.8827e-35
Shroom1	2.16838	0.452712	2.21525	4.64361	4.33206e-36	4.3881e-35
Rps6ka4	41.3228	26.4046	0.603286	1.51917	4.75777e-36	4.81589e-35
Amotl2	75.5226	104.603	-0.512776	0.700873	5.01434e-36	5.072e-35
Ap1s2	20.0234	35.9878	-0.888735	0.540087	5.03152e-36	5.08576e-35
Zfp521	2.69146	5.95193	-1.1874	0.439092	5.24914e-36	5.30196e-35
Vps37b	27.6851	15.0734	0.834304	1.783	5.46739e-36	5.5185e-35
Krt19	35.1482	14.7594	1.20907	2.31188	5.7374e-36	5.78694e-35
Rbl2	6.9256	12.0647	-0.843391	0.557332	6.03002e-36	6.07779e-35
Nrp2	31.3647	44.1436	-0.535934	0.689712	6.3637e-36	6.40958e-35
Cnbp	280.445	191.551	0.50715	1.42124	6.8034e-36	6.8476e-35
Lonp1	53.7458	77.0166	-0.561865	0.677426	7.30854e-36	7.35083e-35
Hecw2	0.570306	1.50821	-1.44512	0.367261	7.67887e-36	7.71786e-35
Cdkn2a	247.533	159.47	0.591457	1.50677	9.10212e-36	9.14189e-35
Ppfibp1	63.8593	42.5364	0.543289	1.45729	9.93939e-36	9.97579e-35
Ubr7	16.9329	26.6016	-0.694516	0.617916	1.01066e-35	1.01364e-34
Dhrs7	6.41379	15.8329	-1.34585	0.393421	1.04695e-35	1.04931e-34
Vdac1	236.226	162.064	0.500789	1.41499	1.07711e-35	1.07878e-34
Lrrn4	2.67929	0.26468	3.29523	9.81663	1.23143e-35	1.23247e-34
Akap13	4.30405	6.56682	-0.652311	0.63626	1.39959e-35	1.39979e-34
Tmem254b	8.91539	18.4467	-1.09166	0.469222	1.49674e-35	1.4959e-34
Fndc1	0.010259	0.456507	-5.4138	0.0234576	1.6531e-35	1.65102e-34
Timp1	210.056	124.572	0.710756	1.63666	1.66344e-35	1.66018e-34
Mt3	4.29978	0	9.23607	603.025	1.711e-35	1.70645e-34
Fxr1	84.0901	52.7649	0.629422	1.54695	1.7721e-35	1.76615e-34
Naa25	39.8599	24.6528	0.650337	1.56953	2.20139e-35	2.19246e-34
Eml2	4.39177	0.709738	2.58513	6.00069	2.2679e-35	2.25713e-34
Ptpn13	8.89556	4.9603	0.79985	1.74092	2.34272e-35	2.32997e-34
Ddx51	11.5157	6.50177	0.781651	1.7191	2.42793e-35	2.41303e-34
Foxq1	4.83816	1.39596	1.74891	3.36105	2.59192e-35	2.57422e-34
Gpn3	38.4018	21.449	0.797261	1.7378	2.67976e-35	2.65961e-34
Gldc	1.63453	0.184879	3.0898	8.51377	2.74918e-35	2.72661e-34
Gpr124	27.9652	40.4642	-0.575871	0.670881	2.85795e-35	2.83252e-34
Kif1b	16.8848	25.8608	-0.657883	0.633808	2.90009e-35	2.87228e-34
Helq	14.8135	7.77668	0.886972	1.84929	3.09494e-35	3.06313e-34
Fubp1	31.0452	20.4884	0.556673	1.47087	3.15888e-35	3.12424e-34
Pla2g6	10.9227	19.93	-0.91044	0.532023	3.2341e-35	3.19642e-34
Fdft1	28.6003	43.5125	-0.648259	0.63805	3.24906e-35	3.20898e-34
Hbs1l	39.6533	59.0457	-0.617217	0.651927	3.45517e-35	3.41019e-34
Ubqln4	47.6828	31.9063	0.536795	1.45075	3.72544e-35	3.67439e-34
AA414768	1.50453	0	9.35411	654.435	3.91422e-35	3.85791e-34
C530008M17Rik	1.65576	3.87039	-1.26807	0.415214	4.12525e-35	4.06311e-34
Pakap	0.272324	1.02542	-1.95372	0.258149	4.3159e-35	4.24794e-34
Fam3c	44.9498	26.978	0.693536	1.61724	4.38039e-35	4.30844e-34
Cnn1	8.65598	21.592	-1.36175	0.389109	5.01306e-35	4.92731e-34
Ap1ar	30.8783	18.1943	0.720092	1.64729	5.64527e-35	5.54489e-34
Cnksr3	6.15746	11.7254	-0.971668	0.509916	6.11291e-35	6.00008e-34
Pex3	17.2577	33.5076	-1.00023	0.499919	6.12895e-35	6.01168e-34
Mest	0.711039	3.51088	-2.34434	0.196917	6.51715e-35	6.38806e-34
Nek1	5.44486	9.69438	-0.874934	0.545279	6.8362e-35	6.69618e-34
Kctd15	1.18942	4.61962	-1.99937	0.250109	6.92047e-35	6.77407e-34
Lypd6	2.71019	0.583273	2.17244	4.50784	7.35065e-35	7.19021e-34
Usp36	18.7304	11.4169	0.671216	1.59241	7.61029e-35	7.43909e-34
G3bp2	61.1316	41.726	0.508058	1.42213	7.66329e-35	7.48576e-34
Fabp5	359.495	207.046	0.753045	1.68535	8.12728e-35	7.93356e-34
Vstm5	1.16644	0.0202946	5.68168	51.3281	8.243e-35	8.04102e-34
Jag2	1.2509	0.0913495	3.7152	13.1337	9.23783e-35	9.00531e-34
Dlk2	25.188	11.1984	1.12626	2.18293	1.00547e-34	9.79489e-34
Man2a1	51.0433	89.6811	-0.855823	0.55255	1.02957e-34	1.00228e-33
Akip1	10.6747	2.76463	1.9063	3.74846	1.03908e-34	1.01085e-33
Hoxc10	5.58053	13.1876	-1.28277	0.411004	1.07598e-34	1.04604e-33
Dnm3os	3.33749	7.32475	-1.17656	0.442405	1.11106e-34	1.0794e-33
Aagab	13.7576	22.2369	-0.735635	0.600554	1.1579e-34	1.12351e-33
Maf	10.4298	5.19229	0.963216	1.94965	1.15804e-34	1.12351e-33
Dag1	35.5725	51.3352	-0.571903	0.672729	1.22916e-34	1.1917e-33
Pi4k2b	13.902	7.31352	0.883546	1.8449	1.42955e-34	1.38504e-33
Nuak2	2.42219	7.05717	-1.58537	0.333239	1.51384e-34	1.46571e-33
Serinc1	106.005	149.556	-0.539388	0.688063	1.7289e-34	1.6728e-33
Tab2	32.3357	45.4429	-0.53374	0.690762	1.74237e-34	1.68468e-33
Edn2	2.12242	0.0321199	5.86912	58.4494	1.78263e-34	1.72245e-33
Hook3	10.624	15.6833	-0.604766	0.657578	1.85073e-34	1.78703e-33
Dusp16	12.6961	6.94682	0.827292	1.77435	1.94757e-34	1.87926e-33
Rapgef2	8.08292	4.60599	0.768502	1.7035	2.00847e-34	1.93672e-33
Larp1	69.6552	47.3392	0.514333	1.42833	2.33452e-34	2.2496e-33
Aamp	96.9087	63.106	0.575896	1.4906	2.34215e-34	2.25543e-33
P4ha2	27.6136	45.2022	-0.753786	0.593045	2.37031e-34	2.28101e-33
Shank2	1.66141	3.68985	-1.19348	0.437247	2.37606e-34	2.28499e-33
Tmem199	42.8971	24.2479	0.780096	1.71724	2.38167e-34	2.28884e-33
Capza2	138.847	94.4456	0.513139	1.42715	2.49558e-34	2.39669e-33
Csrnp1	7.83047	3.36257	1.17678	2.26072	2.57326e-34	2.46963e-33
Ndnf	4.01521	0.515292	2.91677	7.55155	2.6663e-34	2.55721e-33
Stc2	7.10426	14.721	-1.09338	0.468662	2.78268e-34	2.66703e-33
Fignl2	0.699217	0.0453268	3.87671	14.6894	2.85167e-34	2.73131e-33
Tspan31	50.5205	74.9957	-0.612659	0.65399	2.90197e-34	2.77762e-33
Zdhhc15	1.81729	0.428011	2.04042	4.11367	2.96026e-34	2.83152e-33
Adk	57.3717	81.4855	-0.548999	0.683494	3.19461e-34	3.05363e-33
Junb	77.453	40.5618	0.89027	1.85352	3.25968e-34	3.11374e-33
Chac1	8.59015	18.8797	-1.17869	0.441752	3.30005e-34	3.15019e-33
Ddx39b	154.326	104.619	0.517957	1.43193	3.82707e-34	3.65083e-33
Slc20a1	55.8803	80.1417	-0.563056	0.676867	4.00551e-34	3.81849e-33
Dtx3	16.8011	31.163	-0.934033	0.523393	4.29115e-34	4.08807e-33
Foxm1	52.2615	35.2113	0.526907	1.44084	4.37879e-34	4.16877e-33
Eif3e	264.533	373.88	-0.541899	0.686866	4.87876e-34	4.64166e-33
Yars	39.5648	55.5053	-0.531256	0.691952	5.11908e-34	4.86706e-33
Adra1d	6.66661	16.3125	-1.33351	0.3968	5.85259e-34	5.56074e-33
Sptbn1	63.9297	88.592	-0.513505	0.700519	5.93176e-34	5.63221e-33
Iffo2	14.6824	8.61163	0.726985	1.65518	6.16073e-34	5.84572e-33
Ppp2r2b	0.696979	0	8.84603	460.173	6.25403e-34	5.9303e-33
Vps26a	59.6525	83.7756	-0.532737	0.691242	6.3236e-34	5.99228e-33
Masp1	9.4453	16.3924	-0.838083	0.559387	6.5568e-34	6.20914e-33
Mmp11	12.2377	22.4915	-0.920554	0.528306	6.63717e-34	6.28107e-33
Ftl1	1635.14	2420.2	-0.608724	0.655776	7.29317e-34	6.89729e-33
Psd3	2.19158	3.92586	-0.88372	0.541968	7.41055e-34	7.00365e-33
Gprc5a	34.7901	19.8002	0.770222	1.70553	8.11547e-34	7.66479e-33
Sumo2	456.508	316.246	0.486726	1.40126	8.73025e-34	8.23997e-33
Tmem2	7.11856	3.97679	0.797221	1.73775	9.44823e-34	8.91172e-33
Bok	23.0215	38.8378	-0.797436	0.575371	9.66691e-34	9.11196e-33
Fgfbp1	5.48035	0.955877	2.47229	5.54924	1.00346e-33	9.4523e-33
Snx1	30.9414	45.962	-0.613652	0.65354	1.02164e-33	9.61716e-33
Galnt7	17.4514	10.3493	0.710876	1.6368	1.0661e-33	1.00291e-32
Exd2	2.96355	6.5125	-1.17846	0.441823	1.12346e-33	1.05617e-32
Doc2b	0.902904	0.0728456	3.56434	11.8297	1.15806e-33	1.08799e-32
Calml4	1.14558	8.57784	-2.9442	0.129929	1.25854e-33	1.1816e-32
Xk	2.69657	0.832362	1.65162	3.14185	1.3651e-33	1.2808e-32
Dixdc1	1.62282	4.67268	-1.56821	0.337226	1.38004e-33	1.29397e-32
Grk5	2.44003	6.3799	-1.42894	0.371405	1.43045e-33	1.34035e-32
Tnfrsf11b	0.452144	2.31719	-2.39459	0.190176	1.43467e-33	1.34343e-32
Ndufa4	362.987	218.103	0.691925	1.61544	1.54957e-33	1.45006e-32
Nt5c	58.6147	32.3637	0.81405	1.75814	1.70473e-33	1.59421e-32
Rbms2	20.2981	29.9992	-0.606481	0.656797	1.71546e-33	1.6032e-32
Rasgrf2	0.555014	0.0500223	3.41573	10.6718	2.0632e-33	1.92692e-32
Pole4	44.1154	25.8197	0.729956	1.65859	2.18804e-33	2.04217e-32
Myl12b	113.048	71.1526	0.62504	1.54225	2.24807e-33	2.09683e-32
Zcchc3	9.71145	3.99627	1.23802	2.35875	2.47929e-33	2.31098e-32
Rrad	16.61	7.0667	1.19036	2.2821	2.48912e-33	2.31863e-32
Ppp3r1	80.7077	52.3064	0.582729	1.49768	2.55899e-33	2.38215e-32
Ngfrap1	166.667	106.328	0.605547	1.52156	2.82214e-33	2.6254e-32
Hspa4l	33.1863	20.908	0.623748	1.54087	3.17557e-33	2.95226e-32
Tspyl4	1.04974	3.66699	-1.84627	0.278111	3.22482e-33	2.9961e-32
Net1	28.7139	17.2496	0.692268	1.61582	3.22762e-33	2.99674e-32
Dact2	1.21798	5.27393	-2.1549	0.224548	3.24101e-33	3.00722e-32
Eftud2	102.749	66.9896	0.574226	1.48888	3.44001e-33	3.18978e-32
Pde4d	2.61329	4.92121	-0.95596	0.515498	3.51691e-33	3.25897e-32
Sema5a	3.28193	1.57812	1.01296	2.01805	4.05002e-33	3.75054e-32
Pno1	90.5489	58.2918	0.59245	1.5078	4.58499e-33	4.2432e-32
Cat	21.823	33.5977	-0.665459	0.630488	4.67221e-33	4.32111e-32
Tigit	8.44754	2.04271	2.00228	4.00633	4.88186e-33	4.51208e-32
Nisch	77.2033	103.795	-0.469879	0.722025	4.97566e-33	4.59579e-32
Grwd1	51.2767	31.0974	0.678791	1.6008	5.14159e-33	4.74598e-32
Heatr1	32.3599	20.969	0.583142	1.49811	5.23292e-33	4.82716e-32
Padi2	0.476957	0.0148427	4.89649	29.7846	5.26105e-33	4.84997e-32
Ralbp1	27.4175	38.4997	-0.53257	0.691322	5.49587e-33	5.06316e-32
Nnat	3.76136	0.461443	2.97249	7.8489	6.09801e-33	5.61427e-32
Hars	106.126	70.0374	0.556738	1.47094	6.23454e-33	5.73626e-32
Arhgap21	17.7651	25.4413	-0.560979	0.677842	6.32842e-33	5.81888e-32
Dctn2	87.69	120.044	-0.495943	0.709098	6.47984e-33	5.95427e-32
Serf2	54.8978	81.7668	-0.617739	0.651692	6.56774e-33	6.03115e-32
Dtymk	133.819	81.8638	0.665943	1.58661	6.65407e-33	6.10649e-32
Stox2	1.70543	0.662972	1.31945	2.4957	7.38694e-33	6.77469e-32
Ttyh2	14.7059	7.27463	0.972822	1.96268	7.43249e-33	6.81208e-32
Hsdl2	5.09871	10.0006	-1.01465	0.494948	8.30598e-33	7.60777e-32
Flt1	6.7723	2.94903	1.15687	2.22974	8.61317e-33	7.88406e-32
Fcgrt	3.54978	11.4119	-1.72666	0.302151	8.88976e-33	8.13202e-32
Dnm2	28.4603	41.7535	-0.595798	0.661678	8.94465e-33	8.17698e-32
Emc1	10.4472	5.95933	0.767266	1.70204	1.16009e-32	1.05984e-31
Timp2	258.053	167.447	0.581261	1.49616	1.17452e-32	1.07235e-31
Bhlhe41	0.598634	1.91352	-1.71846	0.303873	1.20399e-32	1.09855e-31
Emp1	196.635	284.612	-0.576441	0.670616	1.29358e-32	1.17954e-31
Gys1	11.603	17.9431	-0.671731	0.627753	1.38968e-32	1.26635e-31
Hspa12b	4.66614	9.16014	-1.01597	0.494497	1.48679e-32	1.35397e-31
Tmtc2	0.597581	0.0286811	4.32051	19.9804	1.55405e-32	1.41433e-31
2410006H16Rik	102.815	209.365	-1.06886	0.476695	1.63303e-32	1.48526e-31
Fzd6	13.8882	7.53723	0.838728	1.78847	1.71859e-32	1.56208e-31
Zfp286	1.85	0.281011	2.67063	6.36708	1.8007e-32	1.63566e-31
Ostf1	24.7688	39.6729	-0.722348	0.60611	1.84549e-32	1.67528e-31
Lgals3	325.028	513.191	-0.701634	0.614875	1.84971e-32	1.67804e-31
Nsun2	81.0824	55.0995	0.514478	1.42848	1.98937e-32	1.8036e-31
Aldh2	73.4284	104.472	-0.55162	0.682253	2.00748e-32	1.81885e-31
Rnf150	6.68586	9.90482	-0.609831	0.655273	2.20769e-32	1.99898e-31
Lsm8	73.2316	40.8237	0.800174	1.74131	2.3725e-32	2.14685e-31
Ophn1	2.63464	6.20697	-1.27863	0.412187	2.4943e-32	2.25564e-31
Atg2b	6.29904	9.30649	-0.606017	0.657008	2.51726e-32	2.27495e-31
Tpd52l1	3.85918	0.356757	3.38111	10.4188	3.10518e-32	2.8045e-31
Wasl	92.5396	60.1503	0.578629	1.49343	3.38605e-32	3.05624e-31
Dpp8	15.4844	22.8037	-0.601348	0.659138	3.6838e-32	3.32288e-31
Lyar	107.783	71.2539	0.55424	1.46839	3.88247e-32	3.49987e-31
Dlg5	17.54	24.1955	-0.506975	0.703696	3.90284e-32	3.51601e-31
Nr4a1	13.7905	5.95019	1.16978	2.24977	5.09613e-32	4.58812e-31
Pcdhb18	0.184723	1.07388	-2.57528	0.167789	5.26526e-32	4.73741e-31
Laptm4a	135.689	194.483	-0.562223	0.677258	6.25517e-32	5.62452e-31
Cav1	135.523	213.466	-0.69805	0.616405	6.5164e-32	5.85572e-31
Epb4.1l1	30.3498	17.7487	0.731141	1.65995	6.68141e-32	6.00021e-31
Mon2	11.2374	15.9879	-0.551427	0.682345	6.85766e-32	6.15462e-31
Ivns1abp	68.9908	44.3625	0.5943	1.50974	7.10145e-32	6.36941e-31
Bcar1	67.4837	45.346	0.530757	1.44469	7.21349e-32	6.46583e-31
Zhx1	7.21252	12.5806	-0.845374	0.556566	7.56866e-32	6.77992e-31
Plxnb3	0.315051	0.00341981	6.27398	77.385	7.99086e-32	7.15362e-31
Gabarapl2	95.0617	57.2061	0.689655	1.6129	8.33941e-32	7.46097e-31
Pfas	16.7971	10.5138	0.633189	1.55099	8.49885e-32	7.59885e-31
Sec61a1	131.628	86.7993	0.557697	1.47192	8.77159e-32	7.83779e-31
Tmeff1	7.04933	14.2238	-1.05529	0.481202	9.51138e-32	8.49349e-31
Phyhd1	0.983617	5.09957	-2.41398	0.187637	1.06058e-31	9.46482e-31
Acot2	1.29815	4.62223	-1.87219	0.273158	1.11677e-31	9.9601e-31
Ddx54	37.9562	25.3381	0.540207	1.45418	1.12104e-31	9.99188e-31
Ptger2	0.484851	0	8.89607	476.414	1.13366e-31	1.00981e-30
Dfna5	1.51461	5.71785	-1.958	0.257385	1.16181e-31	1.03424e-30
Mex3a	7.42502	3.81855	0.916667	1.88775	1.28302e-31	1.14143e-30
Tra2a	91.1808	61.3738	0.528248	1.44218	1.3026e-31	1.15812e-30
Pik3c2a	10.8351	16.085	-0.612863	0.653898	1.53886e-31	1.36732e-30
Zfp385a	10.1575	4.13427	1.25416	2.38529	1.76736e-31	1.56937e-30
Cdk16	40.6874	57.026	-0.529819	0.692642	1.88928e-31	1.67659e-30
Fgf10	13.314	20.9854	-0.699308	0.615867	1.91166e-31	1.69539e-30
Grk6	49.0408	31.6775	0.587778	1.50293	1.98289e-31	1.75748e-30
Paox	12.7001	4.83583	1.35037	2.54977	2.07042e-31	1.83391e-30
Psmc5	147.776	98.0138	0.549592	1.46367	2.13568e-31	1.89054e-30
Tbrg1	53.5455	82.7266	-0.670471	0.628302	2.24222e-31	1.98362e-30
Rbp2	3.49468	0.0146961	7.37299	165.765	2.37849e-31	2.10287e-30
Isy1	50.5872	29.5489	0.732563	1.66159	2.84465e-31	2.51345e-30
Cstf2	37.9847	24.9683	0.56234	1.47666	3.08313e-31	2.72248e-30
Ces1g	1.14277	5.13276	-2.20818	0.216407	3.16528e-31	2.79329e-30
Gng7	2.08275	5.16407	-1.35194	0.391765	3.46122e-31	3.05255e-30
Gmpr	14.5187	5.54169	1.34662	2.54315	3.57559e-31	3.15147e-30
Fam216a	62.652	34.9184	0.800212	1.74136	3.71289e-31	3.27047e-30
Eef2	1157.4	1531.35	-0.4467	0.733719	3.78561e-31	3.33246e-30
Anp32a	49.7181	73.2688	-0.602284	0.65871	3.87745e-31	3.4112e-30
St3gal1	14.0672	7.96093	0.778316	1.71513	4.69841e-31	4.13089e-30
C1galt1	13.3755	6.15077	1.07824	2.11146	5.06058e-31	4.44657e-30
H2-L	13.4415	30.2339	-1.21216	0.431621	5.07548e-31	4.45692e-30
Zeb2	5.8967	9.36595	-0.710492	0.611112	5.47914e-31	4.80842e-30
St6gal1	2.87012	0.931196	1.58008	2.98986	6.18857e-31	5.42766e-30
Camk2g	17.7567	26.375	-0.613477	0.65362	6.4373e-31	5.64234e-30
Fam132b	3.09661	0.499794	2.5849	5.99976	6.55808e-31	5.74467e-30
Tbpl1	15.0612	24.0022	-0.715093	0.609166	7.29797e-31	6.38886e-30
Cxcl10	7.89749	1.8802	2.02495	4.06978	7.54032e-31	6.59697e-30
Pja1	51.0456	31.1068	0.671523	1.59275	8.10644e-31	7.08791e-30
Plcd1	3.11723	8.17026	-1.43194	0.370632	8.44111e-31	7.37601e-30
Foxf2	16.209	7.27764	1.11241	2.16206	8.6953e-31	7.59347e-30
Kdm3a	19.7646	12.457	0.623167	1.54025	8.86918e-31	7.74057e-30
Acaa2	20.7449	40.8654	-1.02084	0.49283	9.6957e-31	8.45674e-30
Dhfr	24.5616	16.0885	0.567397	1.48185	1.05203e-30	9.17037e-30
Rorb	0.568612	0.066804	3.04163	8.23422	1.10508e-30	9.6269e-30
Camk2a	0.165071	1.09505	-2.76587	0.147025	1.10617e-30	9.63047e-30
Maoa	47.3776	67.514	-0.553734	0.681254	1.1154e-30	9.70495e-30
Tubb6	236.698	164.394	0.483034	1.39768	1.22567e-30	1.06578e-29
Ephb3	7.25835	12.7431	-0.854857	0.55292	1.34513e-30	1.16895e-29
Arhgef10l	5.81106	10.5109	-0.897553	0.536796	1.35069e-30	1.17307e-29
Cplx2	0.879707	3.46313	-2.0187	0.24678	1.35209e-30	1.17357e-29
Mnat1	12.5141	22.5877	-0.894794	0.537824	1.45946e-30	1.26599e-29
Hoxa10	9.393	17.5856	-0.94753	0.51852	1.48032e-30	1.28331e-29
Casp3	77.3995	48.4093	0.634035	1.5519	1.56445e-30	1.35541e-29
Edil3	0.612174	0.0697863	3.07752	8.44159	1.72785e-30	1.49607e-29
Slc45a3	1.46887	0.234055	2.60239	6.07291	1.93135e-30	1.67126e-29
Rps12	1552.43	2207.02	-0.550567	0.682752	1.97644e-30	1.70923e-29
Skp1a	201.108	137.151	0.509389	1.42345	2.013e-30	1.7398e-29
Cpne3	15.0639	21.2899	-0.541978	0.686829	2.10134e-30	1.81504e-29
Map3k6	1.60932	0.267292	2.54452	5.83416	2.17251e-30	1.87539e-29
Ptp4a3	3.04105	6.88331	-1.22055	0.429118	2.20656e-30	1.90362e-29
Myb	0.613151	0	9.09533	546.974	2.22084e-30	1.91479e-29
Ly75	17.0193	10.4524	0.660377	1.5805	2.3476e-30	2.02286e-29
Prss35	0.257362	1.87173	-2.8994	0.134028	2.70862e-30	2.33252e-29
Itga5	45.1707	64.5119	-0.557091	0.679671	3.09533e-30	2.66393e-29
Gcnt2	10.141	3.32298	1.56698	2.96285	3.40598e-30	2.92951e-29
Arhgef40	16.4768	23.8454	-0.576092	0.670778	3.42935e-30	2.94784e-29
Krt15	1.40057	0.0463299	4.80033	27.8639	3.43746e-30	2.95302e-29
Csf2ra	1.23978	0.0706533	4.05171	16.5839	3.61576e-30	3.10433e-29
Mfap2	0.432424	5.07565	-3.58613	0.083266	4.09526e-30	3.51389e-29
Cpq	5.2731	10.8731	-1.08673	0.470828	4.37392e-30	3.75073e-29
Pcdhb21	0.16602	2.74532	-4.08542	0.058907	4.39865e-30	3.76967e-29
Dab2ip	8.18292	13.1829	-0.730951	0.602507	4.56812e-30	3.91255e-29
Myadm	88.5848	130.172	-0.598278	0.660542	4.83146e-30	4.13561e-29
Tcf3	37.998	52.2289	-0.501772	0.706239	4.85738e-30	4.1553e-29
Lppr2	2.3064	5.52245	-1.30222	0.405501	5.05318e-30	4.32021e-29
Plxna2	2.20038	4.42982	-1.05198	0.482306	5.4524e-30	4.65873e-29
Gjb4	6.22614	1.83078	1.72243	3.29991	5.95223e-30	5.08275e-29
Mycn	1.31044	0.0550132	4.51268	22.8272	6.33331e-30	5.40493e-29
Eepd1	0.583228	2.52338	-2.15278	0.224879	6.63331e-30	5.65756e-29
Cdc42ep5	4.6755	13.3293	-1.55387	0.340596	7.29715e-30	6.22004e-29
Kalrn	2.06039	0.802482	1.31733	2.49204	7.47084e-30	6.36428e-29
Cfap74	2.35997	0.507334	2.17141	4.50464	7.8262e-30	6.66302e-29
Ivl	1.21236	0.0209697	5.68998	51.6242	7.91786e-30	6.73703e-29
Snx27	25.8899	17.5426	0.51875	1.43271	8.24188e-30	7.00855e-29
Plek2	1.60861	0.064217	4.54204	23.2965	8.48356e-30	7.20976e-29
Eml5	1.53483	0.591529	1.33156	2.51675	8.80213e-30	7.47604e-29
Tead3	11.5777	19.7661	-0.814637	0.568551	9.08782e-30	7.71409e-29
Klc4	2.32204	6.63397	-1.55623	0.340039	9.36095e-30	7.94121e-29
Cx3cl1	22.2683	10.879	0.990511	1.98689	9.60527e-30	8.14363e-29
Acot1	6.92492	2.07888	1.69281	3.23286	9.65853e-30	8.18391e-29
Lgals9	28.7076	49.1358	-0.818236	0.567135	1.01013e-29	8.55403e-29
Tmem150a	16.3164	6.8247	1.21465	2.32085	1.09056e-29	9.22962e-29
Cdk19	5.73504	10.2273	-0.877447	0.54433	1.12396e-29	9.50663e-29
Ubn1	10.7521	15.5864	-0.578619	0.669604	1.13314e-29	9.57861e-29
Smarcc2	28.1153	40.1975	-0.558547	0.678986	1.19644e-29	1.01077e-28
Acsbg1	2.78943	0.20115	3.74829	13.4384	1.22177e-29	1.03155e-28
Tspan6	2.11941	6.25404	-1.60248	0.329311	1.27614e-29	1.07682e-28
Pes1	87.7438	60.6384	0.49015	1.40459	1.28122e-29	1.08047e-28
Lars	55.8657	81.294	-0.58385	0.667181	1.3157e-29	1.10889e-28
Psmd4	124.952	84.255	0.525626	1.43956	1.41267e-29	1.18992e-28
Pgs1	40.998	25.2248	0.657712	1.57758	1.55506e-29	1.30908e-28
Arhgap44	3.83715	1.23678	1.58945	3.00935	1.58235e-29	1.33127e-28
Raph1	16.0533	9.44191	0.72294	1.65054	1.59301e-29	1.33945e-28
Tnpo3	50.1032	33.6696	0.530558	1.44449	1.80538e-29	1.51711e-28
A730090H04Rik	1.15178	0.0242608	5.40632	42.4096	1.89043e-29	1.58765e-28
Mtus2	0.509915	0.0519636	3.23971	9.44602	1.96335e-29	1.64792e-28
Pdzd4	1.87164	4.38278	-1.26939	0.414836	2.02394e-29	1.69778e-28
Uaca	20.439	12.0498	0.719383	1.64648	2.0729e-29	1.73783e-28
Snx19	4.81831	8.1096	-0.79397	0.576755	2.0954e-29	1.75566e-28
Pkd1	9.07644	12.5172	-0.506532	0.703912	2.14702e-29	1.79785e-28
Tox3	0.618331	0	9.00862	515.067	2.2065e-29	1.84657e-28
Tnfaip8	12.3393	6.4536	0.89215	1.85594	2.24083e-29	1.87419e-28
8430419L09Rik	1.79816	4.30303	-1.30087	0.40588	2.2781e-29	1.90425e-28
Fam13b	24.0509	13.9933	0.738483	1.66842	2.48012e-29	2.0719e-28
R3hdm2	18.9691	27.1383	-0.55942	0.678575	2.51794e-29	2.10227e-28
Tomm40	68.3908	44.2882	0.584136	1.49914	2.54336e-29	2.12225e-28
Homer3	24.9888	14.255	0.76695	1.70167	2.57211e-29	2.14498e-28
Gdf6	1.75294	0.360972	2.23233	4.69891	2.60477e-29	2.17094e-28
Stk11	28.365	39.4257	-0.517866	0.698404	2.64954e-29	2.20697e-28
Rai14	41.6575	27.4502	0.558828	1.47307	2.67824e-29	2.22957e-28
Evi2a	2.9205	7.27273	-1.35878	0.389911	2.71298e-29	2.25717e-28
Ech1	16.3773	29.9294	-0.912755	0.53117	2.77443e-29	2.30695e-28
Cpne2	16.6931	27.479	-0.761665	0.589815	2.85713e-29	2.37433e-28
Ankrd52	27.6208	40.6271	-0.599526	0.659971	3.03764e-29	2.52287e-28
Cdca3	64.5304	41.1915	0.604792	1.52076	3.04955e-29	2.53129e-28
Inpp5b	9.12764	14.1638	-0.676602	0.625637	3.23311e-29	2.68209e-28
Mycl	2.24974	0.496873	2.13435	4.39038	3.47211e-29	2.87868e-28
Ndn	3.04953	0.199644	3.87017	14.623	3.71289e-29	3.07652e-28
Plekhf1	12.3094	21.7235	-0.862446	0.550019	3.8365e-29	3.1771e-28
Mrpl12	169.592	113.041	0.542494	1.45649	3.94787e-29	3.26743e-28
Atp6v0d1	64.7904	88.9291	-0.499726	0.707241	3.99157e-29	3.30167e-28
Rsrp1	50.8426	78.3406	-0.666544	0.630014	4.03098e-29	3.33234e-28
Tspan17	2.93641	9.6336	-1.75583	0.296103	4.48032e-29	3.70165e-28
Lin28b	0.3971	0.011051	5.02744	32.6145	4.65595e-29	3.84453e-28
Cdk2	36.0367	50.8964	-0.540877	0.687353	4.68173e-29	3.86358e-28
Nek6	29.8078	18.0886	0.677619	1.5995	4.70868e-29	3.88357e-28
Bdnf	20.8207	13.1365	0.621727	1.53872	4.76329e-29	3.92634e-28
6330549D23Rik	0.279582	1.51344	-2.47361	0.180041	4.86056e-29	4.0042e-28
Baz2a	11.1595	15.6006	-0.526139	0.694411	5.14874e-29	4.23916e-28
Ivd	20.2311	31.8963	-0.699785	0.615664	5.1524e-29	4.23972e-28
App	81.0307	107.995	-0.457303	0.728347	5.21163e-29	4.28598e-28
Acp5	2.66505	0.169762	3.90069	14.9356	5.34196e-29	4.39063e-28
Tle6	1.70616	6.51511	-1.97377	0.254587	6.53128e-29	5.36506e-28
Slc2a6	3.58857	10.1381	-1.54102	0.343643	6.55751e-29	5.38351e-28
Fyco1	3.41647	6.06003	-0.869412	0.54737	6.84999e-29	5.62038e-28
Enpp1	4.25204	10.8867	-1.39882	0.379238	6.89769e-29	5.65627e-28
Spred3	5.13864	2.24251	1.15357	2.22464	7.51017e-29	6.15497e-28
Prex2	5.21136	2.74747	0.880524	1.84104	7.90036e-29	6.47103e-28
Mrps7	84.8008	56.4002	0.545583	1.45961	8.50546e-29	6.96265e-28
Dlc1	8.29203	13.6259	-0.759562	0.590676	8.79755e-29	7.19763e-28
Hmgn3	30.2138	13.1377	1.15811	2.23166	8.8584e-29	7.24325e-28
Pten	22.2632	33.2573	-0.621694	0.649907	9.08437e-29	7.42376e-28
Pef1	26.58	43.2942	-0.746418	0.596082	9.13839e-29	7.46363e-28
Pdxk	6.56129	10.7741	-0.758415	0.591145	9.18695e-29	7.499e-28
Hiat1	30.601	19.5306	0.604826	1.5208	9.30316e-29	7.58951e-28
Zbtb46	1.29888	0.0782785	3.98752	15.8622	1.04734e-28	8.53933e-28
Hpgd	0.0946672	1.43537	-3.93835	0.0652286	1.04909e-28	8.54865e-28
Fmnl3	23.1169	32.0991	-0.516462	0.699084	1.08458e-28	8.83282e-28
Hs2st1	16.2322	10.5058	0.584807	1.49984	1.11838e-28	9.10291e-28
Stxbp5	5.01283	8.215	-0.755581	0.592308	1.14371e-28	9.30375e-28
Fnbp1	8.92941	13.9426	-0.685707	0.621701	1.2486e-28	1.01512e-27
Chchd2	403.879	273.789	0.517877	1.43185	1.3165e-28	1.06971e-27
Tmem51	1.32539	0.106782	3.56086	11.8012	1.32433e-28	1.07546e-27
Mllt4	24.2459	34.7233	-0.561052	0.677808	1.35303e-28	1.09815e-27
Rictor	10.5206	15.3346	-0.586321	0.666039	1.35491e-28	1.09904e-27
Gfm1	54.7174	36.8757	0.526407	1.44034	1.36412e-28	1.10588e-27
Efna5	13.3896	8.01566	0.697166	1.62132	1.55587e-28	1.26061e-27
Aph1c	0.327727	1.47815	-2.21201	0.215834	1.61373e-28	1.30675e-27
Mdh2	336.545	236.207	0.467827	1.38302	1.749e-28	1.41549e-27
Gm8773	2.66071	0.324874	2.97966	7.88803	1.75684e-28	1.42102e-27
Rev3l	6.64306	10.2554	-0.669193	0.628859	1.83637e-28	1.48451e-27
Slc1a4	8.0826	13.828	-0.817589	0.567389	1.88832e-28	1.52564e-27
Rab11fip1	6.11062	3.30267	0.844365	1.79547	1.94385e-28	1.56962e-27
Pcolce2	18.5934	8.57947	1.07284	2.10358	1.9594e-28	1.58128e-27
Tbc1d31	21.1631	31.8127	-0.630911	0.645768	2.22191e-28	1.79211e-27
Cstf2t	11.9472	19.6169	-0.758307	0.59119	2.30253e-28	1.85609e-27
Rock2	30.6829	42.0029	-0.495867	0.709136	2.34662e-28	1.89056e-27
Psen1	18.8554	27.5977	-0.592426	0.663227	2.41585e-28	1.94523e-27
Rcc2	73.521	96.786	-0.439473	0.737404	2.65156e-28	2.13383e-27
S100a7a	21.0035	5.96235	1.7718	3.4148	2.65406e-28	2.13463e-27
Ampd3	4.08897	7.79243	-0.973238	0.509362	2.71933e-28	2.18556e-27
Uso1	45.705	31.817	0.479658	1.39441	2.72044e-28	2.18556e-27
Chpt1	14.6757	27.4742	-0.947446	0.51855	2.75996e-28	2.21605e-27
Gcnt4	4.65901	2.11611	1.09552	2.1369	2.94084e-28	2.35996e-27
Itgbl1	0.579572	3.51913	-2.64062	0.160359	3.04503e-28	2.44219e-27
Arsa	10.1584	16.2302	-0.718902	0.60756	3.06878e-28	2.45986e-27
Trp53i11	0.201689	1.3221	-2.74559	0.149106	3.2139e-28	2.57473e-27
Rpl41	1541.11	2285.02	-0.611231	0.654638	3.29051e-28	2.63463e-27
Smarcc1	41.0412	28.4647	0.48502	1.39961	3.39354e-28	2.71458e-27
Pdap1	114.238	78.236	0.503187	1.41734	3.39418e-28	2.71458e-27
1810013L24Rik	10.2964	16.168	-0.693704	0.618265	3.43651e-28	2.7469e-27
Dpp9	37.4851	51.233	-0.493623	0.710239	3.7577e-28	3.00195e-27
Actr2	113.968	79.6608	0.47389	1.38885	3.78849e-28	3.02485e-27
Hmgcl	8.84644	18.664	-1.1198	0.460158	4.09563e-28	3.26825e-27
Zfp960	12.963	23.2779	-0.886987	0.540742	4.14139e-28	3.30292e-27
Rcbtb2	18.6748	26.999	-0.574664	0.671443	4.16492e-28	3.31982e-27
Mad2l1	71.9426	47.3259	0.561294	1.47559	4.19103e-28	3.33877e-27
Maged2	38.5897	56.2441	-0.586273	0.666061	4.2452e-28	3.38003e-27
Pafah2	3.98079	7.75439	-1.00472	0.498368	4.28225e-28	3.40763e-27
Pik3ca	9.69408	6.05281	0.63678	1.55486	4.30859e-28	3.42667e-27
Ets2	27.0171	38.1048	-0.538865	0.688312	4.64361e-28	3.69106e-27
Sbf2	5.81606	9.76272	-0.789846	0.578406	5.62762e-28	4.47073e-27
Ccdc85a	0.750514	0.0844247	3.09576	8.54905	5.81674e-28	4.61839e-27
Armcx4	4.3469	2.46324	0.776407	1.71286	5.96516e-28	4.7336e-27
Tpd52	26.6577	12.6752	1.02936	2.04112	6.12867e-28	4.86065e-27
1110051M20Rik	4.48014	10.0941	-1.21457	0.430902	6.35907e-28	5.04057e-27
Sod2	26.5864	37.008	-0.520074	0.697336	6.53104e-28	5.17401e-27
Aldh18a1	36.6773	50.1461	-0.494093	0.710008	6.5835e-28	5.21267e-27
Pias1	9.00577	14.01	-0.680394	0.623995	6.82842e-28	5.40359e-27
Zfc3h1	9.34522	14.1368	-0.639801	0.641802	7.2854e-28	5.76202e-27
Slc10a7	10.4977	16.1907	-0.667961	0.629395	7.43539e-28	5.87738e-27
Lactb	10.5031	21.2237	-1.05749	0.480467	7.51468e-28	5.93676e-27
G2e3	9.07991	13.2489	-0.587879	0.66532	7.68334e-28	6.06665e-27
Gfod1	8.60566	5.07679	0.718483	1.64545	7.75775e-28	6.12201e-27
Eif5a	1197.29	853.152	0.446139	1.36239	8.01953e-28	6.32509e-27
Mrgprf	2.36984	6.02053	-1.38712	0.382327	8.74056e-28	6.88996e-27
Sgk3	0.803515	2.37297	-1.60476	0.32879	8.82131e-28	6.94977e-27
Neurl1b	0.794466	0.160747	2.25779	4.78259	9.55012e-28	7.51979e-27
Dcakd	55.9425	36.5926	0.569433	1.48394	9.75414e-28	7.6762e-27
Rpp25	3.92584	0.360429	3.39751	10.5379	1.00877e-27	7.93434e-27
Snx3	115.95	155.398	-0.465295	0.724323	1.01126e-27	7.94955e-27
Slc35b2	23.3414	34.129	-0.590913	0.663923	1.06485e-27	8.3662e-27
Mrpl19	14.4085	8.46585	0.724373	1.65218	1.09655e-27	8.61045e-27
Filip1l	32.869	44.7444	-0.487776	0.713123	1.11958e-27	8.78651e-27
Eef1e1	64.4099	38.4395	0.70208	1.62685	1.15433e-27	9.05421e-27
Pthlh	1.3064	0.059642	4.35098	20.4068	1.21017e-27	9.48699e-27
Tbc1d16	4.69766	2.24457	1.0223	2.03116	1.27576e-27	9.99568e-27
Efna1	11.4198	4.24442	1.38475	2.61128	1.31787e-27	1.03199e-26
Slc4a2	33.0281	21.9064	0.549557	1.46364	1.37576e-27	1.07674e-26
Lims2	1.02264	3.88903	-1.96888	0.255451	1.37725e-27	1.07731e-26
Pelp1	40.4852	26.869	0.54859	1.46266	1.41913e-27	1.10946e-26
Hacl1	0.912144	3.33614	-1.91102	0.265904	1.46441e-27	1.14423e-26
Eif1a	86.2484	58.13	0.526349	1.44028	1.49363e-27	1.16643e-26
Saraf	37.9142	55.1373	-0.58317	0.667495	1.5215e-27	1.18754e-26
Ap3d1	35.0574	47.4681	-0.48002	0.716968	1.55746e-27	1.21494e-26
2610001J05Rik	28.3825	15.9037	0.792667	1.73227	1.57496e-27	1.22792e-26
Sorbs3	27.6793	39.3826	-0.551621	0.682253	1.59371e-27	1.24186e-26
Ccdc47	61.4337	42.6491	0.483693	1.39832	1.61084e-27	1.25452e-26
Rtca	42.1548	24.7544	0.725147	1.65307	1.73693e-27	1.35198e-26
Prkx	12.3868	6.575	0.87068	1.82852	1.85841e-27	1.44574e-26
Tmed10	45.7884	63.9057	-0.523783	0.695546	1.96186e-27	1.52539e-26
Xxylt1	8.40588	13.866	-0.764978	0.588462	1.99038e-27	1.54672e-26
D1Ertd622e	15.4636	8.32614	0.849958	1.80245	2.10456e-27	1.63456e-26
Slc6a6	66.109	44.4809	0.528817	1.44275	2.13231e-27	1.65521e-26
Col15a1	0.816752	0.0320301	4.59618	24.1873	2.15729e-27	1.67369e-26
Klf2	4.98792	13.813	-1.51262	0.350474	2.23112e-27	1.73003e-26
Spen	7.05029	9.67567	-0.499476	0.707364	2.37098e-27	1.83747e-26
Abca2	6.6942	3.53681	0.877749	1.83751	2.67743e-27	2.07384e-26
Bace2	0.531699	0.015982	4.91603	30.1906	2.70733e-27	2.09587e-26
Tfdp2	6.92013	4.1139	0.707489	1.63296	2.76933e-27	2.1427e-26
Ddx26b	3.74491	7.86529	-1.11303	0.462321	2.78195e-27	2.1513e-26
Rnf39	5.30761	1.0879	2.23904	4.72082	2.93961e-27	2.27198e-26
Lin7c	64.4992	45.4817	0.461192	1.37668	2.97773e-27	2.30019e-26
Mcm7	148.06	105.855	0.441202	1.35774	3.2162e-27	2.48306e-26
Rhbdf2	5.14924	1.73611	1.52425	2.87636	3.22199e-27	2.48618e-26
Tspan12	1.71272	0.0802739	4.34146	20.2726	3.24519e-27	2.50273e-26
Robo1	0.188696	0.84057	-2.19439	0.218486	3.33235e-27	2.56856e-26
Ipo7	91.2462	63.3607	0.483303	1.39794	3.41085e-27	2.62765e-26
Zfp36l2	135.038	90.0306	0.542084	1.45607	3.54499e-27	2.72951e-26
Tnfrsf1b	5.54289	9.50666	-0.821023	0.56604	4.01752e-27	3.09167e-26
Ddx47	65.975	43.0335	0.573502	1.48813	4.23605e-27	3.25808e-26
Rabggtb	72.0423	47.9191	0.545463	1.45949	4.23887e-27	3.25849e-26
H2-T22	11.1883	3.85921	1.49261	2.81397	4.27523e-27	3.28467e-26
E2f7	13.8739	20.3796	-0.597728	0.660794	4.27828e-27	3.28524e-26
Gjc1	20.6074	11.0773	0.852326	1.80541	4.38221e-27	3.36323e-26
A930015D03Rik	2.23058	0.0504953	5.30279	39.4729	4.6006e-27	3.52895e-26
Ccdc136	3.77645	1.12673	1.69999	3.24899	4.79932e-27	3.67939e-26
Tmem19	8.71228	14.9628	-0.822988	0.56527	4.9591e-27	3.79984e-26
Zhx2	2.55953	6.13438	-1.30344	0.40516	5.25319e-27	4.02302e-26
Sh3glb2	38.0235	21.4617	0.78222	1.71977	5.53893e-27	4.23957e-26
Arid5a	2.83626	1.08539	1.34283	2.53649	5.70868e-27	4.36715e-26
Ceacam1	1.30526	0.0691878	4.17184	18.0239	5.95292e-27	4.55156e-26
Letmd1	10.8875	18.4833	-0.80665	0.571708	6.34718e-27	4.8504e-26
Gng10	44.2648	67.7351	-0.656593	0.634375	6.7832e-27	5.18083e-26
Pygb	25.2104	35.388	-0.532093	0.691551	8.05627e-27	6.14986e-26
LOC102636514	3.27164	0	8.88298	472.111	9.39739e-27	7.16979e-26
Pom121	26.7612	17.6946	0.554067	1.46822	1.09499e-26	8.3498e-26
Tspan4	118.299	77.2598	0.571708	1.48628	1.12478e-26	8.57239e-26
Gm14296	8.78677	4.82671	0.821217	1.7669	1.23065e-26	9.37425e-26
Pfn1	1334.32	916.012	0.499692	1.41391	1.23231e-26	9.38186e-26
Supt6	38.472	27.3762	0.448073	1.36422	1.26966e-26	9.66107e-26
Ccr7	0.978001	0	8.97714	503.95	1.275e-26	9.69653e-26
Hcfc1r1	33.8421	55.6406	-0.760256	0.590391	1.3458e-26	1.02295e-25
Timm8a1	104.862	71.9051	0.501355	1.41554	1.36497e-26	1.03697e-25
Cd151	60.4587	37.9793	0.627808	1.54521	1.39383e-26	1.05833e-25
Scyl1	49.3988	34.0288	0.49482	1.40915	1.45614e-26	1.10505e-25
Cxxc4	0.436603	0.0303312	3.77218	13.6628	1.7153e-26	1.30103e-25
Pls1	0.962425	0.129853	2.83229	7.12203	2.15572e-26	1.63422e-25
Mgp	65.0411	12.1921	2.37223	5.17741	2.23013e-26	1.68973e-25
Rnpep	11.6607	20.3572	-0.846808	0.556013	2.34214e-26	1.77365e-25
Wsb2	73.3133	50.8511	0.484879	1.39947	2.52137e-26	1.90837e-25
Klhl2	27.9705	18.2084	0.576359	1.49108	2.78607e-26	2.1076e-25
Ubr2	17.9807	24.9342	-0.514523	0.700024	2.81053e-26	2.12497e-25
Ccl20	1.49181	6.16972	-2.08738	0.235308	3.03773e-26	2.29553e-25
Gps1	124.604	87.7489	0.463048	1.37845	3.05217e-26	2.30522e-25
Rtcb	91.0246	119.959	-0.441088	0.736579	3.05457e-26	2.30581e-25
Vldlr	1.21648	2.41726	-1.03334	0.488579	3.19706e-26	2.4121e-25
Sh3glb1	35.3824	24.988	0.458949	1.37454	3.39345e-26	2.55891e-25
Ncdn	12.1031	19.5977	-0.737979	0.599579	3.79254e-26	2.85835e-25
Stra6	0.578181	0.00695633	6.08354	67.8155	3.85268e-26	2.90213e-25
Tbx4	1.16259	0.0200884	5.71036	52.3589	3.98722e-26	3.00189e-25
Colec12	54.2162	78.0313	-0.568032	0.674536	4.06992e-26	3.06254e-25
Pprc1	34.7112	24.5366	0.457643	1.3733	4.11766e-26	3.09683e-25
Tspo	175.144	248.455	-0.547407	0.684249	4.33007e-26	3.25486e-25
Kbtbd2	16.8593	10.7407	0.607409	1.52352	4.5245e-26	3.39922e-25
Arhgef26	0.5188	0.0501908	3.30781	9.90262	4.67893e-26	3.51339e-25
Spry4	5.23939	2.13411	1.25231	2.38222	4.70605e-26	3.53189e-25
Ppa2	18.9926	9.82299	0.908428	1.877	4.74697e-26	3.56073e-25
Ngfr	0.423062	0.00289953	6.66928	101.778	4.82538e-26	3.61764e-25
Dnajc2	80.5834	54.8263	0.512739	1.42676	4.93238e-26	3.69591e-25
Hmgn2	208.49	270.188	-0.416855	0.749056	5.00811e-26	3.75069e-25
Trp53inp2	8.28741	4.48711	0.84197	1.7925	5.11882e-26	3.83159e-25
Clcf1	30.4515	14.437	1.03343	2.04688	5.18154e-26	3.8765e-25
Ift140	2.91062	5.44186	-0.945592	0.519216	6.9001e-26	5.15951e-25
D6Wsu163e	9.00961	15.279	-0.804515	0.572555	6.98175e-26	5.21782e-25
Ccnb1	125.468	89.2266	0.448983	1.36508	7.23018e-26	5.40066e-25
Mex3b	1.80437	5.76021	-1.71734	0.30411	7.94841e-26	5.93403e-25
Atp5d	207.772	279.083	-0.46859	0.72267	8.21997e-26	6.13356e-25
Sv2a	2.20987	0.612695	1.80842	3.50258	8.4391e-26	6.29377e-25
Ccbe1	4.59719	1.8155	1.29733	2.45774	9.56021e-26	7.12616e-25
Mta1	32.2125	45.0072	-0.525294	0.694818	9.88757e-26	7.36632e-25
Adh5	63.8476	41.7117	0.571146	1.4857	1.0068e-25	7.49685e-25
Arl1	122.483	167.971	-0.498463	0.70786	1.02059e-25	7.59555e-25
Morc2a	33.7204	23.4525	0.480928	1.39564	1.10242e-25	8.20024e-25
Efnb1	12.1896	6.50902	0.86226	1.81788	1.13442e-25	8.43386e-25
Mknk2	24.1202	34.2475	-0.548659	0.683655	1.16017e-25	8.61867e-25
Ralgapb	11.8701	16.4648	-0.515007	0.699789	1.16049e-25	8.61867e-25
Zbtb22	10.331	17.4557	-0.79944	0.574572	1.1712e-25	8.69369e-25
Ect2	68.2365	45.7904	0.53262	1.44655	1.17635e-25	8.72741e-25
Pgrmc2	37.8776	24.9701	0.558308	1.47254	1.19687e-25	8.87503e-25
Desi2	18.2986	11.7488	0.596359	1.5119	1.33519e-25	9.89554e-25
Srsf9	62.9632	40.9386	0.578103	1.49289	1.34505e-25	9.9634e-25
Psmd3	160.023	113.853	0.44824	1.36437	1.40313e-25	1.03883e-24
Tle4	4.94557	2.1973	1.12793	2.18545	1.42645e-25	1.05555e-24
Pgam5	52.2364	33.3519	0.604484	1.52044	1.43727e-25	1.063e-24
Pycr1	1.99918	4.90459	-1.33648	0.395985	1.44859e-25	1.07082e-24
Smarcb1	58.3213	84.8103	-0.583131	0.667514	1.4819e-25	1.09487e-24
Ywhae	494.244	359.698	0.415524	1.33378	1.52749e-25	1.12797e-24
Wbp11	63.1942	44.4585	0.464448	1.37979	1.57643e-25	1.16351e-24
Vax2	1.72935	0.0894984	4.18121	18.1414	1.64153e-25	1.21093e-24
Adam9	113.216	82.0434	0.421789	1.33959	1.68763e-25	1.24429e-24
Sh3gl1	52.1183	77.1311	-0.608511	0.655873	1.72735e-25	1.27291e-24
Acat2	65.5834	105.484	-0.728656	0.603466	1.86209e-25	1.3715e-24
Mt2	114.339	45.3998	1.28944	2.44433	1.93002e-25	1.4208e-24
Ncl	272.431	199.959	0.403392	1.32261	1.96698e-25	1.44726e-24
Trhde	0.233814	0	8.4483	349.295	2.08507e-25	1.53336e-24
Cog5	3.42529	7.29901	-1.13426	0.45557	2.12684e-25	1.56327e-24
Gpatch4	39.7124	23.222	0.731023	1.65982	2.19017e-25	1.60898e-24
Cntnap1	2.73609	1.03853	1.35423	2.55661	2.20725e-25	1.6207e-24
Otub2	1.15701	3.82323	-1.7663	0.293961	2.30293e-25	1.69008e-24
Ppp4r2	52.8687	36.1235	0.506576	1.42067	2.34969e-25	1.72351e-24
Tbc1d15	29.7224	40.7696	-0.498839	0.707676	2.42431e-25	1.77733e-24
Hipk1	15.9219	10.6125	0.542544	1.45654	2.44633e-25	1.79255e-24
Rhou	13.3247	7.33888	0.817335	1.76215	2.4539e-25	1.79717e-24
Ttll4	17.528	10.437	0.704991	1.63013	2.60161e-25	1.90437e-24
Sacm1l	23.2222	31.9117	-0.501366	0.706438	2.66773e-25	1.95177e-24
1500012F01Rik	39.75	69.421	-0.847047	0.555922	2.75213e-25	2.01249e-24
Eogt	9.99681	5.3382	0.862359	1.81801	2.78732e-25	2.03717e-24
Cyp2d22	0.172111	1.22825	-2.86681	0.137089	2.86968e-25	2.09629e-24
Nod2	0.0438222	0.52528	-3.5994	0.0825036	3.06629e-25	2.23877e-24
Mtch1	93.0311	123.534	-0.451945	0.731057	3.26813e-25	2.38491e-24
Ndst3	1.68212	0.379755	2.10163	4.29193	3.31366e-25	2.4169e-24
Ccdc88c	0.774129	0.173881	2.10628	4.30581	3.32531e-25	2.42416e-24
Vegfc	12.422	5.76919	1.06401	2.09074	3.34534e-25	2.43751e-24
Pcnx	3.06958	4.79672	-0.686809	0.621226	3.36689e-25	2.45196e-24
Nrbp2	4.47888	9.29106	-1.09486	0.468181	3.3937e-25	2.47022e-24
Pus1	49.2002	27.5414	0.794368	1.73432	3.89404e-25	2.83297e-24
Usp33	22.4731	15.0601	0.534491	1.44843	3.94697e-25	2.87001e-24
Pacsin3	11.519	19.1149	-0.773621	0.584947	4.08821e-25	2.9712e-24
Prdm1	0.0467126	0.470931	-3.35559	0.097694	4.10062e-25	2.9787e-24
Mark3	18.2562	26.3696	-0.573277	0.672088	4.16987e-25	3.02745e-24
Zfp229	2.04773	4.14996	-1.06176	0.479049	4.36558e-25	3.16794e-24
Gmip	7.9396	4.13187	0.899773	1.86577	4.42217e-25	3.20737e-24
Pycr2	50.4328	32.3197	0.599285	1.51497	4.46142e-25	3.23419e-24
Hbb-b1	0.0475231	2.43315	-5.53398	0.0215827	4.50655e-25	3.26525e-24
Zfp862-ps	2.66388	5.02394	-0.958366	0.51464	4.54843e-25	3.29392e-24
Steap2	21.9433	15.0215	0.503865	1.41801	4.555e-25	3.297e-24
5033428I22Rik	1.64053	0.0216325	5.99388	63.7291	4.60406e-25	3.33082e-24
Actl6a	56.0732	35.0273	0.635775	1.55377	4.69642e-25	3.39591e-24
Kdm4a	19.9054	29.007	-0.585909	0.66623	4.71587e-25	3.40824e-24
Pa2g4	211.732	276.276	-0.426675	0.743975	5.45247e-25	3.9386e-24
Cebpd	6.0212	13.9865	-1.25814	0.418082	5.58293e-25	4.0308e-24
Npm1	1595.14	1163.89	0.411953	1.33049	5.95357e-25	4.29622e-24
1110007C09Rik	60.3396	29.2711	1.00071	2.00098	5.96763e-25	4.30418e-24
Tlr7	1.4116	0.30079	2.18112	4.53505	6.28201e-25	4.52864e-24
Ch25h	0.165204	2.37825	-3.86901	0.0684404	6.44009e-25	4.64025e-24
Hoxb3	2.38835	5.97818	-1.36644	0.387847	6.58079e-25	4.73923e-24
Slc4a4	3.75266	1.78828	1.02661	2.03723	7.0763e-25	5.0935e-24
Mpped2	0.704389	0.0297646	4.4403	21.7102	7.22685e-25	5.19925e-24
Aak1	7.24794	4.97422	0.500158	1.41437	7.23713e-25	5.20401e-24
Srsf11	74.0407	53.1925	0.434268	1.35122	7.39584e-25	5.31546e-24
Pkp4	26.2622	17.7242	0.524251	1.43819	7.91266e-25	5.68403e-24
Cdx2	0.665703	0	8.54199	372.73	8.07075e-25	5.79467e-24
Trim24	11.4381	7.39549	0.586217	1.50131	8.10117e-25	5.81359e-24
Lefty1	1.66399	0.0373664	5.34087	40.5285	8.53195e-25	6.11964e-24
St6galnac4	5.73293	10.1253	-0.863704	0.54954	9.10789e-25	6.52946e-24
Taldo1	94.7578	62.3234	0.561584	1.47589	9.31566e-25	6.67505e-24
Trip11	4.23204	7.9007	-0.943253	0.520059	1.00073e-24	7.16704e-24
Ereg	27.0347	12.7025	1.04701	2.06624	1.00575e-24	7.19936e-24
Vdr	2.33986	6.01391	-1.40452	0.377743	1.03378e-24	7.39628e-24
Bmpr1b	0.952852	0.204236	2.1775	4.52369	1.04307e-24	7.45904e-24
Zfp362	2.27213	5.52772	-1.32445	0.399301	1.15722e-24	8.27113e-24
Lrp1	51.2774	65.3935	-0.393656	0.761198	1.16392e-24	8.31489e-24
Klhdc3	39.6334	57.448	-0.578317	0.669744	1.20256e-24	8.58661e-24
A230046K03Rik	19.4081	26.9237	-0.515024	0.699781	1.27583e-24	9.10521e-24
Atf6b	36.58	51.5953	-0.539131	0.688186	1.29665e-24	9.24915e-24
Jun	36.8163	54.4231	-0.606712	0.656691	1.36062e-24	9.70062e-24
Pcdhga1	0.106941	0.67997	-2.69911	0.153988	1.36918e-24	9.75676e-24
Src	29.9305	20.5601	0.498887	1.41312	1.37821e-24	9.81625e-24
Cnpy2	44.9409	69.1366	-0.664185	0.631045	1.51596e-24	1.07919e-23
Cyth2	17.3445	9.82319	0.777249	1.71386	1.56509e-24	1.11361e-23
Psma5	127.913	87.7141	0.501484	1.41567	1.5861e-24	1.128e-23
Mgat2	25.2516	35.8077	-0.546757	0.684557	1.66705e-24	1.18498e-23
Fam69a	6.44427	2.68034	1.22214	2.33293	1.70833e-24	1.21371e-23
Msrb2	3.62958	0.285576	3.60637	12.1794	1.71868e-24	1.22046e-23
Nqo1	14.9379	28.6872	-0.984	0.505576	1.73145e-24	1.22892e-23
Gm13154	0.0501902	0.801778	-4.00469	0.0622971	1.87304e-24	1.32875e-23
Nr1h4	1.2992	0.110957	3.48009	11.1587	1.88795e-24	1.33866e-23
Glul	12.6857	5.48721	1.16615	2.24411	1.91147e-24	1.35466e-23
Pnkd	64.2423	36.504	0.772468	1.70819	1.93488e-24	1.37057e-23
Gstz1	11.0465	19.0632	-0.830156	0.562469	2.08576e-24	1.47672e-23
Stim2	11.9434	7.37394	0.652717	1.57213	2.11438e-24	1.49624e-23
Nt5dc1	5.21023	9.47682	-0.905517	0.533841	2.1293e-24	1.50604e-23
Kmt2e	11.5582	15.7892	-0.492916	0.710587	2.27492e-24	1.60824e-23
Dnttip2	61.1949	41.7776	0.507836	1.42192	2.27796e-24	1.60959e-23
Hspa4	134.99	97.396	0.42813	1.34549	2.30738e-24	1.62957e-23
Slc39a7	87.9074	113.923	-0.416861	0.749052	2.35787e-24	1.6644e-23
Tppp	0.0618294	0.514714	-3.08689	0.117694	2.40303e-24	1.69544e-23
Ddx20	22.4652	13.5364	0.68775	1.61077	2.67429e-24	1.8859e-23
Mfsd6	1.13121	0.158778	2.77949	6.8661	2.72254e-24	1.91897e-23
Wdr60	3.58014	6.61057	-0.927413	0.5258	2.99691e-24	2.11132e-23
Rbm38	32.2632	18.6611	0.746894	1.67818	3.12126e-24	2.19784e-23
Sqle	79.8808	125.46	-0.694433	0.617952	3.15228e-24	2.21858e-23
Hnrnpa2b1	506.69	371.937	0.403185	1.32242	3.29863e-24	2.32044e-23
Antxr1	16.8882	24.3358	-0.569904	0.673662	3.32881e-24	2.34051e-23
Folr1	1.95267	0.168428	3.4659	11.0494	3.36891e-24	2.36754e-23
Prkar2a	35.6711	48.5056	-0.486321	0.713843	3.55179e-24	2.49483e-23
Rab11fip3	17.6018	25.6626	-0.586957	0.665746	3.56683e-24	2.50416e-23
Ift88	2.54567	5.58938	-1.17666	0.442375	3.74654e-24	2.62903e-23
Tmem62	5.21439	10.6581	-1.07377	0.475077	4.12446e-24	2.89281e-23
Tex261	48.4318	29.5906	0.667824	1.58867	4.27375e-24	2.99604e-23
Cnn3	191.682	137.515	0.436218	1.35305	4.34832e-24	3.04681e-23
Mycbp2	7.29232	9.79214	-0.467992	0.72297	4.37508e-24	3.06406e-23
Atxn7l1	4.07538	8.17881	-1.04707	0.483949	4.9983e-24	3.49881e-23
Wdr11	6.93051	11.0412	-0.714895	0.609249	5.15596e-24	3.6074e-23
Phkb	10.1875	14.9443	-0.595609	0.661765	5.54393e-24	3.87694e-23
Chka	21.1415	12.112	0.760576	1.69417	5.79366e-24	4.0496e-23
Gbe1	5.59226	2.35282	1.20532	2.30588	5.86459e-24	4.09717e-23
C1s2	1.02593	3.8513	-1.94859	0.25907	5.96001e-24	4.16179e-23
Etfb	51.9536	77.6893	-0.623295	0.649186	6.14187e-24	4.28668e-23
Gm16897	0.868043	0.0565452	3.86293	14.5498	6.47827e-24	4.51925e-23
Cbx4	7.48976	3.98337	0.86773	1.82479	7.21087e-24	5.02786e-23
Ide	41.9368	29.1482	0.482007	1.39669	7.31103e-24	5.0952e-23
B3gnt9	9.25868	17.2496	-0.940548	0.521035	7.68942e-24	5.35629e-23
Map2k6	9.186	3.60556	1.30565	2.47196	8.12544e-24	5.65725e-23
Nudcd3	37.9354	26.4485	0.477594	1.39242	8.42726e-24	5.86452e-23
Ube2q2	16.9992	10.2442	0.687942	1.61098	8.47125e-24	5.89225e-23
Zufsp	3.02663	7.47577	-1.34747	0.392981	8.49729e-24	5.90748e-23
Samhd1	49.3104	65.1714	-0.445228	0.734468	8.75826e-24	6.08426e-23
Mtcl1	5.41272	2.45215	1.09951	2.14283	8.76011e-24	6.08426e-23
Fat4	3.06298	4.34837	-0.548359	0.683798	9.68688e-24	6.72467e-23
Atxn7l3b	32.5027	45.6355	-0.532366	0.69142	9.92817e-24	6.88882e-23
Eva1a	0.189864	1.5887	-3.09629	0.116929	1.01858e-23	7.06417e-23
Ampd2	27.7765	17.8181	0.597753	1.51336	1.03345e-23	7.16379e-23
Tuba1b	512.817	655.827	-0.397682	0.759077	1.04881e-23	7.26672e-23
Gm19705	6.33904	0.612255	3.32008	9.98722	1.05189e-23	7.28455e-23
Lhx1	0.910693	0.0149775	5.78886	55.2865	1.09611e-23	7.58704e-23
S100a11	942.718	643.915	0.506982	1.42107	1.15237e-23	7.97264e-23
4930461G14Rik	1.8569	0.0388149	5.37881	41.6086	1.21733e-23	8.41797e-23
Mpp6	31.8735	17.2066	0.846481	1.79811	1.25635e-23	8.68353e-23
Stk24	43.9493	64.0419	-0.586076	0.666152	1.32346e-23	9.14272e-23
Tiam2	20.4339	29.0795	-0.551927	0.682108	1.32407e-23	9.14272e-23
Rab23	12.3614	19.6509	-0.711429	0.610715	1.3279e-23	9.16476e-23
Paip2b	23.4571	15.1469	0.58798	1.50314	1.40783e-23	9.71169e-23
Bace1	7.5077	12.4399	-0.771351	0.585869	1.43009e-23	9.86048e-23
Txndc12	38.3651	61.2732	-0.718147	0.607878	1.44103e-23	9.93115e-23
Gatad2a	37.1778	26.3677	0.452834	1.36873	1.45098e-23	9.99483e-23
Fkbp2	68.3746	38.7213	0.777513	1.71417	1.48253e-23	1.02073e-22
Nbas	4.74214	7.54466	-0.712557	0.610238	1.48472e-23	1.02174e-22
Mrps30	42.0048	24.4443	0.738407	1.66833	1.65156e-23	1.136e-22
Vnn3	0.666396	0	8.29965	315.097	1.66053e-23	1.14162e-22
Eif4enif1	36.0286	25.5019	0.455656	1.37141	1.78521e-23	1.22675e-22
Cpe	216.086	158.153	0.407495	1.32638	1.80781e-23	1.24168e-22
Zfp629	1.73048	3.28629	-0.968075	0.511188	1.81158e-23	1.24367e-22
Pdcd11	33.5208	22.8938	0.507268	1.42136	1.83462e-23	1.25888e-22
Phex	1.1372	0.250917	2.13655	4.3971	1.85755e-23	1.274e-22
Fetub	2.64874	0.0821825	4.91681	30.207	1.92234e-23	1.31781e-22
Uba3	76.3677	52.3923	0.500684	1.41488	2.04981e-23	1.40451e-22
Rcn3	60.8926	82.5085	-0.481193	0.716385	2.10421e-23	1.44105e-22
Pnp	20.3779	28.9668	-0.550365	0.682848	2.10516e-23	1.44105e-22
Usp49	3.97464	6.69831	-0.795719	0.576056	2.10698e-23	1.44161e-22
Bbs12	8.81032	4.3367	0.979749	1.97212	2.20799e-23	1.51e-22
Ccdc92	5.18746	1.73398	1.53599	2.89988	2.24822e-23	1.53677e-22
Slc25a16	5.51532	9.83545	-0.877105	0.544459	2.30402e-23	1.57415e-22
Scamp1	16.0848	10.0591	0.634205	1.55208	2.31056e-23	1.57787e-22
Sptlc2	15.9456	24.1483	-0.641486	0.641052	2.43638e-23	1.66299e-22
Tgfbr3	22.6447	13.5884	0.693914	1.61767	2.44279e-23	1.66657e-22
Rin1	31.9171	22.1841	0.481938	1.39662	2.54204e-23	1.73345e-22
Ehd4	39.7251	27.5032	0.487687	1.40219	2.5885e-23	1.76429e-22
Il1rl1	89.3757	169.815	-0.968267	0.51112	2.65226e-23	1.80689e-22
Birc6	20.5672	27.5472	-0.464414	0.724765	2.66206e-23	1.81269e-22
9630033F20Rik	8.62581	4.35017	0.945182	1.92543	2.68385e-23	1.82666e-22
Zfp26	2.60287	4.0505	-0.680704	0.623861	2.81864e-23	1.91748e-22
Slc2a3	1.82401	3.86231	-1.12487	0.458545	3.1252e-23	2.12502e-22
[truncated: 12,253 more rows]
