# Supplementary material for: Boosting ATM activity alleviates aging and extends lifespan in a mouse model of progeria
Source: eLife journal article supplement (doi:10.7554/elife.34836), 2018-05-02
Supplement: supp [file elife-34836-supp-v1.zip › elife_poa_e34836_Figure_2_source_data_2.xlsx]

## Sheet: POS
					Red and blue indicate up- or downregulation, respectively, in comparison of Atm WT VS KO
Compound Name	m/z (Expected)	RT	Library Score (%)	MEAN WT	MEAN Atm KO	VIP	P-VALUE	Q-VALUE	FOLD CHANGE	LOG_FOLDCHANGE
4-Trimethylammoniobutanoic acid	146.118	2.50227	50	5.63656e-06	0.000493442	1.42347	0.000118869	0.000131546	0.0114229	-6.45192
Acetylcholine	146.118	2.50227	40	5.63656e-06	0.000493442	1.42347	0.000118869	0.000131546	0.0114229	-6.45192
deoxycarnitine	146.118	2.50227	50	5.63656e-06	0.000493442	1.42347	0.000118869	0.000131546	0.0114229	-6.45192
Citrulline	176.103	9.84946	100	4.22452e-05	0.00278553	1.43521	1.94916e-09	1.66242e-07	0.0151659	-6.04302
Xanthine	153.041	3.1984	50	1.11559e-05	0.000310128	1.4351	1.67518e-05	2.97656e-05	0.0359717	-4.79699
Oxypurinol	153.041	3.19182	63	1.12459e-05	0.00030931	1.43481	1.62549e-05	2.91111e-05	0.036358	-4.78158
Ornithine	133.098	14.3488	77	7.23617e-05	0.00096171	1.39359	0.000383397	0.00029727	0.0752427	-3.7323
D-glucose 6-phosphate	261.038	13.5522	81	3.85407e-05	0.000326459	1.38398	0.00143041	0.00086333	0.118057	-3.08245
Riboflavin	377.146	3.42941	51	5.10983e-06	4.23216e-05	1.41162	0.000542148	0.00039015	0.120738	-3.05005
mannose 6-phosphate	261.038	13.5522	81	3.9175e-05	0.000326459	1.38513	0.00144797	0.000871998	0.12	-3.0589
galactose 1-phosphate	261.038	13.5522	81	3.95734e-05	0.000326459	1.3886	0.00146888	0.000882272	0.12122	-3.0443
glucose 1-phosphate	261.038	13.5522	81	3.99595e-05	0.000326459	1.38572	0.00146906	0.000882358	0.122403	-3.03029
noradrenaline	170.082	1.85745	56	2.83757e-05	0.000186818	1.39198	2.62616e-08	5.1801e-07	0.151889	-2.71891
Norepinephrine	170.082	1.85745	56	2.83757e-05	0.000186818	1.39198	2.62616e-08	5.1801e-07	0.151889	-2.71891
Pyridoxine	170.082	1.85923	30	2.83757e-05	0.000186818	1.39198	2.62616e-08	5.1801e-07	0.151889	-2.71891
3-Aminopropionaldehyde	74.06	1.89793		7.55635e-05	0.000453051	1.3891	1.24691e-05	2.38445e-05	0.166788	-2.58391
1-Methylnicotinamide	137.071	5.67898	53	0.000211944	0.00125788	1.42512	3.98513e-05	6.02759e-05	0.168493	-2.56924
Glutathione	308.091	10.6348	100	5.68014e-05	0.000226409	1.2137	0.0132912	0.00560041	0.25088	-1.99493
D-Glucosamine 6-phosphate	260.053	11.2255	35	0.000116649	0.000400592	1.41839	6.69396e-05	8.68864e-05	0.291191	-1.77996
LysoPC(20:1)	550.387	2.09634	88	3.01769e-05	0.00010066	1.40729	3.69338e-05	5.689e-05	0.299789	-1.73798
7-Methylguanine	166.072	2.75917	60	0.000233209	0.000689753	1.28335	0.000211561	0.000192162	0.338106	-1.56445
N-Acetylneuraminic acid	310.114	9.90074		3.41371e-05	9.96158e-05	1.32308	5.45567e-05	7.57184e-05	0.342687	-1.54503
Oxidized glutathione	613.159	14.8008	100	9.27251e-05	0.000259599	1.35299	2.61518e-05	4.32182e-05	0.357185	-1.48525
L-Lysine	147.113	14.1558	40	0.000637979	0.00177273	1.40416	5.18459e-07	1.71262e-06	0.359885	-1.47439
N-acetyl-D-glucosamine-6-phosphate/N-Acetyl-D-mannosamine 6-phosphate/	302.064	12.7079	10	3.846e-05	0.00010294	1.35363	0.000711837	0.000475722	0.373618	-1.42036
L-Asparagine	133.061	9.94456	70	0.000443672	0.00117371	1.41725	5.88989e-06	1.28806e-05	0.378008	-1.40351
L-serine	106.05	9.55406	45	0.00049599	0.00129499	1.42837	1.59327e-06	4.34645e-06	0.383008	-1.38455
L-Acetylcarnitine	204.123	6.61463	50	0.000267049	0.000677156	1.27956	0.0046565	0.00235917	0.394369	-1.34238
O-Acetyl-L-carnitine	204.123	6.60875	64	0.000267049	0.000677156	1.27956	0.0046565	0.00235917	0.394369	-1.34238
1-Methyladenine	150.077	4.50731	51	0.000238199	0.000585741	1.07657	0.0240973	0.00906889	0.406662	-1.2981
3-Methyladenine	150.077	4.50731	51	0.000238199	0.000585741	1.07657	0.0240973	0.00906889	0.406662	-1.2981
7-Methyladenine	150.077	4.50731	51	0.000238199	0.000585741	1.07657	0.0240973	0.00906889	0.406662	-1.2981
Sphingosine	300.29	1.33387	99	0.000160721	0.00039475	1.3692	1.73633e-06	4.64502e-06	0.407147	-1.29638
Choline	104.107	4.80508	71	0.0353504	0.0855882	1.38285	0.00027061	0.000232045	0.413029	-1.27569
beta-Alanine	90.0555	8.04163	30	0.000592166	0.0014019	1.39943	3.07544e-07	1.21782e-06	0.422402	-1.24331
L-Alanine	90.055	8.00452	25	0.000592166	0.0014019	1.39943	3.07544e-07	1.21782e-06	0.422402	-1.24331
Sarcosine	90.0555	8.04163	34	0.000592166	0.0014019	1.39943	3.07544e-07	1.21782e-06	0.422402	-1.24331
L-Proline	116.071	6.61165	50	0.00499396	0.0112215	1.38031	2.60223e-06	6.64052e-06	0.445037	-1.168
2'-deoxyadenosine	252.11	2.05363	55	2.92773e-05	6.52833e-05	1.18563	0.000367106	0.000288632	0.448466	-1.15693
5'-deoxyadenosine	252.11	2.05363	55	2.92773e-05	6.52833e-05	1.18563	0.000367106	0.000288632	0.448466	-1.15693
Deoxyadenosine	252.11	2.0546	40	2.92773e-05	6.52833e-05	1.18563	0.000367106	0.000288632	0.448466	-1.15693
Nicotinamide mononucleotide	335.064	16.0483	37	7.03475e-05	0.000151145	1.36228	0.00015924	0.000160918	0.46543	-1.10336
Nicotinamide ribotide	335.064	16.0483	37	7.03475e-05	0.000151145	1.36228	0.00015924	0.000160918	0.46543	-1.10336
Citraconic acid	131.034	10.3768		6.74131e-06	1.40109e-05	1.22855	0.000594207	0.000417769	0.481149	-1.05544
Itaconic acid	131.034	10.3768		6.74131e-06	1.40109e-05	1.22855	0.000594207	0.000417769	0.481149	-1.05544
Glycerophosphocholine	258.11	9.30896	70	0.00290038	0.00598805	1.3988	8.71445e-05	0.000105008	0.484361	-1.04585
L-a-Lysophosphatidylserine	526.314	5.07559	100	0.000184131	0.000381928	1.397	3.00757e-07	1.21052e-06	0.482109	-1.05257
Hypotaurine	110.028	7.67918	50	4.39549e-05	8.99219e-05	1.19761	0.00838972	0.0038594	0.488812	-1.03265
Deoxycytidine	228.098	3.36634	43	2.31453e-05	4.82788e-05	1.29884	0.000137622	0.000145855	0.47941	-1.06067
5'-Methylthioadenosine	298.097	1.44431	80	0.00031366	0.00062955	1.20718	0.000655746	0.00044882	0.49823	-1.00512
5-oxo-proline	130.05	10.4057	46	0.000673943	0.00131166	1.31403	6.18092e-05	8.24397e-05	0.51381	-0.960692
Pyroglutamic acid	130.05	10.4057	46	0.000673943	0.00131166	1.31403	6.18092e-05	8.24397e-05	0.51381	-0.960692
Pyrrolidonecarboxylic acid	130.05	10.4057	46	0.000673943	0.00131166	1.31403	6.18092e-05	8.24397e-05	0.51381	-0.960692
alpha-aminoadipate	162.077	10.8492	63	2.16327e-05	4.16108e-05	1.30568	0.00134246	0.000819322	0.519882	-0.943745
N-methyl-L-glutamate	162.077	10.8492	63	2.16327e-05	4.16108e-05	1.30568	0.00134246	0.000819322	0.519882	-0.943745
N-Methyl-L-glutamate/2-Aminoadipic acid	162.076	10.8968	50	2.18209e-05	4.16108e-05	1.30389	0.00142297	0.000859644	0.524404	-0.93125
L-Methionine	150.059	6.33487	100	0.000943786	0.00180737	1.39871	6.31873e-08	5.988e-07	0.522188	-0.937359
L-Glutamic acid	148.061	10.3983	80	0.0100506	0.0191717	1.30628	7.06946e-05	8.99925e-05	0.524241	-0.931697
N-acetyl-DL-serine	148.061	10.3983	80	0.0100506	0.0191717	1.30628	7.06946e-05	8.99925e-05	0.524241	-0.931697
N-methyl-D-aspartic acid	148.061	10.3983	80	0.0100506	0.0191717	1.30628	7.06946e-05	8.99925e-05	0.524241	-0.931697
O-Acetyl-L-serine	148.061	10.3983	80	0.0100506	0.0191717	1.30628	7.06946e-05	8.99925e-05	0.524241	-0.931697
DL-homo-beta-valine (3-Amino-4-methylpentanoic acid)	132.102	5.35015	44	0.00632326	0.0118707	1.38521	3.16534e-07	1.22714e-06	0.532676	-0.90867
DL-Norleucine	132.102	5.35015	44	0.00632326	0.0118707	1.38521	3.16534e-07	1.22714e-06	0.532676	-0.90867
L-Leucine	132.102	5.35015	43	0.00632326	0.0118707	1.38521	3.16534e-07	1.22714e-06	0.532676	-0.90867
N6,N6,N6-Trimethyl-L-lysine	189.16	14.1601	40	6.7402e-05	0.000124718	1.38832	3.28269e-06	8.09729e-06	0.540434	-0.887809
S-Adenosylmethionine	399.145	16.2837	89	0.000109671	0.000202757	1.05093	0.0122605	0.00525902	0.540898	-0.88657
S-(5'-adenosyl)-L-methionine	399.145	16.2837	89	0.000109671	0.000202588	1.05026	0.0123865	0.00530143	0.541351	-0.885364
1-aminocyclopropane-1-carboxylate	102.055	10.3853	73	7.69197e-05	0.000139959	1.3016	8.24851e-05	0.00010092	0.549589	-0.863576
flavin adenine dinucleotide	786.164	10.7264	98	1.47806e-05	2.67803e-05	1.39052	2.58687e-07	1.15929e-06	0.55192	-0.857468
UDP-N-acetyl-D-galactosamine	608.089	11.9032	92	0.000165854	0.00028345	1.12634	0.00421409	0.00218243	0.585125	-0.773182
uridine 5'-diphospho-N-acetylglucosamine	608.089	11.9032	92	0.000165854	0.00028345	1.12634	0.00421409	0.00218243	0.585125	-0.773182
Gamma Glutamylglutamic acid	277.103	13.0514	83	5.90473e-05	9.74719e-05	1.27606	0.000275442	0.000235121	0.605788	-0.723116
Hypoxanthine	137.046	2.46571	67	0.0236688	0.0387054	1.33851	1.41129e-05	2.6167e-05	0.61151	-0.709551
allothreonine	120.066	8.81816	79	0.00256542	0.00414435	1.26219	0.000201406	0.000186603	0.619015	-0.691953
homoserine	120.066	8.81816	79	0.00256542	0.00414435	1.26219	0.000201406	0.000186603	0.619015	-0.691953
L-threonine	120.066	8.81816	79	0.00256542	0.00414435	1.26219	0.000201406	0.000186603	0.619015	-0.691953
L-Threonine/L-Homoserine	120.066	8.9929	40	0.00256542	0.00414435	1.26219	0.000201406	0.000186603	0.619015	-0.691953
L-Isoleucine	132.102	5.76	44	0.00492198	0.00787219	1.30394	3.59601e-05	5.57322e-05	0.625237	-0.677525
Thiamine	265.112	6.8278	46	0.00100066	0.001564	1.01569	0.0164027	0.00660988	0.639813	-0.644278
L-Valine	118.087	6.62	29	0.0029651	0.00463169	1.37737	7.57625e-07	2.35071e-06	0.640177	-0.643457
Glycine	76.0398	8.69153	50	0.000235341	0.000365925	1.24871	0.000189238	0.00017964	0.64314	-0.636796
L-Phenylalanine	166.087	5.30825	100	0.00420848	0.00642481	1.29687	4.14968e-05	6.21323e-05	0.655035	-0.610355
D-tryptophan	205.098	5.39467	100	0.000631366	0.000934312	1.28045	0.000133722	0.000142981	0.675755	-0.565427
L-tryptophan	205.098	5.39467	100	0.000631366	0.000934312	1.28045	0.000133722	0.000142981	0.675755	-0.565427
5-L-Glutamyl-L-alanine	219.098	11.7587	28	1.62277e-05	2.3641e-05	1.05391	0.00785545	0.00365013	0.686422	-0.542833
Indoleacrylic acid	188.071	5.39551	87	0.000114386	0.000164261	1.26578	0.000156785	0.000159279	0.696371	-0.522073
Creatinine	114.067	2.50209	43	0.000945544	0.00134221	1.04471	0.00958097	0.00431128	0.704467	-0.505395
dIMP	333.059	10.4191		0.00010715	0.000150447	1.18398	0.000879829	0.000570593	0.712212	-0.489621
L-Methionine S-oxide	166.053	9.6864	20	0.000115016	0.000158978	1.22805	0.000380034	0.000295506	0.723468	-0.466999
3-Hydroxybenzaldehyde	123.045	6.8222		1.6362e-05	2.23488e-05	1.20413	0.000513423	0.000374346	0.732119	-0.449849
4-Hydroxybenzaldehyde	123.044	6.8222		1.6362e-05	2.23488e-05	1.20413	0.000513423	0.000374346	0.732119	-0.449849
Betaine	118.087	5.4797	43	0.00369023	0.00495896	1.09221	0.0137124	0.00573646	0.744155	-0.426325
L-norvaline	118.087	5.4797	43	0.00369023	0.00495896	1.09221	0.0137124	0.00573646	0.744155	-0.426325
N-Methyl-a-aminoisobutyric acid	118.086	5.4797	43	0.00369023	0.00495896	1.09221	0.0137124	0.00573646	0.744155	-0.426325
L-Tyrosine	182.082	6.84866	100	0.00109944	0.00146762	1.22396	0.000434174	0.000328504	0.749136	-0.416701
Pregnan-20-one, 17-(acetyloxy)-3-hydroxy-6-methyl-, (3b,5b,6a)-/Pregnan-20-one, 17-(acetyloxy)-3-hydroxy-6-methyl-, (3a,5b,6a)-	391.284	0.779005	50	0.000585426	0.000770329	1.09812	0.00533059	0.00261418	0.759969	-0.395987
N-Acetylputrescine	131.118	6.4072	59	7.49787e-05	9.43291e-05	1.15619	0.0013079	0.00080176	0.794863	-0.331223
L-Pipecolic acid	130.087	1.47097	15	8.41225e-05	9.91151e-05	1.01626	0.0111786	0.00488723	0.848735	-0.236614
N4-Acetylaminobutanal	130.086	1.47097	25	8.41225e-05	9.91151e-05	1.01626	0.0111786	0.00488723	0.848735	-0.236614
Phytosphingosine	318.3	1.27352	100	0.000479028	0.000334003	1.24552	0.000314056	0.000258742	1.4342	0.520248
4-Guanidinobutanoic acid	146.092	8.30175	26	7.65325e-05	4.56777e-05	1.09996	0.00349687	0.00187861	1.67549	0.744582
Nicotine	163.123	1.50698	76	7.97201e-05	4.63244e-05	1.13785	0.00874644	0.00399682	1.72091	0.783172
Sphinganine	302.305	1.2502	89	0.000311279	0.000172793	1.27906	0.00268507	0.00150614	1.80146	0.849168
Carbanilide	213.102	2.37842		2.20941e-05	1.05975e-05	1.25844	0.000514243	0.000374803	2.08485	1.05994
Harmine	213.102	2.37842		2.20941e-05	1.05975e-05	1.25844	0.000514243	0.000374803	2.08485	1.05994
Deoxyguanosine diphosphate	428.037	13.7621	40	0.000133297	5.96927e-05	1.22994	0.00440963	0.00226151	2.23306	1.15902
beta-Nicotinamide adenine dinucleotide hydrate (NAD)	664.117	11.9366	78	0.000128663	4.44305e-05	1.36603	0.00269101	0.00150898	2.89583	1.53398
Cytarabine	244.093	4.42375	40	0.00448166	0.00146276	1.37333	2.49108e-07	1.14596e-06	3.06383	1.61534
Cytidine	244.093	4.42375	40	0.00448166	0.00146139	1.37317	2.51325e-07	1.14911e-06	3.06671	1.61669
Guanidineacetic acid	118.062	1.46921	42	3.97466e-05	1.24248e-05	1.20005	0.00452474	0.00230734	3.19898	1.67761
Biotin	245.095	4.42402		0.000365356	0.000101492	1.36094	8.36554e-07	2.54818e-06	3.59986	1.84794
Propionylcarnitine	218.139	5.81045	60	0.000213687	4.55205e-05	1.38976	0.000175899	0.000171603	4.6943	2.23091
2'-deoxyguanosine	268.104	2.55468	100	0.00813072	0.00137284	1.32635	0.011224	0.00490311	5.92254	2.56622
Adenosine	268.104	2.55468	99	0.00813072	0.00137284	1.32635	0.011224	0.00490311	5.92254	2.56622
Deoxyguanosine	268.104	2.55148	65	0.00813072	0.00137284	1.32635	0.011224	0.00490311	5.92254	2.56622
D-Glutamylglycine	205.082	11.3904	86	0.000341218	4.58192e-05	1.42815	1.86722e-05	3.25009e-05	7.44706	2.89667
Cyclic pyranopterin monophosphate	364.065	13.3308	50	0.000309028	3.74968e-05	1.3068	0.00366564	0.00195212	8.24144	3.0429
guanosine 5'-monophosphate	364.066	13.3308	50	0.000309028	3.74968e-05	1.3068	0.00366564	0.00195212	8.24144	3.0429
Citicoline	489.115	12.0877	100	0.000211173	1.816e-05	1.26966	4.97033e-06	1.13226e-05	11.6285	3.53959
cytidine 5'-diphosphocholine	489.115	12.0877	100	0.000211173	1.816e-05	1.26966	4.97033e-06	1.13226e-05	11.6285	3.53959
Adenosine monophosphate	348.07	12.3013	42	0.00106053	9.36174e-05	1.37508	3.8914e-05	5.92015e-05	11.3283	3.50186
L-Arginine	175.119	14.0528	100	0.00329367	0.000277384	1.42774	5.28003e-07	1.73204e-06	11.874	3.56974
Inosine 5'-monophosphate (IMP, Inosinic acid)	349.055	12.6406		0.000175394	1.40749e-05	1.36336	8.13318e-05	9.98889e-05	12.4614	3.6394
Uridine 5'-monophosphate	325.044	12.5009	46	0.000396933	2.77096e-05	1.42404	2.83737e-07	1.1911e-06	14.3248	3.84044
ophthalmic acid	290.135	10.5383	90	0.000310319	1.65554e-05	1.43396	9.16144e-06	1.86999e-05	18.7442	4.22838
N1-Acetylspermidine	188.176	16.1639	66	0.00104591	0.000642645	1.19288	0.000311358	0.000257145	1.62751	0.70267
Adenosine diphosphate ribose	560.079	11.6612		1.17875e-05	3.57041e-06	1.22276	0.0315691	0.0112338	3.30144	1.7231
diethanolamine	106.087	6.28943	30	0.000149453	9.05326e-05	1.00371	0.0119969	0.00516974	1.65082	0.723183
4-chloro-L-phenylalanine	200.047	4.50739	77	0.616401	0.483088	1.30722	2.45058e-05	4.09538e-05	1.27596	0.351583
Guanosine	284.099	5.28137	55	0.000827081	0.000464443	1.02007	0.0136545	0.00571788	1.7808	0.832526
Putrescine	89.1078	16.9923	40	0.000241358	0.000177692	1.03158	0.00493823	0.00246777	1.35829	0.441795
Cytidine monophosphate	324.059	12.3013	20	2.49229e-05	1.87444e-05	1.05903	0.00950353	0.0042825	1.32962	0.41101
Cytidine monophosphate N-acetylneuraminic acid	615.155	12.2881	30	4.79099e-05	3.70857e-05	1.11348	0.00596746	0.00287548	1.29187	0.369458
Indole	118.065	4.52123	30	0.00224728	0.00179188	1.21792	0.000448455	0.000337019	1.25415	0.326708
Deoxyinosine	253.093	2.71662	37	1.20903e-06	6.63427e-05	1.42809	0.000315541	0.000259617	0.018224	-5.77802
Xanthosine	285.083	3.62488	70	1.24333e-06	6.01148e-05	1.42411	0.000191896	0.00018119	0.0206826	-5.59544
(3S)-3,6-Diaminohexanoate/(3S,5S)-3,5-Diaminohexanoate	147.113	14.2236	60	0.000637979	0.00177273	1.40416	5.18459e-07	1.71262e-06	0.359885	-1.47439
2-Pyrrolidinone	86.06	8.60156	50	1.54272e-05	4.22454e-05	1.06847	0.00104987	0.000665551	0.365181	-1.45332
3-Ureidopropionic acid	133.061	9.94456	70	0.000443672	0.00117371	1.41725	5.88989e-06	1.28806e-05	0.378008	-1.40351
4-Aminopyridine	95.0604	18.9766	31	0.000833673	0.000681243	1.25467	9.85967e-05	0.000114768	1.22375	0.291312
5-Aminopentanoic acid	118.087	5.4797	43	0.00369023	0.00495896	1.09221	0.0137124	0.00573646	0.744155	-0.426325
5-Phosphoribosylamine	230.042	16.1117		2.85379e-06	2.04171e-05	1.30901	0.000272076	0.000232981	0.139775	-2.83883
Cytidine 5'-diphosphate	404.026	15.7002		1.9848e-05	2.76825e-06	1.23117	0.0114377	0.00497756	7.16986	2.84195
Dimethylurea	89.0709	0.544002	38	0.00052207	0.000438065	1.22522	0.000212115	0.000192459	1.19177	0.2531
fructose 6-phosphate	261.038	13.5522	81	2.56806e-05	0.000331279	1.37335	0.00312828	0.00171347	0.0775197	-3.68929
Glycyl-glycine	133.061	9.94456	70	0.000443672	0.00117371	1.41725	5.88989e-06	1.28806e-05	0.378008	-1.40351
L-Serine	106.05	9.54458	31	0.00049599	0.00129499	1.42837	1.59327e-06	4.34645e-06	0.383008	-1.38455
15-Deoxy-d-12,14-PGJ2	317.211	2.54772		1.00976e-06	2.77441e-06	1.35825	0.00237029	0.00135271	0.363955	-1.45817
4-Hydroxyretinoic acid	317.211	2.54772		1.00976e-06	2.77441e-06	1.35825	0.00237029	0.00135271	0.363955	-1.45817
Agmatine	131.13	0.607223		4.04289e-06	2.80787e-06	1.2319	0.000738673	0.00048838	1.43984	0.52591
Adenosine tetraphosphate	587.969	12.2035		6.58931e-06	8.10751e-07	1.43405	1.24898e-05	2.38746e-05	8.12741	3.0228
UDP-glucose	567.063	12.397		5.64592e-06	1.16082e-06	1.33659	0.000201619	0.000186721	4.86373	2.28206
uridine 5'-diphosphogalactose	567.063	12.397		5.64592e-06	1.16082e-06	1.33659	0.000201619	0.000186721	4.86373	2.28206
Cellobiose	343.123	9.74902		1.1699e-06	6.19983e-06	1.39835	4.58355e-08	5.58469e-07	0.188699	-2.40584
D-lactose	343.124	9.74902		1.1699e-06	6.19983e-06	1.39835	4.58355e-08	5.58469e-07	0.188699	-2.40584
N-Acetyl-DL-methionine	192.069	3.34459		3.59202e-06	6.45547e-06	1.04497	0.00941092	0.00424798	0.55643	-0.845727
1-Methylhistamine	126.103	0.607223		1.15588e-05	9.1192e-06	1.05858	0.00336458	0.00182007	1.26752	0.342011
3-methylhistamine	126.103	0.607223		1.15588e-05	9.1192e-06	1.05858	0.00336458	0.00182007	1.26752	0.342011
S-Ribosyl-L-homocysteine	268.085	10.2078		1.00976e-06	7.03999e-06	1.41953	0.000329933	0.000267983	0.143432	-2.80156
CDP-ethanolamine	447.068	12.2035		1.01445e-05	1.82606e-06	1.30003	1.76379e-06	4.70102e-06	5.5554	2.47389
GDP-L-fucose	590.09	12.7227		9.01593e-06	1.06982e-06	1.39422	0.000268289	0.000230557	8.42754	3.07511
adenosine-5'-diphosphoglucose	590.09	12.7227		9.01593e-06	1.06982e-06	1.39422	0.000268289	0.000230557	8.42754	3.07511
Purine	121.051	1.68197		1.00976e-06	8.23587e-06	1.3951	0.00196713	0.00114823	0.122605	-3.02791
glycerol 2-phosphate	173.021	8.38964		4.53319e-06	1.05372e-05	1.40958	3.55399e-08	5.42015e-07	0.430208	-1.21689
Cholesterol-H2O	369.352	0.782117		1.19278e-05	7.75318e-06	1.12337	0.00518876	0.00256189	1.53844	0.621464
Lathosterol-H2O	369.352	0.782117		1.19278e-05	7.75318e-06	1.12337	0.00518876	0.00256189	1.53844	0.621464
N-acetyl-D-tryptophan	247.108	3.47419		1.00976e-06	1.11343e-05	1.42409	0.000473345	0.000351587	0.090689	-3.46293
Carnosine	227.114	10.8492		3.5723e-06	1.18367e-05	1.38391	4.48289e-07	1.56108e-06	0.301797	-1.72835
LysoPC(20:0)	552.402	2.05128		4.65976e-06	1.25458e-05	1.39375	2.37949e-07	1.12951e-06	0.37142	-1.42888
Porphobilinogen	227.103	2.52229		1.00976e-06	9.58061e-06	1.40619	0.005462	0.002662	0.105396	-3.24611
S-(-)-Carbidopa	227.103	2.52229		1.00976e-06	9.58061e-06	1.40619	0.005462	0.002662	0.105396	-3.24611
5-amino-1-[3,4-dihydroxy-5-(hydroxymethyl)oxolan-2-yl]imidazole-4-carboxamide	259.104	3.19182		1.46963e-06	1.56969e-05	1.38204	6.19863e-08	5.96595e-07	0.0936252	-3.41696
4-Methoxyphenylacetic acid	167.07	2.75917		2.88846e-06	9.85182e-06	1.2254	0.000718903	0.000479022	0.29319	-1.77009
D-Phenyllactic acid	167.07	2.75917		2.88846e-06	9.85182e-06	1.2254	0.000718903	0.000479022	0.29319	-1.77009
Desaminotyrosine	167.07	2.75917		2.88846e-06	9.85182e-06	1.2254	0.000718903	0.000479022	0.29319	-1.77009
L-3-Phenyllactic acid	167.07	2.75917		2.88846e-06	9.85182e-06	1.2254	0.000718903	0.000479022	0.29319	-1.77009
guanosine 5'-diphosphate	444.032	15.9012		5.72468e-06	1.1519e-05	1.17085	0.00437896	0.00224921	0.496978	-1.00875
Histamine	112.087	14.0213		1.07485e-05	1.37567e-06	1.1788	0.0401983	0.0135053	7.81327	2.96593
N-Acetylglutamine	189.087	10.354		9.0015e-06	1.79988e-05	1.1802	0.000382831	0.000296974	0.500116	-0.999666
N-Acetyl-D-galactosamine	222.098	8.68068		2.55265e-05	8.2552e-06	1.32461	1.35597e-05	2.54013e-05	3.09217	1.62862
N-Acetyl-D-glucosamine	222.098	8.68068		2.55265e-05	8.2552e-06	1.32461	1.35597e-05	2.54013e-05	3.09217	1.62862
N-Acetyl-D-mannosamine	222.098	8.68068		2.55265e-05	8.2552e-06	1.32461	1.35597e-05	2.54013e-05	3.09217	1.62862
Thiamine pyrophosphate	425.044	16.1802		5.65516e-06	2.90032e-05	1.28907	4.1603e-05	6.22508e-05	0.194984	-2.35857
D-Sedoheptulose 7-phosphate	291.048	13.151		2.82746e-05	1.0196e-05	1.0577	0.023537	0.00889818	2.77312	1.47151
5-aminopentanamide	117.102	6.5157		3.85731e-05	1.0538e-05	1.19368	0.009693	0.00435276	3.66037	1.87199
S-Glutathionyl-L-cysteine	427.095	13.687		1.72415e-05	4.62579e-05	1.31597	0.000101961	0.000117516	0.372725	-1.42382
Methylimidazoleacetic acid	141.066	5.75649		1.28953e-05	8.67947e-05	1.34416	0.000643961	0.000443002	0.148572	-2.75076
2'-deoxycytidine 5'-monophosphate	308.065	1.57479		1.00976e-06	5.38818e-06	1.12776	0.0273019	0.0100163	0.187403	-2.41579
2-keto-3-deoxy-D-glycero-D-galacto-nononate-9-phosphate	346.03	12.7463		1.00976e-06	4.89789e-06	1.1189	0.0203696	0.00790334	0.206162	-2.27815
3,4-dihydroxy-5-all-trans-nonaprenylbenzoate	767.597	1.37843		2.59805e-06	8.10751e-07	1.12191	0.0276932	0.0101287	3.20449	1.6801
3-Deoxy-D-glycero-D-galacto-2-nonulosonic acid	268.079	4.42491		9.22395e-06	2.08769e-06	1.23558	5.25504e-05	7.37618e-05	4.41826	2.14348
4a-Hydroxytetrahydrobiopterin	258.12	2.48669		6.08684e-06	2.98072e-06	1.00894	0.00140878	0.000852598	2.04207	1.03003
5-Aminoimidazole ribonucleotide	296.064	9.29855		4.66307e-05	0.000156251	1.40896	9.96647e-05	0.000115646	0.298436	-1.74451
5-Methylcytidine/2-O-Methylcytidine	258.109	9.2946	98	0.00290106	0.00598916	1.39887	8.81007e-05	0.000105832	0.484385	-1.04577
5-hydroxytryptophol glucuronide	354.118	6.87117		1.38394e-06	7.30519e-06	1.35341	1.12323e-07	8.31501e-07	0.189446	-2.40014
Aflatoxin B1exo-8,9-epoxide-GSH	636.149	14.7977		1.00976e-06	6.38763e-06	1.38547	0.00199764	0.00116403	0.15808	-2.66127
Azelaic acid	189.112	1.48246		1.00976e-06	4.56526e-06	1.38317	0.00516441	0.00255284	0.221183	-2.17668
D-Mannosamine	180.087	1.94214	11	1.41076e-05	0.000147525	1.39387	0.00345785	0.00186142	0.0956286	-3.38641
Deoxyuridine	229.082	2.26871		1.49943e-06	5.15163e-06	1.24695	0.00174891	0.00103361	0.29106	-1.78061
Glucosamine	180.087	1.94977	10	1.41076e-05	0.000147525	1.39387	0.00345785	0.00186142	0.0956286	-3.38641
L-pipecolic acid	130.087	1.46303	55	8.41225e-05	9.91151e-05	1.01626	0.0111786	0.00488723	0.848735	-0.236614
Maltol	127.039	13.5946		1.74171e-06	4.85521e-05	1.38138	0.00122872	0.000760927	0.035873	-4.80096
Muramic acid	252.108	2.05363	55	2.92773e-05	6.52833e-05	1.18563	0.000367106	0.000288632	0.448466	-1.15693
N-Stearoyl-D-sphingomyelin	732.614	1.68036		0.000218818	0.000291284	1.21377	0.000666923	0.000454284	0.751219	-0.412694
Quercetin	303.05	13.7031		1.69683e-06	2.04409e-05	1.10008	0.00878183	0.00401035	0.0830114	-3.59055
Shikimic Acid	175.06	14.0615		3.16772e-06	8.10751e-07	1.04415	0.0401824	0.0135013	3.90714	1.96611
beta-D-Glucosamine	180.087	1.94214	11	1.41076e-05	0.000147525	1.39387	0.00345785	0.00186142	0.0956286	-3.38641
galactosamine	180.087	1.94214	11	1.41076e-05	0.000147525	1.39387	0.00345785	0.00186142	0.0956286	-3.38641
serotonin O-sulfate	257.059	2.0727		1.0011e-05	1.33289e-05	1.12413	0.00429333	0.00221466	0.751073	-0.412976
tetrahydrobiopterin	242.125	16.6103		9.66001e-05	0.000171306	1.01066	0.00588823	0.00284234	0.563903	-0.82648

## Sheet: NEG
				Red and blue indicate up- or downregulation, respectively, in comparison of Atm WT VS KO
Compound Name	m/z (Expected)	MEAN WT	MEAN Atm KO	VIP	P-VALUE	Q-VALUE	FOLD CHANGE	LOG_FOLDCHANGE
Thromboxane B2	369.228	8.02997e-07	0.000373305	1.42431	5.62115e-05	7.63714e-05	0.00215105	-8.86075
Uric acid	167.021	1.11334e-06	0.000132411	1.40227	0.000652744	0.000464077	0.00840815	-6.894
Xanthosine	283.068	8.02997e-07	0.000292846	1.42099	0.000541932	0.000403569	0.00274204	-8.51053
D-Ornithine	131.082	9.76226e-07	0.000312309	1.41903	3.54733e-08	4.19409e-07	0.00312583	-8.32154
L-Ornithine	131.083	9.76226e-07	0.000312309	1.41903	3.54733e-08	4.19409e-07	0.00312583	-8.32154
Citrulline	174.088	7.39163e-06	0.00135932	1.36467	7.41333e-11	7.75371e-09	0.00543775	-7.52277
Deoxyinosine	251.079	8.66484e-06	0.000180872	1.40152	0.000145209	0.00015054	0.047906	-4.38365
Oxypurinol	151.026	0.00232757	0.0374352	1.42133	2.29434e-06	8.09215e-06	0.0621758	-4.0075
Xanthine	151.026	0.00232757	0.0374352	1.42133	2.29434e-06	8.09215e-06	0.0621758	-4.0075
Orotic acid	155.009	3.62329e-05	0.000592491	1.24922	4.89937e-06	1.37041e-05	0.0611534	-4.03142
2,4-dihydroxypyrimidine-5-carboxylic acid	155.009	3.70396e-05	0.000592491	1.29841	4.90319e-06	1.37112e-05	0.062515	-3.99965
1-Methyladenine	148.063	3.425e-06	5.36291e-05	1.30168	0.000794847	0.000536101	0.0638646	-3.96884
3-Methyladenine	148.063	3.425e-06	5.36291e-05	1.30168	0.000794847	0.000536101	0.0638646	-3.96884
7-Methyladenine	148.063	3.425e-06	5.36291e-05	1.30168	0.000794847	0.000536101	0.0638646	-3.96884
Ribothymidine	257.078	2.73643e-06	2.21636e-05	1.32344	0.00307587	0.00161713	0.123465	-3.01783
Dihydroxyacetone phosphate	168.99	8.90913e-05	0.0007074	1.29737	0.00100675	0.000631257	0.125942	-2.98917
D-fructose 6-phosphate	259.022	0.000299179	0.00227868	1.36334	0.00183752	0.00106375	0.131295	-2.92911
D-galactose 1-phosphate	259.022	0.000308204	0.0022733	1.36505	0.00222469	0.00124842	0.135576	-2.88283
Glutathione	306.077	1.16966e-05	8.16839e-05	1.20486	0.00496431	0.00233558	0.143194	-2.80396
Arabinose	149.046	2.61371e-05	0.000140638	1.40721	9.10419e-10	3.17407e-08	0.185846	-2.42782
Arabinose/Xylulose/Ribulose/Arabinose/Ribose/Xylose/Lyxose	149.046	2.61371e-05	0.000140638	1.40721	9.10419e-10	3.17407e-08	0.185846	-2.42782
Uracil	111.019	0.00435782	0.0219256	1.38114	2.97549e-08	3.94988e-07	0.198755	-2.33094
Deoxyuridine	227.067	1.19822e-05	5.8142e-05	1.28823	2.38245e-05	3.93467e-05	0.206086	-2.27868
4-Imidazoleacetic acid	125.036	0.000230862	0.00102771	1.38851	0.000205073	0.000198581	0.224637	-2.15433
Thymine	125.035	0.000230862	0.00102771	1.38851	0.000205073	0.000198581	0.224637	-2.15433
Eicosapentaenoic acid	301.217	0.00124895	0.00521772	1.4065	0.000108154	0.000120535	0.239368	-2.0627
N-acetyl-L-aspartic acid	174.04	9.79836e-05	0.00037368	1.30966	7.85951e-05	9.7571e-05	0.262212	-1.93119
D-(+)-Glucose	179.056	0.000257696	0.000956925	1.38937	7.18541e-08	5.01021e-07	0.269296	-1.89274
Myoinositol	179.056	0.000257696	0.000956925	1.38937	7.18541e-08	5.01021e-07	0.269296	-1.89274
Tagatose/Gulose/Fructose/Galactose/Mannose/Sorbose/Allose	179.056	0.000257696	0.000956925	1.38937	7.18541e-08	5.01021e-07	0.269296	-1.89274
2-Dehydro-L-gulonate/3-Dehydro-L-gulonate	193.035	5.52193e-05	0.000202242	1.37576	5.49988e-08	4.73489e-07	0.273036	-1.87284
D-Glucuronic acid	193.035	5.52193e-05	0.000202242	1.37576	5.49988e-08	4.73489e-07	0.273036	-1.87284
galacturonic acid	193.035	5.52193e-05	0.000202242	1.37576	5.49988e-08	4.73489e-07	0.273036	-1.87284
phosphoenol pyruvate	166.975	0.00179074	0.00639875	1.13529	0.0183473	0.00695072	0.279858	-1.83723
S-Ribosyl-L-homocysteine	266.07	2.87042e-06	1.6156e-05	1.18404	5.03076e-05	7.00957e-05	0.177669	-2.49273
D-Glucosamine 6-phosphate	258.038	0.000113024	0.000356495	1.39899	1.10405e-05	2.32759e-05	0.317043	-1.65725
N-Acetyl-alpha-D-glucosamine 1-phosphate/N-acetyl-D-glucosamine-6-phosphate/N-Acetyl-D-mannosamine 6-phosphate	300.049	0.000104126	0.000325905	1.31262	0.000642367	0.000458548	0.319499	-1.64612
Oxidized glutathione	611.145	0.000100602	0.000301725	1.32197	0.000408622	0.000326982	0.333421	-1.58458
3-hydroxy-3-methylglutarate	161.045	4.77716e-05	0.000144807	1.14639	1.79287e-05	3.24805e-05	0.329899	-1.59991
Levoglucosan/L-Rhamnono-1,4-lactone/2-Dehydro-3-deoxy-L-rhamnonate/(R)-2-Ethylmalate/(2R,3S)-2,3-Dimethylmalate/(R)-3,3-Dimethylmalate	161.046	4.77716e-05	0.000144807	1.14639	1.79287e-05	3.24805e-05	0.329899	-1.59991
Glycerol 3-phosphate	171.006	5.91283e-05	0.000165238	1.02676	0.0343649	0.0116771	0.357838	-1.48262
L-serine	104.035	0.000596677	0.00167827	1.40967	6.86864e-06	1.69327e-05	0.355532	-1.49195
Glycerate 2-phosphate	184.986	0.000489135	0.0013545	1.06576	0.0161974	0.00627198	0.361118	-1.46946
Docosahexaenoic acid	327.233	0.00371619	0.00937321	1.37704	4.63759e-07	2.55291e-06	0.396469	-1.33472
Allantoin	157.036	0.000156172	0.000384423	1.36606	3.18106e-06	1.00822e-05	0.406249	-1.29956
16(17)-EpDPE	343.228	2.63475e-05	6.45232e-05	1.32043	1.32868e-05	2.62474e-05	0.408342	-1.29215
Aminoadipic acid	160.062	1.72199e-05	4.20961e-05	1.25425	2.55833e-05	4.1166e-05	0.409062	-1.28961
3-ureidopropionate	131.046	0.000393913	0.000925596	1.36855	5.29724e-05	7.29675e-05	0.425577	-1.23251
L-Asparagine	131.046	0.000393913	0.000925596	1.36855	5.29724e-05	7.29675e-05	0.425577	-1.23251
Pregnanediol	319.264	0.000219189	0.000510605	1.38796	5.48933e-08	4.73276e-07	0.429273	-1.22003
Hypotaurine	108.012	1.33695e-05	3.02024e-05	1.13173	0.016124	0.00624829	0.442664	-1.17572
Arachidonic Acid	303.233	0.00978363	0.0222019	1.38288	0.000129462	0.000136755	0.440666	-1.18224
N-Acetylglutamic acid	188.056	7.36922e-06	1.65396e-05	1.20807	0.00340896	0.00174905	0.445549	-1.16634
5-L-Glutamyl-L-alanine	217.083	7.87787e-06	1.72113e-05	1.20873	0.000669728	0.00047303	0.457716	-1.12748
N-Formylmethionine	176.038	6.80213e-05	0.000149285	1.34715	9.63512e-07	4.58276e-06	0.455647	-1.13401
Gaidic acid	253.217	0.00455171	0.00997672	1.35491	7.09287e-06	1.72524e-05	0.456232	-1.13216
(S)-2-Methylmalate/(R)-2-Methylmalate	147.03	0.000146042	0.000311734	1.17491	0.00405036	0.00198596	0.468483	-1.09393
2-Hydroxyglutarate	147.03	0.000146042	0.000311734	1.17491	0.00405036	0.00198596	0.468483	-1.09393
Oleic Acid/Elaidic Acid/Vaccenic acid/Petroselinic acid	281.249	0.0196411	0.0401534	1.37359	1.46142e-06	6.12165e-06	0.489153	-1.03164
ribose 5-phosphate	229.011	0.000402297	0.000794641	1.11884	0.00180116	0.00104581	0.506263	-0.982042
Alpha-Linolenic acid	277.217	0.000262215	0.000512847	1.31781	1.61491e-05	3.01384e-05	0.511293	-0.967778
L-proline	114.056	0.000993171	0.0019102	1.33372	9.39074e-06	2.08261e-05	0.519932	-0.943606
Galactitol	181.071	0.000446571	0.000858652	1.23497	0.000120886	0.00012904	0.520083	-0.943185
Sorbitol	181.071	0.000446571	0.000858652	1.23497	0.000120886	0.00012904	0.520083	-0.943185
Iditol/Mannitol/Dulcitol	181.072	0.000446888	0.000858643	1.23907	0.000113881	0.000124452	0.520458	-0.942146
Lipoxin B4/Lipoxin A4/Prostaglandin I2/Thromboxane A2	351.218	4.29307e-05	8.19665e-05	1.20902	0.00104637	0.00064758	0.523759	-0.933025
Prostaglandin E2	351.218	4.29307e-05	8.19665e-05	1.20902	0.00104637	0.00064758	0.523759	-0.933025
D-Glutamic acid	146.045	0.0125124	0.0235655	1.21629	0.000406616	0.000325883	0.530963	-0.913316
L-glutamic acid	146.045	0.0125124	0.0235655	1.21629	0.000406616	0.000325883	0.530963	-0.913316
N-Acetylserine	146.045	0.0125124	0.0235655	1.21629	0.000406616	0.000325883	0.530963	-0.913316
N-methyl-D-aspartic acid	146.045	0.0125124	0.0235655	1.21629	0.000406616	0.000325883	0.530963	-0.913316
O-Acetyl-L-serine	146.045	0.0125124	0.0235655	1.21629	0.000406616	0.000325883	0.530963	-0.913316
D-Arabinose 5-phosphate/D-Ribulose 5-phosphate	229.012	0.000490324	0.000906305	1.03593	0.0122531	0.00494536	0.541014	-0.886262
2-amino-2-methylpropanoate	102.056	0.00012363	0.000226388	1.21457	0.000313901	0.000271422	0.546097	-0.872771
3-aminoisobutanoate	102.056	0.00012363	0.000226388	1.21457	0.000313901	0.000271422	0.546097	-0.872771
4-aminobutanoate	102.056	0.00012363	0.000226388	1.21457	0.000313901	0.000271422	0.546097	-0.872771
D-Alpha-aminobutyric acid	102.056	0.00012363	0.000226388	1.21457	0.000313901	0.000271422	0.546097	-0.872771
gama-Aminobutryic acid (GABA)	102.056	0.00012363	0.000226388	1.21457	0.000313901	0.000271422	0.546097	-0.872771
L-(+)-2-Aminobutyric acid	102.056	0.00012363	0.000226388	1.21457	0.000313901	0.000271422	0.546097	-0.872771
Linolenic acid	279.233	0.00290981	0.00512293	1.27186	4.34319e-05	6.23704e-05	0.567998	-0.816041
L-methionine	148.043	0.000551332	0.000958749	1.34662	1.23614e-06	5.47345e-06	0.575053	-0.798233
Gluconic acid	195.05	0.000122425	0.000212924	1.11292	0.026882	0.00956654	0.574971	-0.798439
Sulfoacetate	138.971	7.40344e-05	0.000123678	1.09331	0.00178923	0.0010399	0.598607	-0.740319
FAD (flavin adenine dinucleotide)	784.149	2.12752e-05	3.46486e-05	1.25013	0.000214101	0.000205281	0.614026	-0.703627
Hypoxanthine	135.031	0.0145693	0.0231268	1.24879	0.00023015	0.000216873	0.629975	-0.666635
Eicosanoic acid	309.279	0.0013267	0.00212021	1.33545	3.62922e-06	1.11166e-05	0.625741	-0.676363
L-Methionine S-oxide	164.039	4.79781e-05	7.53207e-05	1.12905	0.00074415	0.000511162	0.636984	-0.650671
3-Amino-4-methylpentanoic acid	130.087	0.00392622	0.00613338	1.33601	2.53757e-06	8.56155e-06	0.64014	-0.643541
L-Leucine	130.087	0.00392622	0.00613338	1.33601	2.53757e-06	8.56155e-06	0.64014	-0.643541
cis-4-Hydroxy-D-proline	130.05	0.000163954	0.000248052	1.27874	9.95411e-05	0.000114344	0.660968	-0.597348
N-acetyl-L-alanine	130.05	0.000163954	0.000248052	1.27874	9.95411e-05	0.000114344	0.660968	-0.597348
trans-4-hydroxyproline	130.05	0.000163954	0.000248052	1.27874	9.95411e-05	0.000114344	0.660968	-0.597348
allothreonine	118.05	0.00231168	0.00345178	1.19712	0.000691345	0.000484257	0.669707	-0.578398
L-threonine	118.05	0.00231168	0.00345178	1.19712	0.000691345	0.000484257	0.669707	-0.578398
Adonitol	151.061	0.000216821	0.00032108	1.29888	9.81638e-05	0.000113318	0.675285	-0.566431
Arabitol/Ribitol/Xylitol	151.061	0.000216821	0.00032108	1.29888	9.81638e-05	0.000113318	0.675285	-0.566431
D-Arabitol	151.061	0.000216821	0.00032108	1.29888	9.81638e-05	0.000113318	0.675285	-0.566431
D-Xylitol	151.061	0.000216821	0.00032108	1.29888	9.81638e-05	0.000113318	0.675285	-0.566431
L-Arabitol	151.061	0.000216821	0.00032108	1.29888	9.81638e-05	0.000113318	0.675285	-0.566431
beta-alanine	88.0399	0.000508076	0.000735596	1.10234	0.00331371	0.00171198	0.690699	-0.53387
D-alanine	88.0399	0.000508076	0.000735596	1.10234	0.00331371	0.00171198	0.690699	-0.53387
L-alanine	88.0399	0.000508076	0.000735596	1.10234	0.00331371	0.00171198	0.690699	-0.53387
sarcosine	88.0399	0.000508076	0.000735596	1.10234	0.00331371	0.00171198	0.690699	-0.53387
fumarate	115.003	0.000230045	0.000332319	1.21743	0.000322636	0.000276598	0.69224	-0.530655
Maleic acid	115.003	0.000230045	0.000332319	1.21743	0.000322636	0.000276598	0.69224	-0.530655
5-aminopentanoate	116.071	0.00202273	0.00287654	1.32133	6.44583e-06	1.63058e-05	0.703184	-0.508027
L-norvaline	116.071	0.00202273	0.00287654	1.32133	6.44583e-06	1.63058e-05	0.703184	-0.508027
L-valine	116.071	0.00202273	0.00287654	1.32133	6.44583e-06	1.63058e-05	0.703184	-0.508027
N-Methyl-a-aminoisobutyric acid	116.072	0.00202273	0.00287654	1.32133	6.44583e-06	1.63058e-05	0.703184	-0.508027
5-oxo-D-proline	128.035	0.00105036	0.00147523	1.22118	0.00194604	0.00111668	0.711995	-0.490062
Pyroglutamic acid	128.035	0.00105036	0.00147523	1.22118	0.00194604	0.00111668	0.711995	-0.490062
Pyrrolidonecarboxylic acid	128.035	0.00105036	0.00147523	1.22118	0.00194604	0.00111668	0.711995	-0.490062
L-Isoleucine	130.087	0.00303461	0.00401923	1.15675	0.00125342	0.000761949	0.755024	-0.405405
L-Phenylalanine	164.071	0.00273346	0.00353222	1.14139	0.00156851	0.000928412	0.773864	-0.369848
16-Hydroxypalmitic acid	271.228	0.000373238	0.00021899	1.31196	2.21288e-05	3.74995e-05	1.70436	0.769234
Tetracosanoic acid	367.358	0.000526727	0.000280321	1.25958	0.00047437	0.000366016	1.87902	0.909978
lauroylcarnitine	342.264	0.000541539	0.000253175	1.26236	0.000120941	0.000129075	2.13899	1.09693
2-hydroxyphenylacetic acid	151.04	9.10651e-05	4.18041e-05	1.15165	0.00101153	0.000633247	2.17838	1.12325
2-Methoxybenzoic acid	151.04	9.10651e-05	4.18041e-05	1.15165	0.00101153	0.000633247	2.17838	1.12325
3,4-Dihydroxyphenylacetaldehyde	151.04	9.10651e-05	4.18041e-05	1.15165	0.00101153	0.000633247	2.17838	1.12325
3-Methoxybenzoic acid	151.04	9.10651e-05	4.18041e-05	1.15165	0.00101153	0.000633247	2.17838	1.12325
4-hydroxyphenylacetate	151.04	9.10651e-05	4.18041e-05	1.15165	0.00101153	0.000633247	2.17838	1.12325
Mandelic acid	151.04	9.10651e-05	4.18041e-05	1.15165	0.00101153	0.000633247	2.17838	1.12325
Estrone glucuronide	445.187	0.00651328	0.0029375	1.34411	6.1678e-06	1.58754e-05	2.21729	1.14879
Cytarabine	242.078	0.00036682	9.69843e-05	1.32685	1.52502e-06	6.29215e-06	3.78227	1.91925
Cytidine	242.078	0.00036682	9.69843e-05	1.32685	1.52502e-06	6.29215e-06	3.78227	1.91925
NAD (Nicotinamide adenine dinucleotide)	662.101	0.000160273	3.12196e-05	1.35594	0.00253861	0.00139005	5.13373	2.36001
Uridine 5'-diphosphogalactose	565.047	0.000739342	0.000137367	1.27211	6.7831e-05	8.78526e-05	5.38225	2.42821
uridine 5'-diphosphoglucose	565.047	0.000739342	0.000137367	1.27211	6.7831e-05	8.78526e-05	5.38225	2.42821
D-Glutamylglycine	203.067	0.000176529	1.82929e-05	1.41904	3.42986e-05	5.14125e-05	9.65018	3.27056
Adenosine 5'-monophosphate	346.056	0.00140807	0.000123422	1.42089	1.12543e-05	2.3576e-05	11.4086	3.51205
2'-Deoxyguanosine 5'-monophosphate	346.056	0.00151458	0.00011407	1.41014	1.63372e-06	6.57205e-06	13.2776	3.73092
Uridine 5'-monophosphate	323.028	0.0023922	0.000169366	1.42038	1.37878e-05	2.68597e-05	14.1244	3.82012
ophthalmic acid	288.12	0.000270548	9.16174e-06	1.40048	7.7642e-06	1.82099e-05	29.5301	4.88412
Inosine 5'-phosphate	347.039	0.000398179	1.06133e-05	1.34927	6.42515e-05	8.44316e-05	37.5168	5.22947
L-Arginine	173.104	0.000397182	9.94978e-06	1.42041	9.69881e-06	2.13027e-05	39.9187	5.31899
guanosine 5'-monophosphate	362.05	0.000201041	3.20834e-06	1.36086	0.000384745	0.000313677	62.6621	5.96952
Guanosine	282.084	0.000645812	0.000286573	1.14031	0.00186232	0.00107593	2.25357	1.17221
2-keto valeric acid	115.04	0.000870258	0.000468592	1.16785	0.000962095	0.000612334	1.85718	0.893112
Glutarate semialdehyde	115.04	0.000870258	0.000468592	1.16785	0.000962095	0.000612334	1.85718	0.893112
4-Nitrophenol	138.02	0.000931752	0.000570357	1.39824	3.47081e-05	5.18595e-05	1.63363	0.708083
6-hydroxynicotinate	138.019	0.000931752	0.000570357	1.39824	3.47081e-05	5.18595e-05	1.63363	0.708083
2-Hydroxyadenine	150.042	0.00107706	0.00055293	1.06331	0.00523049	0.00244	1.94791	0.96193
Guanine	150.042	0.00107706	0.00055293	1.06331	0.00523049	0.00244	1.94791	0.96193
Sebacic acid	201.113	7.33831e-05	3.29376e-05	1.11111	0.0332959	0.0113873	2.22794	1.15571
Fucose 1-phosphate/L-Fuculose 1-phosphate	243.028	0.000329117	0.000178212	1.15726	0.00194227	0.00111486	1.84677	0.885002
2-Hydroxy-3-methylbutyric acid	117.056	0.000270711	0.000166428	1.29048	0.000116254	0.00012603	1.62659	0.701853
3-amino-4-hydroxybenzoic acid	152.035	0.000288437	0.000176452	1.20431	0.00054496	0.000405191	1.63465	0.708982
3-amino-5-hydroxybenzoic acid	152.035	0.000288437	0.000176452	1.20431	0.00054496	0.000405191	1.63465	0.708982
3-Hydroxy-2-methylpyridine-5-carboxylate	152.035	0.000288437	0.000176452	1.20431	0.00054496	0.000405191	1.63465	0.708982
3-hydroxyanthranilate	152.035	0.000288437	0.000176452	1.20431	0.00054496	0.000405191	1.63465	0.708982
Uridine	243.062	0.00395162	0.00208323	1.08723	0.00692767	0.00308957	1.89687	0.92362
N-Acetylaspartylglutamic acid	303.083	0.00193816	0.00101483	1.08093	0.00350298	0.00178514	1.90983	0.933447
Arachidic Acid	311.296	0.000627023	0.000459452	1.08038	0.00696359	0.00310278	1.36472	0.448606
Phytanic Acid	311.296	0.000627023	0.000459452	1.08038	0.00696359	0.00310278	1.36472	0.448606
Stearic Acid ethyl ester	311.296	0.000627023	0.000459452	1.08038	0.00696359	0.00310278	1.36472	0.448606
3,3-Dimethylglutaric acid	159.066	7.37021e-05	4.30286e-05	1.06031	0.00340001	0.00174559	1.71287	0.776412
6-carboxyhexanoate	159.066	7.37021e-05	4.30286e-05	1.06031	0.00340001	0.00174559	1.71287	0.776412
Pimelic acid	159.066	7.37021e-05	4.30286e-05	1.06031	0.00340001	0.00174559	1.71287	0.776412
citrate	191.019	0.00580475	0.00424839	1.09545	0.0037992	0.00189574	1.36634	0.450319
isocitric acid	191.019	0.00580475	0.00424839	1.09545	0.0037992	0.00189574	1.36634	0.450319
Azelaic acid	187.098	0.000126306	7.83999e-05	1.18972	0.00119942	0.000732517	1.61105	0.688001
Suberic acid	173.082	6.1987e-05	3.8739e-05	1.09332	0.0044838	0.00215014	1.60012	0.678179
3-Methyl-2-oxovaleric acid/2-Ketohexanoic acid	129.056	0.000694761	0.000447699	1.20582	0.000635671	0.000454957	1.55185	0.63399
Sulfate	96.9601	0.00506479	0.00366817	1.05689	0.00719968	0.00318907	1.38074	0.465441
5-Amino-4-imidazole carboxylate	126.031	0.00019284	0.000124609	1.21361	0.00041153	0.000328569	1.54756	0.629991
Indole	116.051	0.000134011	9.57791e-05	1.16527	0.00070326	0.000490366	1.39917	0.48457
2-Dehydropantoate/4-Hydroxy-2-oxohexanoic acid/(S)-2-Aceto-2-hydroxybutanoic acid/3-Hydroxy-5-oxohexanoate	145.051	0.000207641	0.000133051	1.25071	0.00029668	0.000260952	1.56062	0.642118
3-methyglutaric acid	145.05	0.000207641	0.000133051	1.25071	0.00029668	0.000260952	1.56062	0.642118
Adipic acid	145.051	0.000207641	0.000133051	1.25071	0.00029668	0.000260952	1.56062	0.642118
2-Phenylpropionate	149.061	6.44707e-05	4.12135e-05	1.10796	0.0096709	0.00405227	1.56431	0.645524
3-Methylphenylacetic acid	149.061	6.44707e-05	4.12135e-05	1.10796	0.0096709	0.00405227	1.56431	0.645524
4-Coumaryl alcohol	149.061	6.44707e-05	4.12135e-05	1.10796	0.0096709	0.00405227	1.56431	0.645524
Hydrocinnamic acid	149.061	6.44707e-05	4.12135e-05	1.10796	0.0096709	0.00405227	1.56431	0.645524
Valproic acid	143.108	0.000317631	0.000203925	1.08771	0.00284079	0.00152003	1.55758	0.639309
2'-deoxyguanosine 5'-triphosphate	505.988	8.08861e-05	5.63504e-05	1.12047	0.00299481	0.00158403	1.43541	0.521466
Adenosine triphosphate	505.988	8.08861e-05	5.63504e-05	1.12047	0.00299481	0.00158403	1.43541	0.521466
4-Hydroxyphenylpyruvic acid	179.035	0.000123964	8.5792e-05	1.22708	0.000174607	0.000174951	1.44493	0.531002
caffeate	179.034	0.000123964	8.5792e-05	1.22708	0.000174607	0.000174951	1.44493	0.531002
3-Hydroxycapric acid	187.134	0.000144218	9.50035e-05	1.03293	0.0091112	0.00386479	1.51802	0.602195
4-chloro-L-phenylalanine	198.033	0.430844	0.29084	1.35333	2.17888e-05	3.71175e-05	1.48138	0.566942
Cytidine monophosphate N-acetylneuraminic acid	613.14	0.000118277	7.77282e-05	1.21007	0.00139361	0.000837111	1.52168	0.605665
Ricinoleic acid	297.244	0.000681219	0.000453294	1.0086	0.0351656	0.0118917	1.50282	0.587671
3-Methylthiopropionic acid	119.017	0.000517677	0.000350391	1.10122	0.00948887	0.0039918	1.47743	0.563086
(3S)-3,6-Diaminohexanoate/(3S,5S)-3,5-Diaminohexanoate	145.098	0.000354664	0.000639438	1.19611	0.000553342	0.000409654	0.554649	-0.850353
D-Glucose 1-phosphate	259.022	0.000164506	0.00207893	1.27733	0.0105505	0.00434505	0.0791302	-3.65963
D-Glucose-6-phosphate	259.022	0.000164506	0.00207893	1.27733	0.0105505	0.00434505	0.0791302	-3.65963
D-mannose 6-phosphate	259.022	0.000164506	0.00207893	1.27733	0.0105505	0.00434505	0.0791302	-3.65963
Glycerate 3-phosphate	184.986	0.000494058	0.0013545	1.05896	0.0165194	0.00637553	0.364753	-1.45501
Threonic acid	135.03	2.41686e-05	8.37497e-05	1.23646	0.000948211	0.000606334	0.288582	-1.79295
5,6-Epoxy-8,11,14-eicosatrienoic acid/5-HETE	319.228	0.000125116	0.000401691	1.40819	0.000106702	0.000119517	0.311473	-1.68282
5-Aminolevulinic acid	130.05	0.000163954	0.000248052	1.27874	9.95411e-05	0.000114344	0.660968	-0.597348
5-Hydroxyisourate	183.016	8.02997e-07	5.86827e-05	1.42348	1.96075e-05	3.45676e-05	0.0136837	-6.1914
deoxyribose	133.05	0.000252289	0.000126921	1.1325	0.00283499	0.0015176	1.98777	0.991147
Glyceraldehyde 3-phosphate	168.99	7.02144e-05	0.000555161	1.12088	0.00566657	0.0026099	0.126476	-2.98307
Glyceric acid	105.019	0.0159233	0.00974412	1.2479	0.000430647	0.000340234	1.63415	0.708538
Glycyl-glycine	131.046	0.000393913	0.000925596	1.36855	5.29724e-05	7.29675e-05	0.425577	-1.23251
IDP	427.006	8.02997e-07	9.36081e-05	1.18911	0.0154905	0.0060422	0.00857828	-6.8651
L-Erythrulose	119.035	0.172259	0.0990773	1.35645	1.38702e-06	5.91546e-06	1.73863	0.797954
L-Norleucine	130.087	0.00392622	0.00613338	1.33601	2.53757e-06	8.56155e-06	0.64014	-0.643541
N-methyl-L-glutamate	160.061	1.72199e-05	4.20961e-05	1.25425	2.55833e-05	4.1166e-05	0.409062	-1.28961
octulose-1,8-bisphosphate (OBP)	399.01	8.02997e-07	2.89673e-05	1.12933	0.0359098	0.0120893	0.0277208	-5.17289
Quinolinic acid	166.015	0.000175139	3.95919e-05	1.08516	0.00416465	0.00202599	4.4236	2.14522
Ribulose 1,5-diphosphate	308.978	8.02997e-07	2.18665e-05	1.14673	0.0430243	0.0138933	0.0367227	-4.76718
S-carboxymethyl-L-cysteine	178.017	1.73552e-06	2.40894e-05	1.27678	0.024663	0.00890176	0.0720451	-3.79496
Xanthosine 5'-monophosphate	363.035	8.02997e-07	1.54874e-05	1.1763	0.00829272	0.00358216	0.0518485	-4.26956
Carnosine	225.099	8.02997e-07	8.6767e-06	1.41068	0.000284123	0.000253088	0.0925463	-3.43368
Cytidine diphosphate choline	487.1	1.46835e-05	8.55536e-07	1.1903	0.00758875	0.00333064	17.1629	4.10123
GDP-L-fucose	588.075	1.40793e-05	9.70032e-07	1.36114	0.000832035	0.000553829	14.5143	3.8594
adenosine-5'-diphosphoglucose	588.074	1.40793e-05	9.70032e-07	1.36114	0.000832035	0.000553829	14.5143	3.8594
N-Acetyl-L-phenylalanine	206.082	7.05759e-06	1.1944e-05	1.16833	0.00826117	0.00357105	0.590889	-0.759041
Phenylglyoxylic acid	149.024	2.18444e-05	1.39665e-05	1.00184	0.0120034	0.00485756	1.56405	0.645291
Tetradecanedioic acid	257.176	1.98126e-05	1.11379e-05	1.08179	0.0032111	0.00167146	1.77883	0.830931
Biotin	243.081	2.66454e-05	7.86381e-06	1.04384	3.43966e-05	5.15198e-05	3.38835	1.76058
15-Keto-prostaglandin E2	349.202	2.73406e-06	2.27211e-05	1.23001	0.0033227	0.0017155	0.120331	-3.05492
Prostaglandin F2a	353.233	9.9343e-06	2.36615e-05	1.3787	0.000563312	0.000414913	0.419851	-1.25205
S-Glutathionyl-L-cysteine	425.081	3.01545e-06	2.62299e-05	1.22367	0.0040463	0.00198453	0.114962	-3.12077
D-Erythrose 4-phosphate	199.001	1.34025e-05	5.43413e-05	1.04517	0.000465653	0.000360973	0.246635	-2.01955
Dehydroascorbic acid	173.009	6.3602e-05	2.02622e-05	1.16203	0.0182551	0.0069222	3.13895	1.65028
cis-Aconitic acid	173.009	6.3602e-05	2.02622e-05	1.16203	0.0182551	0.0069222	3.13895	1.65028
trans-aconitate	173.009	6.3602e-05	2.02622e-05	1.16203	0.0182551	0.0069222	3.13895	1.65028
Norepinephrine	168.067	1.04262e-05	8.17815e-05	1.28631	3.35107e-07	1.98165e-06	0.127489	-2.97156
Pyridoxine	168.066	1.04262e-05	8.17815e-05	1.28631	3.35107e-07	1.98165e-06	0.127489	-2.97156
N-Acetylneuraminic acid	308.098	1.645e-05	0.000105412	1.33274	7.93477e-06	1.84424e-05	0.156055	-2.67988
1-methyladenosine	280.105	1.9287e-05	4.28105e-05	1.28668	1.8926e-05	3.3734e-05	0.450521	-1.15033
2-Amino-3-methoxybenzoic Acid	166.051	0.000121082	6.17869e-05	1.07447	0.00478041	0.0022624	1.95967	0.970611
3-Hydroxybutyric acid	103.04	0.000157229	9.90503e-05	1.04842	0.00331089	0.00171087	1.58737	0.666636
3-Phosphonoalanine	168.007	5.11851e-06	9.65613e-07	1.07594	0.00620333	0.00281784	5.30079	2.40621
4-hydroxy-L-phenylglycine	166.05	0.000121082	6.17869e-05	1.07447	0.00478041	0.0022624	1.95967	0.970611
5-Aminoimidazole ribonucleotide	294.05	8.02997e-07	6.65852e-06	1.34569	0.0125788	0.00505913	0.120597	-3.05174
6-sulfatoxymelatonin	327.066	7.8318e-05	4.96671e-05	1.06743	0.0043438	0.00209612	1.57686	0.657054
8,9-DiHETrE	337.238	0.000191479	7.36773e-05	1.30896	3.10173e-06	9.90473e-06	2.59888	1.37789
Bicine	162.077	2.95101e-06	8.37503e-06	1.06125	0.000497587	0.000379223	0.352359	-1.50488
Cytidine 5'-monophosphate	322.044	0.000188538	9.14986e-05	1.26323	8.69685e-05	0.000104591	2.06055	1.04303
D-Galactosamine	178.072	8.02997e-07	1.21163e-05	1.15703	0.00548213	0.00253709	0.0662742	-3.91541
Deoxyribose 1-phosphate/1-Deoxy-D-xylulose 5-phosphate	213.017	0.000953444	0.000433773	1.03408	0.000908357	0.000588794	2.19803	1.13621
Diethylphosphate	153.032	8.02997e-07	1.98723e-05	1.41957	0.000147468	0.000152476	0.0404078	-4.62922
Ergothioneine	228.081	2.59779e-06	9.46026e-06	1.10922	0.000311573	0.000270028	0.2746	-1.8646
Geranyl pyrophosphate	313.061	8.02997e-07	8.49394e-06	1.30164	0.0160717	0.00623137	0.0945376	-3.40297
Geranylgeranyl diphosphate	449.186	7.6411e-06	7.77491e-07	1.1737	0.00464059	0.00220985	9.82789	3.29688
Mevalonic acid-5P	227.033	0.000230943	0.000113731	1.24916	0.000344444	0.000290045	2.0306	1.02191
N-Acetyl-D-galactosamine	220.082	4.70782e-06	2.59577e-05	1.15764	1.39969e-05	2.71104e-05	0.181365	-2.46303
N-Acetyl-D-glucosamine	220.082	4.70782e-06	2.59577e-05	1.15764	1.39969e-05	2.71104e-05	0.181365	-2.46303
N-Acetyl-D-mannosamine	220.082	4.70782e-06	2.59577e-05	1.15764	1.39969e-05	2.71104e-05	0.181365	-2.46303
N-acetyl-L-cysteine	162.023	8.02997e-07	4.59186e-06	1.32213	0.0203458	0.00755584	0.174874	-2.51561
Nitrotyrosine	225.051	1.17712e-05	6.54282e-06	1.10897	0.00397718	0.00196	1.7991	0.847274
Paraxanthine	179.057	0.000257696	0.000956925	1.38937	7.18541e-08	5.01021e-07	0.269296	-1.89274
Pyridoxal	166.051	0.000121082	6.17869e-05	1.07447	0.00478041	0.0022624	1.95967	0.970611
Quercetin	301.035	2.32169e-06	2.10446e-05	1.24784	0.0204766	0.00759461	0.110322	-3.1802
Sphinganine 1-phosphate	380.257	6.97419e-05	1.37267e-05	1.05432	3.18538e-05	4.86825e-05	5.08074	2.34504
Taurochenodeoxycholic acid	498.289	8.02997e-07	3.17305e-06	1.40042	0.000268992	0.000243341	0.253068	-1.9824
Theobromine/Paraxanthine/Theophylline	179.057	0.000205151	0.000751891	1.33826	0.00214662	0.0012121	0.272847	-1.87384
Theophylline	179.057	0.000257696	0.000956925	1.38937	7.18541e-08	5.01021e-07	0.269296	-1.89274
Ureidosuccinic acid	175.036	8.02997e-07	2.77686e-06	1.0988	0.0191771	0.00720489	0.289174	-1.78999
aniline-2-sulfonic acid	172.007	8.02997e-07	1.53484e-05	1.16811	0.012486	0.00502678	0.052318	-4.25655
dCDP	386.016	1.58014e-05	7.00654e-06	1.22243	0.000185313	0.00018344	2.25523	1.17328
dIMP	331.045	4.00687e-05	8.28393e-05	1.28828	2.34982e-05	3.89986e-05	0.483693	-1.04784
dTMP	321.049	4.35207e-06	7.49689e-07	1.14071	0.00802589	0.00348776	5.80517	2.53734
erythritol	121.05	8.02997e-07	3.74959e-06	1.11162	0.00974248	0.00407592	0.214156	-2.22327
monodehydroascorbate	174.016	5.77518e-05	0.000236476	1.36072	3.88041e-07	2.22666e-06	0.244218	-2.03376
octulose-monophosphate (O8P-O1P)	319.044	1.27333e-06	4.54724e-05	1.38518	0.0021151	0.00119731	0.0280022	-5.15832
tetraiodothyroacetate ester glucuronide	921.677	8.02997e-07	7.13605e-06	1.13365	0.00905109	0.00384438	0.112527	-3.15166
thiopurine s-methylether	165.024	0.000153779	7.98457e-05	1.00392	0.0248576	0.00896082	1.92595	0.945572
