# Supplementary material for: Boosting ATM activity alleviates aging and extends lifespan in a mouse model of progeria
Source: eLife journal article supplement (doi:10.7554/elife.34836), 2018-05-02
Supplement: supp [file elife-34836-supp-v1.zip › elife_poa_e34836_Figure_2_source_data_3.xlsx]

## Sheet: Sirt6KO Vs WT
Gene symbol	Base meana		log2 Fold Change	Fold Change	p-valueb	FDRc
	Sirt6 KO	WT
Lipo1	10.8484	0.0293337	8.37066	330.993	6.58373e-308	4.08278e-306		a mean of RPKM for all samples，RPKM:Reads Per Kilobases per Millionreads
Gcnt4	9.64408	0.25539	5.13383	35.1105	7.9127e-308	4.88549e-306		b Exact Negative Binomial Test
Tm4sf1	136.954	703.342	-2.45822	0.181971	2.34786e-307	1.44332e-305		c BH adjusted p-values
Abcg2	6.65402	55.8145	-3.16453	0.111527	1.06525e-305	6.52015e-304
Myct1	9.99624	0.0216378	8.67766	409.483	7.49959e-299	4.57055e-297
Glrx	117.384	15.6394	2.80993	7.0125	1.67963e-297	1.01924e-295
Arrdc3	19.9236	1.85114	3.32959	10.0532	6.74012e-296	4.07259e-294
Prune2	3.61065	0.0677553	5.63395	49.6578	1.26863e-294	7.63286e-293
Robo1	5.92007	0.141166	5.29088	39.1484	1.03325e-293	6.19032e-292
Jph2	9.31468	0.193903	5.48065	44.652	6.50808e-293	3.8826e-291
Srgap1	0.389578	7.11	-4.28625	0.051252	1.29628e-292	7.70089e-291
Ddc	0.03031	13.8539	-8.84554	0.00217384	1.46229e-292	8.65077e-291
Heg1	6.48466	40.2382	-2.73124	0.150597	3.1236e-291	1.84019e-289
Bhlhe40	17.4082	75.1151	-2.20735	0.216532	6.1036e-291	3.58086e-289
Vcam1	64.9444	274.903	-2.1793	0.220783	8.73844e-291	5.10549e-289
Mrgprf	22.317	0.982787	4.40442	21.1769	2.77789e-289	1.61632e-287
Maf	4.04005	26.9594	-2.83585	0.140064	3.45212e-289	2.00039e-287
Upk3b	0.155653	54.9406	-8.54806	0.00267165	5.56427e-287	3.21115e-285
Emb	79.4521	15.7655	2.23566	4.70979	9.59793e-286	5.51647e-284
St3gal1	3.65693	27.8055	-3.02385	0.122951	2.65134e-285	1.5177e-283
Irx1	16.0209	0.328579	5.50263	45.3375	5.2925e-284	3.01736e-282
Ank	183.818	10.7278	4.00122	16.0135	5.37438e-284	3.05174e-282
Rasgrf2	0.0104682	4.24041	-8.67111	0.00245321	6.49618e-284	3.67398e-282
Rnf144a	6.46891	0.0769269	6.28172	77.8011	5.16467e-283	2.90929e-281
Car5b	16.9226	0.730274	4.43439	21.6214	1.57971e-282	8.86333e-281
Tmem47	7.2823	0.0661898	6.67091	101.893	2.20265e-282	1.23096e-280
Ttyh3	48.2097	8.24326	2.45002	5.46425	1.1277e-281	6.27741e-280
Inhbb	0.0647892	6.48989	-6.7265	0.00944328	2.24501e-279	1.24479e-277
Stk17b	4.39595	24.7012	-2.5884	0.16627	2.67457e-278	1.47718e-276
Srpx2	9.51809	0.055359	7.29209	156.725	1.24963e-277	6.87493e-276
Lrrc17	24.4978	0.405337	5.81483	56.291	1.78e-276	9.75483e-275
Efna5	5.87668	32.2875	-2.55538	0.17012	2.50704e-276	1.36861e-274
Pcdhgb6	6.63217	0.114769	5.74427	53.6042	2.81349e-276	1.53e-274
Xdh	3.96587	28.8301	-2.95941	0.128566	5.64625e-275	3.05871e-273
Myl9	47.2335	0.930224	5.56559	47.3598	6.16138e-275	3.32503e-273
Gpm6a	0.0759946	49.8233	-9.43722	0.00144249	3.71663e-274	1.99808e-272
Plxna4	0.0353954	10.7257	-8.32121	0.00312655	2.30579e-272	1.23491e-270
Glis3	10.2188	0.536164	4.15181	17.7753	2.87825e-270	1.53568e-268
Cobll1	8.45703	35.8279	-2.18098	0.220526	3.34563e-270	1.77834e-268
Slc35f2	0.0155077	9.3759	-9.17241	0.00173312	7.67337e-270	4.06344e-268
Eya4	31.4191	6.18374	2.24685	4.74644	4.60499e-268	2.42947e-266
Sort1	1.05832	20.4575	-4.37167	0.0483054	5.21334e-268	2.7402e-266
Wisp1	9.94002	79.3846	-3.09549	0.116995	5.7915e-268	3.03281e-266
Manba	0.649091	13.7148	-4.49699	0.0442865	4.19834e-267	2.19042e-265
Mt2	526.824	53.7095	3.19649	9.16725	5.0518e-267	2.62601e-265
Rras2	19.2914	88.5139	-2.29556	0.203689	1.9212e-264	9.95014e-263
Gm7694	0.0264321	6.40157	-7.95542	0.00402883	4.07798e-264	2.10433e-262
Pstpip1	2.06142	29.658	-3.94442	0.0649547	4.47542e-264	2.30101e-262
Six1	31.7409	1.35263	4.45377	21.9138	7.9178e-264	4.05615e-262
4931428F04Rik	9.85784	0.255074	5.16897	35.9761	8.71567e-264	4.44877e-262
Sfrp1	0.959127	10.4053	-3.53714	0.0861421	8.13348e-263	4.13667e-261
Dpysl3	9.28704	0.633254	3.77451	13.6849	1.57996e-260	8.00682e-259
Foxc1	19.6808	2.66711	2.78476	6.8912	4.50702e-259	2.27588e-257
Mical2	35.2266	142.488	-2.11428	0.230961	6.76275e-259	3.4028e-257
Myo7a	0.290784	6.43687	-4.56105	0.042363	1.64557e-258	8.25063e-257
Snx10	3.26606	33.0516	-3.43591	0.0924037	7.95572e-258	3.97477e-256
Sox11	4.31163	0.126207	4.9928	31.8407	2.1408e-257	1.0658e-255
Cacna2d1	5.31001	0.188	4.71586	26.2795	2.40274e-257	1.19201e-255
Ly6c1	74.2328	6.06744	3.51491	11.4313	8.68585e-257	4.29403e-255
4931406P16Rik	6.61697	26.0193	-2.0731	0.237648	1.42833e-256	7.03665e-255
A630033H20Rik	12.0941	0.177896	5.97298	62.8127	1.60632e-256	7.88603e-255
P3h3	18.0954	1.20401	3.81047	14.0303	3.86307e-256	1.88996e-254
Gprc5c	17.599	0.247422	6.04243	65.9104	5.42043e-256	2.64274e-254
Fndc3c1	5.96693	0.0311793	7.45399	175.337	9.79743e-256	4.76034e-254
Gjb2	22.0238	0.161442	6.9788	126.133	1.89961e-253	9.19816e-252
Slco3a1	13.0445	1.10038	3.46819	11.067	1.50024e-252	7.23955e-251
Gstm1	118.029	11.6124	3.24766	9.49822	8.16371e-252	3.92608e-250
Twist2	51.2718	6.18038	2.95414	7.74972	1.65972e-251	7.95485e-250
Ptgs1	24.5628	185.891	-3.01786	0.123462	5.79167e-251	2.7665e-249
Mvd	65.8841	11.4915	2.42162	5.35772	2.10566e-250	1.00242e-248
Grik5	10.9603	0.431079	4.56853	23.7281	7.52937e-250	3.57241e-248
Cebpd	87.0349	16.8802	2.26845	4.81805	1.22812e-249	5.8075e-248
Cd24a	108.064	15.6658	2.68845	6.44619	1.27073e-249	5.98896e-248
Nell2	0.0513015	6.8257	-7.11517	0.00721309	1.42008e-249	6.6706e-248
Snx24	3.59869	28.3	-3.07151	0.118955	1.58345e-249	7.41338e-248
Mtmr11	35.5816	4.59293	2.85597	7.23989	7.1028e-249	3.31441e-247
Ncam1	11.2326	42.0127	-2.0011	0.24981	1.00618e-248	4.67973e-247
Ripk2	64.5239	10.2698	2.55306	5.86877	1.10824e-248	5.13749e-247
Fam20a	25.9616	1.53772	3.97993	15.779	1.37153e-248	6.33727e-247
Npr3	24.8445	0.911348	4.66978	25.4534	2.3948e-247	1.10293e-245
Il6st	192.018	42.5475	2.0761	4.21665	4.72097e-247	2.1672e-245
Sspn	7.61332	0.241902	4.8748	29.34	9.79257e-246	4.48082e-244
Pcx	31.0191	5.60644	2.36979	5.16866	2.95992e-245	1.35001e-243
Fam3c	102.201	18.5467	2.36455	5.14992	2.99929e-245	1.36357e-243
Gdnf	10.7074	0.71546	3.80272	13.9551	3.15106e-245	1.42798e-243
Tbc1d9	6.77474	0.321501	4.29546	19.6364	9.49605e-245	4.28961e-243
Ly9	0.0327213	9.41895	-8.204	0.00339117	3.38761e-244	1.5254e-242
Nnmt	0.0425161	28.7642	-9.36106	0.00152069	4.21946e-244	1.89394e-242
Mgll	0.706556	35.8823	-5.76044	0.0184474	4.16834e-243	1.86507e-241
Cacna1c	4.07133	0.464155	3.034	8.19078	4.67348e-243	2.08449e-241
Clip4	14.6956	0.790833	4.11658	17.3466	5.62076e-243	2.49912e-241
Agt	21.9441	0.140562	7.16642	143.651	1.28624e-242	5.70099e-241
Pvrl3	16.9432	0.530219	4.89632	29.7809	5.17648e-242	2.2872e-240
Prex2	1.39638	24.97	-4.25784	0.0522711	4.63476e-239	2.04146e-237
Etv4	6.37775	34.218	-2.52142	0.174171	4.84014e-239	2.1253e-237
Grem1	46.7986	3.56983	3.61348	12.2396	7.5379e-239	3.29964e-237
Tmtc2	0.0142867	4.94825	-8.45825	0.00284324	1.47476e-237	6.43569e-236
Slc39a14	55.0094	12.4951	2.04055	4.11403	1.83461e-236	7.98139e-235
Prss23	29.5536	165.855	-2.58623	0.16652	8.04124e-236	3.48758e-234
Lama4	0.085827	4.37601	-5.75712	0.0184899	2.84074e-234	1.22829e-232
Usp11	15.5249	1.34545	3.43004	10.7782	9.28517e-234	4.00253e-232
Fbn1	42.2482	10.342	1.93236	3.8168	1.04193e-233	4.47775e-232
Zc3h12a	22.4666	2.60623	3.00958	8.05331	2.00546e-233	8.5925e-232
Aim1	4.19461	16.1718	-2.0441	0.242474	2.89224e-233	1.23545e-231
Jph1	0.161615	5.47943	-5.17805	0.0276218	3.88748e-232	1.65557e-230
Kctd15	11.483	0.322141	5.05156	33.1644	4.91232e-232	2.08575e-230
Tbx3	5.10764	0.0937931	5.65748	50.4743	6.06449e-232	2.56724e-230
Creg1	5.84284	37.9549	-2.79794	0.143792	4.45388e-231	1.87981e-229
Slc2a6	10.168	0.0793171	6.87509	117.384	5.81762e-231	2.44808e-229
Pkhd1l1	0.00474702	2.3343	-8.93501	0.00204312	3.22483e-230	1.35299e-228
Ston1	28.0231	102.745	-1.97203	0.254893	8.26946e-230	3.45923e-228
Mterf4	23.2994	3.57963	2.60426	6.08081	1.71604e-228	7.15724e-227
Idi1	156.544	38.4542	1.92759	3.80418	2.4914e-228	1.03606e-226
Gp1bb	12.6471	0.2532	5.53512	46.3701	3.03257e-228	1.25741e-226
Fdps	314.479	87.6234	1.7458	3.35381	8.676e-227	3.58684e-225
Trib2	25.0283	5.18132	2.17438	4.51391	2.05471e-226	8.46986e-225
Arhgap20	3.49376	0.0376215	6.4202	85.6394	4.15951e-226	1.70963e-224
Plekha7	0.216575	11.1163	-5.77976	0.018202	6.66066e-225	2.72971e-223
Stk26	0.0250365	18.0719	-9.46466	0.00141532	5.58575e-224	2.28257e-222
Gm13139	2.95895	19.681	-2.83098	0.140536	2.72261e-223	1.10937e-221
Sox12	5.04077	20.5638	-2.12581	0.229123	2.51298e-222	1.021e-220
Disp1	8.89105	31.9959	-1.945	0.259714	2.92932e-222	1.18675e-220
Fam132b	0.0800787	8.76131	-6.85404	0.00864426	3.70269e-222	1.49578e-220
Foxg1	7.61978	0.349518	4.34379	20.3054	1.44685e-220	5.8282e-219
Col18a1	7.49716	0.522297	3.74501	13.4079	3.8486e-220	1.54589e-218
Dnm3os	14.7092	2.38346	2.52802	5.76778	1.11499e-219	4.46598e-218
Slc16a13	10.3373	0.0986348	6.59475	96.6537	2.00327e-219	8.00118e-218
Fmod	0.27511	36.3637	-7.14025	0.00708877	2.50148e-219	9.96295e-218
Fzd6	7.95376	33.4312	-2.16945	0.222296	3.31627e-219	1.3171e-217
Efnb2	16.6945	69.9485	-2.16447	0.223064	2.51294e-218	9.95252e-217
Timp2	450.506	129.311	1.70272	3.25514	4.51112e-218	1.78164e-216
Ccng1	25.2386	113.011	-2.26071	0.20867	5.70109e-217	2.24534e-215
Nkain4	0.0238209	43.2796	-10.6881	0.000606104	8.23748e-217	3.23527e-215
Cyp2j6	6.4511	0.102079	5.86468	58.2701	9.49888e-216	3.72035e-214
Efna1	32.6848	4.0187	2.92528	7.59619	1.68968e-215	6.59955e-214
Trpv4	9.44468	0.305967	4.84694	28.7788	3.18291e-215	1.23976e-213
Slco1a5	10.468	0.363946	4.74143	26.7493	2.22852e-212	8.65632e-211
Glul	21.34	3.12015	2.67581	6.38996	6.57838e-212	2.54827e-210
Mkx	7.29017	0.133429	5.65856	50.5123	1.57573e-211	6.08723e-210
S1pr3	26.6336	3.40306	2.86961	7.30868	1.99336e-211	7.67959e-210
Lama5	4.96598	31.3203	-2.75441	0.148197	3.72264e-211	1.43028e-209
Lrch2	8.33263	0.362943	4.41718	21.3651	7.12251e-211	2.72914e-209
Lipa	54.4325	11.8951	2.09654	4.27681	9.25076e-211	3.53504e-209
Tubb3	17.0406	1.02264	3.95738	15.5343	2.78143e-210	1.06002e-208
Hmgn5	16.21	108.735	-2.84408	0.139266	3.26122e-210	1.23953e-208
Sh3rf2	0.0263163	4.95955	-7.62328	0.00507182	3.43403e-210	1.30171e-208
Vat1l	0.0139041	4.81807	-8.42465	0.00291023	2.07482e-209	7.84384e-208
Nqo1	53.5867	6.91413	2.85654	7.24276	4.43908e-209	1.67371e-207
Slfn9	7.52759	0.198615	5.13751	35.2001	4.71664e-209	1.77363e-207
Mfap2	26.0805	0.404931	5.89783	59.6244	2.25224e-208	8.4468e-207
Pear1	20.5869	3.46608	2.47182	5.54743	1.67108e-207	6.25064e-206
Wwc1	9.08892	47.9569	-2.4969	0.177157	2.99946e-207	1.11898e-205
Fam213a	73.478	3.5267	4.28207	19.4551	4.76101e-207	1.77147e-205
Abca5	10.0243	0.210013	5.47779	44.5635	6.47582e-207	2.40319e-205
St8sia2	3.33115	0.0129484	7.83343	228.086	6.08662e-206	2.25285e-204
P2ry14	12.9438	0.0458191	7.98331	253.056	6.60248e-206	2.4374e-204
Gpr124	55.784	13.9442	1.90205	3.73744	2.42882e-205	8.94298e-204
Gng2	7.41156	0.082856	6.36259	82.2867	7.04494e-205	2.58723e-203
Ptk2b	1.83881	20.16	-3.55175	0.0852742	1.65896e-204	6.07668e-203
B4galnt1	14.8963	0.446264	4.95715	31.0635	2.63007e-204	9.60891e-203
Prrg1	8.31056	0.277312	4.80246	27.9052	4.1725e-204	1.52049e-202
Mpzl2	0.0790645	9.11078	-6.92213	0.00824577	4.76092e-204	1.73045e-202
Ror2	6.73256	0.245824	4.67245	25.5005	7.62593e-204	2.76469e-202
Vav3	0.245967	5.10138	-4.47099	0.0450918	2.21739e-203	8.01834e-202
Alpk1	5.97377	0.186759	4.89522	29.7583	3.22018e-203	1.16148e-201
Brinp1	5.39619	0.0119467	8.60299	388.829	7.3439e-203	2.64212e-201
Tagln	167.345	651.008	-2.05729	0.240266	2.51708e-201	9.03274e-200
Cds1	5.66524	0.0508815	6.67648	102.287	3.51166e-201	1.257e-199
Kcnab2	7.17052	0.34268	4.28569	19.5039	8.80726e-201	3.14459e-199
Lrrfip1	22.7175	82.0792	-1.95137	0.25857	1.24397e-200	4.43037e-199
Pdlim1	85.9936	11.299	2.83047	7.11307	1.62222e-200	5.76297e-199
Slc11a2	45.2963	12.9028	1.71383	3.2803	2.94725e-200	1.04439e-198
Ezr	46.1479	473.174	-3.45652	0.0910925	5.50982e-200	1.94758e-198
Cobl	1.76967	14.4132	-3.12317	0.114771	1.49911e-199	5.28576e-198
Cpz	0.00950231	7.74552	-9.53479	0.00134816	2.47067e-199	8.68977e-198
Stxbp2	3.13665	21.2158	-2.85407	0.138305	6.39975e-199	2.24531e-197
Ppfibp1	37.2785	112.016	-1.6852	0.31096	1.40927e-198	4.93208e-197
Ramp2	19.0445	0.0681574	7.93586	244.868	1.49776e-198	5.22886e-197
Slc39a10	13.2898	45.8648	-1.88519	0.270708	3.97509e-198	1.38433e-196
Gab2	0.413383	5.1417	-3.73086	0.075318	8.42772e-198	2.92775e-196
Eda2r	1.66937	32.1348	-4.3639	0.0485663	3.23523e-197	1.12115e-195
Gpr176	11.7974	1.45853	2.91709	7.55321	4.37697e-197	1.51311e-195
Aldh1a1	0.100508	64.5447	-9.40041	0.00147978	5.59869e-196	1.93073e-194
Galm	11.5545	0.598877	4.16831	17.9799	5.93331e-196	2.04115e-194
Sorcs2	11.5638	1.77722	2.60383	6.079	1.10488e-195	3.79172e-194
Igdcc4	0.608274	7.11942	-3.64737	0.0798053	1.16612e-195	3.99218e-194
Slc6a17	3.49993	0.1056	4.94307	30.7618	1.29219e-195	4.4131e-194
Sgcd	15.0698	0.263448	5.7267	52.9552	3.01186e-195	1.02614e-193
Ammecr1	5.92323	28.3006	-2.3549	0.195481	5.19988e-195	1.76734e-193
Cxcl12	92.5759	365.166	-2.07738	0.236944	2.08261e-194	7.06139e-193
Slit3	8.66286	104.648	-3.69278	0.0773323	8.37648e-194	2.83337e-192
Mid1	15.1384	1.90171	2.89468	7.43681	9.87542e-194	3.33243e-192
Pvrl2	25.0932	86.3771	-1.88061	0.271568	3.00423e-193	1.01135e-191
Pag1	1.04072	7.84252	-3.01195	0.123969	4.48921e-192	1.50767e-190
Aqp1	82.5868	2.16401	5.15395	35.6035	2.77962e-191	9.31304e-190
Cd248	69.1442	18.8373	1.77827	3.43016	1.37048e-190	4.58089e-189
Runx3	5.55956	0.135512	5.25002	38.0552	2.07491e-190	6.91915e-189
Eml2	0.364714	9.60764	-4.80662	0.0357324	8.30197e-190	2.76192e-188
Tgfa	0.0623979	4.05743	-6.09412	0.0146382	1.00109e-189	3.32264e-188
Fscn1	186.355	666.727	-1.93709	0.261143	1.45496e-189	4.81771e-188
Ctla2a	1.5872	23.6	-3.98862	0.0629948	7.06014e-189	2.33232e-187
Gstm2	3.83413	47.4755	-3.72418	0.0756678	1.24156e-188	4.09192e-187
Repin1	8.65994	0.398719	4.33743	20.216	1.49515e-188	4.91625e-187
Gjb4	24.5418	2.17586	3.39536	10.5222	2.54617e-188	8.35273e-187
Itm2a	11.9076	0.121905	6.48535	89.595	2.68704e-188	8.79446e-187
Psrc1	9.98999	51.1727	-2.45448	0.182444	4.0305e-188	1.3161e-186
Lgals9	20.0861	94.7123	-2.33517	0.198173	6.23515e-188	2.03131e-186
Sulf2	3.9339	27.8543	-2.92178	0.131965	3.95234e-187	1.28465e-185
Dpy19l1	103.193	19.9449	2.27349	4.8349	4.59729e-187	1.49085e-185
Slc25a23	0.389652	11.912	-5.02417	0.0307309	2.26097e-186	7.3153e-185
Vdac2	136.212	377.497	-1.5685	0.337158	1.45381e-185	4.69301e-184
Enc1	12.8925	46.223	-1.9398	0.260653	2.04938e-185	6.60049e-184
Bicd1	0.406046	3.44058	-3.17961	0.110368	1.24979e-184	4.01609e-183
Cap2	0.22826	5.25445	-4.61499	0.0408084	1.4949e-183	4.79282e-182
Elovl6	34.4218	9.78781	1.7163	3.28593	4.98482e-183	1.59458e-181
Cyp26b1	6.2926	0.376707	3.95955	15.5576	1.45572e-182	4.64616e-181
Btbd2	16.555	2.48437	2.6375	6.22251	1.64949e-182	5.25274e-181
Ptpn22	13.4548	0.197446	5.97847	63.0522	3.84662e-182	1.22219e-180
Rcan1	70.5863	12.353	2.4164	5.33838	1.45293e-181	4.60604e-180
Kif21b	0.604046	4.98988	-3.14428	0.113103	1.47218e-181	4.65665e-180
Fbxo2	39.8682	4.22366	3.13889	8.80844	1.99127e-181	6.28451e-180
Fam84b	0.808066	7.39499	-3.29112	0.102158	4.76305e-181	1.49988e-179
Nsdhl	43.019	10.1911	1.97991	3.94468	1.18882e-180	3.73526e-179
Syt14	0.0143112	2.34216	-7.41121	0.00587496	2.52915e-180	7.92897e-179
Pip4k2a	4.94291	20.2023	-2.12924	0.228578	2.67786e-180	8.37662e-179
Slc1a3	39.2282	8.91213	2.04017	4.11295	3.3391e-180	1.0422e-178
9330188P03Rik	14.8899	0.101704	7.0552	132.992	7.14123e-180	2.22401e-178
Fat4	5.53947	0.556256	3.21779	9.30362	1.28523e-179	3.99382e-178
Lrrc8e	4.85016	0.128401	5.13116	35.0456	9.87159e-179	3.06084e-177
Agrn	22.359	6.45314	1.69487	3.23747	1.38331e-178	4.2798e-177
Hmgcs1	164.071	42.0619	1.86591	3.64498	1.23889e-177	3.82461e-176
Smpd3	2.24278	16.7326	-2.99633	0.125318	2.12595e-177	6.54876e-176
Bhlhe22	4.26661	0.0062891	9.07602	539.703	6.17198e-177	1.89708e-175
Lgals3	269.307	73.663	1.77233	3.41606	3.75053e-176	1.1503e-174
Steap1	43.152	137.839	-1.77303	0.292594	5.3182e-176	1.62758e-174
Ddx52	65.8952	18.8411	1.70842	3.26804	6.97124e-176	2.12886e-174
5830416P10Rik	0.0251367	2.93783	-6.93061	0.00819743	8.59757e-176	2.61985e-174
Rps6ka1	5.34152	21.062	-2.07708	0.236994	1.40924e-175	4.28499e-174
Pon3	0.216474	9.79791	-5.58022	0.020902	2.10081e-175	6.37411e-174
Tcaf2	5.77333	0.172877	4.95462	31.0092	3.06523e-175	9.28035e-174
Smim1	4.97497	30.9724	-2.73643	0.150056	4.26392e-175	1.28819e-173
Oaf	40.2431	5.01532	2.90547	7.4926	7.48606e-175	2.25683e-173
Adamts9	2.35646	20.079	-3.18849	0.10969	9.35873e-175	2.81538e-173
Ctsl	832.516	227.904	1.77156	3.41423	1.10576e-174	3.31939e-173
Tbc1d10a	61.3218	13.4869	2.08703	4.24874	1.75618e-174	5.26073e-173
Ifitm2	554.969	124.406	2.0599	4.16957	1.79328e-174	5.36051e-173
U90926	133.846	7.39731	4.07996	16.9118	4.45758e-174	1.32966e-172
Jup	11.7457	35.018	-1.6737	0.313448	4.80966e-174	1.43166e-172
S100a4	2901.25	882.423	1.61921	3.07206	9.37135e-174	2.78364e-172
Capn2	72.8347	191.718	-1.49393	0.355045	2.73017e-173	8.09263e-172
Gsta4	7.71234	92.5978	-3.68331	0.0778416	3.70645e-173	1.09635e-171
Hoxc13	0.0374072	6.75512	-7.52375	0.00543407	5.5808e-173	1.64733e-171
Xkr5	6.74888	0.276047	4.50957	22.778	7.42134e-173	2.18605e-171
Fstl1	689.602	234.106	1.46067	2.75237	3.6461e-172	1.07177e-170
Snai2	26.7265	3.91058	2.67451	6.3842	7.11954e-172	2.08845e-170
Fas	97.713	13.0994	2.80083	6.96841	1.2867e-171	3.76658e-170
Slc12a2	58.4364	11.5524	2.24091	4.72695	2.6781e-171	7.82348e-170
Specc1	11.1418	36.1424	-1.79593	0.287987	3.26687e-171	9.52377e-170
Lrrk2	7.30349	1.1624	2.55342	5.87023	5.59995e-171	1.62917e-169
Ifi30	23.1495	92.0888	-2.08993	0.234893	2.03114e-170	5.89698e-169
Sh3pxd2a	60.8804	18.6643	1.60767	3.0476	3.18118e-170	9.21695e-169
Rftn1	7.41113	0.199062	5.11095	34.558	4.23626e-170	1.22488e-168
Kazn	0.242328	6.68316	-4.87898	0.0339845	8.6745e-170	2.50304e-168
Edil3	3.08831	0.00376543	9.34984	652.505	1.48909e-169	4.28804e-168
Gpc6	3.72357	0.174852	4.31097	19.8487	2.10289e-169	6.04323e-168
Ccl2	866.727	154.718	2.38742	5.23221	2.25362e-169	6.46328e-168
Ugt1a7c	0.218935	11.1392	-5.75578	0.0185071	3.23803e-169	9.26772e-168
Radil	4.71486	0.0370314	6.85896	116.079	4.79059e-169	1.36837e-167
Trabd2b	0.124309	3.20937	-4.77686	0.0364772	4.90251e-169	1.39751e-167
Pfkfb3	4.10861	17.6634	-2.20122	0.217454	6.92259e-169	1.96939e-167
Loxl2	20.8962	62.3555	-1.67507	0.313151	6.12325e-168	1.73849e-166
Cda	22.155	0.677195	4.92497	30.3783	1.02431e-167	2.90234e-166
Carns1	5.57978	0.185831	4.8042	27.9388	1.21146e-167	3.42577e-166
Slc24a3	0.654273	16.8373	-4.78021	0.0363927	1.25642e-167	3.54581e-166
Pitpnc1	3.29069	0.18341	4.06258	16.7093	3.19292e-167	8.99298e-166
Pawr	16.371	58.8433	-1.94339	0.260006	7.80154e-167	2.19296e-165
Sft2d2	3.0971	14.015	-2.27543	0.206551	9.156e-167	2.56858e-165
G6pc3	23.6516	0.711181	4.95564	31.031	1.12599e-166	3.15256e-165
Car13	27.54	1.6269	3.98068	15.7872	1.92856e-166	5.38892e-165
Tnfaip2	20.7781	4.9708	1.96524	3.90479	4.1245e-166	1.15022e-164
6430584L05Rik	0	3.72409	-11.6504	0.000311084	5.75587e-166	1.60201e-164
Mycn	1.8519	37.2497	-4.42984	0.0463966	8.68963e-166	2.41381e-164
Rbp1	32.7327	5.73013	2.4164	5.33836	1.17495e-165	3.25739e-164
Gbp2	9.65514	0.360291	4.63864	24.9098	3.37502e-165	9.33844e-164
Sema6d	0.0322982	2.63625	-6.40555	0.0117961	9.06952e-165	2.50457e-163
Stk39	9.60558	32.6977	-1.86543	0.274441	1.81339e-164	4.99796e-163
Col7a1	13.3135	2.34461	2.40718	5.30437	2.19297e-164	6.03239e-163
Tuft1	1.61226	12.8348	-3.0897	0.117465	3.03236e-164	8.32515e-163
Slc14a1	3.60087	0.00272946	9.82442	906.663	5.57674e-164	1.52809e-162
Fam101b	3.9008	15.4948	-2.08734	0.235314	7.55578e-164	2.06637e-162
Mtss1	7.64719	28.417	-1.99166	0.251449	1.25268e-163	3.41923e-162
Ankrd33b	10.7637	0.257076	5.28009	38.8568	1.43374e-163	3.9059e-162
Mdfic	15.196	48.752	-1.7797	0.291243	2.31818e-163	6.30322e-162
Ifitm3	469.215	120.93	1.8586	3.62655	4.94221e-163	1.34123e-161
Decr1	0.598895	8.0758	-3.84721	0.0694822	5.40967e-163	1.46527e-161
Tsc22d3	16.1776	1.49282	3.33743	10.1081	3.75898e-162	1.01622e-160
Nav1	3.57465	12.5985	-1.91491	0.265189	1.04674e-160	2.82441e-159
Tnfrsf11b	12.003	0.632357	4.14567	17.6999	2.98864e-160	8.04885e-159
Tcn2	1.4886	13.0125	-3.22258	0.107129	3.49139e-160	9.38493e-159
Zeb2	3.90072	13.0709	-1.84259	0.278821	9.04892e-160	2.42776e-158
Pdcd4	26.2203	4.94766	2.30765	4.95076	1.22846e-159	3.28962e-158
Wsb2	49.5404	148.779	-1.68415	0.311186	1.3196e-159	3.52701e-158
Renbp	10.7586	43.835	-2.12496	0.229257	1.74687e-159	4.66017e-158
I830012O16Rik	8.90636	0.163586	5.65572	50.4129	2.93494e-159	7.8149e-158
Mark1	4.9309	0.124127	5.20266	36.8261	6.2179e-159	1.65254e-157
Tjp2	6.15629	22.4712	-1.9663	0.255909	7.21729e-159	1.91455e-157
Tbkbp1	0.184896	6.51163	-5.21685	0.0268888	2.86421e-158	7.58371e-157
Lynx1	5.29071	0.156252	4.9753	31.4568	3.65939e-158	9.67104e-157
Hoxa3	16.1432	2.56982	2.55315	5.86915	5.50001e-158	1.45083e-156
Tenm3	3.40567	11.1978	-1.81464	0.284276	6.03278e-158	1.58841e-156
Impact	50.4618	12.5493	1.90948	3.75673	1.98313e-157	5.21179e-156
Gnptab	14.9875	39.7888	-1.5063	0.352013	2.52827e-157	6.63213e-156
Gypc	60.0774	12.5091	2.16559	4.48649	5.2158e-157	1.36567e-155
Neto2	7.01183	0.862131	2.92469	7.59312	1.16722e-156	3.05052e-155
Gpr153	12.2048	2.0662	2.46387	5.51693	1.98368e-156	5.17477e-155
Rhpn2	2.51816	14.5088	-2.62364	0.162258	4.68694e-156	1.22042e-154
Rab6b	6.82756	24.8889	-1.96334	0.256435	7.3835e-156	1.91903e-154
Itih2	7.49765	0.302429	4.52625	23.0429	1.2461e-155	3.23277e-154
2610524H06Rik	17.6209	0.379793	5.42574	42.9844	3.49066e-155	9.03927e-154
Lpcat4	18.688	65.2497	-1.90183	0.267603	4.11829e-155	1.06451e-153
Murc	9.04919	0.267923	4.97072	31.3572	4.51588e-155	1.16515e-153
Pkia	4.13999	26.6233	-2.78265	0.145324	6.56359e-155	1.69039e-153
Tlr7	0.0370109	3.76973	-6.73237	0.00940492	6.77563e-155	1.74183e-153
Itfg3	21.5864	59.2046	-1.55304	0.340791	1.05695e-154	2.7122e-153
Msln	20.9885	176.805	-3.17233	0.110926	1.44296e-154	3.69601e-153
Fmnl2	15.3397	3.42076	2.06637	4.18832	5.00653e-154	1.28006e-152
Nmt2	9.99088	41.0829	-2.138	0.227195	8.91741e-154	2.27587e-152
Med12l	1.15842	0.00292927	8.37041	330.937	1.86103e-153	4.7411e-152
Pik3r5	8.53836	0.576195	3.79069	13.8393	3.80505e-153	9.67618e-152
Mapk3	101.506	32.0166	1.56652	2.96189	1.04024e-152	2.64056e-151
Dock8	0.0990849	4.29929	-5.52837	0.0216668	1.52885e-152	3.87391e-151
Lrp4	7.70107	0.426368	4.074	16.8422	2.73924e-152	6.92847e-151
Tpm1	710.909	2032.39	-1.61306	0.326905	3.31026e-152	8.35782e-151
Rab3il1	12.4182	0.565435	4.3537	20.4454	1.56587e-151	3.94649e-150
Fmo1	7.20139	0.0086252	9.37669	664.758	2.06239e-151	5.18863e-150
Fras1	0.200182	5.99619	-4.99927	0.0312657	2.23866e-151	5.6221e-150
Pogk	2.91585	0.154344	4.13729	17.5974	5.43327e-151	1.36207e-149
Cacna1b	1.43869	0.0122765	6.73728	106.69	1.89128e-150	4.73289e-149
Adam19	6.86378	0.64286	3.31859	9.97692	2.17085e-150	5.42292e-149
Sirt6	0.0974359	8.12204	-6.44092	0.0115104	2.75892e-150	6.87979e-149
Pfn2	67.995	15.078	2.07469	4.21255	3.44768e-150	8.58217e-149
Arhgap18	1.86472	17.8693	-3.35844	0.0975012	3.91263e-150	9.72244e-149
Rnf157	3.35547	0.0770842	5.33318	40.3131	5.16348e-150	1.28081e-148
Vopp1	17.9312	1.2485	3.74414	13.3998	6.83047e-150	1.69135e-148
Faxc	6.85535	1.69067	1.92177	3.78887	8.54399e-150	2.11195e-148
Dusp1	28.0174	4.56089	2.52032	5.73707	1.09368e-149	2.6987e-148
Irs2	6.90581	29.1809	-2.17707	0.221125	1.52842e-149	3.76488e-148
Lhx2	0.155208	6.11482	-5.38301	0.0239637	1.82277e-149	4.4821e-148
Ezh1	16.4983	2.79749	2.46102	5.50605	2.64901e-149	6.50249e-148
Sesn1	23.5922	4.7482	2.21516	4.64333	2.78466e-149	6.82363e-148
Klhl22	26.7942	75.7966	-1.59753	0.330442	3.06604e-149	7.50013e-148
Ddah1	17.9387	47.8658	-1.5135	0.35026	4.04695e-149	9.88252e-148
Sema4a	0.330201	6.38337	-4.3648	0.0485359	6.17932e-149	1.50637e-147
Gm6756	9.57031	0.0470159	7.5129	182.645	8.31217e-149	2.02282e-147
Kat2b	4.92574	23.2431	-2.33643	0.197999	8.67039e-149	2.10637e-147
Wasf3	8.95604	0.34771	4.58054	23.9265	1.98165e-148	4.80593e-147
Cd151	34.6637	98.3206	-1.60156	0.32952	3.09482e-148	7.49276e-147
Aff2	0.00919608	2.82853	-8.24793	0.00328946	3.53754e-148	8.54995e-147
Trp53bp2	4.94417	21.7382	-2.23489	0.212437	3.97327e-148	9.58669e-147
Odc1	94.1106	224.736	-1.35374	0.391276	5.33195e-148	1.2843e-146
Coro1c	39.5542	103.546	-1.48655	0.356864	5.5409e-148	1.33236e-146
Hspb2	35.2347	2.7276	3.59189	12.0578	5.63557e-148	1.35282e-146
Fbln2	154.581	551.821	-1.93327	0.261835	7.2614e-148	1.74015e-146
Pvr	6.43368	26.377	-2.13314	0.227962	1.86901e-147	4.4714e-146
Ppap2c	10.1822	37.8342	-1.99091	0.25158	2.25998e-147	5.39761e-146
Jade1	7.23594	20.6881	-1.61357	0.32679	4.56777e-147	1.0891e-145
Nsd1	7.65614	2.23341	1.67967	3.20354	7.15613e-147	1.70338e-145
Lrp1	113.99	34.6879	1.61866	3.07089	9.99686e-147	2.37556e-145
Pde3a	3.15133	0.0546286	5.73383	53.2175	1.30379e-146	3.09301e-145
Pcbp3	7.91952	0.385035	4.25993	19.1587	2.93595e-146	6.95333e-145
Glrb	4.46772	0.0235245	7.40556	169.549	3.04533e-146	7.20031e-145
Aqp3	7.08673	0.0958091	6.07757	67.5351	7.40822e-146	1.74866e-144
Exoc6	1.67797	12.8276	-3.03315	0.122161	8.66587e-146	2.04211e-144
Prkca	17.7736	5.066	1.71288	3.27815	1.56378e-145	3.67891e-144
Rbpms	8.33929	38.1369	-2.29038	0.204422	2.25538e-145	5.29705e-144
Man1a	3.58407	14.0698	-2.07087	0.238015	2.25909e-145	5.29705e-144
Rapgef3	2.50428	11.7275	-2.32489	0.19959	2.74477e-145	6.42521e-144
4930523C07Rik	9.62878	0.184816	5.5924	48.2482	3.5609e-145	8.3219e-144
Wrb	7.03808	26.4293	-2.00726	0.248745	3.67247e-145	8.56849e-144
Ccng2	21.6252	4.3145	2.22724	4.68238	3.9764e-145	9.26234e-144
Spry4	0.66507	6.19555	-3.3178	0.100286	5.77611e-145	1.34323e-143
Nhsl1	2.18235	10.2862	-2.3337	0.198375	7.56597e-145	1.75657e-143
Hpse	6.36893	0.377767	3.97288	15.7021	9.02522e-145	2.09193e-143
Rnd1	11.8967	54.3999	-2.29138	0.20428	1.7066e-144	3.9492e-143
St8sia1	0.00442732	1.44195	-8.28054	0.00321596	5.78539e-144	1.33659e-142
Bahcc1	13.1681	3.81032	1.69063	3.22798	8.48631e-144	1.95739e-142
Peg3	5.33282	22.4848	-2.17383	0.221622	8.98712e-144	2.06953e-142
Neat1	314.652	75.7786	1.956	3.87986	1.08507e-143	2.4946e-142
Sez6l	0.00700615	2.00763	-8.14445	0.00353407	2.06768e-143	4.74594e-142
Mpp2	2.75515	12.004	-2.22005	0.214634	2.29123e-143	5.25052e-142
Syt11	12.9398	2.8071	2.10682	4.30741	3.07327e-143	7.03122e-142
Rhbdl3	0.0947917	4.11564	-5.52413	0.0217305	6.0705e-143	1.3866e-141
Frrs1	8.87515	31.8336	-1.94047	0.260531	4.42627e-142	1.0094e-140
Tatdn2	12.681	37.2711	-1.65317	0.317941	8.08713e-142	1.84129e-140
Ppp2r5a	6.48823	23.8225	-1.97421	0.254509	9.67242e-142	2.19869e-140
Pitpnm3	2.5118	0.0880065	4.72624	26.4692	1.24166e-141	2.81794e-140
Pam	29.2682	8.45863	1.69279	3.23282	1.29354e-141	2.93099e-140
Sh3bp4	14.2149	38.0074	-1.51629	0.349585	3.96977e-141	8.98057e-140
Cd200	20.6968	4.2802	2.17504	4.51597	4.98145e-141	1.12512e-139
Fn1	454.827	1047.88	-1.30197	0.405572	5.81471e-141	1.31123e-139
Bmp6	0.419775	9.65686	-4.6197	0.0406754	6.5942e-141	1.48464e-139
Fam64a	76.2236	24.195	1.55762	2.94368	7.46984e-141	1.67911e-139
Magi3	8.85341	28.2467	-1.77156	0.292891	9.76383e-141	2.19128e-139
Laptm4b	34.3462	92.9099	-1.53383	0.34536	1.08343e-140	2.42767e-139
Baz1a	6.73697	19.7375	-1.64876	0.318913	2.27978e-140	5.10028e-139
Igfbp7	233.998	73.5901	1.5714	2.97193	2.75668e-140	6.15746e-139
Far1	61.5642	20.2764	1.50437	2.83701	4.07413e-140	9.08582e-139
Slc18b1	7.05496	0.147124	5.47066	44.3437	1.1186e-139	2.4907e-138
Timm8a1	32.3081	90.1001	-1.57769	0.335018	1.50889e-139	3.35443e-138
Sepp1	9.33523	56.1106	-2.68419	0.155589	2.43998e-139	5.41584e-138
Rnf145	50.6457	17.6687	1.42125	2.67817	4.6548e-139	1.03157e-137
Ajuba	21.8852	58.1156	-1.50697	0.351849	1.49687e-138	3.31209e-137
Fam46a	3.93156	0.0492401	6.19928	73.48	1.30005e-137	2.87209e-136
Cdo1	18.3815	0.364241	5.55072	46.8743	4.93774e-137	1.08915e-135
Slco2a1	12.8384	1.38592	3.11275	8.65031	6.20227e-137	1.36595e-135
Ogn	146.877	7.46654	4.19939	18.3714	9.23382e-137	2.03044e-135
Plod2	41.8048	103.693	-1.40829	0.376759	7.85789e-136	1.7252e-134
Plcb1	2.40617	0.149425	3.90667	14.9977	9.22345e-136	2.02187e-134
Gnao1	6.35795	0.460887	3.68623	12.8726	2.07491e-135	4.54136e-134
Zfp518a	7.69907	1.56763	2.19807	4.58866	2.5258e-135	5.51967e-134
Igsf9	0.235738	4.67825	-4.40517	0.0471966	2.6822e-135	5.85241e-134
Elovl4	5.57053	0.211773	4.61081	24.4338	4.15848e-135	9.05959e-134
Trp63	6.93402	0.0976726	6.01749	64.7807	5.70734e-135	1.24148e-133
Mecom	8.44315	0.693408	3.50717	11.3701	6.8096e-135	1.47897e-133
Rnf150	24.4611	8.10054	1.49625	2.82109	7.63233e-135	1.65512e-133
Rgma	10.718	1.18397	3.08034	8.45812	2.78357e-134	6.02709e-133
Atf6	6.4942	17.7924	-1.55223	0.340982	2.95783e-134	6.39461e-133
Dap	269.423	90.6501	1.47371	2.77735	4.03191e-134	8.70339e-133
Pkd2	63.5227	22.4493	1.40255	2.64368	5.27599e-134	1.13715e-132
Bnip3	49.1588	9.16444	2.32531	5.01173	6.82691e-134	1.46919e-132
Zfp809	6.91755	27.2777	-2.0776	0.236909	1.38208e-133	2.96979e-132
Fam184a	0.00521648	2.41401	-8.71529	0.00237924	1.81284e-133	3.88948e-132
Ly6f	0.046249	22.2414	-8.86906	0.00213869	2.55857e-133	5.48116e-132
Grb14	1.38234	17.6553	-3.76906	0.0733501	1.17024e-132	2.50317e-131
Kcnh2	0.169307	4.49162	-4.81857	0.0354377	1.30435e-132	2.78583e-131
Rbpj	78.7162	25.496	1.52866	2.88518	1.39015e-132	2.96461e-131
B4galnt4	4.71159	0.108687	5.32103	39.975	2.51586e-132	5.35719e-131
Ifi27l2b	0.0188916	12.0633	-9.18212	0.0017215	3.7906e-132	8.05945e-131
Arl4c	6.01205	26.421	-2.23473	0.212462	4.63617e-132	9.84247e-131
Nid1	45.31	145.354	-1.77962	0.291259	8.735e-132	1.85164e-130
Col12a1	137.064	18.1317	2.82012	7.0622	1.70182e-131	3.6021e-130
Gjc1	21.7144	4.58717	2.14437	4.42099	1.85635e-131	3.9233e-130
Degs1	62.1958	178.089	-1.61557	0.326337	3.65322e-131	7.70938e-130
Gm20744	0.00758259	3.51391	-8.66823	0.00245811	4.01647e-131	8.46331e-130
Rnf39	0.0285295	6.45477	-7.8049	0.00447187	4.3453e-131	9.1426e-130
Plcd1	24.0116	5.65277	1.98868	3.96873	5.24516e-131	1.10195e-129
Cstf2t	32.3217	10.1081	1.57932	2.98829	5.69084e-131	1.19381e-129
Ssh3	0.883677	8.25585	-3.32149	0.10003	5.81809e-131	1.2187e-129
Enpp4	4.89324	16.8555	-1.88254	0.271205	1.68529e-130	3.52491e-129
Tbl1xr1	16.1166	4.97132	1.59861	3.02852	2.32661e-130	4.85908e-129
Fam107b	12.8318	42.8977	-1.83964	0.279391	2.3664e-130	4.93489e-129
Mtus2	0.0550949	2.35351	-5.49498	0.0221741	2.95132e-130	6.14562e-129
Tes	15.0411	65.4239	-2.21866	0.214841	3.44101e-130	7.15477e-129
Tmed5	22.4103	55.6024	-1.4091	0.376547	3.51395e-130	7.2957e-129
Plin4	2.71325	0.0498739	5.64221	49.9431	3.86922e-130	8.02154e-129
Baiap2l1	6.54776	23.2201	-1.92338	0.263636	4.2962e-130	8.8937e-129
Il3ra	11.0473	0.142778	6.15025	71.0247	4.41913e-130	9.13481e-129
Wipf1	12.3489	1.75616	2.71452	6.56374	5.88385e-130	1.21448e-128
Omd	8.37616	0.165778	5.54977	46.8434	6.53498e-130	1.34691e-128
Nr1h4	0.0103804	6.01464	-9.03968	0.00190014	7.09365e-130	1.45993e-128
Ssc5d	10.0563	1.91144	2.29677	4.91357	1.59682e-129	3.2816e-128
Glipr2	43.2122	12.9931	1.63552	3.107	2.14802e-129	4.40796e-128
Lbp	13.1721	1.06097	3.53525	11.5935	4.17662e-129	8.55845e-128
Pknox2	0.519256	6.79788	-3.80267	0.0716607	4.60977e-129	9.43235e-128
Tomm70a	29.0903	71.4123	-1.39354	0.380629	5.77876e-129	1.18072e-127
Scara5	5.31052	0.175761	4.81437	28.1365	5.92306e-129	1.20846e-127
Fbln1	25.6885	2.85061	3.07413	8.42179	1.58048e-128	3.21993e-127
Foxo6	0.0245038	4.35388	-7.50026	0.00552329	1.72392e-128	3.50713e-127
Sdc3	16.2238	1.78865	3.08383	8.47861	1.85618e-128	3.77077e-127
Lpar4	6.74215	1.0387	2.59948	6.06069	1.94383e-128	3.94315e-127
Als2cl	4.47702	0.397642	3.39321	10.5065	2.87663e-128	5.82703e-127
Tmem98	46.5084	164.168	-1.91744	0.264724	5.94957e-128	1.20345e-126
Ankrd1	37.8549	7.9541	2.15228	4.44529	8.38113e-128	1.69287e-126
Arl6ip1	29.1323	72.5917	-1.41509	0.374987	1.04178e-127	2.10124e-126
Tfeb	6.21686	22.5179	-1.95498	0.257924	1.09428e-127	2.204e-126
Sphk1	7.62432	0.270468	4.711	26.1909	1.11266e-127	2.23783e-126
Vwa5a	22.9585	6.73036	1.67249	3.18765	1.17164e-127	2.35309e-126
Pros1	32.6046	7.81937	1.9622	3.89656	1.18779e-127	2.38215e-126
Cyp4v3	7.08376	0.172627	5.2463	37.9572	1.40579e-127	2.81537e-126
Phf19	5.95442	0.662307	3.06823	8.38745	1.56169e-127	3.12316e-126
Dusp5	6.41594	37.8551	-2.65891	0.158339	2.61395e-127	5.22015e-126
Akap6	0.256703	2.94883	-3.61628	0.0815438	4.64426e-127	9.26166e-126
Rspo1	0.547797	18.168	-5.13988	0.0283623	9.297e-127	1.85141e-125
Mest	8.46686	0.309769	4.66583	25.3837	2.53309e-126	5.03733e-125
Errfi1	28.8404	7.0708	1.93011	3.81083	2.72103e-126	5.40346e-125
Emc2	145.648	53.1749	1.35595	2.55965	1.97578e-125	3.91804e-124
Tspan15	8.76822	0.880506	3.21582	9.29093	3.44323e-125	6.81847e-124
Sik1	4.47433	17.205	-2.04063	0.243057	5.46019e-125	1.07974e-123
Igfbp6	18.0953	79.2164	-2.22736	0.213549	1.01868e-124	2.01161e-123
Nbl1	54.5911	13.0771	1.96403	3.90151	1.85594e-124	3.65985e-123
Camk1d	5.68239	0.672886	2.98	7.88987	2.27207e-124	4.47421e-123
H6pd	30.9318	8.18161	1.82108	3.53345	2.46961e-124	4.85644e-123
Znf41-ps	0.242703	3.68984	-4.01622	0.0618012	4.43816e-124	8.71544e-123
Rims2	1.88117	7.79145	-2.14776	0.225662	5.12595e-124	1.00521e-122
Slc4a4	2.41133	13.8455	-2.6197	0.162702	6.3193e-124	1.23752e-122
Snx8	9.24438	29.9507	-1.79386	0.288399	9.93039e-124	1.94199e-122
Hk1	35.4489	11.8283	1.48541	2.79996	3.23921e-123	6.32585e-122
Fam132a	0.583578	12.4252	-4.49724	0.0442787	1.65231e-122	3.22235e-121
Tmod2	2.09279	0.0530883	5.19471	36.6239	2.16198e-122	4.21051e-121
Mb21d1	4.70692	0.125008	5.1239	34.8697	2.85581e-122	5.5541e-121
Itgb5	97.2643	34.7503	1.38724	2.61578	2.97393e-122	5.77588e-121
Prkag2	4.15561	19.3715	-2.31797	0.20055	1.27556e-121	2.47397e-120
Notch1	2.23129	0.138454	3.90846	15.0163	2.00081e-121	3.87526e-120
Tmem154	3.29274	0.0178964	7.34114	162.145	3.41298e-121	6.60138e-120
Gpc2	5.14938	0.07936	5.89756	59.6132	3.72565e-121	7.19632e-120
Stag3	2.34973	0.011716	7.44063	173.722	7.07477e-121	1.36467e-119
Bai2	1.21152	6.84998	-2.59725	0.165253	1.23324e-120	2.37559e-119
Ccl7	438.077	69.6134	2.55557	5.879	1.27755e-120	2.45759e-119
Pdgfrb	35.7589	13.5464	1.30269	2.46688	1.48336e-120	2.84963e-119
Parp8	18.6577	5.24986	1.73132	3.32031	1.52602e-120	2.92759e-119
Snap91	2.75785	0.0117071	7.63957	199.407	4.7809e-120	9.15951e-119
Rftn2	3.55516	0.073354	5.48654	44.8345	4.99961e-120	9.56556e-119
Colec12	39.9592	91.9853	-1.30075	0.405914	6.12039e-120	1.16941e-118
Nbr1	42.7306	16.0929	1.31109	2.48129	6.67393e-120	1.27345e-118
Mcf2l	2.46912	0.117608	4.28699	19.5214	1.58166e-119	3.0139e-118
Foxred2	7.56111	1.24177	2.50775	5.68731	2.10659e-119	4.00875e-118
Gjb3	12.1411	1.19816	3.24017	9.44906	3.33929e-119	6.34599e-118
Slc35g1	0.837925	7.27043	-3.21454	0.107728	4.31847e-119	8.19581e-118
Tenc1	44.4858	16.721	1.31398	2.48627	6.00413e-119	1.13797e-117
Nos1ap	0.0446492	3.36386	-6.29421	0.0127425	6.7708e-119	1.28156e-117
Fads1	135.648	53.5083	1.24429	2.36901	7.47099e-119	1.4122e-117
C1qtnf6	31.5498	8.09444	1.8644	3.64116	8.65068e-119	1.633e-117
Slc1a5	10.4166	28.1228	-1.53021	0.346228	3.79752e-118	7.15909e-117
Col1a1	506.856	1739.19	-1.87673	0.272301	4.21919e-118	7.94342e-117
Sh3tc1	0.192796	4.55713	-4.65568	0.0396734	5.53113e-118	1.03996e-116
Mras	10.3561	44.0919	-2.18814	0.219435	7.73519e-118	1.45243e-116
Antxr1	24.255	8.77005	1.36981	2.58436	7.98786e-118	1.49788e-116
Gas2	11.8803	0.538855	4.35718	20.4948	1.09554e-117	2.05164e-116
Pkn3	11.0644	1.48674	2.79583	6.94429	1.17363e-117	2.19497e-116
Cdh2	28.6921	67.1157	-1.32384	0.39947	1.52126e-117	2.84135e-116
Fndc3a	44.1762	16.2445	1.34529	2.54082	3.58936e-117	6.69525e-116
Ankrd44	2.65938	8.72383	-1.8111	0.284973	4.08331e-117	7.60657e-116
Rap2a	6.90062	25.4685	-1.98277	0.253003	6.16047e-117	1.14609e-115
Cpxm1	17.0059	1.33916	3.56632	11.8459	6.3729e-117	1.18405e-115
Efnb1	11.5669	40.6541	-1.91044	0.266012	1.0453e-116	1.93956e-115
Inpp4b	1.59239	0.0143801	6.65915	101.065	1.05842e-116	1.96134e-115
Rassf3	5.46854	0.372603	3.77501	13.6896	1.79273e-116	3.31773e-115
Micall2	33.7964	10.2283	1.62616	3.08689	3.18294e-116	5.88282e-115
Tulp4	28.3955	63.9827	-1.27009	0.414634	5.98062e-116	1.10392e-114
Gulp1	5.91605	22.9027	-2.04955	0.24156	6.22291e-116	1.14714e-114
Ebf1	2.95091	0.14154	4.27807	19.4011	7.48718e-116	1.3784e-114
Tmem63a	18.4747	42.2681	-1.29193	0.408405	1.35938e-115	2.49938e-114
Adcy1	0.00168095	1.11636	-9.23658	0.00165772	1.43184e-115	2.62919e-114
Plekha2	24.5578	9.03843	1.34417	2.53883	1.58074e-115	2.89884e-114
Bicc1	11.6083	31.7357	-1.54901	0.341746	2.12569e-115	3.89315e-114
Tpst2	22.978	62.005	-1.53033	0.346198	2.78069e-115	5.08618e-114
Ltbp2	77.7989	11.4444	2.66794	6.35521	3.78575e-115	6.91561e-114
Alx4	0.0158576	2.29329	-7.22343	0.00669161	4.11802e-115	7.51286e-114
Sv2a	1.2727	9.33282	-2.96983	0.127641	5.68556e-115	1.03593e-113
Kcnq5	1.76248	0.0706084	4.53568	23.194	6.32017e-115	1.15008e-113
Mst1r	0.0340807	5.63916	-7.38112	0.00599877	1.19557e-114	2.17276e-113
Nol3	3.75468	0.0591084	5.86295	58.2001	1.31667e-114	2.38978e-113
Vav2	5.54229	18.1081	-1.80612	0.285959	1.38743e-114	2.51498e-113
Amer1	2.93238	14.7325	-2.42655	0.186009	1.42187e-114	2.57411e-113
Nedd4l	2.49389	7.34083	-1.65532	0.317467	1.63992e-114	2.96506e-113
Rfk	50.8809	16.4451	1.53179	2.89145	1.70405e-114	3.07708e-113
Arhgap24	4.30645	0.24383	4.03718	16.4177	2.10016e-114	3.78753e-113
Cdc42ep1	23.3953	64.7889	-1.56709	0.337487	2.22729e-114	4.01167e-113
Il1rn	24.487	3.11154	2.87727	7.3476	2.74993e-114	4.94672e-113
Mamld1	3.86635	0.0593065	5.89893	59.6698	3.89251e-114	6.99317e-113
Cdc42bpa	9.96306	26.8281	-1.5271	0.346975	3.90288e-114	7.00289e-113
Avpi1	99.5899	34.9929	1.41115	2.65949	6.99726e-114	1.25392e-112
Chst7	4.7498	0.122345	5.16041	35.7634	1.72435e-113	3.08615e-112
Hrsp12	57.0274	12.676	2.07141	4.20296	1.88862e-113	3.37588e-112
Klhl30	0.144676	7.70353	-5.81703	0.0177378	9.60713e-113	1.71509e-111
Rasa3	22.5414	6.1289	1.78101	3.43666	1.22654e-112	2.1869e-111
Dhcr24	74.7895	28.4103	1.2987	2.46007	1.6277e-112	2.8985e-111
Igf1	1.77135	29.4042	-4.14833	0.0563932	2.80136e-112	4.98219e-111
Slc9a2	0	2.03797	-10.9299	0.0005126	3.74232e-112	6.64732e-111
Styk1	28.6023	8.74761	1.61159	3.05588	4.14302e-112	7.34982e-111
Ppp1r3b	0.40522	5.8537	-3.94603	0.0648825	6.77552e-112	1.20049e-110
Gsta3	0.0421103	10.4853	-7.98627	0.0039436	9.67136e-112	1.71143e-110
Serpina3i	4.17	0.0407986	6.51868	91.689	1.25178e-111	2.21236e-110
Gdpd1	0.634798	8.12883	-3.77144	0.073229	1.78986e-111	3.15941e-110
B4galt4	6.81526	27.9554	-2.13412	0.227807	1.83383e-111	3.23299e-110
Ralgds	14.1012	2.66727	2.30387	4.93779	3.04752e-111	5.36598e-110
Wnt10b	5.56344	0.183414	4.81266	28.1031	4.4158e-111	7.76555e-110
Atf5	19.1162	68.4742	-1.93845	0.260896	4.53419e-111	7.96384e-110
Atp8b4	1.77268	0.0269847	5.90403	59.881	4.78448e-111	8.39303e-110
Lphn3	2.68583	0.0360989	6.09804	68.5003	8.51017e-111	1.49102e-109
Phactr2	1.45046	0.0185731	6.15181	71.1014	8.85665e-111	1.5498e-109
Cnnm2	22.9483	2.89354	2.88989	7.41213	1.38416e-110	2.41911e-109
Ifit2	25.7429	7.98825	1.58977	3.01	1.62984e-110	2.84498e-109
Zfpm1	1.77221	17.0746	-3.36438	0.0971001	1.82216e-110	3.17676e-109
Psca	17.4395	0.684155	4.56204	23.6216	2.17769e-110	3.79192e-109
1810011O10Rik	11.745	0.756782	3.85477	14.4677	6.74704e-110	1.17339e-108
Fgf18	1.09891	16.6036	-4.01161	0.061999	9.37538e-110	1.62848e-108
Matn2	16.5584	3.92389	1.9796	3.94384	1.17059e-109	2.03079e-108
Arhgap44	3.68408	22.2056	-2.68988	0.154976	2.45844e-109	4.25978e-108
Cacnb3	20.6258	47.4636	-1.29995	0.40614	3.67602e-109	6.36172e-108
Fads2	175.287	57.6474	1.50632	2.84084	7.05207e-109	1.21894e-107
Flnc	28.8177	61.8679	-1.20025	0.435201	1.01543e-108	1.75302e-107
Hykk	1.76227	0.0272141	5.87677	58.7602	3.4985e-108	6.03235e-107
Plod1	38.9144	12.75	1.51231	2.85266	3.90981e-108	6.73335e-107
Prkar2a	20.5356	45.9245	-1.25915	0.41779	4.25804e-108	7.32414e-107
Asxl3	1.19028	0.0239422	5.52441	46.0272	4.35016e-108	7.4735e-107
P3h2	9.00596	0.913572	3.20188	9.20158	5.81241e-108	9.97351e-107
Celsr2	1.14481	0.0358708	4.88438	29.5355	6.05314e-108	1.0374e-106
Nrp2	43.9494	91.1099	-1.14958	0.450757	7.66337e-108	1.31177e-106
Anxa6	150.765	56.1246	1.32804	2.51061	9.14785e-108	1.56398e-106
Mid1ip1	18.7726	74.4814	-2.08683	0.235397	1.50354e-107	2.56746e-106
Gcnt2	2.0013	10.109	-2.43541	0.184871	2.87614e-107	4.9054e-106
Atp5e	13.5727	87.2332	-2.78302	0.145287	2.96765e-107	5.05537e-106
Il17rc	56.3452	17.4806	1.59051	3.01156	3.14363e-107	5.3487e-106
Phyh	30.5959	5.17096	2.46716	5.52955	4.07435e-107	6.92394e-106
Rragb	4.18067	0.0871961	5.45759	43.9439	5.95049e-107	1.01001e-105
Ppp1r14c	3.77788	0.027616	6.9252	121.533	6.02733e-107	1.02183e-105
Ahcyl1	80.5139	163.733	-1.12201	0.459452	9.53303e-107	1.61422e-105
Ralgps2	1.0689	4.45658	-2.15736	0.224167	1.0567e-106	1.78716e-105
Nfkbia	67.5962	18.3756	1.78137	3.43753	1.14855e-106	1.94018e-105
Gm8773	0.723943	11.0482	-4.02437	0.0614532	1.438e-106	2.42624e-105
Zcchc5	4.41653	0.00678892	9.0132	516.707	2.3959e-106	4.03763e-105
Ptgfr	2.2135	0.00454513	8.59843	387.602	2.57932e-106	4.34155e-105
Aldh1b1	0	3.67005	-11.1772	0.000431841	3.15179e-106	5.29882e-105
Nfe2l3	0.168514	5.03466	-4.98811	0.0315086	3.7259e-106	6.25659e-105
Sema6a	0.0308361	1.8482	-5.96895	0.015965	8.38639e-106	1.40659e-104
Zfp618	5.05432	0.260953	4.17342	18.0436	1.05137e-105	1.76129e-104
Eogt	9.49938	24.5914	-1.46957	0.36109	1.68935e-105	2.82672e-104
Gstm5	59.2197	15.7399	1.81398	3.51612	2.36886e-105	3.95901e-104
Ank3	7.47288	0.906836	2.94327	7.69155	2.4776e-105	4.13587e-104
Hspd1	288.086	585.506	-1.12103	0.459766	3.24031e-105	5.40269e-104
Smarca2	19.9556	6.91181	1.43202	2.69825	3.42251e-105	5.69975e-104
Dlk1	0.0518085	2.20606	-5.48086	0.0223922	4.4497e-105	7.40169e-104
Tspan11	17.25	0.361848	5.47295	44.4143	4.82532e-105	8.01705e-104
Pla2g16	3.75672	0.107417	5.0179	32.3995	5.8164e-105	9.64558e-104
Wasf1	5.7745	18.8495	-1.80454	0.286272	5.81914e-105	9.64558e-104
Asap3	4.09189	0.551142	2.79318	6.93155	1.08238e-104	1.79201e-103
Wls	79.3084	163.342	-1.14031	0.453662	1.1749e-104	1.94291e-103
Cyr61	274.63	660.987	-1.36507	0.388214	1.18987e-104	1.96538e-103
Gm3002	13.7977	3.7248	1.79067	3.45975	1.22064e-104	2.01384e-103
Dhrs9	7.61521	0.851912	3.05982	8.33871	1.73063e-104	2.85191e-103
Ostm1	5.26017	17.3173	-1.81661	0.283888	3.2874e-104	5.41101e-103
Bscl2	4.10366	21.1885	-2.46408	0.181233	5.41889e-104	8.90903e-103
Tm7sf2	17.9588	1.43546	3.54583	11.6789	8.28233e-104	1.36009e-102
Trpm6	2.43635	0.0732893	4.94386	30.7788	1.38169e-103	2.26633e-102
Zfp862-ps	8.37248	2.30076	1.76584	3.40073	2.23348e-103	3.65923e-102
Vdr	30.0462	8.61373	1.70477	3.25976	2.9999e-103	4.90921e-102
Nadk2	28.1965	7.65268	1.78378	3.44327	3.1515e-103	5.15133e-102
Pnpo	1.50804	11.4655	-3.02063	0.123225	5.7549e-103	9.3959e-102
Tspan17	5.61739	0.0837187	5.93902	61.3514	6.08834e-103	9.92884e-102
Tbl1x	30.4665	76.1045	-1.41881	0.37402	7.60292e-103	1.23845e-101
Pacsin3	19.5123	3.60412	2.33752	5.05432	1.17707e-102	1.91514e-101
Adamtsl5	2.88441	10.121	-1.90778	0.266502	1.35042e-102	2.19467e-101
Nrap	2.09848	0.0683892	4.83038	28.4505	1.54131e-102	2.50202e-101
Itpr1	3.82885	10.4544	-1.54742	0.342121	2.39019e-102	3.87555e-101
Rrad	14.6988	1.69311	3.01783	8.09949	2.57565e-102	4.17149e-101
Epb4.1l4a	6.59332	22.2262	-1.85132	0.277139	2.58992e-102	4.18981e-101
4930503E14Rik	7.62195	0.301491	4.55008	23.4266	3.21895e-102	5.20146e-101
Dtna	5.8114	0.128741	5.37164	41.4023	3.48727e-102	5.6286e-101
Zfand3	26.8725	57.8567	-1.20411	0.434038	1.42795e-101	2.30214e-100
Praf2	67.1963	21.1549	1.56984	2.96871	1.4622e-101	2.35468e-100
Cdc16	83.6936	35.0553	1.15762	2.23089	2.96983e-101	4.77707e-100
Pim3	14.1376	40.4948	-1.6154	0.326374	3.15982e-101	5.0769e-100
Mboat2	5.44083	0.14273	5.14606	35.4094	3.16927e-101	5.0863e-100
Mllt4	18.8511	41.8191	-1.24767	0.421129	3.77112e-101	6.04534e-100
Gem	8.23556	0.600511	3.67661	12.787	4.11524e-101	6.58951e-100
Tgif2	7.75879	0.819664	3.1411	8.82195	8.36188e-101	1.33743e-99
Limk2	9.39235	23.6915	-1.43233	0.370531	8.5985e-101	1.37372e-99
Pid1	4.14495	0.194083	4.30871	19.8176	1.30281e-100	2.07905e-99
Casz1	0.0283061	1.80047	-6.07206	0.0148637	1.32908e-100	2.11859e-99
Lmnb1	36.1012	76.6475	-1.18422	0.440061	1.52926e-100	2.43493e-99
Tmem246	2.40108	0.00659923	8.15071	284.189	2.04869e-100	3.25832e-99
Sh3pxd2b	29.3197	11.0466	1.31067	2.48057	2.10386e-100	3.3423e-99
Kpna1	15.1189	34.7162	-1.29721	0.406913	2.16762e-100	3.43973e-99
Ppp2r2b	0.0078672	3.00383	-8.38904	0.00298297	2.36498e-100	3.7487e-99
Col4a5	21.9264	74.9505	-1.87126	0.273334	2.6002e-100	4.11694e-99
Map1b	4.68532	12.7018	-1.53688	0.344629	2.85045e-100	4.50811e-99
Chst2	2.16402	0.103442	4.27863	19.4087	3.50784e-100	5.54161e-99
Zfp521	0.0330762	1.56928	-5.63654	0.0201017	4.09095e-100	6.45558e-99
Irf5	2.95884	15.5398	-2.48842	0.178201	4.33535e-100	6.83361e-99
Epha2	21.5941	52.8337	-1.38853	0.381954	4.96451e-100	7.81662e-99
Ica1	2.26796	14.4528	-2.77067	0.146536	8.23971e-100	1.2959e-98
Sh2d4a	3.85759	0.114723	4.95314	30.9774	1.06169e-99	1.66791e-98
Spry2	10.9047	35.141	-1.78628	0.289918	1.15224e-99	1.80815e-98
Tle2	10.3905	1.56596	2.63153	6.19684	2.11329e-99	3.31261e-98
Armc2	1.77961	0.0408439	5.3191	39.9217	3.86534e-99	6.05228e-98
Tep1	8.13698	2.45606	1.63018	3.09551	7.73857e-99	1.21035e-97
Txndc12	87.8003	29.6158	1.46954	2.76933	1.14318e-98	1.78601e-97
Zbtb38	16.365	4.92181	1.63488	3.10562	1.29103e-98	2.01477e-97
Pde5a	2.70968	0.186804	3.758	13.5292	1.43636e-98	2.2391e-97
Zfp518b	1.90942	6.25002	-1.80797	0.285592	1.89786e-98	2.95527e-97
Tfdp2	5.05835	12.7296	-1.42869	0.371468	2.45878e-98	3.8245e-97
Kcnk10	4.19922	0.0983726	5.29864	39.3595	4.0776e-98	6.33552e-97
Ap1s2	13.4321	2.88018	2.12328	4.35684	5.55517e-98	8.6218e-97
Ppp1r13b	2.57426	11.8226	-2.29824	0.203311	6.54993e-98	1.01545e-96
Inppl1	22.1068	47.0493	-1.1877	0.439003	7.56594e-98	1.17169e-96
Ddx3y	19.9738	46.9832	-1.33223	0.397154	7.93689e-98	1.22779e-96
Ism1	2.91502	0.0235552	6.78256	110.091	1.66924e-97	2.57938e-96
Klhl29	0.264324	3.32142	-3.74551	0.074557	2.20616e-97	3.40534e-96
Steap3	12.8195	3.45076	1.79493	3.47	2.95418e-97	4.55498e-96
Taldo1	48.9155	118.427	-1.3732	0.386034	4.16563e-97	6.41588e-96
Hspb6	32.8536	8.26377	1.89363	3.71569	4.89288e-97	7.5278e-96
Thsd7a	1.48169	0.182897	2.91809	7.55844	5.82042e-97	8.9451e-96
Tdrp	0.851191	10.735	-3.75123	0.074262	6.10107e-97	9.36623e-96
4930452B06Rik	2.75293	0.0361293	6.09983	68.5855	7.08572e-97	1.08661e-95
Pbx1	11.267	23.5313	-1.16014	0.447468	7.50799e-97	1.15011e-95
Mafb	2.78522	0.123543	4.38619	20.9109	1.31735e-96	2.01581e-95
Aff3	0.724965	4.12451	-2.60481	0.164389	1.49217e-96	2.28084e-95
Ak5	9.56574	26.7149	-1.579	0.334715	1.74998e-96	2.67202e-95
Bysl	14.1232	31.888	-1.27285	0.413841	5.95246e-96	9.07894e-95
Plag1	2.44874	0.0731626	4.95463	31.0093	1.10898e-95	1.68964e-94
Fdft1	57.9916	24.2008	1.16295	2.23915	1.18e-95	1.79592e-94
Cdv3	52.4815	107.65	-1.13445	0.455508	1.65517e-95	2.51639e-94
Zdhhc9	19.0811	5.18702	1.78131	3.43737	1.71135e-95	2.599e-94
Ccnd2	43.0448	85.5723	-1.0891	0.470056	2.90421e-95	4.40586e-94
Pard6g	4.7655	0.288459	3.94402	15.391	4.87463e-95	7.38719e-94
Msh6	26.4333	53.4564	-1.11393	0.462034	5.23979e-95	7.93205e-94
Pcdhb16	2.71614	0.183327	3.78706	13.8044	6.795e-95	1.02753e-93
Dync2h1	4.12065	1.23282	1.64258	3.12224	7.60072e-95	1.14815e-93
Plekhg3	7.5293	17.4731	-1.31261	0.402593	1.16056e-94	1.75124e-93
Fmr1	24.2236	53.3512	-1.23714	0.424212	1.81537e-94	2.7364e-93
Eps8	35.1701	96.1332	-1.54893	0.341763	2.59466e-94	3.90692e-93
Mertk	0.240188	4.91394	-4.44366	0.0459541	3.37701e-94	5.07952e-93
Zfp37	2.60007	0.0608238	5.29137	39.1616	4.25418e-94	6.39212e-93
Slc7a1	14.6731	36.0111	-1.39358	0.38062	4.43486e-94	6.65653e-93
Tmem134	52.915	15.7659	1.64949	3.13723	6.12067e-94	9.17711e-93
Clip2	14.5613	4.77569	1.50986	2.84782	1.0728e-93	1.60681e-92
Crim1	50.948	115.769	-1.28226	0.411151	1.28541e-93	1.92322e-92
Cited2	130.617	46.2283	1.4008	2.64049	2.40522e-93	3.59487e-92
Tfrc	35.4921	80.3471	-1.27684	0.412698	3.26828e-93	4.87965e-92
Sh3glb2	17.9023	49.1389	-1.55458	0.340428	3.78419e-93	5.64395e-92
1700048O20Rik	4.74294	0.151267	4.85791	28.9986	4.71343e-93	7.02246e-92
Cdon	8.15014	24.3806	-1.67887	0.312328	6.11185e-93	9.09636e-92
D8Ertd82e	2.7349	9.4162	-1.8818	0.271345	7.37958e-93	1.09716e-91
Cyp1b1	87.5959	199.849	-1.28753	0.409652	8.07719e-93	1.19962e-91
Atp1a1	104.893	209.358	-1.09495	0.468152	9.29511e-93	1.37905e-91
Pofut2	52.8917	21.2042	1.22066	2.33054	2.7495e-92	4.07496e-91
Kcnq1ot1	0.401633	0.0809699	2.21277	4.63564	6.2759e-92	9.29162e-91
Lysmd2	12.2843	0.722567	3.98535	15.8383	6.93167e-92	1.02518e-90
Plekhg4	3.6675	0.327836	3.38356	10.4365	9.19256e-92	1.35814e-90
Gm13251	1.42558	6.36168	-2.25537	0.209443	1.57115e-91	2.31884e-90
Pea15a	48.4937	103.758	-1.19513	0.436746	1.63388e-91	2.40891e-90
Hspa1a	4.47227	0.0856645	5.5913	48.2112	1.82455e-91	2.68721e-90
Eid1	64.1781	25.1179	1.2555	2.3875	2.25932e-91	3.32409e-90
Kif16b	7.24345	2.09053	1.69459	3.23685	2.47233e-91	3.63371e-90
Ctsh	6.16753	0.226457	4.65254	25.151	3.25514e-91	4.77928e-90
Cog4	38.1113	15.2154	1.22685	2.34055	3.3206e-91	4.87032e-90
Axl	75.4112	146.782	-1.05861	0.480096	3.49003e-91	5.11352e-90
Tle1	2.54722	0.372862	2.67344	6.37947	5.88167e-91	8.60879e-90
Plagl1	4.02577	0.178605	4.39525	21.0427	6.24403e-91	9.12971e-90
Emp2	57.0718	23.4254	1.18669	2.27631	7.56596e-91	1.10511e-89
Zdhhc2	9.699	1.6634	2.44514	5.4458	8.5464e-91	1.24703e-89
Gng11	8.76746	0.214432	5.22912	37.5078	9.90709e-91	1.44409e-89
Serinc3	74.8447	30.8199	1.18221	2.26924	1.0419e-90	1.51715e-89
Etv1	2.39477	0.102618	4.43617	21.6481	2.09463e-90	3.04692e-89
Slc20a1	128.55	45.8264	1.39061	2.62189	3.14708e-90	4.57314e-89
Capn6	2.70249	0.154058	4.02507	16.2804	3.47837e-90	5.04935e-89
Zc2hc1a	41.1123	15.3281	1.32522	2.50571	3.70294e-90	5.36984e-89
Gls	27.7567	64.1705	-1.30695	0.404174	4.23674e-90	6.13762e-89
Lox	833.589	278.384	1.48426	2.79773	4.52394e-90	6.54698e-89
Dennd4a	4.40326	12.8449	-1.64257	0.320285	5.28337e-90	7.6382e-89
E330013P04Rik	0.0199503	3.01968	-7.22705	0.00667484	5.73304e-90	8.27982e-89
Gnai1	4.84425	0.371775	3.60316	12.1523	9.38852e-90	1.35453e-88
Nid2	13.5429	87.9462	-2.79726	0.14386	9.62457e-90	1.38717e-88
H2afv	45.3526	13.504	1.65	3.13834	9.84546e-90	1.41757e-88
Ptrf	342.403	149.355	1.09899	2.14204	1.20183e-89	1.72866e-88
Vill	8.88374	1.59881	2.37586	5.19046	1.45015e-89	2.08371e-88
Pyroxd2	0.0262169	2.23019	-6.44603	0.0114697	1.61695e-89	2.32103e-88
Tmem231	9.2622	1.76278	2.29508	4.90781	1.99235e-89	2.85698e-88
Tor1aip2	55.1795	107.803	-1.06406	0.478283	2.06714e-89	2.96123e-88
Larp1b	5.99527	22.3881	-1.99846	0.250267	3.61916e-89	5.17928e-88
Ankrd29	2.49144	0.0396694	5.83312	57.0089	7.07182e-89	1.01101e-87
Hmgcr	46.5031	18.7958	1.20911	2.31195	1.07517e-88	1.53554e-87
Mylip	10.8799	1.47415	2.78467	6.89081	1.68533e-88	2.40452e-87
Csrnp1	2.34232	13.9187	-2.66815	0.157328	2.56273e-88	3.65267e-87
Stx6	31.3968	11.2532	1.38219	2.60664	3.00788e-88	4.28282e-87
Ehd4	19.4794	44.8211	-1.30014	0.406088	3.77262e-88	5.3663e-87
Hoxd8	4.04801	20.863	-2.46452	0.181178	4.13313e-88	5.8732e-87
Ggct	1.31219	11.7374	-3.25792	0.104537	5.47684e-88	7.7748e-87
Abl2	5.02369	11.3736	-1.27661	0.412765	6.27373e-88	8.89712e-87
Scd2	506.586	196.062	1.27157	2.41424	8.10794e-88	1.14868e-86
Ppp1r2	22.9081	47.8649	-1.16085	0.447248	1.50487e-87	2.12986e-86
Lss	28.1736	11.4188	1.20493	2.30526	1.7625e-87	2.492e-86
Pwwp2b	3.63515	16.7788	-2.30483	0.202384	1.87029e-87	2.64176e-86
Capn5	3.58934	0.473593	2.82241	7.07341	1.88591e-87	2.66117e-86
Ung	5.7653	20.9616	-1.95902	0.257204	2.90078e-87	4.08915e-86
Kirrel3	0.221228	3.71923	-4.16407	0.0557817	3.05339e-87	4.29998e-86
Mmab	19.1296	5.94559	1.58793	3.00618	3.30752e-87	4.65324e-86
Gm3696	10.4893	1.79389	2.44973	5.46312	3.74888e-87	5.26893e-86
Fbxl14	6.91455	16.9455	-1.3912	0.381247	4.10685e-87	5.76631e-86
Aplp2	192.319	82.5133	1.12291	2.17785	4.97758e-87	6.98194e-86
Agpat3	9.581	22.6634	-1.34024	0.394954	6.06237e-87	8.49513e-86
Hacd1	26.121	68.0327	-1.47844	0.358876	6.5012e-87	9.10104e-86
Acat2	118.596	53.9671	1.03799	2.05336	8.6147e-87	1.20478e-85
Wt1os	0	1.60655	-10.4904	0.00069515	1.06231e-86	1.48419e-85
D5Ertd605e	1.50608	13.7446	-3.28423	0.102647	1.16993e-86	1.63294e-85
Gramd1b	0.341334	3.85606	-3.59351	0.0828413	1.25893e-86	1.75542e-85
D930015E06Rik	20.188	7.45746	1.33928	2.53025	2.41475e-86	3.36376e-85
Spata13	0.660653	3.28699	-2.4106	0.188078	2.70028e-86	3.7578e-85
Snta1	9.13197	24.2781	-1.50845	0.35149	2.8493e-86	3.96129e-85
Filip1l	19.3143	39.8561	-1.14304	0.452805	2.95044e-86	4.09786e-85
Gpd1l	5.33416	14.4169	-1.53256	0.345664	3.19719e-86	4.43622e-85
Zdhhc15	2.29331	0.164402	3.69843	12.9819	3.87146e-86	5.36653e-85
Pitpnm2	4.36113	11.3757	-1.48021	0.358436	4.88672e-86	6.76722e-85
Osr1	32.7693	10.6549	1.5228	2.87349	6.04241e-86	8.35946e-85
6430548M08Rik	2.40514	16.2723	-2.85481	0.138234	6.8172e-86	9.42213e-85
Coq10b	14.0019	35.3582	-1.43401	0.370101	7.01625e-86	9.68778e-85
Ccser1	0.13373	1.78268	-3.83055	0.0702894	8.0153e-86	1.10564e-84
Traf1	4.96642	0.158787	4.85763	28.9928	1.04627e-85	1.44183e-84
Ern1	3.99775	15.4115	-2.04421	0.242456	1.11925e-85	1.5409e-84
Tns3	14.4515	35.7035	-1.40295	0.378154	1.6514e-85	2.27132e-84
Unc5b	14.2904	50.7113	-1.92468	0.263399	1.93584e-85	2.65995e-84
Tanc2	6.3436	2.20131	1.42898	2.69256	1.96931e-85	2.70331e-84
Llgl2	1.04342	6.51465	-2.73907	0.149781	3.24057e-85	4.44408e-84
Gpr56	10.2123	2.03504	2.22919	4.6887	3.68326e-85	5.04628e-84
Ngef	5.95486	0.163162	5.08169	33.8643	4.13514e-85	5.65989e-84
Abat	0.77582	5.04881	-2.79853	0.143734	4.29095e-85	5.86749e-84
Eya1	6.42699	1.12889	2.41013	5.31521	4.64358e-85	6.34353e-84
Ank1	0.459749	2.60762	-2.60126	0.164795	4.75201e-85	6.48539e-84
Gatsl2	6.97796	1.66142	1.97163	3.92211	4.88549e-85	6.66113e-84
Ccdc148	2.77877	0.0246987	6.66336	101.361	4.97911e-85	6.78224e-84
Acly	141.569	62.1498	1.08985	2.12851	9.63439e-85	1.31108e-83
Glipr1	23.7729	4.3762	2.34265	5.07232	1.02929e-84	1.39934e-83
Atp6v1h	22.8658	51.7438	-1.27616	0.412892	1.32901e-84	1.80507e-83
Pink1	10.4882	1.89731	2.36799	5.16223	1.39159e-84	1.88827e-83
Ctso	2.80768	0.190567	3.77706	13.7091	1.63541e-84	2.21697e-83
Anxa3	186.248	349.884	-1.00741	0.497438	1.73417e-84	2.34861e-83
Dgkd	6.34942	15.3872	-1.37499	0.385555	1.76993e-84	2.39474e-83
Chrnb1	1.58823	10.1167	-2.7678	0.146829	1.84575e-84	2.49494e-83
Sertad4	11.5395	25.6229	-1.24837	0.420924	1.89546e-84	2.55968e-83
Aldh3a1	3.56132	0.0404087	6.29209	78.3623	2.06751e-84	2.78937e-83
Ptprv	0.0450318	2.46031	-5.84416	0.0174074	2.46942e-84	3.32842e-83
Klhl26	26.376	9.89131	1.31692	2.49133	2.80764e-84	3.78069e-83
0610007P14Rik	63.4544	23.217	1.3528	2.55407	3.26958e-84	4.39619e-83
Greb1l	0.790874	3.73413	-2.33809	0.197773	3.27095e-84	4.39619e-83
Rgs4	4.49375	0.287943	3.86094	14.5297	4.94414e-84	6.63867e-83
Fam168b	27.1127	54.2155	-1.0977	0.467261	4.97167e-84	6.6693e-83
Ncl	117.656	235.258	-1.09766	0.467274	5.48845e-84	7.35556e-83
Mmp28	3.44878	0.0788862	5.32139	39.9851	5.50917e-84	7.37634e-83
Basp1	68.8474	151.389	-1.23471	0.424927	5.70912e-84	7.63682e-83
Usp25	9.28819	21.7055	-1.32265	0.399799	7.14387e-84	9.54699e-83
1700007G11Rik	0	7.84331	-10.8535	0.000540469	1.00911e-83	1.34729e-82
Smtnl2	0.409799	11.165	-4.86589	0.0342942	1.07975e-83	1.44024e-82
Pkp4	50.805	21.1936	1.16344	2.2399	1.32835e-83	1.77018e-82
Tmprss6	2.00403	0.0250226	6.16593	71.801	1.65012e-83	2.1969e-82
Lifr	6.60463	13.7169	-1.15213	0.449962	2.27156e-83	3.02141e-82
Synpo	30.4068	6.89827	2.04147	4.11665	2.33118e-83	3.0978e-82
Aplp1	10.5026	26.9635	-1.4578	0.364049	2.56496e-83	3.40525e-82
Hs6st1	15.1355	39.6775	-1.48845	0.356394	2.82465e-83	3.74651e-82
Unc5c	1.22335	0.0799954	3.83228	14.244	3.17517e-83	4.20748e-82
Slc38a6	7.73648	1.24564	2.53651	5.80184	3.51646e-83	4.65535e-82
Gmip	2.78611	10.2084	-1.97211	0.25488	3.68881e-83	4.87896e-82
Grk5	12.8726	2.71103	2.14817	4.43265	4.11338e-83	5.43543e-82
Snn	29.1904	10.2015	1.4193	2.67457	7.58171e-83	1.00091e-81
Pde4d	1.60112	0.135686	3.45872	10.9946	7.92634e-83	1.04543e-81
Lbh	25.7969	147.926	-2.61805	0.162887	8.80825e-83	1.16067e-81
Cdc42bpg	3.95592	0.696479	2.4072	5.30442	9.76033e-83	1.28493e-81
Mbtps1	88.4267	41.4461	0.995299	1.99349	1.01317e-82	1.33257e-81
Osbpl6	0.952043	0.0324252	4.75913	27.0795	1.46105e-82	1.91987e-81
Plcb3	34.8433	15.2921	1.09035	2.12926	1.50831e-82	1.98013e-81
Emx2	1.48595	7.06297	-2.34507	0.196817	1.59963e-82	2.09807e-81
Sfmbt2	6.31854	2.01632	1.54972	2.9276	1.71135e-82	2.24252e-81
Nr4a2	9.55751	0.937547	3.25137	9.52271	2.04574e-82	2.67822e-81
Bmyc	8.66294	0.166025	5.57333	47.6144	2.15299e-82	2.81601e-81
Spcs3	142.802	64.7011	1.04418	2.06219	2.29717e-82	3.00182e-81
Dync2li1	14.2873	2.03377	2.71262	6.55511	4.38883e-82	5.72979e-81
Pik3cb	11.6857	25.7789	-1.23932	0.423571	5.06004e-82	6.6e-81
Acta1	0.850048	7.68018	-3.26947	0.103703	5.31321e-82	6.92382e-81
Cgref1	12.7377	0.512852	4.5325	23.143	5.46793e-82	7.11889e-81
Rarg	66.8517	29.9914	1.05871	2.08306	5.76333e-82	7.49657e-81
Plekhn1	6.38687	0.580341	3.35735	10.2486	6.60348e-82	8.58149e-81
LOC102636514	0	8.83902	-10.3879	0.000746323	6.81006e-82	8.84182e-81
Macrod1	10.8546	0.827651	3.61071	12.2161	8.54e-82	1.10777e-80
Serpinb6b	35.097	71.6339	-1.1269	0.457898	1.08467e-81	1.4057e-80
Ankib1	9.30457	20.9794	-1.27135	0.414271	1.29196e-81	1.67281e-80
Fth1	2090.13	849.381	1.20133	2.29952	1.43617e-81	1.85782e-80
Pus7	12.2417	29.2798	-1.35585	0.390704	2.11393e-81	2.73207e-80
Mrc2	58.7543	23.6301	1.21594	2.32293	2.19899e-81	2.8394e-80
Pitpnm1	24.1477	9.81886	1.20021	2.29773	2.267e-81	2.92455e-80
Siglecg	3.22283	12.9273	-2.09981	0.233289	2.40625e-81	3.10136e-80
Ampd3	13.4904	2.90066	2.11899	4.34391	3.36379e-81	4.33157e-80
L1cam	1.58502	0.0205711	6.11488	69.3048	3.39434e-81	4.36693e-80
Prelid2	0.14248	7.99372	-5.87109	0.0170855	4.48449e-81	5.7642e-80
Klf4	29.3742	8.4246	1.70366	3.25725	4.84218e-81	6.2183e-80
Mum1l1	7.49347	19.374	-1.46812	0.361453	5.05289e-81	6.48301e-80
Stat5a	11.867	3.67131	1.59469	3.02031	5.08662e-81	6.52038e-80
Mid2	2.34156	7.29649	-1.73718	0.299956	5.12194e-81	6.5597e-80
Stk4	9.84445	20.6656	-1.16775	0.445114	6.11202e-81	7.82062e-80
Tmem206	5.17709	14.0413	-1.5364	0.344744	6.24369e-81	7.98188e-80
Npas3	0.029515	1.28966	-5.51823	0.0218196	6.25138e-81	7.98449e-80
Lix1l	41.5171	15.5427	1.31915	2.49519	7.12475e-81	9.09177e-80
Adamts12	1.35966	0.0367747	5.0904	34.0694	8.94368e-81	1.14026e-79
Stmn1	180.131	80.1821	1.06992	2.09931	1.20302e-80	1.53239e-79
Tbc1d16	2.40505	0.195051	3.52247	11.4913	1.21687e-80	1.54863e-79
Aen	12.1538	30.2372	-1.41317	0.375485	1.38945e-80	1.76668e-79
Lgalsl	16.4364	5.38853	1.51097	2.85002	1.53028e-80	1.94399e-79
Cdh18	1.86527	0.00358701	8.45796	351.64	1.71593e-80	2.17788e-79
Itga3	27.3405	58.772	-1.20211	0.434639	1.77962e-80	2.25669e-79
Csad	14.8295	3.99202	1.795	3.47016	1.88568e-80	2.38903e-79
Speer3	0.00835931	5.69776	-9.00914	0.00194079	2.0935e-80	2.64996e-79
Erbb2ip	43.7956	19.1772	1.09351	2.13393	4.33198e-80	5.47852e-79
Col8a1	38.3613	113.771	-1.66682	0.314947	4.77515e-80	6.03358e-79
Raph1	9.13041	20.9526	-1.29668	0.407061	5.16333e-80	6.51825e-79
Cpt1a	50.285	22.4597	1.06502	2.09219	5.2467e-80	6.61759e-79
Emilin1	81.7668	34.6925	1.13887	2.20209	5.45371e-80	6.87255e-79
Zfp827	10.0562	3.48875	1.42888	2.69237	5.57313e-80	7.01679e-79
Dnmt3a	3.13291	7.94813	-1.44068	0.368392	5.83662e-80	7.34199e-79
1700025G04Rik	3.33531	7.61045	-1.28796	0.409529	5.91497e-80	7.43393e-79
Serpina3f	4.67745	0.0176343	7.82576	226.875	7.61419e-80	9.56102e-79
Wnk4	6.80315	0.743443	3.09393	8.5382	8.4349e-80	1.05822e-78
Pcolce2	9.98135	50.7045	-2.44268	0.183942	8.84479e-80	1.10866e-78
Syt13	2.51726	0.199043	3.55568	11.7589	8.88945e-80	1.11327e-78
Il13ra2	5.46944	0.0258414	7.49545	180.449	9.39015e-80	1.17493e-78
Cryl1	10.2905	0.988097	3.27798	9.7	1.12417e-79	1.40537e-78
Esrp2	0.293942	5.05989	-4.19752	0.0545029	1.1833e-79	1.47798e-78
Chd5	1.29235	0.0796077	3.91365	15.0705	1.3649e-79	1.70329e-78
Samd4	6.50819	16.0665	-1.40223	0.378344	1.65894e-79	2.0684e-78
Ptp4a2	58.584	112.307	-1.03673	0.487432	1.8154e-79	2.26149e-78
Wnt5a	38.0801	16.7489	1.08735	2.12483	2.17094e-79	2.70202e-78
Pkp1	2.36999	0.175297	3.65186	12.5695	2.24508e-79	2.79184e-78
Daam2	0.929783	7.61969	-3.13285	0.114004	2.29737e-79	2.85435e-78
Sdc2	60.8078	26.3547	1.10862	2.15639	4.23815e-79	5.26103e-78
Nmnat3	0.503689	5.48882	-3.53654	0.0861777	5.83202e-79	7.23324e-78
Susd6	27.3438	11.8824	1.1047	2.15053	6.14817e-79	7.61866e-78
Adk	46.8166	108.68	-1.31244	0.40264	6.38117e-79	7.90046e-78
Syne2	4.66521	15.6351	-1.8431	0.278722	8.96693e-79	1.10922e-77
Stim1	5.70854	14.115	-1.40366	0.377968	9.66777e-79	1.19487e-77
Scarb1	60.0693	26.4393	1.08593	2.12274	1.26378e-78	1.56058e-77
Zbtb7c	1.63266	6.56442	-2.10516	0.232426	1.39611e-78	1.72248e-77
Epha7	0.914315	0.0103583	6.29781	78.6736	1.65617e-78	2.04155e-77
Foxo3	19.8603	6.27514	1.56372	2.95614	1.86939e-78	2.30238e-77
Mapk4	0.0898161	2.88969	-5.08287	0.0295055	1.95077e-78	2.40052e-77
Klhl14	1.34265	0	10.433	1382.42	1.96756e-78	2.41908e-77
Cftr	0.983053	0.00636492	7.05877	133.322	2.22077e-78	2.72802e-77
Map4k4	33.3618	67.4092	-1.11276	0.46241	2.45299e-78	3.01066e-77
Tgfb2	3.70951	12.099	-1.80405	0.286369	3.73357e-78	4.5784e-77
Snx9	43.4537	90.6838	-1.15939	0.447702	4.85291e-78	5.94587e-77
Dnajc5	26.4969	49.8494	-1.00967	0.496661	5.12833e-78	6.27788e-77
Wnt9a	0.850061	9.79049	-3.61865	0.0814102	5.21747e-78	6.38147e-77
Serpina3h	3.07372	0.0486438	5.8357	57.1113	5.74225e-78	7.01726e-77
Elmo1	0.0220554	1.20285	-5.83033	0.017575	5.80819e-78	7.09171e-77
Chic1	1.25384	0.0417142	4.79462	27.7539	6.4103e-78	7.82012e-77
Akr1c14	14.4819	1.62681	3.05541	8.31321	7.21252e-78	8.79119e-77
Klf12	2.23103	0.140614	3.88412	14.7651	7.29386e-78	8.88268e-77
Mtx2	31.5905	72.1828	-1.28945	0.409108	7.37656e-78	8.97567e-77
Tbc1d1	10.7646	21.6411	-1.10531	0.464804	1.02889e-77	1.25085e-76
Arhgap21	12.1807	23.7861	-1.06353	0.478459	1.0829e-77	1.31538e-76
Hspa9	173.005	320.177	-0.986039	0.504862	1.38631e-77	1.68249e-76
Fhod3	0.1642	2.81932	-4.18958	0.0548037	1.65998e-77	2.0129e-76
Fsd1	8.87262	0.830405	3.31523	9.95365	1.83117e-77	2.21859e-76
Tmem62	2.364	8.98482	-2.02339	0.24598	2.44589e-77	2.96083e-76
Tnrc6b	7.37258	2.85074	1.27266	2.41606	2.53467e-77	3.06567e-76
Cav1	205.225	370.491	-0.95019	0.517564	2.7293e-77	3.29826e-76
Tubb6	108.808	202.172	-0.991738	0.502872	3.50364e-77	4.2304e-76
Lrrc75a	1.19092	7.96473	-2.83666	0.139985	4.29987e-77	5.18736e-76
Arl15	15.3545	3.64953	1.97433	3.92946	4.60168e-77	5.54673e-76
Arhgef40	33.1418	15.1703	1.02973	2.04164	5.69352e-77	6.85696e-76
P2rx4	29.3544	8.88799	1.62602	3.0866	6.8169e-77	8.2029e-76
Calcoco1	26.1161	5.24744	2.21695	4.64909	7.98698e-77	9.60271e-76
Calcrl	4.05366	0.564085	2.74624	6.70965	8.60154e-77	1.03328e-75
Foxc2	2.9472	0.0878838	4.95173	30.9471	8.8799e-77	1.06581e-75
Rgl1	1.6473	6.51295	-2.08089	0.236369	9.08357e-77	1.08933e-75
Spry1	1.79954	11.2514	-2.74139	0.149541	1.10037e-76	1.31848e-75
Cib2	10.0022	0.36604	4.65799	25.2461	1.28129e-76	1.53397e-75
Setd8	47.2284	89.9992	-1.02813	0.490346	1.39413e-76	1.66765e-75
Ankrd6	1.68368	0.0325617	5.55595	47.0445	3.00061e-76	3.58628e-75
Cmtm7	39.6164	98.0461	-1.40521	0.377564	3.50594e-76	4.18669e-75
Tspan12	3.11749	0.104155	4.78777	27.6224	3.57068e-76	4.26041e-75
Gm21949	11.5822	27.2853	-1.33393	0.396685	4.47273e-76	5.33221e-75
Idh3a	36.9905	74.6652	-1.11137	0.462853	4.7645e-76	5.67525e-75
Chd1	14.5957	29.591	-1.11764	0.460848	5.51052e-76	6.55836e-75
Eno3	20.8912	47.9453	-1.29558	0.407371	6.78398e-76	8.06718e-75
Srgap3	5.4121	1.47025	1.78126	3.43725	7.95734e-76	9.45453e-75
Thra	31.3686	9.49579	1.62572	3.08596	9.55187e-76	1.13395e-74
Cdc42ep4	18.4302	6.50264	1.40493	2.64806	1.12625e-75	1.33591e-74
Ndufb10	64.1055	136.759	-1.19101	0.437995	1.24666e-75	1.4775e-74
Cpeb2	0.895201	3.53077	-2.07741	0.236939	1.59118e-75	1.88423e-74
Spata6	12.7625	3.13221	1.92854	3.8067	1.77853e-75	2.10432e-74
Ecm1	258.61	66.753	1.85631	3.62081	2.19361e-75	2.59326e-74
Palld	60.9805	123.437	-1.11485	0.461739	2.38056e-75	2.81193e-74
Meis2	6.14775	14.6777	-1.35307	0.391458	3.06782e-75	3.62069e-74
Rab23	23.7168	9.65714	1.19851	2.29503	3.57293e-75	4.21331e-74
Atn1	38.3327	70.4978	-0.976766	0.508118	4.18883e-75	4.93549e-74
Trim6	0	1.56433	-10.6802	0.000609472	4.99138e-75	5.8762e-74
Tmem64	9.05855	20.1754	-1.2525	0.41972	5.67911e-75	6.68027e-74
Ift74	29.9671	9.74279	1.52324	2.87436	6.78667e-75	7.97645e-74
Msmo1	178.74	76.7951	1.12102	2.17501	7.51077e-75	8.82016e-74
Ccdc102a	21.0002	6.37344	1.6223	3.07865	1.02076e-74	1.19773e-73
Hecw2	0.133317	1.24324	-3.31769	0.100294	1.28695e-74	1.5088e-73
Prss35	2.9682	0.0749531	5.18309	36.3301	1.37864e-74	1.61497e-73
Lphn2	33.5301	14.8673	1.07544	2.10737	1.70762e-74	1.99867e-73
Abhd1	14.1738	2.46644	2.42335	5.36415	2.01653e-74	2.35829e-73
Sobp	1.14125	0.0139431	6.1793	72.4692	2.05433e-74	2.40051e-73
Bcl2l1	28.009	54.0374	-1.04591	0.484341	2.48421e-74	2.90044e-73
2510009E07Rik	3.08791	0.536273	2.42671	5.37666	2.91791e-74	3.40399e-73
Slc9a3r2	8.65685	27.3903	-1.75998	0.295252	3.40723e-74	3.97155e-73
Phldb2	62.9729	133.281	-1.17919	0.4416	4.98023e-74	5.80029e-73
Rtn4rl2	0.451641	5.87589	-3.78937	0.0723248	4.99943e-74	5.81785e-73
Pax3	0	1.22132	-10.1424	0.000884775	5.64552e-74	6.56431e-73
Arxes1	2.49165	11.6617	-2.32414	0.199693	5.75137e-74	6.6819e-73
Rgs17	0.833408	0.0354898	4.43559	21.6394	8.87063e-74	1.02974e-72
Ube2q2	11.607	28.2885	-1.38322	0.383363	9.05112e-74	1.04983e-72
Tctn2	10.0002	2.39727	1.96226	3.89673	1.48501e-73	1.72103e-72
Strbp	1.31736	3.71792	-1.59435	0.331172	2.92554e-73	3.38773e-72
Npcd	7.18487	17.3435	-1.36899	0.387161	3.17874e-73	3.67792e-72
Maff	9.67082	25.0631	-1.47194	0.360497	5.54841e-73	6.41447e-72
Ganab	134.701	66.5471	0.919389	1.89131	6.07275e-73	7.01492e-72
Kank3	4.9906	0.58241	2.99905	7.99474	7.40286e-73	8.54441e-72
Glis1	4.40171	0.267434	3.93622	15.308	8.02886e-73	9.25939e-72
Cryab	531.785	185.653	1.42024	2.67631	8.11456e-73	9.35059e-72
Neurl3	2.35053	0.0542836	5.31015	39.6746	1.15936e-72	1.33487e-71
Pcdhb17	4.53037	0.332458	3.66667	12.6992	1.56714e-72	1.80292e-71
Zyx	185.298	343.127	-0.986567	0.504677	1.86218e-72	2.1406e-71
Ddit4	24.0195	4.55828	2.29839	4.9191	1.98818e-72	2.28358e-71
Tmem37	6.65804	0.206517	4.89504	29.7546	2.54474e-72	2.92046e-71
Fez2	76.7161	146.147	-1.02789	0.490427	2.83706e-72	3.2533e-71
Nol4	2.11721	0.0840481	4.53499	23.1829	3.44638e-72	3.94881e-71
Cldn12	15.4689	39.7346	-1.45898	0.363751	4.40717e-72	5.04559e-71
Nop58	86.1351	164.87	-1.03461	0.488146	4.78442e-72	5.47305e-71
Tmem50b	20.4821	6.5104	1.55536	2.93906	6.4805e-72	7.40726e-71
Pde10a	0.209519	1.91608	-3.29138	0.10214	6.4858e-72	7.40732e-71
Il13ra1	33.609	13.5206	1.21607	2.32314	7.13263e-72	8.13949e-71
Tns4	0.133159	1.82424	-3.8681	0.0684834	8.31321e-72	9.47908e-71
Ctnna1	91.663	160.367	-0.904896	0.534071	1.0655e-71	1.21395e-70
Cand2	9.48161	3.05501	1.53618	2.90026	1.11858e-71	1.2734e-70
Fam188a	10.582	24.1665	-1.2891	0.409205	1.39203e-71	1.58341e-70
Bzw1	122.205	218.37	-0.935351	0.522915	1.59249e-71	1.80999e-70
Memo1	33.7366	71.0916	-1.17367	0.443293	1.82299e-71	2.0703e-70
Vash2	9.05799	2.64236	1.67859	3.20115	1.98772e-71	2.25557e-70
Prcp	22.1804	7.82543	1.40524	2.64862	2.06201e-71	2.33799e-70
Cbx5	27.7754	50.8542	-0.970515	0.510324	2.46432e-71	2.79191e-70
Ppl	1.047	0.0333531	4.85106	28.8612	3.6135e-71	4.09057e-70
Pdia6	289.239	133.494	1.01794	2.02503	3.82326e-71	4.32457e-70
Zfp182	0.0139517	1.02733	-6.25129	0.0131272	4.20192e-71	4.74907e-70
Raet1e	0.168428	5.64093	-5.14155	0.0283294	4.5776e-71	5.16954e-70
Bcl2	1.77283	5.03663	-1.6039	0.328986	5.56132e-71	6.27546e-70
Clip3	30.4151	12.1825	1.22228	2.33316	5.81375e-71	6.55507e-70
Birc6	14.7013	28.916	-1.07408	0.474973	6.05438e-71	6.82094e-70
Prr9	0.034872	4.44892	-6.97916	0.00792616	6.57069e-71	7.39674e-70
Slc43a2	5.17712	0.757068	2.67527	6.38758	6.98491e-71	7.85677e-70
Gm13157	1.09029	6.3235	-2.63192	0.161329	7.41487e-71	8.33377e-70
Pign	7.98173	16.6934	-1.16286	0.446626	8.17402e-71	9.17971e-70
Rnpepl1	4.2787	13.9708	-1.80529	0.286124	8.46929e-71	9.50375e-70
Slc2a10	0.0387119	1.7779	-5.58264	0.0208669	1.00182e-70	1.12329e-69
Podxl2	4.44383	0.248875	4.05089	16.5745	1.18189e-70	1.32415e-69
Gm15663	0.0062147	1.39456	-7.62282	0.00507343	1.23355e-70	1.38093e-69
Abr	14.3132	30.5481	-1.19161	0.437813	1.34703e-70	1.50677e-69
9930012K11Rik	3.55256	17.1732	-2.36889	0.193595	1.51881e-70	1.69758e-69
Adamtsl3	6.66133	0.940742	2.7269	6.62032	1.83623e-70	2.05074e-69
Slc7a5	32.5407	82.2641	-1.43654	0.369451	1.84848e-70	2.0628e-69
St6galnac2	2.46319	0.0147098	7.12683	139.762	2.01519e-70	2.24707e-69
Rdh11	40.4281	14.3479	1.39629	2.63223	2.04171e-70	2.27484e-69
AI839979	4.69697	0.110298	5.275	38.7199	2.07612e-70	2.31135e-69
Akap12	110.787	44.6319	1.21347	2.31894	2.1301e-70	2.36959e-69
Fam46b	2.89222	10.57	-1.96608	0.255948	2.47581e-70	2.752e-69
Gfra1	2.83424	0.301881	3.13067	8.75843	2.50115e-70	2.77799e-69
Mrps18b	38.8614	82.9078	-1.19098	0.438005	2.52964e-70	2.80742e-69
Rgl3	2.02385	7.8893	-2.06047	0.239738	2.58719e-70	2.86904e-69
Tnfrsf12a	101.206	218.868	-1.2106	0.432089	2.72223e-70	3.01643e-69
Tfcp2l1	0.0352373	1.05419	-4.98599	0.0315549	3.09455e-70	3.4263e-69
Adra1d	3.58565	0.204434	4.02806	16.3142	3.21497e-70	3.55684e-69
Fzd3	0.733143	0.0703942	3.27861	9.70419	3.46676e-70	3.83241e-69
Rbm38	4.45947	16.6484	-1.99815	0.25032	4.63117e-70	5.11564e-69
Prr5l	1.04209	6.16628	-2.66409	0.157771	4.81416e-70	5.31361e-69
Wdr43	44.7173	81.9387	-0.97148	0.509983	5.2768e-70	5.81971e-69
Arxes2	2.70038	12.6348	-2.32332	0.199808	7.67185e-70	8.45459e-69
Epb4.1l4b	2.4007	0.100895	4.45945	22.0002	8.2517e-70	9.08651e-69
Adamts3	0.0885371	1.06164	-3.67115	0.0785005	8.37289e-70	9.21278e-69
Impdh1	15.8737	36.8847	-1.31427	0.40213	9.53414e-70	1.04824e-68
Ube2f	17.666	44.9011	-1.44282	0.367849	9.72688e-70	1.0686e-68
Lpar2	2.17499	6.70198	-1.7204	0.303465	1.06855e-69	1.173e-68
Sox9	4.95251	1.14608	2.01284	4.03577	1.33787e-69	1.46751e-68
Tnni1	0.0943486	6.69172	-6.199	0.0136118	1.40723e-69	1.54239e-68
Szt2	6.09181	2.3864	1.25422	2.38538	1.42021e-69	1.55541e-68
D630003M21Rik	1.44451	0.0101527	6.92739	121.717	1.4531e-69	1.5902e-68
B3glct	5.1652	1.21939	1.98418	3.95637	1.49833e-69	1.63842e-68
Dnm3	1.34425	0.131163	3.25534	9.54894	1.76272e-69	1.92605e-68
Ccdc90b	18.305	5.10728	1.74367	3.34885	2.09597e-69	2.28841e-68
Arid5b	23.5657	10.673	1.0446	2.06279	2.63226e-69	2.87172e-68
Col5a2	256.907	569.616	-1.24667	0.421419	2.79384e-69	3.04565e-68
Atic	60.2353	125.086	-1.15224	0.449926	2.8434e-69	3.09729e-68
Slc52a3	0.0390168	2.20642	-5.87308	0.0170618	2.99087e-69	3.25542e-68
Sos1	6.73711	15.8106	-1.32841	0.398208	3.81682e-69	4.15123e-68
Coa5	21.2925	39.7358	-0.998156	0.500639	3.86684e-69	4.2024e-68
Kremen1	9.57561	2.99345	1.57943	2.98851	6.22381e-69	6.75871e-68
Arpc2	126.882	234.632	-0.984976	0.505234	7.20805e-69	7.82153e-68
Slc5a3	7.79395	2.41242	1.59375	3.01833	1.24783e-68	1.353e-67
Nab1	20.0354	39.3599	-1.07217	0.475602	1.64991e-68	1.78759e-67
Gm37013	48.4574	20.2851	1.15894	2.23293	1.79418e-68	1.94241e-67
Tgfbrap1	3.4197	9.54269	-1.57923	0.33466	2.13003e-68	2.30424e-67
Rrs1	19.1216	40.9412	-1.19633	0.436384	2.13535e-68	2.30823e-67
Prkg1	2.27948	0.31777	2.74322	6.69565	2.65048e-68	2.86288e-67
Angpt1	2.22747	0.0853954	4.59371	24.146	2.85916e-68	3.08593e-67
Tmem136	1.67608	0	10.5536	1502.98	2.98285e-68	3.21697e-67
Vapa	53.9081	99.9773	-0.988749	0.503915	3.3469e-68	3.60684e-67
Rab39b	7.43517	0.659934	3.3918	10.4963	3.78247e-68	4.07314e-67
Snca	5.85819	0.0773735	6.09353	68.2865	3.86959e-68	4.16378e-67
Slc27a6	0.015879	1.96442	-6.93493	0.00817293	4.44639e-68	4.7808e-67
Ephb2	7.30101	17.3289	-1.34479	0.393711	6.30473e-68	6.77375e-67
Comtd1	3.13626	12.108	-2.04678	0.242023	6.40752e-68	6.87896e-67
Lrrc1	3.79788	11.3781	-1.68062	0.311948	1.09185e-67	1.1713e-66
Lpin1	5.27544	0.693745	2.82751	7.09847	1.1263e-67	1.20734e-66
Zfp709	1.41505	0.025032	5.67126	50.9588	1.60319e-67	1.71724e-66
Crmp1	1.753	0.0268552	5.86831	58.4167	1.81475e-67	1.94237e-66
Trak2	8.71449	17.2722	-1.08493	0.471414	2.71246e-67	2.90102e-66
Cxx1b	41.4521	15.2584	1.3439	2.53837	3.23917e-67	3.46172e-66
Ntng2	0.591266	5.0806	-3.19267	0.109373	3.41514e-67	3.64703e-66
Pacs1	19.2208	7.87328	1.18962	2.28092	5.42259e-67	5.78641e-66
Fam118b	9.35283	24.3935	-1.48121	0.358188	6.06774e-67	6.46997e-66
Scp2	48.228	21.2473	1.08498	2.12134	6.30554e-67	6.71847e-66
Kitl	2.42754	7.54231	-1.73377	0.300666	6.3243e-67	6.73338e-66
Pdzd2	0.156448	1.44613	-3.30403	0.101248	6.43495e-67	6.84603e-66
Actr3	116.242	203.484	-0.905838	0.533723	7.0068e-67	7.44881e-66
Sbno2	33.7906	15.8043	0.998645	1.99812	7.20944e-67	7.65848e-66
Cgnl1	12.2481	3.0717	1.89655	3.72321	8.7634e-67	9.30223e-66
Cd9	331.645	144.853	1.09718	2.13937	8.80746e-67	9.34199e-66
Hal	0.130398	9.71823	-6.31141	0.0125915	1.03033e-66	1.09204e-65
Figf	31.7772	6.06235	2.29153	4.89574	1.43054e-66	1.51508e-65
Cndp2	11.743	27.3052	-1.31471	0.402007	1.51507e-66	1.60341e-65
Gm5577	3.92795	0.125976	4.83741	28.5893	1.67005e-66	1.7661e-65
Sorbs3	36.4607	72.6315	-1.09188	0.46915	1.68478e-66	1.77958e-65
C530008M17Rik	1.0346	0.0392032	4.60025	24.2557	1.68531e-66	1.77958e-65
Cdkn2a	190.556	73.3204	1.28021	2.42875	1.76883e-66	1.86638e-65
Ppp2r5d	37.4634	66.3136	-0.921498	0.527961	1.83984e-66	1.93986e-65
Myh9	169.459	78.0449	1.02071	2.02892	2.34375e-66	2.46932e-65
H2-K1	32.7802	9.98157	1.61766	3.06876	3.26304e-66	3.43531e-65
Rbm47	0.370147	2.6062	-2.91278	0.13279	3.5661e-66	3.75157e-65
Trmt6	12.7222	27.6518	-1.2178	0.429938	4.27297e-66	4.49186e-65
3300005D01Rik	1.08068	14.1141	-3.79873	0.071857	5.19942e-66	5.46171e-65
Nphp4	1.50709	0.0773883	4.17572	18.0724	5.22395e-66	5.4834e-65
Pde8b	3.07918	0.314252	3.18993	9.12567	6.40748e-66	6.72073e-65
Calr	1156.9	572.897	0.916091	1.887	6.59915e-66	6.91664e-65
Galnt12	0.66891	4.88028	-2.96481	0.128087	7.50296e-66	7.8581e-65
Sema4d	1.84257	0.0744216	4.51522	22.8674	1.12795e-65	1.18047e-64
Pgap1	1.00754	2.93027	-1.63833	0.321229	1.32725e-65	1.38801e-64
Enoph1	18.195	39.5776	-1.21918	0.429527	1.71771e-65	1.79502e-64
Pcdhgb8	0.097733	1.68386	-4.20061	0.0543865	1.9063e-65	1.99063e-64
Ptpdc1	4.09548	0.853523	2.16343	4.47978	2.14889e-65	2.2423e-64
Stim2	7.50053	15.8094	-1.17355	0.443328	2.88948e-65	3.01286e-64
Slc39a8	1.7141	0.0824971	4.26252	19.1931	2.96271e-65	3.08694e-64
Tpd52	11.6404	25.3347	-1.21976	0.429354	2.9988e-65	3.12224e-64
Mfsd7b	3.83706	9.41055	-1.39158	0.381147	3.70245e-65	3.85202e-64
Tmem119	20.9597	5.66553	1.78948	3.4569	3.90415e-65	4.05888e-64
Arfgap3	36.2433	13.7399	1.30158	2.46499	4.35815e-65	4.52755e-64
Rassf1	28.9302	60.4952	-1.16192	0.446917	4.68153e-65	4.85992e-64
Cryz	11.732	3.01747	1.86112	3.6329	5.69492e-65	5.90759e-64
Pi4ka	13.2182	25.5682	-1.04999	0.482972	5.80876e-65	6.02127e-64
Scpep1	160.657	72.5114	1.05002	2.07056	5.86552e-65	6.07565e-64
Inhba	17.7916	41.3579	-1.31528	0.401849	6.54821e-65	6.77783e-64
Mgst3	19.049	1.47153	3.58998	12.0418	7.93903e-65	8.21141e-64
Slc6a8	16.55	39.5927	-1.35594	0.390681	8.75161e-65	9.04525e-64
Syngr2	35.0821	65.8197	-1.00556	0.498077	9.01109e-65	9.30663e-64
Lats2	95.9074	185.972	-1.05345	0.481816	9.33337e-65	9.63245e-64
Atp1b1	53.6791	136.37	-1.44319	0.367753	9.3554e-65	9.64814e-64
Ipmk	13.5175	5.68606	1.15148	2.22141	1.01359e-64	1.04454e-63
Lin7c	25.918	46.392	-0.937916	0.521986	1.02814e-64	1.05876e-63
Ttc37	20.1921	9.54673	0.982794	1.97629	1.38306e-64	1.42322e-63
Gm996	1.51786	0.0916027	3.94315	15.3818	1.5741e-64	1.61863e-63
Invs	6.52143	2.19008	1.47592	2.7816	1.75312e-64	1.8014e-63
Myl12b	77.2909	165.427	-1.19504	0.436775	2.53864e-64	2.60667e-63
Coro2b	1.12423	6.16235	-2.54986	0.170771	2.66209e-64	2.73145e-63
Npy4r	0.00542525	2.02514	-8.19371	0.00341544	2.82415e-64	2.89563e-63
Lhfpl4	1.10426	0.0270894	5.20795	36.9614	3.00851e-64	3.08241e-63
Dcbld1	4.54898	0.428049	3.3085	9.90733	3.22391e-64	3.30072e-63
E030011O05Rik	9.57798	0.402719	4.45198	21.8867	3.37395e-64	3.45183e-63
Kif5b	31.171	57.4888	-0.98122	0.506551	4.04894e-64	4.13941e-63
Dusp18	9.06831	2.88132	1.55517	2.93868	4.88603e-64	4.99158e-63
Celf2	7.2491	15.7379	-1.21664	0.430283	4.92158e-64	5.02428e-63
Pcyt1a	17.0344	31.4021	-0.979976	0.506988	6.45402e-64	6.58394e-63
Wdr6	50.2764	20.0118	1.23089	2.34711	6.53559e-64	6.66234e-63
Arhgef25	65.9277	27.4644	1.16566	2.24336	6.58573e-64	6.70862e-63
H2-M3	2.95782	12.1683	-2.13625	0.227471	7.36229e-64	7.49428e-63
Fam73a	3.18449	0.348444	3.08941	8.51147	8.78659e-64	8.93767e-63
Zfp568	3.88858	8.65887	-1.25268	0.419667	8.92752e-64	9.0745e-63
Msn	201.49	397.68	-1.07881	0.473419	1.01912e-63	1.03515e-62
Nek9	23.3032	10.0196	1.12011	2.17364	1.14079e-63	1.15791e-62
Shank2	0.0963301	1.86027	-4.35836	0.0487533	1.51174e-63	1.53332e-62
4930486L24Rik	0.179205	4.35518	-4.68614	0.0388446	1.67158e-63	1.69423e-62
2610318N02Rik	8.16123	0.376113	4.326	20.0565	1.71959e-63	1.74164e-62
Tnfrsf11a	0.878213	0.00992765	6.27053	77.2002	1.73637e-63	1.75738e-62
Gphn	4.77663	0.239978	4.21457	18.5657	1.79569e-63	1.81611e-62
Cd99l2	24.5642	10.7236	1.09756	2.13992	1.80267e-63	1.82187e-62
Ssh2	2.31492	5.87091	-1.44107	0.368294	2.52484e-63	2.54991e-62
Zfp422	6.50904	15.5758	-1.35689	0.390424	2.74996e-63	2.77528e-62
Mapk14	27.2324	51.0946	-1.00595	0.497943	2.86976e-63	2.89411e-62
Sparc	615.148	1250.63	-1.12148	0.459623	2.96236e-63	2.98537e-62
Pcdhgc3	39.3922	19.3063	0.930912	1.90648	2.98397e-63	3.00501e-62
Tnfsf18	0.66878	29.6764	-5.56896	0.0210658	3.76498e-63	3.78883e-62
Tcaf1	28.2665	11.5613	1.19201	2.2847	4.06077e-63	4.08358e-62
Hip1	13.2006	25.1874	-1.02952	0.489873	4.62674e-63	4.64943e-62
Uba1	152.835	79.3462	0.847918	1.7999	4.90501e-63	4.92556e-62
Hsd17b11	25.1493	5.32605	2.14074	4.40989	4.97711e-63	4.99442e-62
Lipg	2.05143	8.67037	-2.17741	0.221073	6.15882e-63	6.17586e-62
Pdgfra	14.1391	25.7337	-0.961988	0.513349	6.34709e-63	6.36013e-62
1810019D21Rik	0.194739	3.53834	-4.26408	0.0520457	6.35879e-63	6.36735e-62
Mycl	0.236546	2.2731	-3.35678	0.0976134	7.4514e-63	7.45614e-62
Itgb2	0.324053	2.92469	-3.26595	0.103957	7.86912e-63	7.86856e-62
Plscr1	32.3311	58.8124	-0.961147	0.513648	1.07545e-62	1.07462e-61
Fasn	82.6738	41.4776	0.897212	1.86246	1.15224e-62	1.15053e-61
Serpinb9b	48.9205	15.4859	1.56212	2.95287	1.43661e-62	1.43347e-61
Enpp1	2.84984	0.318446	3.06083	8.34455	1.44537e-62	1.44119e-61
Osbpl3	9.07969	20.8997	-1.30085	0.405886	1.45719e-62	1.45195e-61
Pcdh9	3.09759	0.131862	4.45159	21.8807	1.49816e-62	1.49172e-61
Thbd	0.0794791	2.47215	-5.03757	0.0304468	1.54172e-62	1.53402e-61
Mybl2	9.75552	21.5545	-1.2415	0.422931	1.62717e-62	1.6179e-61
Mxi1	11.2301	3.52945	1.57211	2.9734	1.74763e-62	1.73646e-61
Zfp354c	9.79492	3.49999	1.3866	2.61462	2.03913e-62	2.02466e-61
Sardh	12.9958	27.0503	-1.15569	0.44885	2.19835e-62	2.18122e-61
Baiap2	45.3084	20.4812	1.04734	2.06671	2.43478e-62	2.41412e-61
Olfml3	19.3524	50.6145	-1.4844	0.357398	2.62164e-62	2.59758e-61
Sema3a	9.2421	21.0337	-1.2839	0.410684	3.43826e-62	3.40431e-61
Inafm2	5.36572	14.1445	-1.49598	0.354539	3.72482e-62	3.68546e-61
Gda	2.52221	8.74247	-1.8907	0.269675	4.21438e-62	4.16693e-61
Tspyl1	33.8186	14.3738	1.13624	2.19808	4.32663e-62	4.27492e-61
Csgalnact1	2.71499	0.234713	3.43089	10.7845	4.33479e-62	4.28e-61
Tlr3	2.72183	0.315316	3.00858	8.04771	4.668e-62	4.60578e-61
Uck1	13.3385	32.5385	-1.3839	0.383181	6.22325e-62	6.13602e-61
Tmem5	20.966	45.1312	-1.20364	0.434178	7.09967e-62	6.99528e-61
Cstb	157.9	368.766	-1.32131	0.400172	7.31956e-62	7.20691e-61
Tcp11l2	7.31588	1.05513	2.69564	6.47842	8.81966e-62	8.67788e-61
Rrm1	75.26	130.604	-0.893358	0.538359	9.07405e-62	8.92198e-61
Rras	36.2124	11.9362	1.50322	2.83474	9.39528e-62	9.2314e-61
Mccc1	4.38305	11.0846	-1.43628	0.369518	9.74259e-62	9.566e-61
Bpnt1	11.4214	26.3894	-1.30602	0.404434	9.88043e-62	9.69461e-61
Ctps2	13.1118	5.04365	1.28047	2.42918	1.00831e-61	9.88662e-61
Myo1c	85.1384	147.145	-0.887286	0.54063	1.01361e-61	9.9317e-61
Gpr116	0.0658471	1.015	-4.03785	0.0608816	1.02391e-61	1.00257e-60
Lamp2	254.599	126.483	0.911391	1.88086	1.04882e-61	1.02625e-60
Neil3	18.8045	6.11456	1.5226	2.87309	1.26533e-61	1.23724e-60
Dpysl2	11.3628	4.06147	1.38636	2.61419	1.34621e-61	1.31541e-60
Fam102b	25.6402	11.8699	1.01291	2.01798	1.40899e-61	1.37581e-60
Olfml2b	12.8095	28.3739	-1.2446	0.422024	1.61306e-61	1.57399e-60
Anpep	3.95425	0.469166	2.97578	7.86684	1.71817e-61	1.6754e-60
Slc38a1	8.81649	17.1207	-1.05543	0.481153	1.79204e-61	1.74622e-60
Csf1	289.704	542.139	-1.00163	0.499434	2.00278e-61	1.95023e-60
Otud1	2.73994	0.165565	3.93972	15.3452	2.31379e-61	2.25153e-60
Adam9	100.544	173.283	-0.883104	0.5422	2.3638e-61	2.29861e-60
Srf	15.2777	27.9989	-0.971911	0.50983	3.11165e-61	3.02376e-60
Zfp52	7.25006	1.84374	1.87608	3.67075	3.12674e-61	3.03633e-60
Lama2	0.576196	0.0123098	5.41006	42.5197	3.21984e-61	3.12459e-60
Serpinf1	333.648	131.904	1.24106	2.36372	3.29556e-61	3.19588e-60
Adam8	5.7246	0.68516	2.96305	7.79769	3.32376e-61	3.22101e-60
Fdxr	4.30704	19.3879	-2.26868	0.20752	3.96627e-61	3.84104e-60
Exo5	11.4021	2.24874	2.24218	4.73111	4.15649e-61	4.0225e-60
Mkl1	42.5102	20.5031	0.954192	1.93749	1.0461e-60	1.01168e-59
9630033F20Rik	3.73983	9.11794	-1.38303	0.383412	1.05151e-60	1.01622e-59
Tpm2	124.205	55.4501	1.06592	2.09351	1.12692e-60	1.08835e-59
Galnt11	14.8579	4.90499	1.50025	2.82891	1.4473e-60	1.39682e-59
Mpzl1	33.212	14.5235	1.09547	2.13683	1.68056e-60	1.62084e-59
Ndrg4	15.5783	6.13061	1.24752	2.37433	1.70632e-60	1.64456e-59
Tgfbr2	74.2058	32.2455	1.10436	2.15003	1.72492e-60	1.66135e-59
Spr	28.5776	65.3026	-1.29021	0.408892	1.77494e-60	1.70837e-59
Mllt3	14.5527	5.26735	1.3682	2.58148	2.21857e-60	2.1339e-59
Naip2	0.0882121	1.30025	-3.9676	0.0639195	2.47021e-60	2.37432e-59
Sptlc2	17.3842	35.2479	-1.11794	0.46075	2.48101e-60	2.38308e-59
Rab38	2.18515	0	9.78596	882.811	2.49164e-60	2.39167e-59
Dio3	3.43991	0.0640067	5.60864	48.7943	2.67901e-60	2.56978e-59
Timm23	107.795	198.385	-0.97758	0.507831	2.97077e-60	2.84771e-59
Vgll3	34.9854	64.2132	-0.973725	0.50919	3.57888e-60	3.42831e-59
Gstt1	15.1315	3.14202	2.16942	4.49841	4.09804e-60	3.92297e-59
Irx3	2.54849	0.0717421	5.02589	32.5794	5.03737e-60	4.8189e-59
Klf13	10.0439	4.16846	1.1706	2.25105	5.27038e-60	5.03839e-59
Snai1	81.1316	23.4297	1.69487	3.23748	6.60236e-60	6.30748e-59
Phkb	17.4558	7.67863	1.08689	2.12416	1.17632e-59	1.12302e-58
Cnpy2	78.8913	32.1426	1.19781	2.29392	1.42067e-59	1.35539e-58
Ilvbl	10.1206	28.8492	-1.60982	0.32764	1.58562e-59	1.51174e-58
Mapkapk2	35.6188	66.6074	-1.00103	0.499644	1.60654e-59	1.53065e-58
Ppargc1b	0.189478	4.29153	-4.59116	0.0414881	1.64393e-59	1.56522e-58
Plcl1	0.00618108	0.610742	-6.58509	0.0104158	1.94084e-59	1.84667e-58
Dna2	2.52772	7.55059	-1.67691	0.312752	2.02923e-59	1.92947e-58
Ehd2	111.241	56.606	0.876933	1.83647	2.16619e-59	2.05832e-58
Marveld1	60.2377	28.3521	0.989552	1.98557	2.8782e-59	2.73303e-58
Ift80	23.0994	8.50252	1.34368	2.53799	3.38999e-59	3.21685e-58
Mdm2	15.5665	31.6029	-1.11908	0.460386	3.50705e-59	3.3257e-58
Unc45b	0	2.09413	-10.9936	0.000490463	4.15757e-59	3.93993e-58
Nck2	5.87772	14.4872	-1.39926	0.379122	4.21276e-59	3.98956e-58
Diras2	0.894779	0.00452748	7.27119	154.47	5.12332e-59	4.84863e-58
Slc45a3	0.827595	5.06212	-2.70991	0.152839	5.3488e-59	5.05865e-58
Zfp609	8.39554	15.6013	-0.992159	0.502725	5.37682e-59	5.08175e-58
Wrn	9.14526	3.0312	1.49486	2.81837	5.80083e-59	5.47882e-58
Stx5a	57.6662	20.976	1.36108	2.56878	5.84417e-59	5.51607e-58
Wwc2	30.1961	57.4658	-1.02633	0.490957	6.11088e-59	5.76396e-58
Znrf2	4.08821	12.561	-1.71542	0.304515	6.49032e-59	6.11777e-58
Cnih4	12.8886	25.0945	-1.05872	0.480058	7.33472e-59	6.9091e-58
Zfp605	3.55546	0.169816	4.27792	19.3992	7.51934e-59	7.07829e-58
Cad	27.6238	47.3957	-0.876627	0.544639	7.71812e-59	7.26057e-58
Stc2	10.6709	2.17657	2.1945	4.57729	7.98705e-59	7.50857e-58
Abcc3	1.13651	0.0557199	4.23439	18.8226	8.60957e-59	8.08842e-58
Klra22	3.20829	0.0400442	6.11345	69.2358	1.09376e-58	1.02687e-57
St3gal5	47.2905	22.1685	0.995082	1.99319	1.29321e-58	1.21331e-57
Nfat5	130.199	63.8458	0.93008	1.90538	1.52582e-58	1.43061e-57
Hmgn3	51.7231	17.3126	1.48059	2.79063	1.69103e-58	1.58446e-57
Slc30a1	1.574	5.55049	-1.9143	0.2653	1.76116e-58	1.64908e-57
Lmo7	18.206	4.61384	1.8821	3.68612	1.86384e-58	1.74407e-57
Armcx3	22.404	57.223	-1.45095	0.36578	1.99694e-58	1.86738e-57
Gbp2b	3.90147	0.152045	4.57365	23.8126	2.32414e-58	2.17191e-57
Emc9	0	4.51205	-9.96024	0.00100385	2.34951e-58	2.19417e-57
Spice1	6.37941	1.94349	1.61673	3.06679	3.55731e-58	3.31992e-57
Set	140.92	234.273	-0.831245	0.562044	3.74326e-58	3.49116e-57
Psd4	1.17814	0.0170724	5.95058	61.845	4.53837e-58	4.22993e-57
Mmp11	22.9239	9.00925	1.24975	2.37799	4.63967e-58	4.32149e-57
Ptprq	0.0433643	1.37069	-5.06412	0.0298915	4.90596e-58	4.56652e-57
Asphd2	2.27946	9.54106	-2.16166	0.2235	5.46119e-58	5.07998e-57
Ccdc157	6.42421	2.08065	1.52881	2.88547	5.83377e-58	5.42299e-57
Ankrd52	20.0385	34.3481	-0.875337	0.545126	5.95842e-58	5.53523e-57
Lrfn3	2.64616	0.0972005	4.64828	25.0769	5.96769e-58	5.54019e-57
Ccser2	32.7972	15.5025	0.982774	1.97626	6.95612e-58	6.45358e-57
Wdr46	27.0103	52.126	-1.04608	0.484281	7.19931e-58	6.67483e-57
Tcf4	10.7884	4.3827	1.20106	2.29909	7.71604e-58	7.14922e-57
Cacng7	11.7683	0.278087	5.28982	39.1197	7.85488e-58	7.2731e-57
Stambpl1	21.355	7.90087	1.33692	2.52612	8.25133e-58	7.63518e-57
Chaf1b	24.3256	49.889	-1.13439	0.455528	8.49101e-58	7.85182e-57
Mfap3l	0.628265	2.906	-2.30728	0.202041	9.20081e-58	8.50263e-57
Insr	6.69894	2.56713	1.2852	2.43716	9.74452e-58	8.9992e-57
Frmd7	0.00888681	0.818157	-6.51027	0.0109702	1.02388e-57	9.44948e-57
Ctla2b	0.204645	4.1403	-4.41559	0.0468569	1.24032e-57	1.14396e-56
Ppp2r5b	15.0094	29.6961	-1.08239	0.472247	1.26333e-57	1.16442e-56
Pbx3	9.57125	20.4008	-1.18984	0.43835	1.29028e-57	1.18849e-56
Sesn3	18.5806	5.74277	1.59547	3.02193	1.29687e-57	1.19378e-56
Ctdspl	11.0289	23.4901	-1.18852	0.438754	1.58536e-57	1.45839e-56
Ppp1r9a	0.620102	0.00517173	6.69593	103.676	1.60654e-57	1.47691e-56
Rps15a-ps4	3.91408	18.7025	-2.35139	0.195957	1.69067e-57	1.55324e-56
Lztr1	43.9689	22.0755	0.896047	1.86096	1.79012e-57	1.64354e-56
Rps15a-ps6	13.2738	0.569791	4.43812	21.6774	1.79237e-57	1.64453e-56
Ush1g	0	1.22536	-10.0627	0.000935015	1.79838e-57	1.64898e-56
Capg	121.245	34.6374	1.71015	3.27195	1.80527e-57	1.65423e-56
Herc3	0.18603	3.16366	-4.18411	0.0550119	2.25025e-57	2.06064e-56
Dbf4	31.4745	57.9541	-0.979014	0.507326	2.32013e-57	2.12326e-56
Dzip1l	11.7825	22.1513	-1.00846	0.497077	2.32282e-57	2.12435e-56
Dync1li1	30.5323	58.2044	-1.02868	0.490157	2.51795e-57	2.30131e-56
Chchd4	10.7461	32.0169	-1.67308	0.313583	2.92317e-57	2.66994e-56
Boc	21.1869	6.64221	1.57611	2.98165	4.49849e-57	4.10614e-56
Cpt2	17.1589	5.5697	1.52572	2.87931	4.53204e-57	4.1341e-56
Pacs2	7.23498	15.9887	-1.24167	0.422882	5.22781e-57	4.7657e-56
Zic4	1.02336	0.00735462	6.86577	116.628	7.36283e-57	6.70768e-56
Tmcc3	1.9749	0.278999	2.72126	6.59447	8.83816e-57	8.04653e-56
Nceh1	7.31512	18.1502	-1.40879	0.376628	9.06936e-57	8.25171e-56
Eif2s2	104.79	176.075	-0.846654	0.556073	9.40272e-57	8.54952e-56
Rgs3	7.66654	2.55575	1.48663	2.80233	9.75192e-57	8.86134e-56
Pmvk	47.4685	15.5354	1.51315	2.85432	9.9329e-57	9.02e-56
Nfkb2	70.7011	35.178	0.909424	1.8783	1.00333e-56	9.10531e-56
Foxn2	8.13321	16.122	-1.08511	0.471358	1.02941e-56	9.336e-56
Tmem59	135.652	69.6848	0.863278	1.81917	1.16833e-56	1.05891e-55
Crls1	17.4463	39.725	-1.2848	0.410428	1.71093e-56	1.5497e-55
Usp12	11.1866	20.6745	-0.98416	0.50552	1.83009e-56	1.65658e-55
Chd3os	3.15711	0.15611	4.21716	18.5991	2.32987e-56	2.10761e-55
Tmem173	4.79586	12.6791	-1.50022	0.3535	2.3424e-56	2.1176e-55
Nfix	60.0578	27.2717	1.04078	2.05734	2.36434e-56	2.13607e-55
Satb2	4.3149	1.13286	1.83125	3.55845	2.699e-56	2.43686e-55
Saysd1	2.24537	0.103553	4.31806	19.9465	2.84239e-56	2.56468e-55
Mapk8ip1	8.75406	21.3155	-1.38165	0.383778	2.88779e-56	2.60398e-55
Pno1	38.2326	81.3863	-1.18811	0.438877	3.19244e-56	2.87686e-55
Hunk	0.3466	2.06269	-2.67012	0.157114	3.4454e-56	3.10283e-55
Kctd12b	1.5415	0.0457028	4.95375	30.9903	3.98601e-56	3.58741e-55
Adcy7	1.97934	6.34921	-1.7787	0.291445	4.12266e-56	3.70804e-55
Cxx1c	5.77815	0.262538	4.34759	20.359	4.13909e-56	3.72044e-55
Wdr45	17.3538	4.94544	1.71296	3.27832	4.3384e-56	3.89712e-55
Sh3rf3	3.27941	8.17606	-1.41559	0.374857	4.38807e-56	3.93923e-55
Psph	14.2197	48.0032	-1.85319	0.276779	4.88223e-56	4.38006e-55
Pskh1	17.7369	6.64757	1.31794	2.49309	4.9292e-56	4.41941e-55
Mlh3	4.43656	0.616481	2.74725	6.71435	5.19104e-56	4.65121e-55
Cyb5r3	407.529	180.155	1.07966	2.11353	5.46241e-56	4.89126e-55
Itpripl2	33.4892	15.8999	0.976378	1.96752	5.50524e-56	4.9265e-55
Ncoa4	26.699	45.2512	-0.858909	0.551369	5.54546e-56	4.95935e-55
B230217C12Rik	9.61093	1.32294	2.76026	6.7752	5.98638e-56	5.35028e-55
Emp3	66.3324	26.3471	1.23412	2.35238	6.32794e-56	5.65197e-55
Slc25a13	11.8537	24.6839	-1.1557	0.448849	6.63421e-56	5.92179e-55
Wbscr27	3.944	0.298932	3.62026	12.2972	8.43151e-56	7.52133e-55
Mprip	45.7887	75.0334	-0.810334	0.57025	9.91308e-56	8.83739e-55
Ddx27	30.8668	52.9834	-0.877278	0.544393	1.17883e-55	1.05025e-54
Nfatc1	6.26404	1.82873	1.6779	3.19963	1.24458e-55	1.10813e-54
Cycs	37.4849	64.235	-0.874745	0.54535	1.3682e-55	1.21743e-54
Irx2	3.76581	0.355618	3.30028	9.8511	1.50993e-55	1.3427e-54
Tet1	0.318142	0.00782391	5.21024	37.0201	1.58973e-55	1.41277e-54
Dmpk	2.95747	10.6285	-1.94237	0.260189	1.66853e-55	1.48187e-54
Gpr85	2.39686	0.151997	3.87157	14.6372	1.7839e-55	1.58333e-54
Cldn15	0.180598	4.61593	-4.75102	0.0371366	2.61247e-55	2.3173e-54
Itga2b	2.72632	0.362541	2.81069	7.0162	3.03441e-55	2.68987e-54
Madd	1.31336	3.8106	-1.63384	0.322229	3.30564e-55	2.92848e-54
Cstf2	18.8426	32.0789	-0.865284	0.548938	3.78981e-55	3.3553e-54
Rgs2	2.40862	0.0627661	5.13344	35.1011	4.10867e-55	3.63532e-54
Tldc1	11.0538	3.68185	1.48742	2.80387	4.34061e-55	3.83815e-54
Asap2	4.08291	9.96156	-1.38452	0.383016	4.41843e-55	3.90451e-54
Nfkbiz	57.698	20.8782	1.36902	2.58295	4.8687e-55	4.29972e-54
Ell	22.3499	9.82777	1.0871	2.12446	5.16787e-55	4.56108e-54
Pde4a	7.48876	2.41383	1.5356	2.89909	5.5749e-55	4.91725e-54
Kcmf1	19.8494	38.6137	-1.05745	0.48048	5.63875e-55	4.97046e-54
Cd59a	0.0823212	2.77603	-5.14557	0.0282508	5.6505e-55	4.97772e-54
Klhl9	21.8441	10.0677	1.01988	2.02775	5.86334e-55	5.162e-54
Shc2	1.66841	0.0579109	4.72891	26.5182	8.73336e-55	7.68395e-54
Rnf11	64.2653	31.1608	0.946293	1.92691	9.62385e-55	8.46216e-54
B4galt5	18.4607	31.9269	-0.888134	0.540312	1.04352e-54	9.16987e-54
Epas1	1.92542	5.84717	-1.69965	0.30786	1.09303e-54	9.59896e-54
Cmah	2.56216	5.56152	-1.21617	0.430423	1.21335e-54	1.0649e-53
Eid2	5.62219	0.10807	5.56286	47.2701	1.21465e-54	1.06538e-53
Prnd	2.34055	0.24115	3.17432	9.02749	1.33409e-54	1.16941e-53
Eif4e3	1.87277	0.079318	4.43987	21.7037	1.33846e-54	1.17252e-53
Ndst3	0.97826	0.0368252	4.61146	24.4449	1.39532e-54	1.22157e-53
Tcf7	2.30207	0.079897	4.72031	26.3605	1.45369e-54	1.27189e-53
Islr	8.21996	1.77392	2.11298	4.32584	1.46101e-54	1.2775e-53
Synpr	0.0236883	1.41679	-5.89567	0.0167967	1.46311e-54	1.27855e-53
Tmem8b	1.49698	0.148061	3.23282	9.40101	1.54182e-54	1.34649e-53
Cab39	20.0495	35.4715	-0.921051	0.528124	1.67478e-54	1.46171e-53
Plce1	2.53053	6.93597	-1.55259	0.340898	1.70876e-54	1.49044e-53
Arl4d	1.45358	14.2272	-3.3875	0.0955567	1.9106e-54	1.66547e-53
Plekhm3	4.08639	1.36918	1.47974	2.78899	2.16657e-54	1.88744e-53
Arl4a	1.68311	0.164529	3.24958	9.51089	2.73013e-54	2.37693e-53
Peg10	39.7287	11.9983	1.62901	3.093	2.9319e-54	2.55102e-53
Fgf2	0.411421	6.52124	-4.06825	0.059612	3.3986e-54	2.95528e-53
Cdk5rap2	14.7524	6.91901	0.994301	1.99211	3.70355e-54	3.21847e-53
Gata3	1.55152	5.63841	-1.95743	0.257488	3.86498e-54	3.35669e-53
Pnrc1	34.2912	7.92218	2.01552	4.04326	3.87463e-54	3.363e-53
Creld1	4.3598	0.597275	2.76603	6.80235	4.35128e-54	3.7744e-53
Zfp775	1.93041	0.0783001	4.51331	22.8371	5.52548e-54	4.78999e-53
Dok1	8.63204	25.1595	-1.64043	0.32076	7.81372e-54	6.7695e-53
Mrpl15	17.9162	35.9868	-1.10373	0.465313	8.19395e-54	7.09457e-53
Zmat3	5.77107	15.3574	-1.50993	0.351129	8.34591e-54	7.22171e-53
Adamts5	25.942	66.8576	-1.46395	0.3625	9.10728e-54	7.87571e-53
Spg7	31.2304	14.5484	1.00442	2.00614	9.94135e-54	8.59173e-53
Ubl4	8.58906	21.1229	-1.39579	0.380035	1.01692e-53	8.78326e-53
Atp6v1b2	41.0115	71.0225	-0.890165	0.539552	1.07056e-53	9.24094e-53
Zfp951	3.94957	0.628351	2.55282	5.86779	1.09278e-53	9.42701e-53
Abracl	77.8015	140.939	-0.954742	0.515934	1.22745e-53	1.05822e-52
Bckdha	15.6247	4.80825	1.60213	3.03591	1.29173e-53	1.11296e-52
Zfp598	17.7166	31.5983	-0.932239	0.524044	1.31672e-53	1.1338e-52
Pmaip1	0.352384	3.02235	-3.19049	0.109539	1.39147e-53	1.19744e-52
Bst2	8.7143	36.9076	-2.1799	0.220691	1.40479e-53	1.20817e-52
Ak2	77.6191	143.153	-0.980793	0.506701	1.58505e-53	1.36238e-52
Ppp1r26	2.51107	0.269835	3.11738	8.67813	1.69123e-53	1.45275e-52
AI662270	2.46126	0	9.79438	887.977	1.95245e-53	1.67612e-52
Aven	12.0209	30.2571	-1.42948	0.371264	1.99971e-53	1.71565e-52
Cmtm3	67.6758	30.4667	1.05376	2.07593	2.0271e-53	1.7381e-52
Atp13a2	7.32554	2.58887	1.40232	2.64326	2.19225e-53	1.87856e-52
Zfpm2	10.9888	20.7607	-1.01617	0.494426	2.57681e-53	2.20675e-52
Gnb4	10.758	1.16464	3.1099	8.63325	3.05094e-53	2.61121e-52
Gtf2f1	56.2548	95.4845	-0.861028	0.55056	3.05353e-53	2.61184e-52
Ogfrl1	1.51107	0.150272	3.22702	9.36329	3.05641e-53	2.61273e-52
Gng10	98.1171	48.4101	0.921351	1.89389	3.68499e-53	3.14816e-52
6430706D22Rik	6.216	13.7873	-1.24668	0.421417	4.1665e-53	3.55738e-52
Sox5	1.11803	0.130924	2.99162	7.95369	4.51382e-53	3.85159e-52
Elk1	13.0587	5.24432	1.21782	2.32594	4.73142e-53	4.03483e-52
Timm17a	48.089	97.8721	-1.12294	0.459159	5.01112e-53	4.27078e-52
Gprc5b	11.9101	26.3465	-1.24358	0.422322	5.12779e-53	4.36758e-52
Gmds	33.4964	13.5367	1.20922	2.31213	5.4223e-53	4.61565e-52
Zbtb8b	0.0468493	1.42676	-5.00112	0.0312258	5.71452e-53	4.86147e-52
Hivep3	2.06332	4.98808	-1.37092	0.386643	5.84101e-53	4.96609e-52
Lhfpl2	29.9281	13.755	1.02383	2.03331	6.06546e-53	5.15381e-52
Mrpl18	66.0752	122.013	-0.982529	0.506092	6.75326e-53	5.7348e-52
Clec2d	6.12997	0.598449	3.25136	9.52266	9.01813e-53	7.6535e-52
Lfng	3.69796	12.5932	-1.86403	0.274707	1.17144e-52	9.93582e-52
Jag1	2.52221	8.06766	-1.77608	0.291976	1.41316e-52	1.19788e-51
Ppif	16.129	34.8683	-1.20979	0.432333	1.46664e-52	1.24247e-51
Rbm28	22.4381	60.6178	-1.5318	0.345845	1.61684e-52	1.3689e-51
Cemip	92.1354	38.9201	1.14523	2.21181	1.69748e-52	1.43631e-51
Pygo1	3.63662	0.284596	3.56533	11.8378	1.96375e-52	1.66061e-51
Asic1	3.18342	9.28373	-1.64127	0.320574	2.02162e-52	1.70853e-51
Phlda3	30.0727	56.7188	-1.01272	0.495611	2.04388e-52	1.72631e-51
Syngr1	0.173885	3.73961	-4.52355	0.0434785	2.16368e-52	1.8264e-51
Slco1a6	1.21838	0.01429	6.19897	73.4641	2.33001e-52	1.96564e-51
Tmem53	6.3708	0.199038	4.87564	29.3571	2.43311e-52	2.05138e-51
Zfp358	18.8196	6.69912	1.39236	2.62507	2.45868e-52	2.07171e-51
Pmp22	82.8256	38.9531	0.990499	1.98687	2.47192e-52	2.08162e-51
Slc38a2	166.491	84.6007	0.879032	1.83914	2.66237e-52	2.24067e-51
Eln	0.0189936	0.999859	-5.75014	0.0185796	2.67607e-52	2.25086e-51
Samd11	0.651678	4.389	-2.84542	0.139137	3.07173e-52	2.58211e-51
Dars	35.6502	61.8408	-0.8924	0.538717	3.19047e-52	2.68034e-51
Slc25a32	8.34531	17.4408	-1.16149	0.447052	3.26181e-52	2.73864e-51
Ndrg2	1.53077	6.81161	-2.25179	0.209964	3.3654e-52	2.82394e-51
Ptms	213.25	113.576	0.811152	1.75461	4.26669e-52	3.5781e-51
Tg	0.0461666	0.702968	-4.01996	0.0616414	4.94445e-52	4.14402e-51
Wdr12	10.7776	24.263	-1.26907	0.414927	5.75311e-52	4.81891e-51
Ttll4	7.31678	16.3565	-1.25903	0.417823	7.11375e-52	5.95508e-51
Fkbp5	7.52944	15.7706	-1.16511	0.44593	7.49132e-52	6.26744e-51
Pik3c2b	0.603917	0.0351341	3.98698	15.8563	8.12186e-52	6.79095e-51
Gm20554	0.801548	0.0118036	5.91349	60.2751	9.76181e-52	8.15735e-51
Ypel3	23.6301	1.34158	4.04048	16.4553	1.0033e-51	8.37897e-51
Serpinb6a	221.632	99.0471	1.06445	2.09138	1.11021e-51	9.2664e-51
Kpna3	32.5051	56.966	-0.90712	0.533248	1.11755e-51	9.32218e-51
Wdr1	89.0773	147.448	-0.825018	0.564475	1.20885e-51	1.00778e-50
Il7	1.89777	0.0525455	5.04274	32.9622	1.24338e-51	1.03595e-50
Srebf2	97.3237	51.2132	0.828424	1.77574	1.30147e-51	1.08371e-50
Akap8	28.6153	49.5084	-0.888641	0.540123	1.64003e-51	1.36483e-50
Pold4	34.9331	11.8282	1.46418	2.75907	1.77651e-51	1.47753e-50
Efr3b	0.606136	0.00906949	5.87285	58.601	2.08e-51	1.72893e-50
Prdx2	429.957	224.58	0.839391	1.78929	2.4432e-51	2.02964e-50
Tmem67	4.94393	1.19705	1.94708	3.85593	2.51979e-51	2.09203e-50
Mvk	49.2184	23.181	0.988124	1.9836	2.68133e-51	2.22485e-50
Gfod1	1.83592	5.2324	-1.6095	0.327712	3.07847e-51	2.55287e-50
Hmga2-ps1	9.4089	1.91067	2.20024	4.59555	3.13895e-51	2.6015e-50
Klf8	1.12288	0.0222827	5.50382	45.3749	3.69611e-51	3.06147e-50
Sema7a	2.15906	0.112667	4.14979	17.7506	3.83007e-51	3.17057e-50
Nars	80.8409	136.994	-0.858937	0.551358	4.18309e-51	3.46078e-50
Golm1	15.3163	27.3146	-0.932603	0.523912	4.23828e-51	3.50439e-50
Pik3r1	19.3753	8.92075	1.02057	2.02872	4.3607e-51	3.6035e-50
Ephb3	8.1744	15.934	-1.0605	0.479465	4.76854e-51	3.93823e-50
Il34	6.35442	0.862751	2.78123	6.87437	5.25721e-51	4.33927e-50
Hes1	3.18069	13.8897	-2.22277	0.214229	5.55488e-51	4.58229e-50
Ifitm1	6.62018	0.103037	5.83566	57.1095	6.17315e-51	5.08934e-50
Cmip	21.1251	9.65195	1.03238	2.0454	6.34114e-51	5.22479e-50
Ptpn13	13.5095	4.23109	1.57677	2.98302	8.4184e-51	6.93231e-50
Dennd1b	1.58608	4.13668	-1.4811	0.358217	8.6396e-51	7.11032e-50
Rin3	3.04295	0.421547	2.75071	6.7305	9.18618e-51	7.55575e-50
Cyc1	89.9908	151.091	-0.845515	0.556512	9.88031e-51	8.12196e-50
Vapb	16.7129	27.2748	-0.80427	0.572652	1.00308e-50	8.24091e-50
Chst15	2.09836	0.1723	3.49819	11.2995	1.10819e-50	9.09911e-50
C3	258.091	72.5297	1.73309	3.32439	1.22913e-50	1.00863e-49
Pcdhb20	3.30093	0.18831	4.03025	16.3391	1.47316e-50	1.20818e-49
Sdcbp	100.699	52.4544	0.84308	1.79388	1.65236e-50	1.35436e-49
Acot1	4.70673	13.4065	-1.60702	0.328277	1.77921e-50	1.45749e-49
Cped1	1.58811	0.197311	2.90742	7.50277	1.86594e-50	1.52765e-49
Hoxd3	0.133816	2.06039	-4.03264	0.0611019	2.03494e-50	1.66505e-49
Adamts4	2.64812	0.482669	2.35553	5.11782	2.09657e-50	1.71448e-49
Bace1	10.638	21.7061	-1.12652	0.45802	2.2154e-50	1.81061e-49
Gas7	5.63456	1.84905	1.50935	2.84681	2.30781e-50	1.88505e-49
Zbtb18	1.90313	5.42932	-1.61013	0.327568	2.78259e-50	2.27154e-49
Plxnb3	0	0.531924	-9.7793	0.00113799	2.9159e-50	2.37899e-49
Rassf6	8.51257	2.00964	1.98424	3.95654	3.00575e-50	2.45089e-49
Tnnt2	4.09375	17.2142	-2.16888	0.222383	3.43282e-50	2.7975e-49
Ppm1g	74.9052	123.223	-0.815936	0.56804	4.08204e-50	3.32465e-49
Atg3	21.3236	40.6819	-1.02975	0.489794	4.58188e-50	3.7296e-49
Pop4	14.8043	34.4116	-1.31416	0.40216	4.65329e-50	3.78555e-49
Gstt3	8.8832	2.23183	1.89374	3.71597	4.94447e-50	4.02012e-49
Nop56	123.554	215.008	-0.897128	0.536954	5.04976e-50	4.10337e-49
Slco5a1	0.0648885	0.63556	-3.38459	0.0957499	5.1208e-50	4.15871e-49
Ddx39	66.8782	116.902	-0.903375	0.534634	5.72998e-50	4.65076e-49
1110007C09Rik	27.2131	64.3596	-1.33967	0.395112	6.28091e-50	5.09499e-49
Ltbp4	17.0074	6.21083	1.35497	2.55792	7.00686e-50	5.67776e-49
Krt7	1.96245	10.2047	-2.4764	0.179692	7.00735e-50	5.67776e-49
Rbpms2	4.23978	12.1036	-1.61132	0.327299	7.43747e-50	6.02282e-49
Morn4	11.1868	2.11904	2.30274	4.93394	7.53239e-50	6.09619e-49
Nop2	41.6165	73.442	-0.917048	0.529591	7.90628e-50	6.39513e-49
Nipal1	2.20944	0.229375	3.16282	8.95577	8.18658e-50	6.61807e-49
Map2k6	3.77835	0.448911	2.97081	7.83979	8.90726e-50	7.19655e-49
Kmt2c	2.42554	4.34551	-0.939008	0.521591	9.16597e-50	7.40135e-49
Axin1	19.31	35.0729	-0.959265	0.514319	9.79725e-50	7.90658e-49
Nabp1	10.3404	3.10393	1.63791	3.11215	1.0111e-49	8.15511e-49
Eif2s3x	80.1891	126.81	-0.759017	0.590899	1.11323e-49	8.97373e-49
D330045A20Rik	0.345861	3.30459	-3.34977	0.0980884	1.20431e-49	9.70243e-49
Spast	9.19968	16.9174	-0.976714	0.508136	1.21421e-49	9.77662e-49
Trim12c	2.04808	0.183998	3.3722	10.3546	1.24352e-49	1.00069e-48
Flrt3	2.8971	0.388481	2.79733	6.95152	1.26467e-49	1.01713e-48
Hoxa2	5.77199	0.752382	2.83896	7.15505	1.52418e-49	1.22515e-48
Mthfd2	37.1987	68.6021	-0.981106	0.506591	1.66379e-49	1.33661e-48
Pcdh18	39.3904	8.80178	2.06456	4.18307	1.70092e-49	1.36566e-48
Adamts2	9.3894	4.16874	1.07388	2.10508	1.97739e-49	1.58674e-48
5033428I22Rik	0.0104579	2.80321	-7.66436	0.00492945	2.00802e-49	1.6104e-48
Sestd1	13.9102	7.0733	0.878041	1.83788	2.18469e-49	1.7511e-48
Cdk20	7.05613	1.44926	2.18437	4.54527	2.49064e-49	1.99519e-48
Yaf2	16.4182	29.6971	-0.952851	0.516611	2.60918e-49	2.08897e-48
Gorab	19.6908	8.76777	1.06936	2.0985	2.69089e-49	2.15317e-48
Mgarp	2.71363	0.00800223	7.84126	229.326	3.20968e-49	2.56684e-48
Dyrk1b	6.4559	1.26197	2.25442	4.77142	3.65367e-49	2.92025e-48
Myl12a	393.923	667.728	-0.859183	0.551265	3.76555e-49	3.00797e-48
Tex30	11.8741	26.1961	-1.23945	0.423533	4.11875e-49	3.28826e-48
Ppp3r1	45.3914	77.9757	-0.87867	0.543869	5.04795e-49	4.02782e-48
Prickle2	1.39999	3.60955	-1.46439	0.36239	5.05261e-49	4.02926e-48
Vars	63.8349	101.143	-0.761825	0.58975	5.68703e-49	4.53263e-48
Birc3	11.0694	4.0848	1.33978	2.53113	6.60115e-49	5.25823e-48
Mdh2	217.112	341.42	-0.750866	0.594247	7.02002e-49	5.58874e-48
Fam193b	11.8201	4.65454	1.24714	2.3737	7.10086e-49	5.64992e-48
Rgs16	0.321903	4.30409	-3.82788	0.0704194	7.36554e-49	5.85722e-48
Metrnl	12.7228	26.0452	-1.13155	0.456425	7.77795e-49	6.1817e-48
Ugt1a2	4.48689	19.9315	-2.24994	0.210233	8.35274e-49	6.6348e-48
Arih1	20.6885	33.3006	-0.784673	0.580483	8.66913e-49	6.88224e-48
Nup35	15.9353	29.2729	-0.975231	0.508658	9.52246e-49	7.55544e-48
Orc2	11.9999	23.4961	-1.06734	0.477197	1.08738e-48	8.62277e-48
Abi2	6.63512	13.897	-1.16507	0.445943	1.17921e-48	9.34574e-48
Adcy3	7.95209	2.92922	1.34331	2.53733	1.1817e-48	9.36023e-48
Ankrd55	10.832	1.44496	2.80502	6.98869	1.21641e-48	9.62977e-48
Arhgap5	17.4403	32.366	-0.99021	0.503404	1.52446e-48	1.20617e-47
Hnrnph3	15.4992	4.93557	1.553	2.93426	1.63611e-48	1.29379e-47
Mcm2	56.0643	96.3767	-0.879587	0.543523	1.75061e-48	1.38356e-47
Ei24	24.6974	42.386	-0.877229	0.544412	1.78448e-48	1.40954e-47
Scrn1	8.02724	22.6845	-1.59657	0.330662	2.0578e-48	1.62452e-47
Car11	2.36444	0.0485931	5.43996	43.4101	2.12892e-48	1.67973e-47
Hnrnpab	217.305	348.108	-0.7777	0.583296	2.17301e-48	1.71356e-47
Wwtr1	36.7053	58.9566	-0.781715	0.581675	2.22655e-48	1.7548e-47
Palm3	0.0412192	1.54182	-5.25701	0.0261507	2.23045e-48	1.7569e-47
Dtwd1	24.4614	8.64338	1.40338	2.64521	2.37036e-48	1.86607e-47
Ly6c2	7.5373	0.533451	3.70867	13.0743	2.46449e-48	1.93909e-47
Egln3	1.30255	5.92442	-2.28197	0.205617	2.65354e-48	2.08667e-47
Asph	27.5707	13.9966	0.879949	1.84031	2.69617e-48	2.11902e-47
Ttc12	2.566	0.233628	3.35553	10.2356	2.87195e-48	2.25591e-47
Insig1	58.6359	26.9259	1.02515	2.03518	3.13188e-48	2.45872e-47
Fam26e	3.75914	0.172437	4.33068	20.1217	3.19714e-48	2.50856e-47
Nfe2l1	91.0797	44.4863	0.935697	1.91282	3.27543e-48	2.56857e-47
Map1lc3a	35.1398	13.3583	1.29751	2.45804	3.30242e-48	2.5883e-47
Cc2d1a	30.3099	15.4598	0.873623	1.83226	3.46992e-48	2.71807e-47
Creb3l2	14.575	27.6765	-1.02301	0.492088	3.4917e-48	2.73362e-47
Rpl34-ps1	890.898	472.043	0.818782	1.76392	6.23484e-48	4.8785e-47
Hdx	0	0.620032	-9.4501	0.00142967	6.70287e-48	5.24181e-47
Tagln2	254.053	427.265	-0.847747	0.555652	7.12441e-48	5.56838e-47
Glis2	18.9564	35.6642	-1.00995	0.496565	7.19808e-48	5.62285e-47
Arl8a	26.096	53.3504	-1.12968	0.457017	8.01852e-48	6.26029e-47
Rbms1	50.3682	87.6309	-0.897091	0.536969	8.46725e-48	6.60698e-47
Gga2	8.61477	16.7354	-1.05566	0.481076	8.66776e-48	6.75971e-47
Stk36	1.6183	0.228558	2.72403	6.60714	8.71456e-48	6.79246e-47
Bdh1	1.51038	0.0511607	4.75535	27.0086	8.79343e-48	6.85015e-47
Ing5	4.41818	9.16358	-1.15002	0.450619	9.19399e-48	7.15825e-47
Ptch1	7.8072	2.82128	1.37051	2.58562	9.39071e-48	7.30739e-47
Nkx3-2	3.76844	0	10.4389	1388.14	1.03686e-47	8.06386e-47
Cxcl10	3.87832	0.127075	4.80181	27.8926	1.10921e-47	8.62182e-47
Neurl1b	0.410648	2.26153	-2.55508	0.170155	1.16135e-47	9.02215e-47
Uchl5	17.747	32.9035	-0.988662	0.503945	1.20504e-47	9.35645e-47
Zfp185	0.498611	5.55337	-3.57334	0.0840075	1.36675e-47	1.06062e-46
Ptpre	3.10534	0.725046	2.00013	4.00036	1.42909e-47	1.10839e-46
Tspan5	14.12	26.936	-1.02957	0.489856	1.50039e-47	1.16305e-46
H1fx	7.66851	0.704547	3.34271	10.1451	1.5367e-47	1.19054e-46
Tmem223	3.82107	16.7031	-2.22601	0.213749	1.57269e-47	1.21776e-46
Has2	33.6602	4.39196	2.84096	7.16495	1.62488e-47	1.25748e-46
Gnpat	40.3427	21.2468	0.827021	1.77402	1.83115e-47	1.41631e-46
Ahcyl2	4.13284	9.13879	-1.24192	0.42281	1.83212e-47	1.41631e-46
Smad1	15.2672	5.83306	1.2904	2.44596	1.88647e-47	1.45753e-46
Isoc2b	3.35117	0.018484	7.1479	141.819	2.12797e-47	1.64322e-46
Trp53inp2	17.8878	7.22984	1.20884	2.31151	2.1834e-47	1.6851e-46
Fyn	14.0233	6.09493	1.1039	2.14935	2.19684e-47	1.69455e-46
1110037F02Rik	20.8358	10.1457	0.939867	1.91835	2.71538e-47	2.09339e-46
Prph	0.153922	2.49308	-4.10458	0.0581296	2.82907e-47	2.17985e-46
Trpv2	1.32268	0.039699	4.91055	30.0762	2.85847e-47	2.2013e-46
Tram1l1	1.19117	0	9.40741	679.067	2.97696e-47	2.2913e-46
Slc12a8	0.38153	2.96647	-3.05688	0.120168	3.02414e-47	2.32635e-46
Map2k1	33.657	60.069	-0.933488	0.523591	3.42837e-47	2.63587e-46
Pnkd	29.4943	62.294	-1.17572	0.442661	3.50224e-47	2.6912e-46
Phactr1	1.58931	0.118433	3.64085	12.4739	3.61232e-47	2.77428e-46
Hdac5	30.0165	13.286	1.07783	2.11086	3.64931e-47	2.80117e-46
Traf4	9.36105	19.8896	-1.18447	0.439986	3.74868e-47	2.87588e-46
Pard3b	0.507407	0.0309107	3.92301	15.1686	4.11292e-47	3.15361e-46
Wdr4	8.53528	15.699	-0.976825	0.508097	4.1344e-47	3.16836e-46
Epha1	0.468455	2.99309	-2.77333	0.146266	4.19904e-47	3.21615e-46
Stat2	8.73242	2.30953	1.82089	3.53299	4.23225e-47	3.23984e-46
Vps25	79.8306	31.0138	1.26647	2.40572	4.87271e-47	3.7281e-46
H2-DMb1	1.93838	15.1064	-3.06199	0.119743	4.91369e-47	3.75742e-46
Smim20	5.66654	17.1518	-1.69558	0.30873	6.23885e-47	4.76817e-46
Rheb	47.3427	81.0546	-0.873605	0.545781	6.44446e-47	4.92265e-46
Sox8	0.0884374	1.34184	-4.00243	0.062395	6.56918e-47	5.0152e-46
Shmt1	15.181	30.8652	-1.12194	0.459475	6.63876e-47	5.06559e-46
Gucy1a2	0.699691	1.81385	-1.47253	0.360351	6.73859e-47	5.139e-46
Ago4	0.476413	0.00306808	6.94652	123.342	6.79381e-47	5.17831e-46
9030617O03Rik	0.973167	4.25738	-2.22385	0.214069	7.20983e-47	5.49244e-46
D030028A08Rik	0.671803	3.56527	-2.50248	0.176473	7.25468e-47	5.52364e-46
Pdlim4	3.02219	0.0585964	5.51447	45.7109	7.54862e-47	5.74435e-46
Rcn3	148.66	74.2229	0.904404	1.87177	9.14084e-47	6.95225e-46
Ndfip2	14.9714	29.0599	-1.05453	0.481455	9.34426e-47	7.10315e-46
Tspyl4	4.51427	1.06186	1.98885	3.96922	9.37061e-47	7.11935e-46
Gria1	0.82331	0.00934866	6.27168	77.2616	1.00764e-46	7.65144e-46
Ranbp17	1.29086	0.0757741	3.98023	15.7822	1.05764e-46	8.02681e-46
2210016F16Rik	4.10651	0.444957	3.10541	8.60642	1.05934e-46	8.03543e-46
Bcor	8.40707	3.20978	1.29134	2.44755	1.11946e-46	8.48685e-46
Rasl10b	0.0437477	1.04988	-4.64243	0.0400396	1.1483e-46	8.70088e-46
Nudt7	0.226215	5.70826	-4.73904	0.037446	1.39524e-46	1.05663e-45
Mast2	17.0054	29.6141	-0.898094	0.536595	1.45498e-46	1.10128e-45
Dcbld2	26.248	43.1694	-0.815804	0.568092	1.53776e-46	1.16332e-45
Naa50	45.8539	77.8676	-0.861987	0.550194	1.551e-46	1.17271e-45
Dhrs7	12.0668	3.14449	1.84096	3.58249	1.94954e-46	1.47325e-45
Cyp2s1	0.070258	2.39275	-5.16377	0.0278966	1.95072e-46	1.47335e-45
Mylk3	0.0465802	1.53844	-5.10831	0.0289898	1.97564e-46	1.49138e-45
Camkk2	13.6845	5.79044	1.14282	2.20813	1.98906e-46	1.50071e-45
Rab11fip2	4.53732	9.04432	-1.09349	0.468628	2.015e-46	1.51947e-45
Abcd2	0.776549	0.0251785	4.81329	28.1154	2.06186e-46	1.55398e-45
Fam180a	0.586026	11.5218	-4.38865	0.0477401	2.90576e-46	2.18884e-45
Rab15	2.03385	0.0953784	4.29782	19.6685	3.30994e-46	2.49198e-45
Pak4	11.9208	21.6732	-0.960399	0.513915	3.63076e-46	2.73206e-45
Tpcn1	7.97617	14.1073	-0.92049	0.528329	3.9844e-46	2.99657e-45
Gclm	20.0336	39.7858	-1.08775	0.470495	4.00371e-46	3.008e-45
Pfdn6	49.9961	89.6548	-0.940579	0.521024	4.00385e-46	3.008e-45
Fcgrt	16.4035	4.8586	1.65788	3.15553	4.25688e-46	3.19639e-45
Whsc1	21.8533	35.1556	-0.783963	0.580769	4.45041e-46	3.33993e-45
Efna2	1.39594	5.32719	-2.02818	0.245165	4.82031e-46	3.61562e-45
Slc35a2	19.2215	7.38236	1.283	2.43345	5.21812e-46	3.91193e-45
Lurap1l	16.8303	5.92726	1.40788	2.65346	5.5334e-46	4.14609e-45
Nim1k	0.939875	0.046129	4.22447	18.6935	5.71302e-46	4.27841e-45
Slfn8	0.676237	0	9.44081	694.97	6.99322e-46	5.23437e-45
Btg2	5.35144	18.8849	-1.91595	0.264998	8.15231e-46	6.0987e-45
Prss22	3.24735	0.0676561	5.4289	43.0786	8.55318e-46	6.39521e-45
Lrrcc1	9.97395	3.88742	1.2616	2.39761	1.03765e-45	7.75437e-45
Lrrc45	20.0083	8.28083	1.17506	2.25803	1.08742e-45	8.12203e-45
Phb2	142.578	228.403	-0.777569	0.583349	1.15274e-45	8.60536e-45
Ankrd13d	2.59911	0.260017	3.213	9.27276	1.20635e-45	9.00081e-45
Rab11fip5	23.9816	11.6115	0.948154	1.9294	1.28423e-45	9.57687e-45
2410006H16Rik	130.219	55.0848	1.14362	2.20934	1.41087e-45	1.05157e-44
Actn1	105.839	171.213	-0.791689	0.577667	1.46411e-45	1.09067e-44
Dhrs1	41.7072	17.9398	1.1193	2.17241	1.75555e-45	1.30709e-44
Mogat2	0.0344933	1.8816	-5.77939	0.0182066	1.76108e-45	1.31052e-44
Aox3	0	0.76867	-9.84288	0.00108893	1.82607e-45	1.35817e-44
Hn1l	67.1588	105.232	-0.745861	0.596312	1.90388e-45	1.4153e-44
Hipk3	13.2401	23.7463	-0.941092	0.520838	1.97298e-45	1.4659e-44
Hspb11	28.8368	7.6921	1.80701	3.49917	2.0768e-45	1.54222e-44
Gm8267	3.28171	0.176663	4.09441	17.082	2.47424e-45	1.83639e-44
Xiap	21.1886	11.0097	0.846585	1.79824	2.65132e-45	1.96679e-44
Apol6	1.30995	0	9.41826	684.195	2.66417e-45	1.97528e-44
Kif3a	12.0243	4.50389	1.31841	2.49392	2.83004e-45	2.09716e-44
Dnajc2	31.5081	57.2345	-0.958586	0.514561	3.06752e-45	2.27196e-44
Megf8	16.5631	8.10316	0.933205	1.90951	3.20103e-45	2.3696e-44
Cited1	4.83161	0.0998672	5.45125	43.7511	3.67835e-45	2.72151e-44
Mlec	89.1677	46.8555	0.830489	1.77829	3.82611e-45	2.82936e-44
Exoc5	17.4059	29.5476	-0.861395	0.55042	4.65344e-45	3.43936e-44
Pkp2	6.63539	14.6336	-1.23909	0.423641	4.86448e-45	3.59346e-44
Ifrd1	47.5759	90.1814	-1.02075	0.492859	5.10384e-45	3.76832e-44
Zmynd19	21.1363	44.5094	-1.17135	0.444006	5.14463e-45	3.79645e-44
Ispd	0.893751	0.0122043	5.9558	62.0688	5.21708e-45	3.8479e-44
Dusp3	9.89497	19.8905	-1.10582	0.46464	5.568e-45	4.10458e-44
Tspan14	25.9203	11.1287	1.12186	2.17627	5.77373e-45	4.25402e-44
Dlg1	26.8016	46.829	-0.903403	0.534624	6.04307e-45	4.45016e-44
Sord	12.0216	30.1485	-1.42425	0.372614	6.97887e-45	5.1366e-44
Dixdc1	6.63984	1.5532	1.99694	3.99151	7.02016e-45	5.16431e-44
Ddhd1	3.93717	8.88829	-1.27323	0.413731	7.49715e-45	5.51233e-44
Smad3	11.5261	19.98	-0.891234	0.539153	8.64416e-45	6.35238e-44
Ran	288.21	441.69	-0.713773	0.609723	8.75403e-45	6.42978e-44
Qk	44.7657	69.8488	-0.739864	0.598796	9.10905e-45	6.68707e-44
Acss2	7.09215	2.13996	1.63012	3.0954	9.25031e-45	6.78724e-44
Id1	92.2095	233.346	-1.43673	0.369403	9.40411e-45	6.89651e-44
Ptk7	34.1738	56.5318	-0.824019	0.564866	9.48787e-45	6.95432e-44
Crocc	3.79894	1.05565	1.74943	3.36225	1.08646e-44	7.95934e-44
Chchd3	42.2972	71.1657	-0.848336	0.555425	1.10737e-44	8.10829e-44
Epha3	0.994616	0.027454	5.03115	32.6984	1.19875e-44	8.77284e-44
Btbd11	1.00334	0.0552331	4.07361	16.8376	1.21274e-44	8.87062e-44
Cdk5	23.9307	10.9444	1.03085	2.04323	1.27267e-44	9.30415e-44
Uhrf1bp1	5.93614	10.0911	-0.863662	0.549556	1.30367e-44	9.52587e-44
Fermt2	43.6724	69.5702	-0.769528	0.586609	1.31237e-44	9.58451e-44
Ect2	39.0737	64.955	-0.831449	0.561964	1.43137e-44	1.04482e-43
Prdm16	0.322525	0.00118623	7.54718	187.037	1.49303e-44	1.08926e-43
Gltp	30.1012	53.3702	-0.923983	0.527052	1.63777e-44	1.19425e-43
Cnksr3	12.0271	4.22658	1.41138	2.65991	1.66218e-44	1.21142e-43
Whrn	0.484155	2.9949	-2.72658	0.151084	1.70424e-44	1.24144e-43
Stac2	2.64326	0.179909	3.77208	13.6619	1.84459e-44	1.34298e-43
Ptprf	15.1636	26.8226	-0.920966	0.528155	1.8544e-44	1.34943e-43
Cdk16	52.4916	27.0042	0.861061	1.81637	1.90142e-44	1.38293e-43
Rhou	5.38003	12.4951	-1.31321	0.402424	1.91543e-44	1.3924e-43
Tmem26	0.525091	0	9.40859	679.624	2.0844e-44	1.51446e-43
Slmo2	46.7406	87.4623	-1.00177	0.499387	2.29838e-44	1.66907e-43
Scap	17.1772	28.1874	-0.812333	0.56946	2.38307e-44	1.72968e-43
Pamr1	2.45391	0.205865	3.46977	11.0791	2.42896e-44	1.76208e-43
Fam212b	0.12117	1.48501	-3.70272	0.0768016	2.4934e-44	1.8079e-43
Parp1	39.4399	61.617	-0.741529	0.598105	2.73371e-44	1.98113e-43
Btc	1.37655	0.0484372	4.69335	25.8725	3.10247e-44	2.24722e-43
Chn1	1.68636	0.108081	3.85424	14.4625	3.12519e-44	2.26252e-43
Uap1l1	25.4133	49.347	-1.05459	0.481434	3.13506e-44	2.26851e-43
Tmem144	1.18431	6.46426	-2.54587	0.171244	3.16358e-44	2.28797e-43
Alkbh7	4.68487	16.3396	-1.90078	0.267799	3.75143e-44	2.71173e-43
Sod2	53.2004	27.8987	0.833343	1.78181	3.93174e-44	2.84061e-43
Mgmt	1.43919	16.5556	-3.61528	0.0816002	3.95725e-44	2.85759e-43
Dyrk3	0.570522	4.12243	-2.94707	0.129671	3.99841e-44	2.88584e-43
2900011O08Rik	1.36653	0.00424776	7.78958	221.256	4.68507e-44	3.3797e-43
Cdsn	6.04168	0.706764	2.99507	7.9727	5.6138e-44	4.0476e-43
Perm1	1.28729	0.0726138	4.03398	16.3814	5.79704e-44	4.17759e-43
Dnajc12	4.96291	0.36189	3.66509	12.6854	6.258e-44	4.50748e-43
Gale	24.5577	6.87858	1.73743	3.33442	7.00371e-44	5.04203e-43
Reck	4.80917	1.40903	1.67298	3.18873	7.19129e-44	5.17443e-43
Gpatch4	21.9366	40.257	-0.973761	0.509177	7.23337e-44	5.20207e-43
Shb	9.94643	18.6115	-1.00133	0.499538	7.26752e-44	5.22397e-43
Mdfi	0.0887379	2.11807	-4.63084	0.0403625	7.97919e-44	5.73261e-43
2900026A02Rik	18.5297	9.22725	0.908038	1.87649	8.79382e-44	6.31467e-43
Anxa4	72.5644	35.5451	0.931684	1.9075	8.8845e-44	6.37654e-43
Aifm1	49.55	25.4391	0.863999	1.82008	9.726e-44	6.97696e-43
Nuak1	14.2535	25.0955	-0.913653	0.530839	1.019e-43	7.30613e-43
Cxx1a	24.488	8.11949	1.49497	2.81858	1.06159e-43	7.60758e-43
Cacnb2	2.32705	0.338192	2.68213	6.41803	1.17282e-43	8.40043e-43
Lzts2	60.1903	32.6446	0.784777	1.72283	1.17634e-43	8.42143e-43
Arfgef1	13.1651	21.246	-0.7886	0.578906	1.33125e-43	9.52559e-43
Tiam1	8.3446	14.6464	-0.909261	0.532458	1.56359e-43	1.11824e-42
Klhl23	5.16382	1.82294	1.40407	2.64647	1.57003e-43	1.12228e-42
Ppef1	0.0123256	1.02622	-6.30758	0.0126249	1.67701e-43	1.19814e-42
Kras	17.204	29.0275	-0.85264	0.55377	1.6779e-43	1.19818e-42
Scrib	19.7936	31.3808	-0.762784	0.589358	1.70227e-43	1.21496e-42
Nampt	31.5317	15.7879	0.900435	1.86663	1.7045e-43	1.21594e-42
Stard7	19.1951	34.5654	-0.946291	0.518965	1.92554e-43	1.37293e-42
Nbea	3.20158	5.90205	-0.980748	0.506717	2.00277e-43	1.42728e-42
Ten1	7.77634	22.8033	-1.64847	0.318979	2.10738e-43	1.50107e-42
Pacsin2	42.0881	79.2575	-1.01121	0.496128	2.16142e-43	1.53879e-42
Gas1	121.193	44.8965	1.33452	2.52191	2.17543e-43	1.54798e-42
Etf1	58.0762	96.046	-0.823807	0.564949	2.18145e-43	1.55148e-42
Rps6ka3	10.1577	18.7027	-0.978975	0.50734	2.22601e-43	1.58238e-42
C1ql1	2.13931	0.00789948	7.51927	183.454	2.23614e-43	1.58878e-42
Nek7	33.5532	54.9771	-0.810323	0.570254	2.31661e-43	1.64513e-42
Jak1	45.089	25.1172	0.746091	1.67724	2.37537e-43	1.68601e-42
Plec	67.838	36.8485	0.782526	1.72014	2.48222e-43	1.76097e-42
Celf4	3.47147	0.396479	3.02688	8.15047	2.534e-43	1.7968e-42
Sec62	73.3426	41.725	0.715868	1.64247	2.63005e-43	1.86397e-42
Gpr133	0.00984302	0.746125	-6.2335	0.0132901	2.70258e-43	1.91442e-42
9430015G10Rik	16.0689	5.46737	1.45784	2.74697	2.73183e-43	1.93417e-42
Rnase10	1.69077	0	9.46336	705.921	2.77252e-43	1.96199e-42
Tagap1	2.39909	6.72397	-1.58407	0.33354	2.91378e-43	2.06092e-42
Endod1	4.44464	9.61669	-1.21214	0.431629	3.05439e-43	2.1593e-42
Lctl	1.96515	0.11909	3.92652	15.2055	3.11607e-43	2.2018e-42
Trib3	3.37299	16.5021	-2.38896	0.19092	3.29061e-43	2.32397e-42
Map3k8	4.38635	0.90999	2.16924	4.49787	3.57202e-43	2.52146e-42
Rrp15	29.6894	55.1076	-0.989756	0.503563	3.8635e-43	2.72585e-42
Ctsb	123.933	213.099	-0.879682	0.543487	3.88135e-43	2.73708e-42
Cast	51.2087	29.0149	0.721747	1.64918	3.91645e-43	2.76046e-42
Pigyl	11.1389	29.7411	-1.51345	0.350274	4.89614e-43	3.44925e-42
Gm6484	0.0596276	3.5212	-5.89408	0.0168153	5.13615e-43	3.61653e-42
Ormdl1	5.74232	14.8917	-1.47162	0.360578	5.19112e-43	3.65342e-42
Rps20	1001.69	463.664	1.01343	2.0187	5.28192e-43	3.71547e-42
Ptpn7	0.0532743	0.967323	-4.25452	0.0523915	5.40469e-43	3.79994e-42
Snx2	34.023	59.5402	-0.905413	0.53388	5.49539e-43	3.8618e-42
3110007F17Rik	0	2.5346	-9.32068	0.00156385	5.53787e-43	3.88971e-42
Tprg	4.06228	0.0925124	5.3186	39.9079	5.69311e-43	3.99676e-42
AI837181	56.2657	21.0441	1.3214	2.49908	5.96546e-43	4.18589e-42
Cnp	8.3279	2.55724	1.60503	3.04202	5.99033e-43	4.20126e-42
Hsf4	0.446581	5.4465	-3.70215	0.076832	6.13422e-43	4.30004e-42
Mrpl33	42.3336	91.5976	-1.21047	0.432129	6.15184e-43	4.31025e-42
Fzd4	1.13895	3.88694	-1.86765	0.27402	6.25455e-43	4.38004e-42
Fam189a2	0.0963103	1.91504	-4.39378	0.0475708	7.20175e-43	5.04087e-42
Il1f6	2.74845	0	9.28076	621.996	7.51672e-43	5.25873e-42
Bdkrb1	2.66789	0.0666873	5.16185	35.7992	7.96912e-43	5.57247e-42
Anapc1	32.4697	57.2345	-0.91612	0.529932	8.29931e-43	5.80049e-42
Erbb2	18.3433	9.15431	0.904805	1.87229	8.56089e-43	5.98035e-42
Erap1	4.74722	9.92291	-1.16205	0.446878	8.74361e-43	6.10498e-42
Fkbp11	31.9086	78.3238	-1.3922	0.380983	8.85468e-43	6.17948e-42
Foxa1	1.63103	0.0777665	4.26841	19.2717	9.68582e-43	6.75618e-42
Shroom1	2.4561	0.273049	3.06339	8.35935	9.8657e-43	6.87826e-42
Rps27l	119.011	214.58	-0.948345	0.518227	1.00296e-42	6.9891e-42
Ghr	66.2897	108.866	-0.813334	0.569065	1.0486e-42	7.30351e-42
Ap2a2	40.454	63.4428	-0.7471	0.5958	1.07713e-42	7.49856e-42
Cdc42ep3	28.1993	48.3709	-0.876413	0.54472	1.09185e-42	7.5973e-42
Tubg2	1.93865	0.0841728	4.3962	21.0566	1.09873e-42	7.64138e-42
Faf2	31.9048	16.6633	0.839484	1.78941	1.15273e-42	8.013e-42
Dgkz	11.1424	19.8523	-0.931138	0.524444	1.25807e-42	8.74095e-42
Mfsd10	17.6231	32.1077	-0.962739	0.513082	1.34e-42	9.30562e-42
H60b	0.0104689	3.49083	-7.97878	0.00396414	1.53148e-42	1.06301e-41
Sfxn3	52.7439	26.062	0.919	1.8908	1.56475e-42	1.08557e-41
Ddx26b	4.46384	1.21586	1.77786	3.42917	1.70117e-42	1.17964e-41
Csdc2	0.694405	7.3084	-3.49387	0.0887649	1.71624e-42	1.18951e-41
Noc2l	26.0299	45.0907	-0.890157	0.539555	1.7223e-42	1.19312e-41
Cetn2	23.3035	8.16984	1.41368	2.66415	1.78111e-42	1.23326e-41
Slc25a1	60.4829	30.5069	0.889952	1.85311	1.79627e-42	1.24315e-41
S100a11	946.39	1565.89	-0.824005	0.564872	1.86594e-42	1.29073e-41
Gm10094	285.121	452.363	-0.763796	0.588945	1.9599e-42	1.35507e-41
Zbtb44	3.43969	6.50292	-1.0166	0.494281	2.05374e-42	1.41925e-41
Osbpl10	1.99977	7.19408	-1.94424	0.259852	2.1053e-42	1.45417e-41
Igf2bp1	9.93619	16.0369	-0.788316	0.579019	2.13771e-42	1.47583e-41
9930111J21Rik1	6.19181	1.96106	1.56032	2.94918	2.14982e-42	1.48347e-41
Ralgapa2	1.05008	2.53669	-1.37079	0.386678	2.28021e-42	1.57268e-41
Fh1	43.5504	73.3699	-0.850616	0.554548	2.56231e-42	1.76638e-41
Abcc1	44.786	22.9599	0.86612	1.82275	2.60306e-42	1.7936e-41
Ccdc80	41.99	79.0996	-1.01146	0.496045	2.86932e-42	1.9761e-41
Ahctf1	15.0376	24.2606	-0.787893	0.579189	2.99943e-42	2.0647e-41
Zeb1	13.5313	6.6098	0.935474	1.91252	3.41974e-42	2.35288e-41
Phtf2	2.47575	6.11187	-1.40135	0.378575	3.77055e-42	2.59299e-41
Nynrin	12.5433	5.38454	1.12219	2.17677	3.98944e-42	2.74218e-41
Fmnl3	36.5009	18.7712	0.861512	1.81694	4.04096e-42	2.77625e-41
Xk	0.954718	0.0435892	4.33745	20.2163	4.56334e-42	3.13361e-41
Rora	10.926	2.34458	2.12082	4.34943	4.81718e-42	3.30632e-41
Eif3j2	52.9001	82.6615	-0.741738	0.598018	5.19804e-42	3.56599e-41
Me2	25.5093	43.7342	-0.875286	0.545146	5.21618e-42	3.5767e-41
Sbsn	21.0576	8.97989	1.13099	2.19008	5.33916e-42	3.65925e-41
Zdhhc1	10.1624	3.07777	1.62487	3.08414	5.90512e-42	4.04518e-41
Strn	10.1625	20.2326	-1.0915	0.469272	5.92521e-42	4.05697e-41
Sumo3	44.8209	69.8077	-0.736846	0.60005	7.30473e-42	4.99911e-41
Myo5b	0.0350884	0.718664	-4.4244	0.0465719	7.45158e-42	5.09714e-41
Fam195a	3.79928	19.5879	-2.4601	0.181734	7.66087e-42	5.23777e-41
Hacd2	7.9461	17.6336	-1.24723	0.421257	8.15738e-42	5.57454e-41
Col23a1	2.24676	0.317007	2.72633	6.61768	8.39421e-42	5.73361e-41
Lrp10	29.712	49.2936	-0.827933	0.563336	8.44619e-42	5.76633e-41
Akr1b3	175.638	97.7033	0.748411	1.67994	8.67775e-42	5.92156e-41
Cd93	1.0536	0.0914928	3.41844	10.6918	8.86007e-42	6.04306e-41
Vdac1	157.294	245.864	-0.742323	0.597776	9.33277e-42	6.36239e-41
D1Ertd622e	7.30075	14.6355	-1.10134	0.466083	9.74522e-42	6.64037e-41
Abca2	4.00018	7.12717	-0.931383	0.524355	1.06291e-41	7.23915e-41
Gpi1	95.6604	149.347	-0.740433	0.59856	1.07555e-41	7.32171e-41
Ccdc92	2.91838	9.66223	-1.82549	0.282145	1.0807e-41	7.35326e-41
Spns2	4.34669	1.00559	2.01165	4.03243	1.14993e-41	7.82049e-41
Rnd3	49.1613	81.4803	-0.82661	0.563853	1.20109e-41	8.16456e-41
Clcn6	11.13	4.44904	1.22455	2.33683	1.2059e-41	8.19329e-41
Tceb1	51.5136	91.8344	-0.93201	0.524127	1.33581e-41	9.07155e-41
Fbxo25	23.6753	11.0692	0.999066	1.99871	1.34733e-41	9.14539e-41
Atl3	61.315	34.2237	0.743133	1.67381	1.43045e-41	9.70498e-41
Scml2	0.660516	0.0170471	5.12412	34.8749	1.75402e-41	1.18945e-40
Pgpep1	10.7901	4.37442	1.20471	2.30491	1.89074e-41	1.28155e-40
Tuba1a	656.105	363.561	0.75401	1.68647	2.85002e-41	1.93083e-40
Hoxa10	0.0664643	1.42449	-4.49095	0.0444724	2.96902e-41	2.01049e-40
Kcnb1	0.00089267	0.24165	-7.67946	0.00487811	3.41413e-41	2.31079e-40
Tbl3	24.0798	40.3586	-0.84296	0.557499	3.67378e-41	2.48534e-40
Spsb1	18.6593	8.11093	1.10382	2.14924	3.75978e-41	2.5423e-40
Mtss1l	14.9668	7.67806	0.865067	1.82142	3.82774e-41	2.58701e-40
Eml5	0.386761	1.31979	-1.86707	0.274129	4.13778e-41	2.79522e-40
Plcxd2	1.34518	3.45555	-1.4589	0.363772	4.19125e-41	2.83e-40
Tll1	1.1369	0.0160549	5.9764	62.9615	4.40851e-41	2.97527e-40
Cebpz	23.2992	36.7679	-0.756008	0.592132	4.51306e-41	3.04438e-40
Gap43	3.00479	0.145295	4.24411	18.9498	4.91439e-41	3.31352e-40
Atpif1	153.157	75.4407	0.923695	1.89697	5.42412e-41	3.65547e-40
Ankrd12	5.23566	9.52984	-0.962515	0.513162	5.52001e-41	3.71831e-40
Atp2b4	10.3812	3.55319	1.44825	2.72877	6.06847e-41	4.08581e-40
Xpnpep2	0.699882	0.0108474	5.79974	55.7054	6.37736e-41	4.29174e-40
Sec23a	39.7618	22.286	0.737311	1.66707	7.06368e-41	4.75135e-40
Pias1	20.134	10.2314	0.87909	1.83921	7.29302e-41	4.90328e-40
Notch2	24.2779	13.1087	0.791119	1.73042	7.36987e-41	4.9526e-40
Lgals3bp	5.19604	11.9747	-1.30158	0.405682	7.689e-41	5.1646e-40
Apoo	10.621	27.6974	-1.48003	0.358481	7.70592e-41	5.1735e-40
Igsf8	22.7216	38.5342	-0.859868	0.551003	7.9067e-41	5.30578e-40
Pcnxl3	20.5306	10.9124	0.813877	1.75793	8.14992e-41	5.4664e-40
Lamtor3	36.9393	61.3231	-0.829108	0.562877	8.36425e-41	5.6075e-40
Wdr19	5.12647	1.59928	1.58281	2.99552	8.87786e-41	5.949e-40
Bend3	4.32933	8.76704	-1.11628	0.461282	8.90806e-41	5.96642e-40
Orc3	11.2185	5.58698	0.907675	1.87602	9.03146e-41	6.0462e-40
Eif4a2	242.295	132.933	0.768438	1.70342	9.10139e-41	6.09014e-40
Rin2	16.3571	8.16219	0.904845	1.87234	1.01458e-40	6.78575e-40
Lrp12	7.25251	13.179	-0.95992	0.514085	1.01789e-40	6.80472e-40
Mcc	3.57521	8.67469	-1.37617	0.385241	1.14878e-40	7.67612e-40
Pigv	3.89779	0.830188	2.13299	4.38626	1.19749e-40	7.99777e-40
Esyt1	20.9923	10.03	0.967622	1.95561	1.27687e-40	8.52389e-40
Dis3	24.6591	42.0151	-0.866783	0.548368	1.31262e-40	8.75842e-40
Ivl	0.0107321	1.21573	-6.68953	0.00968837	1.4462e-40	9.64517e-40
Asns	44.0336	83.9366	-1.02914	0.490002	1.48895e-40	9.92566e-40
Nt5e	2.59595	0.238832	3.33712	10.1059	1.50059e-40	9.99848e-40
Cbl	2.66432	7.34059	-1.55971	0.339219	1.53795e-40	1.02426e-39
Lrfn4	29.6163	15.2289	0.861497	1.81692	1.54162e-40	1.02622e-39
Acsbg1	0.173237	3.38908	-4.37955	0.0480425	1.57494e-40	1.04791e-39
Eny2	26.1277	43.4117	-0.830724	0.562247	1.67201e-40	1.11197e-39
Ggt7	1.29674	4.83857	-1.99645	0.250616	1.69599e-40	1.12739e-39
Rab30	9.42849	2.24576	1.9701	3.91797	1.87977e-40	1.24897e-39
Cnnm4	2.03092	5.42238	-1.51386	0.350172	2.04628e-40	1.35897e-39
U2af1	113.684	177.77	-0.743067	0.597468	2.12948e-40	1.41355e-39
Smap1	26.0996	42.8582	-0.813585	0.568966	2.15763e-40	1.43157e-39
Abcb7	8.35527	15.4806	-0.988082	0.504148	2.16624e-40	1.43661e-39
Rab5b	41.6981	19.8034	0.976701	1.96796	2.18605e-40	1.44906e-39
Gars	99.4691	159.813	-0.782116	0.581513	2.37443e-40	1.5732e-39
Hoxd9	2.83122	8.04687	-1.60472	0.3288	2.72651e-40	1.80563e-39
Tcf3	41.3429	22.8262	0.758905	1.69221	2.78648e-40	1.84448e-39
Ghitm	66.9495	111.511	-0.833906	0.561008	3.28447e-40	2.1731e-39
Plekha5	4.67115	1.44646	1.5928	3.01634	3.5802e-40	2.36766e-39
Pdcd2	11.079	27.3819	-1.4023	0.378325	3.7192e-40	2.45843e-39
Rnf207	1.50818	0.0241469	5.78706	55.2178	3.77279e-40	2.49269e-39
Tubb4b	224.33	343.133	-0.711037	0.610881	4.1816e-40	2.76149e-39
Capza2	82.0759	129.077	-0.751074	0.594161	4.32936e-40	2.85774e-39
Anln	61.4566	98.4676	-0.778246	0.583075	4.36292e-40	2.87855e-39
Prelp	2.18237	0.110152	4.19448	18.309	4.38542e-40	2.89205e-39
Lmo4	113.303	61.757	0.777909	1.71464	4.5972e-40	3.0303e-39
Rac3	6.77677	1.08969	2.53509	5.79612	4.80868e-40	3.16822e-39
Rnf4	51.7672	78.6021	-0.700522	0.61535	5.0663e-40	3.33639e-39
Shroom4	3.5153	1.084	1.59854	3.02837	5.2816e-40	3.47656e-39
Glg1	70.1013	39.7573	0.720168	1.64737	5.30787e-40	3.49223e-39
Zdhhc14	0.776156	0	9.27509	619.557	5.61531e-40	3.69279e-39
Telo2	7.11303	13.0943	-0.978259	0.507592	5.87625e-40	3.86259e-39
Uprt	6.32668	16.0989	-1.44519	0.367244	5.90706e-40	3.88104e-39
Ifitm6	6.78907	0.0918593	6.0077	64.3426	6.23286e-40	4.09319e-39
Smyd1	0.0181905	1.01752	-5.80045	0.0179428	6.49737e-40	4.26492e-39
Pcsk6	0.146512	1.48359	-3.4332	0.0925771	6.77623e-40	4.4459e-39
Tnk2	28.2653	46.7432	-0.823399	0.565109	7.01029e-40	4.59734e-39
Pom121	18.9772	29.8175	-0.749748	0.594707	7.77677e-40	5.09762e-39
Oxct1	85.7168	138.838	-0.793702	0.576862	7.87293e-40	5.15826e-39
Zfp612	0.600574	0.0162938	5.04727	33.0659	9.65347e-40	6.32193e-39
Icam1	1.27877	0.0390194	4.88027	29.4515	9.67715e-40	6.3345e-39
Atp5g3	256.986	433.212	-0.851399	0.554247	1.00649e-39	6.58525e-39
Nf2	21.8127	35.1656	-0.786965	0.579562	1.03124e-39	6.74409e-39
Arsb	22.9405	11.8613	0.853558	1.80695	1.07998e-39	7.05959e-39
Smim3	24.45	11.1179	1.03893	2.05471	1.09461e-39	7.15189e-39
Hcn1	0.266831	0	9.07971	541.084	1.20037e-39	7.8393e-39
Nek2	14.3285	24.6303	-0.879698	0.543481	1.20444e-39	7.86225e-39
Gm14137	2.38632	0.399544	2.47828	5.57231	1.23162e-39	8.03596e-39
Inadl	8.96396	2.75332	1.60363	3.03906	1.24389e-39	8.11226e-39
Trappc8	8.80171	15.6484	-0.928525	0.525395	1.26436e-39	8.24192e-39
Dusp12	13.7284	26.5312	-1.04843	0.483495	1.26599e-39	8.24878e-39
Trpm4	4.53221	1.43782	1.5572	2.94282	1.30255e-39	8.48305e-39
Slc31a1	24.1777	12.5575	0.846962	1.79871	1.32294e-39	8.61192e-39
Prdx5	226.113	113.576	0.895484	1.86023	1.35759e-39	8.83339e-39
Zbed4	4.84046	10.4151	-1.20369	0.434165	1.40111e-39	9.11234e-39
Clmp	14.1256	4.97121	1.40862	2.65483	1.60792e-39	1.04526e-38
Hmgn1	378.364	557.643	-0.657438	0.634003	1.62721e-39	1.05731e-38
AK129341	0.509453	2.39362	-2.32953	0.198949	1.79627e-39	1.16663e-38
Sema4f	1.07133	0.0217894	5.43344	43.2144	1.82202e-39	1.18281e-38
Ppp1r3e	0.248122	2.28072	-3.28922	0.102293	1.90026e-39	1.23303e-38
Fbxl20	6.5069	2.35209	1.36968	2.58413	2.11508e-39	1.37179e-38
Atoh8	17.851	6.4963	1.3609	2.56846	2.20389e-39	1.42874e-38
Svip	1.08735	0.0227654	5.40696	42.4284	2.23878e-39	1.45069e-38
Gm9855	16.3587	27.9478	-0.870376	0.547004	2.27233e-39	1.47176e-38
Setbp1	2.65869	0.810856	1.61503	3.06318	2.29903e-39	1.48837e-38
Haus4	16.5062	29.6743	-0.943961	0.519804	2.50528e-39	1.62115e-38
Itgb7	6.82132	1.64792	1.95135	3.86736	2.60396e-39	1.68423e-38
Rhob	37.1198	67.2837	-0.956136	0.515436	2.71236e-39	1.75355e-38
Ubash3b	1.08861	4.37035	-2.1025	0.232855	2.88131e-39	1.86192e-38
Wwp2	21.2457	10.8394	0.873095	1.83159	3.03688e-39	1.96156e-38
Alad	7.97892	17.0119	-1.1895	0.438454	3.05586e-39	1.97292e-38
Rsl1d1	103.254	161.77	-0.745727	0.596367	3.42757e-39	2.21188e-38
Tmco1	11.5419	19.5973	-0.861768	0.550278	3.58236e-39	2.31072e-38
Glod4	25.8641	12.0595	1.00313	2.00435	3.6489e-39	2.35257e-38
Pgd	131.074	73.2448	0.741945	1.67243	4.08346e-39	2.63154e-38
Rab9	41.1984	19.4963	0.981497	1.97451	4.13024e-39	2.66048e-38
Mgp	84.2979	13.7426	2.51754	5.72604	4.24604e-39	2.73383e-38
Ctxn3	1.49547	0.00679584	7.24235	151.413	4.26239e-39	2.7431e-38
Tcea1	68.0873	108.849	-0.775044	0.584371	4.59452e-39	2.9555e-38
2310030G06Rik	1.08767	7.27095	-2.839	0.139758	4.67989e-39	3.00905e-38
Shmt2	86.2211	134.757	-0.742378	0.597753	4.80519e-39	3.08821e-38
Slc4a8	1.98286	0.626053	1.56376	2.95623	5.06251e-39	3.25211e-38
Stxbp6	0.352007	2.48482	-2.91679	0.132422	5.19604e-39	3.33637e-38
Elk3	31.1093	14.4273	1.01077	2.01498	5.23247e-39	3.35823e-38
Gbp7	0.611634	0.0194833	4.82582	28.3606	5.3618e-39	3.43968e-38
Tia1	25.4424	12.9943	0.871269	1.82927	5.49136e-39	3.52119e-38
Ltbp1	100.716	43.6266	1.10932	2.15744	6.62368e-39	4.24534e-38
Sh3bgrl2	4.12931	0.209548	4.19191	18.2764	6.85361e-39	4.39072e-38
Rnps1	115.662	172.958	-0.678229	0.624932	7.28233e-39	4.66326e-38
Thy1	0.271167	13.2756	-5.70243	0.0192042	7.71463e-39	4.93785e-38
Sufu	23.5607	11.6309	0.920996	1.89342	8.98776e-39	5.75013e-38
Slmo1	0.339481	2.90921	-3.19267	0.109373	9.14638e-39	5.84897e-38
Syvn1	33.5162	17.5824	0.8328	1.78114	1.0656e-38	6.81126e-38
Eif3e	304.839	178.172	0.677057	1.59888	1.21802e-38	7.78201e-38
Htr2a	2.00373	0.0869049	4.40494	21.1846	1.22277e-38	7.80883e-38
Tmem59l	2.1147	0.026874	6.08317	67.7979	1.27036e-38	8.10907e-38
Fem1b	14.7893	23.0316	-0.737044	0.599967	1.38084e-38	8.81033e-38
Ccdc86	14.0671	23.8553	-0.859915	0.550985	1.46149e-38	9.32073e-38
Rrp9	24.2791	45.9819	-1.01899	0.49346	1.61674e-38	1.03061e-37
H2afy2	28.4737	12.0832	1.13872	2.20185	1.75476e-38	1.11809e-37
1010001N08Rik	0.22394	5.48416	-4.68255	0.0389414	1.88509e-38	1.2006e-37
Ak1	20.2323	35.7228	-0.917916	0.529273	1.92438e-38	1.22507e-37
Ephx1	19.9406	60.591	-1.70138	0.307493	2.06901e-38	1.31655e-37
Mmp14	70.5707	113.201	-0.779683	0.582495	2.0881e-38	1.3281e-37
Fam131a	0.462221	2.60433	-2.58759	0.166363	2.12605e-38	1.35163e-37
Srrm4	0.0162784	0.553598	-5.13553	0.028448	2.24799e-38	1.42851e-37
[truncated: 12,140 more rows]
