# Supplementary material for: Boosting ATM activity alleviates aging and extends lifespan in a mouse model of progeria
Source: eLife journal article supplement (doi:10.7554/elife.34836), 2018-05-02
Supplement: supp [file elife-34836-supp-v1.zip › elife_poa_e34836_Figure_5_source_data_1.xlsx]

## Sheet: Sheet1
	Lifespan analysis of chloroquine's effect on nematodes in this study.
	Dataset 1
	Genotype	Condition	No. total	No. dead	No. censored	Median lifespan (Days)	Median lifespan extention(%)	Log rank test (p-value)	Culturing temperature
	N2	0μM CQ	68	66	2	25	-	-	20°C
		0.1μM CQ	60	52	8	26	-	-	20°C
		1μM CQ	72	62	10	28	12	0.0037(increase)	20°C
		10μM CQ	55	49	6	24	-	-	20°C
	Dataset 2
	Genotype	Condition	No. total	No. dead	No. censored	Median lifespan (Days)	Median lifespan extention(%)	Log rank test (p-value)	Culturing temperature
	N2	0μM CQ	78	77	1	25	16	<0.0001 (Increase)	20°C
		1μM CQ	65	62	3	29			20°C
	atm-1	0μM CQ	64	64	0	21	-	-	20°C
		1μM CQ	56	55	1	21			20°C
	sir2-4	0μM CQ	56	56	0	25	-	-	20°C
		1μM CQ	57	57	0	25			20°C
	Notice: The Log rank test was performed with GraphPad Prism 5.0.
