# Supplementary material for: Boosting ATM activity alleviates aging and extends lifespan in a mouse model of progeria
Source: eLife journal article supplement (doi:10.7554/elife.34836), 2018-05-02
Supplement: supp [file elife-34836-supp-v1.zip › elife_poa_e34836_Figure_5_source_data_2.xlsx]

## Sheet: Sheet1
	Lifespan analysis of chloroquine's effect on mice.
	Dataset 1
	Genotype	Treatment	No. total	No. dead	No. censored	Median lifespan (Weeks)	Median lifespan extention(%)	Log rank test (p-value)
	Atm-/-	Saline	9	9	0	15.2867	-	-
		CQ	9	9	0	15
	Zmp-/-	Saline	12	12	0	17.1	27.4	<0.0001 (Increase)
		CQ	8	8	0	21.79
	Dataset 2
	Genotype	Gender	No. total	No. dead	No. censored	Median lifespan (Days)	Median lifespan extention(%)	Log rank test (p-value)
	Atm-/-	Male	11	11	0	110	28.63	0.0032 (Increase)
	Atm-/- Sirt6-Tg		11	11	0	141.5
	Atm-/-	Female	9	9	0	117	11.97	0.0384 (Increase)
	Atm-/- Sirt6-Tg		9	9	0	131
	Notice: The Log rank test was performed with GraphPad Prism 5.0.
