# Supplementary figures and images for: Boosting ATM activity alleviates aging and extends lifespan in a mouse model of progeria
Source: eLife journal article supplement (doi:10.7554/elife.34836), 2018-05-02

Figure 2-figure supplement 1

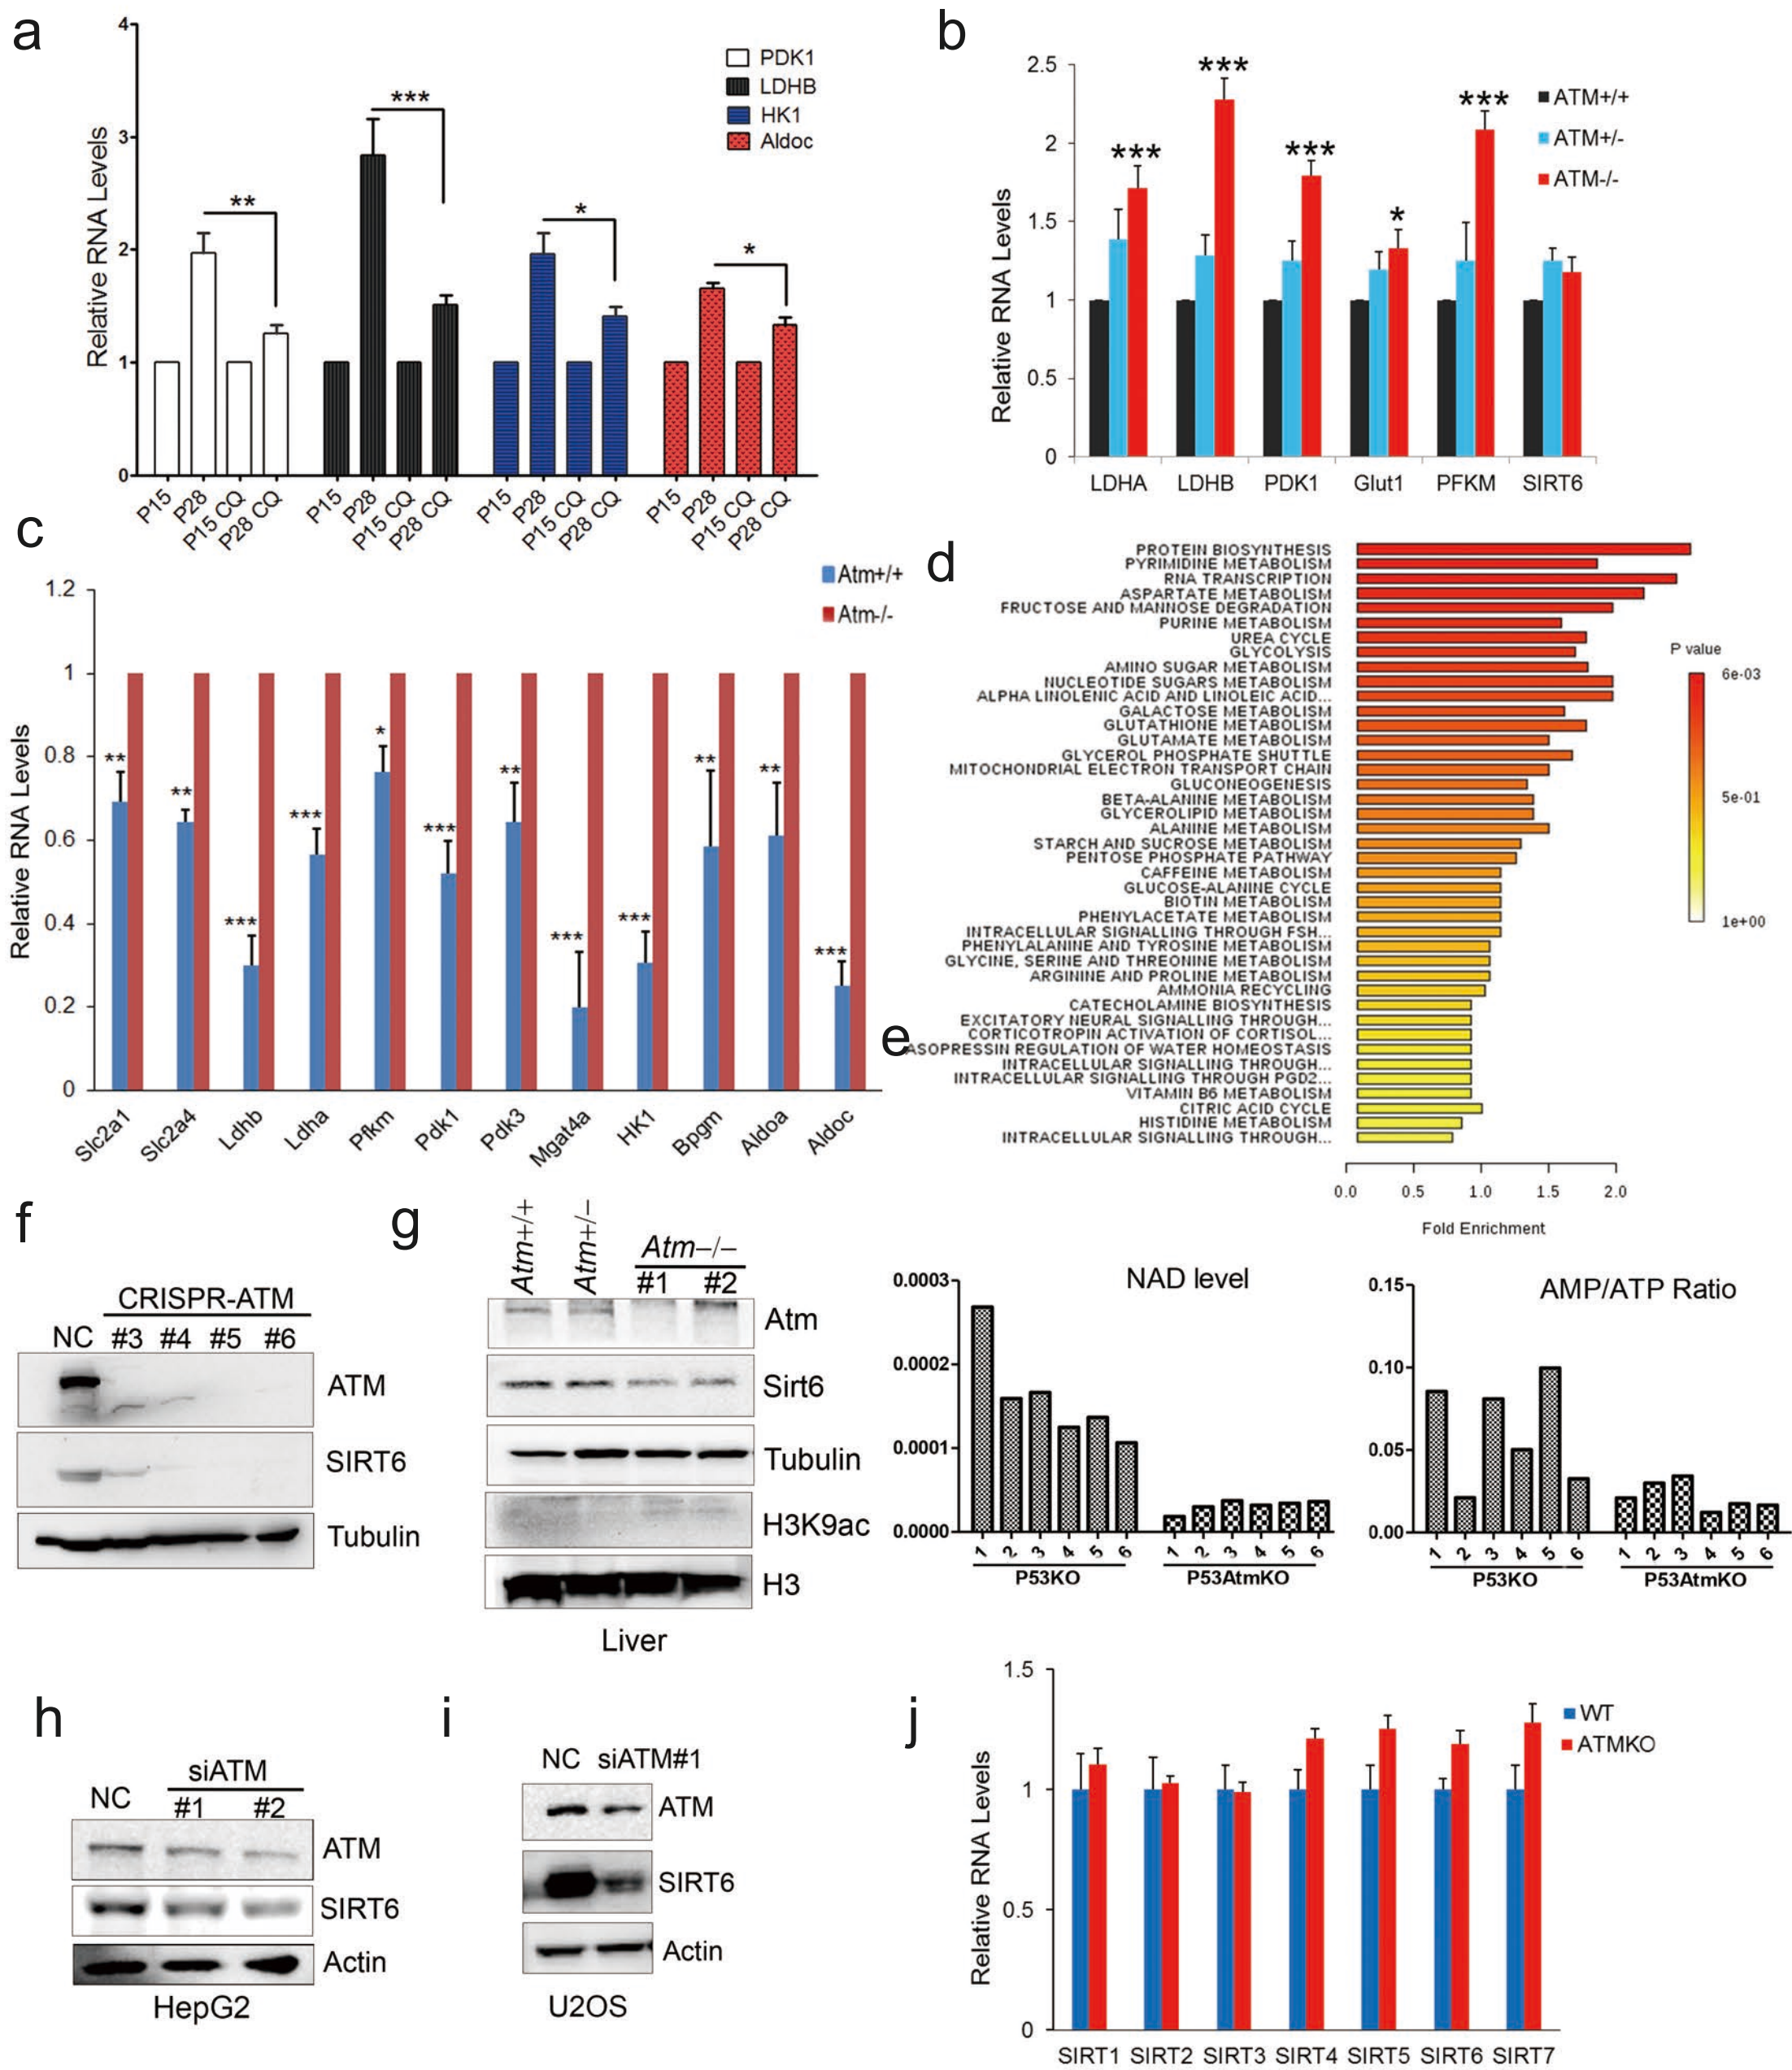

Supplement: supp [file elife-34836-supp-v1.zip › elife_poa_e34836_Figure_2_Figure_Supplement_1.pdf]

# Figure 1-figure supplement 2

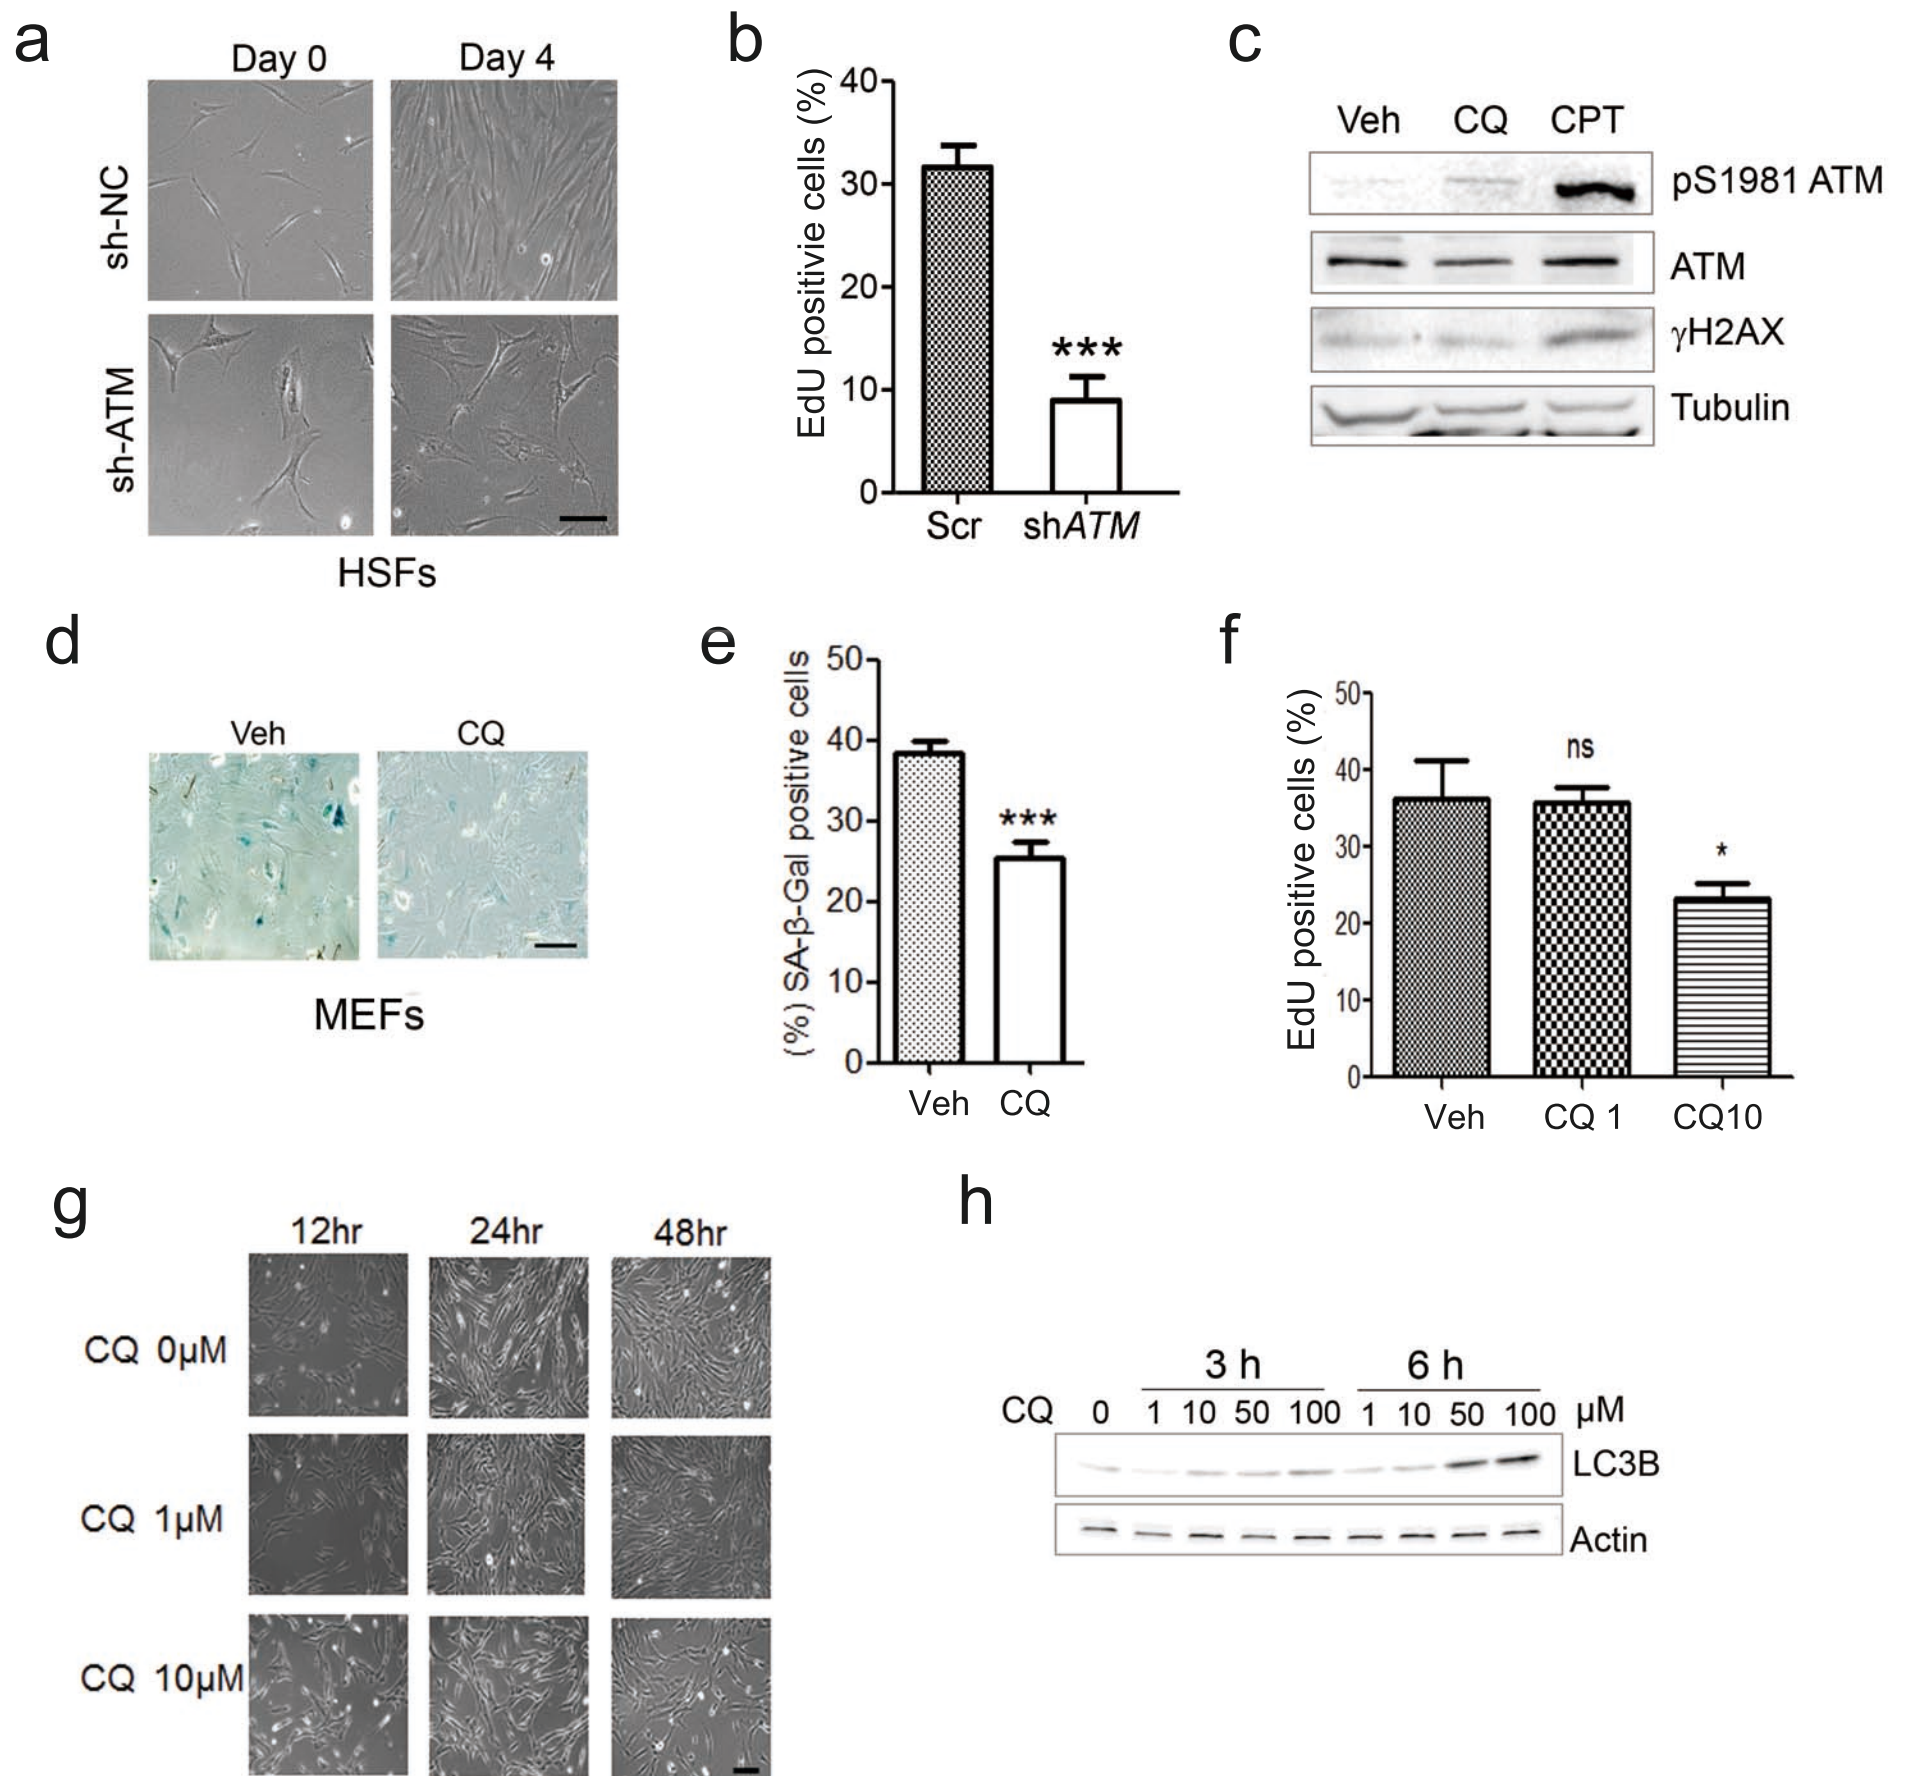

Supplement: supp [file elife-34836-supp-v1.zip › elife_poa_e34836_Figure_1_figure_supplement_2.pdf]

Figure 4-figure supplement 1

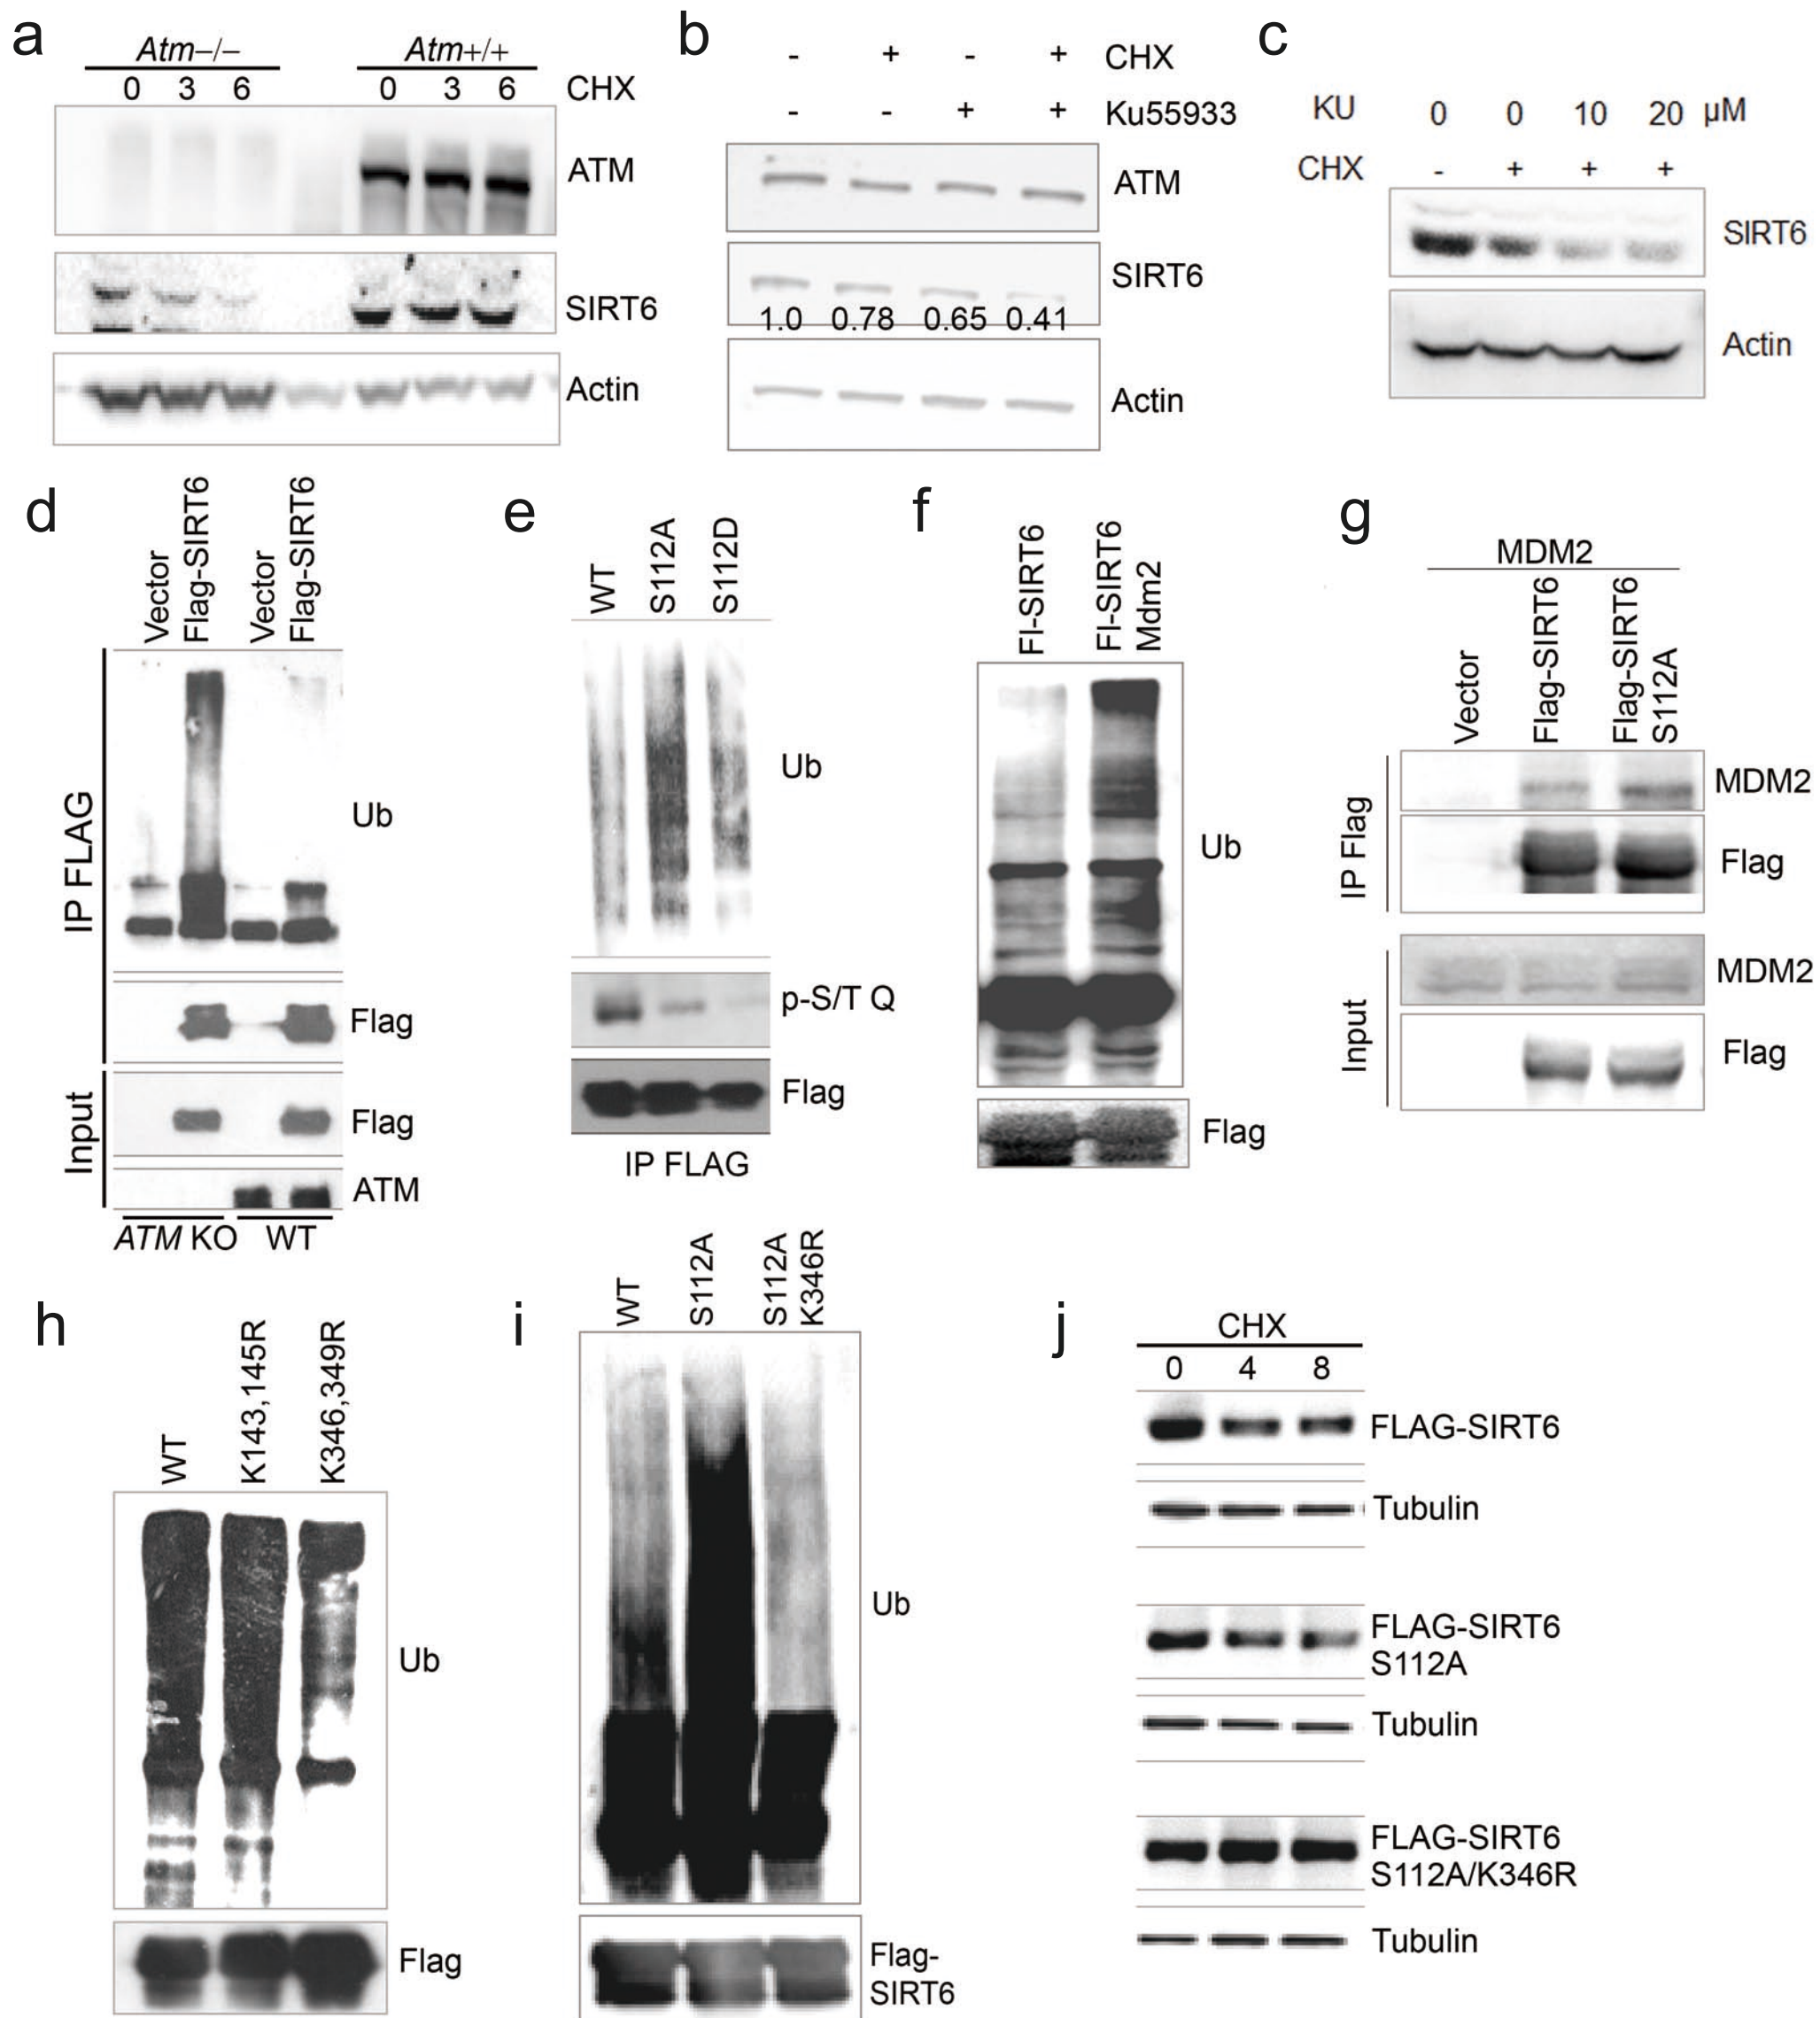

Supplement: supp [file elife-34836-supp-v1.zip › elife_poa_e34836_Figure_4_figure_supplement_1.pdf]

# Figure 3-figure supplement 1

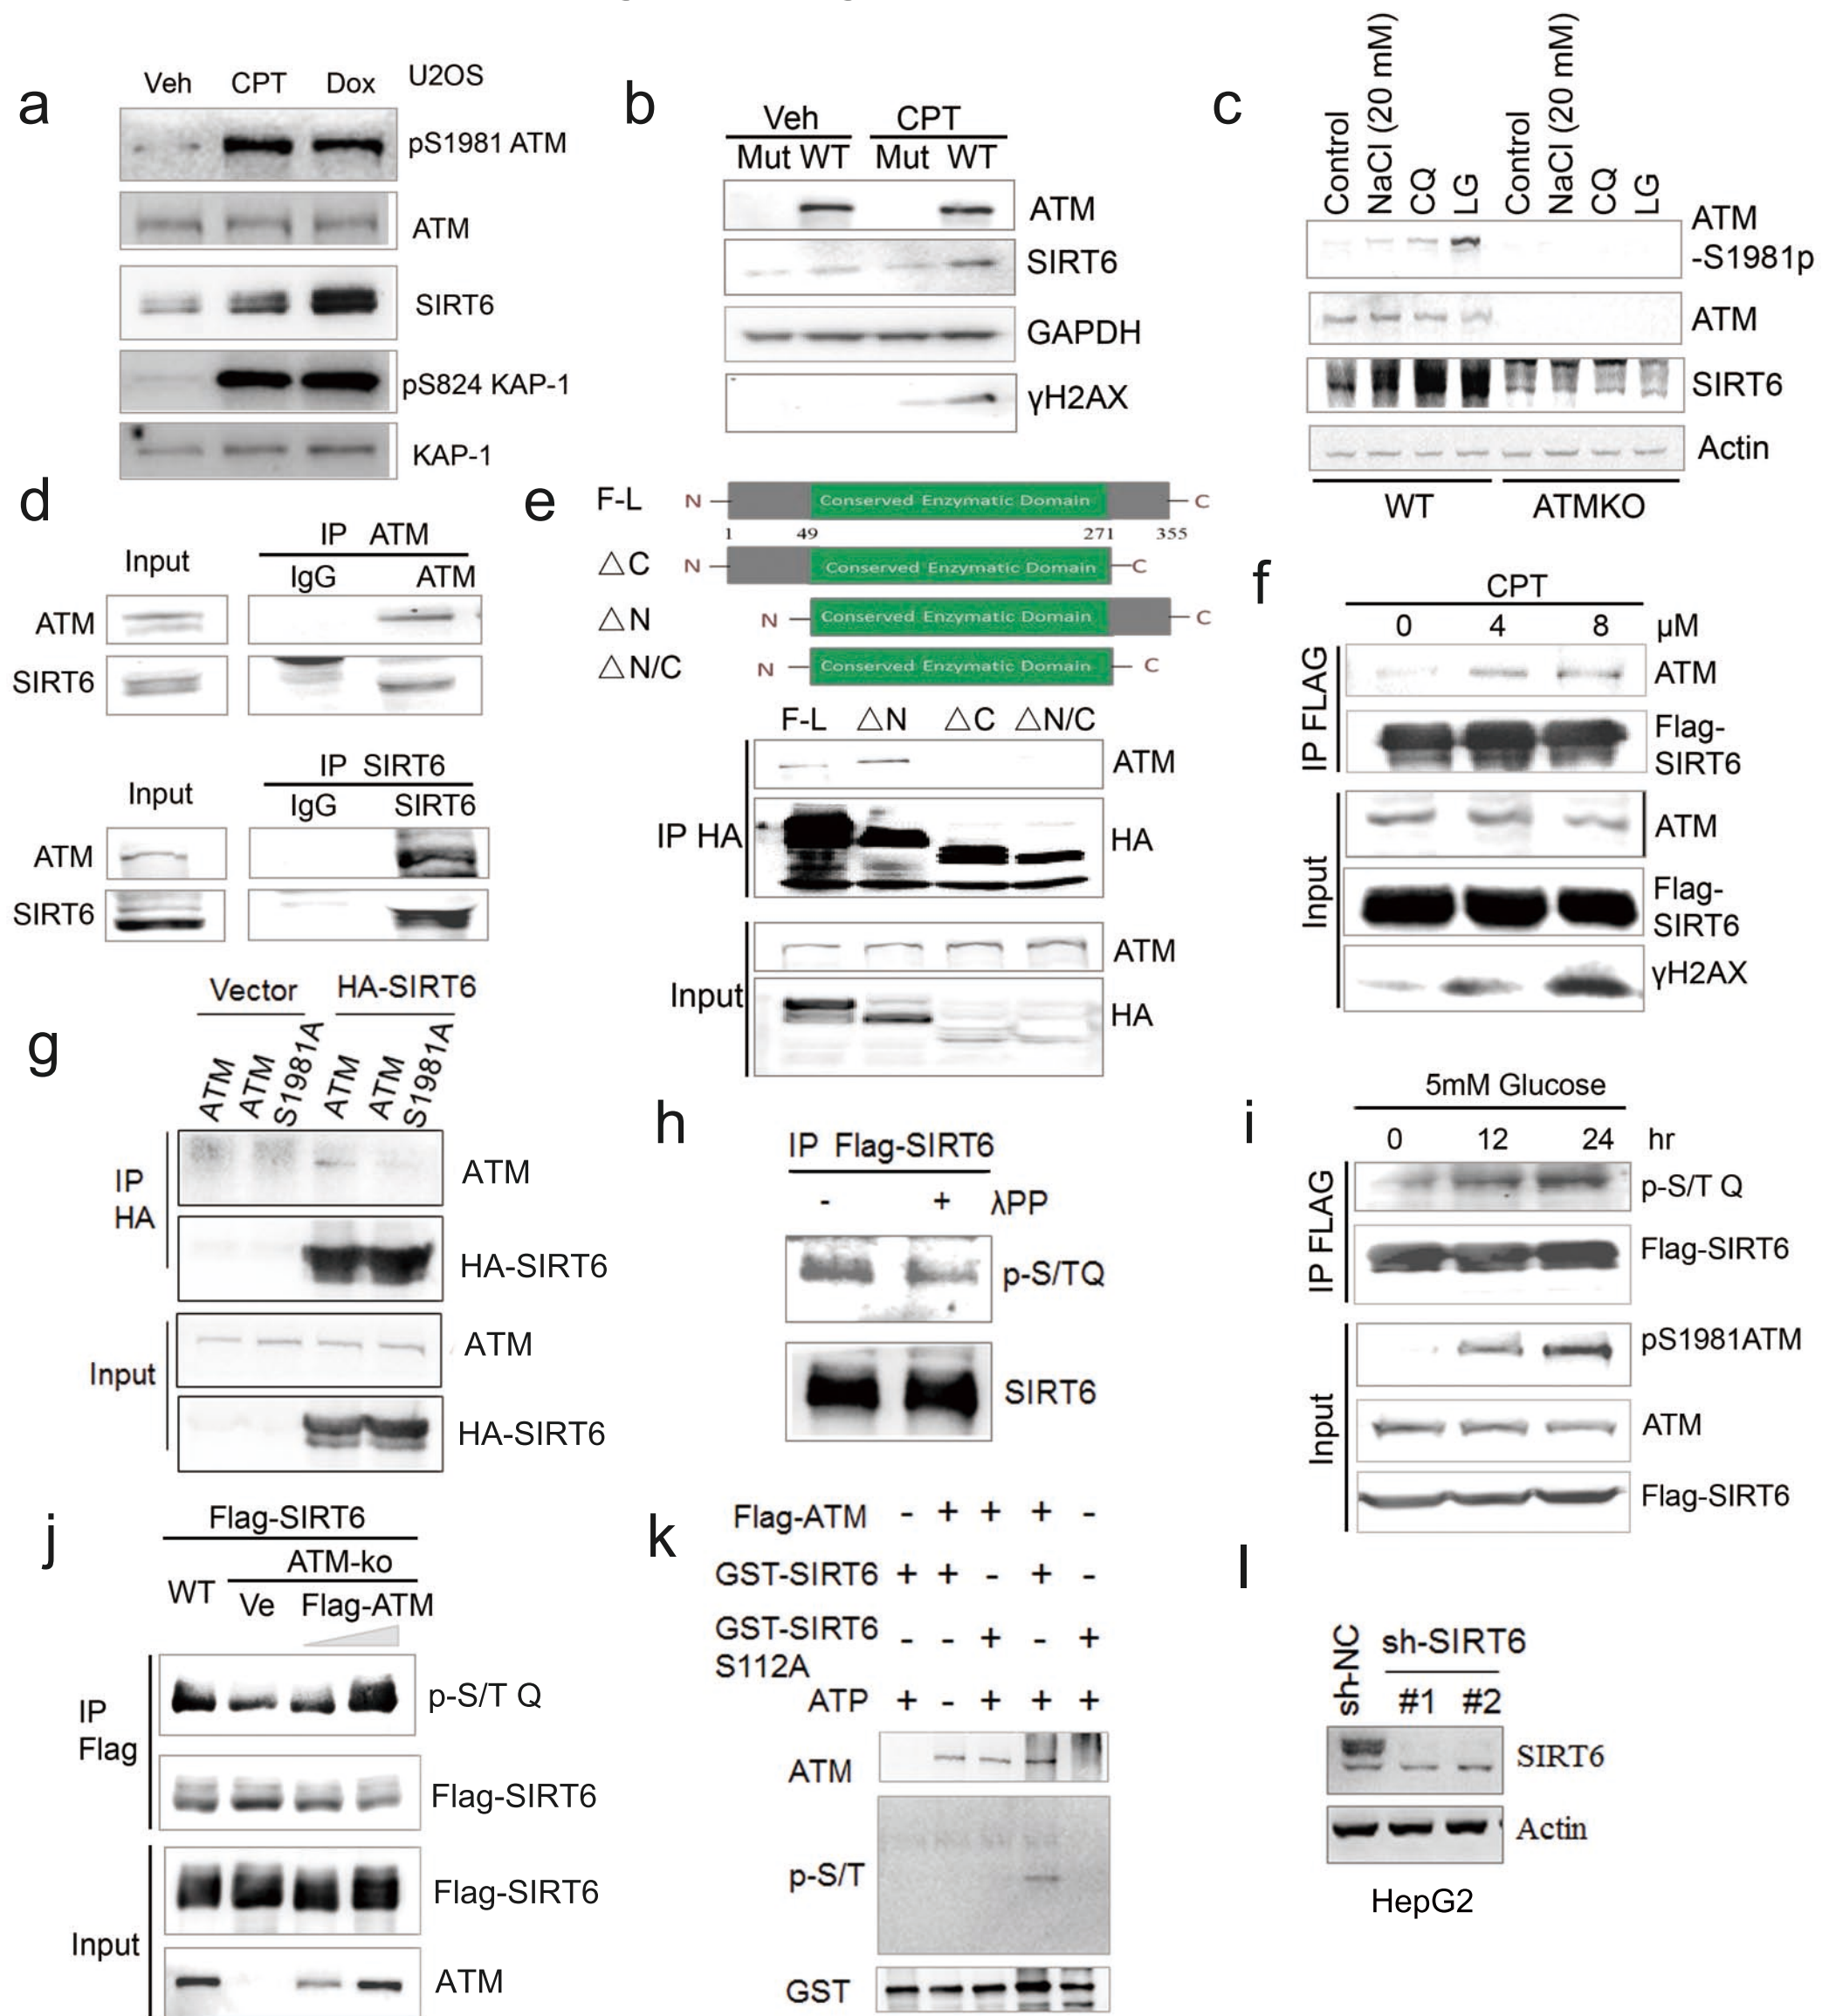

Supplement: supp [file elife-34836-supp-v1.zip › elife_poa_e34836_Figure_3_figure_supplement_1.pdf]

Figure 1-figure supplement 1

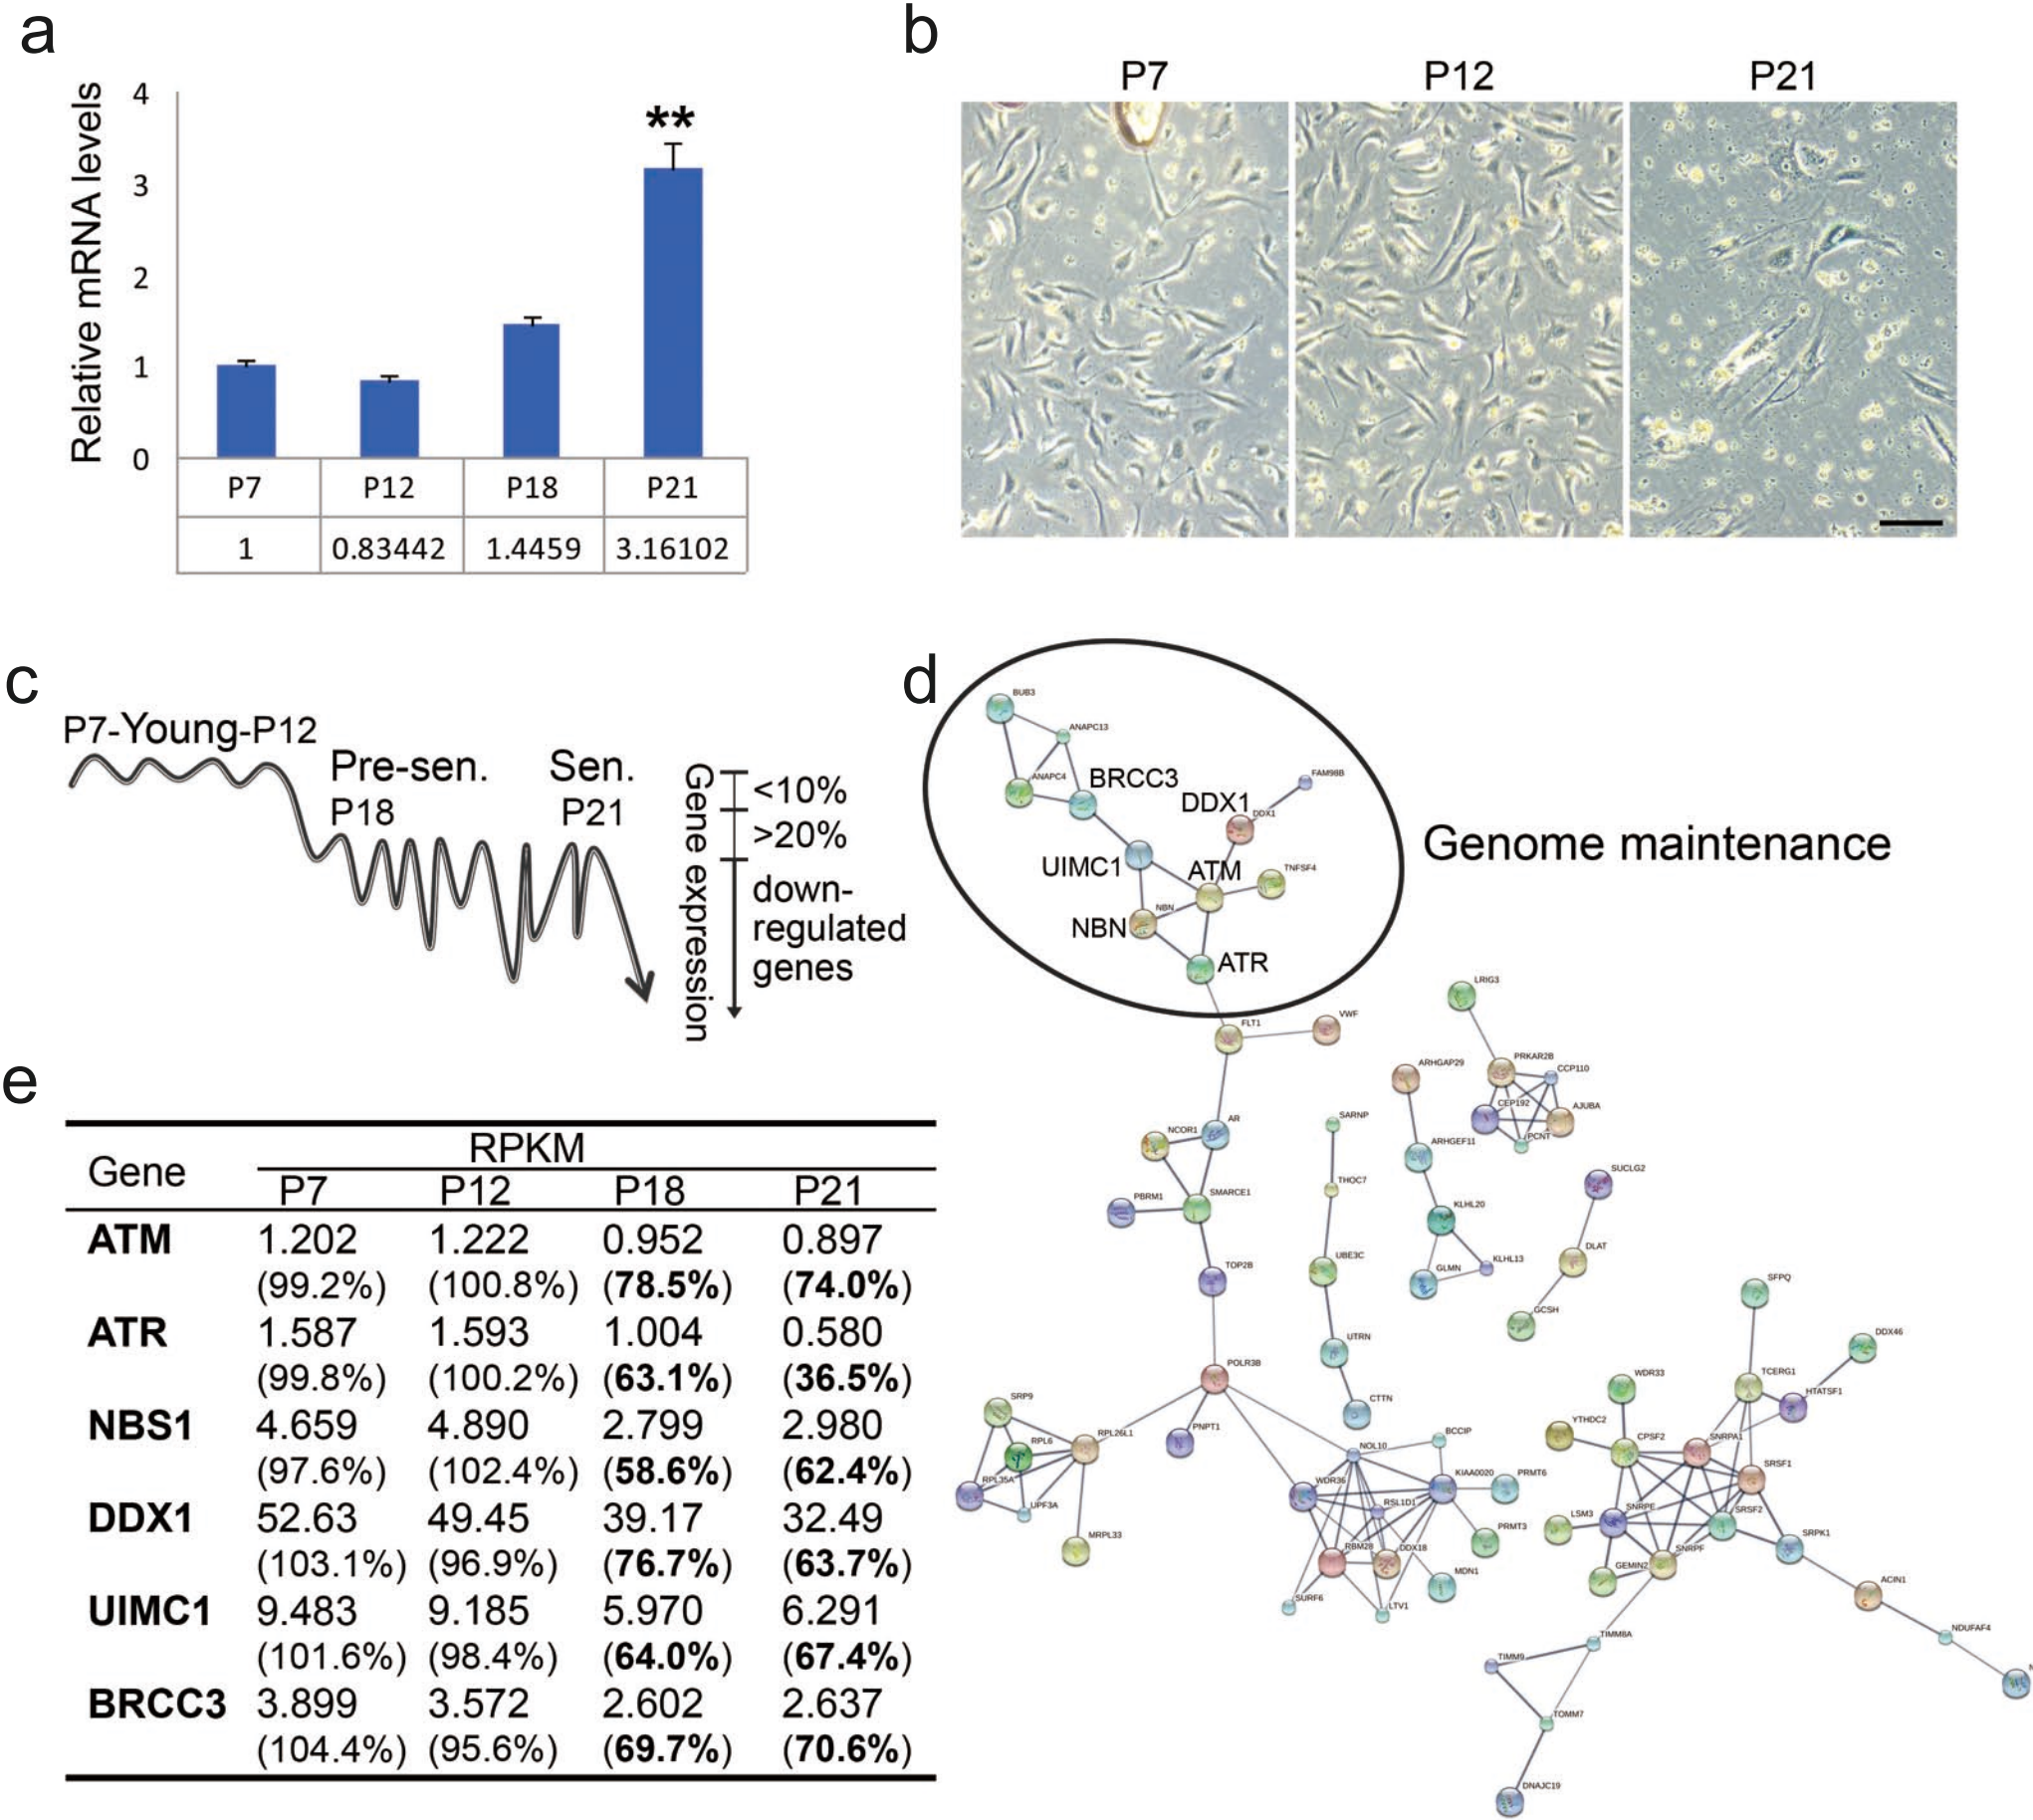

Supplement: supp [file elife-34836-supp-v1.zip › elife_poa_e34836_Figure_1_figure_supplement_1.pdf]

Figure 5-figure supplement 1

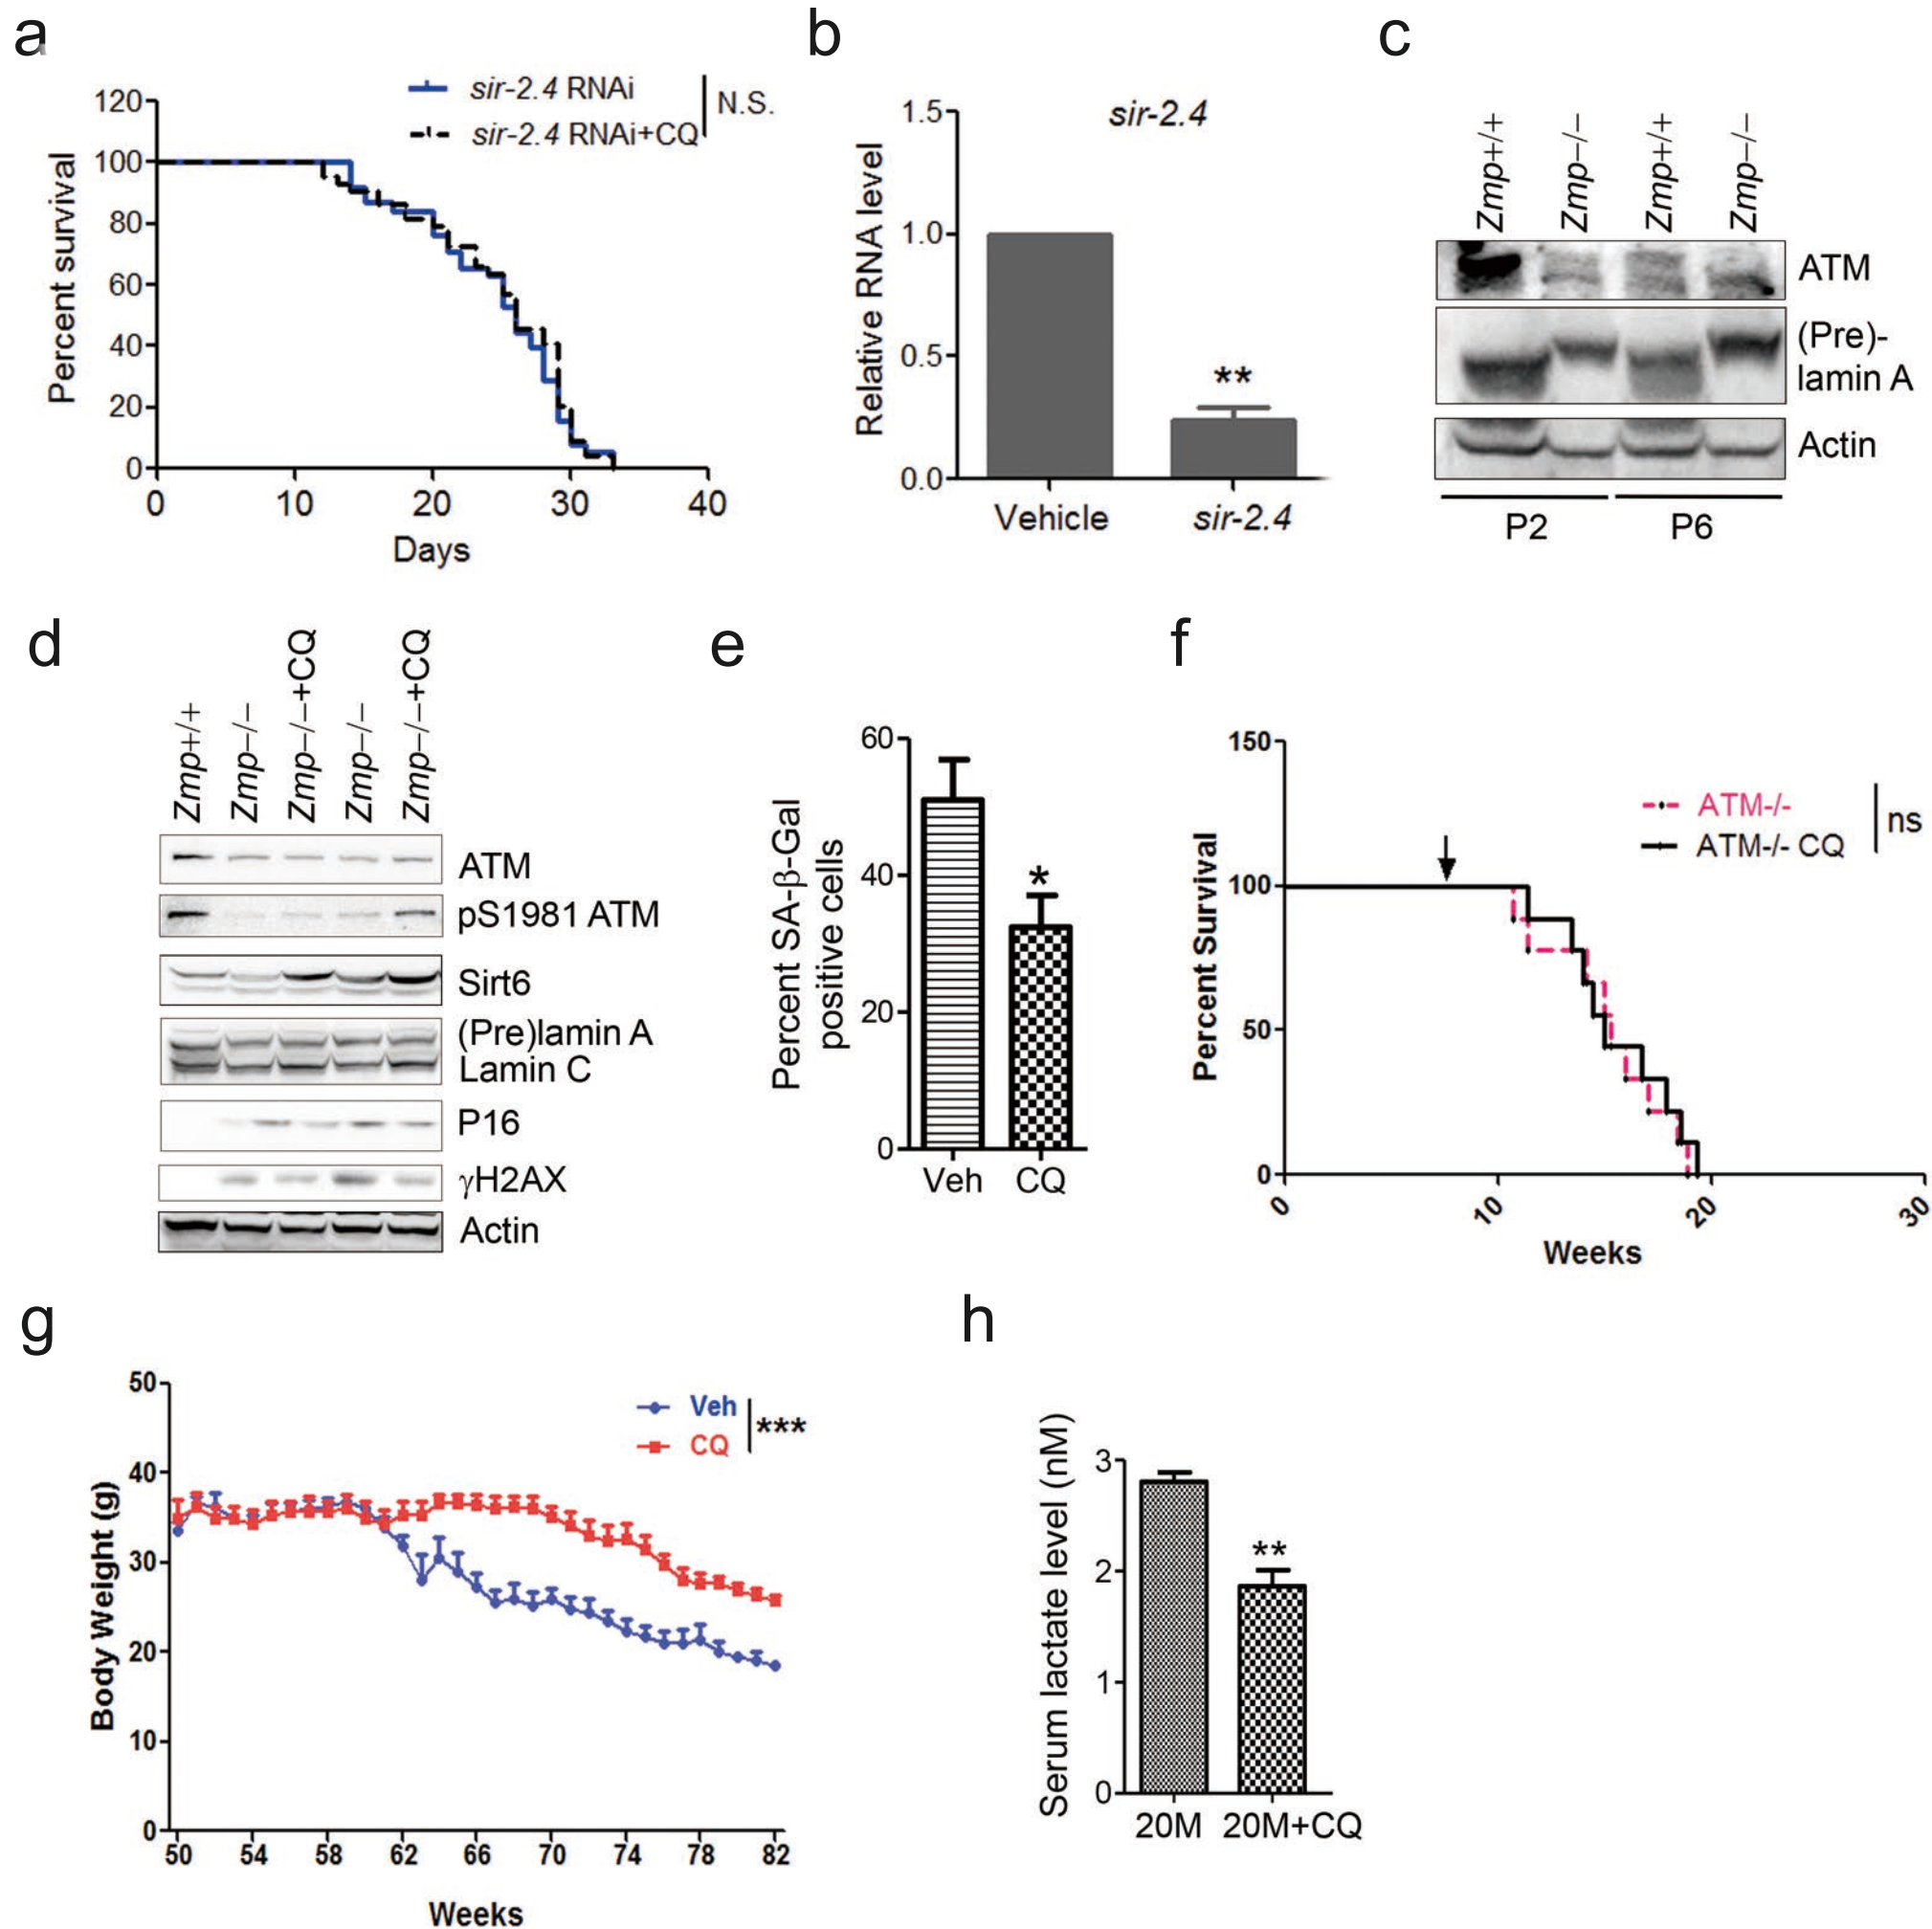

Supplement: supp [file elife-34836-supp-v1.zip › elife_poa_e34836_Figure_5_figure_supplement_1.pdf]

Figure 5-figure supplement 2

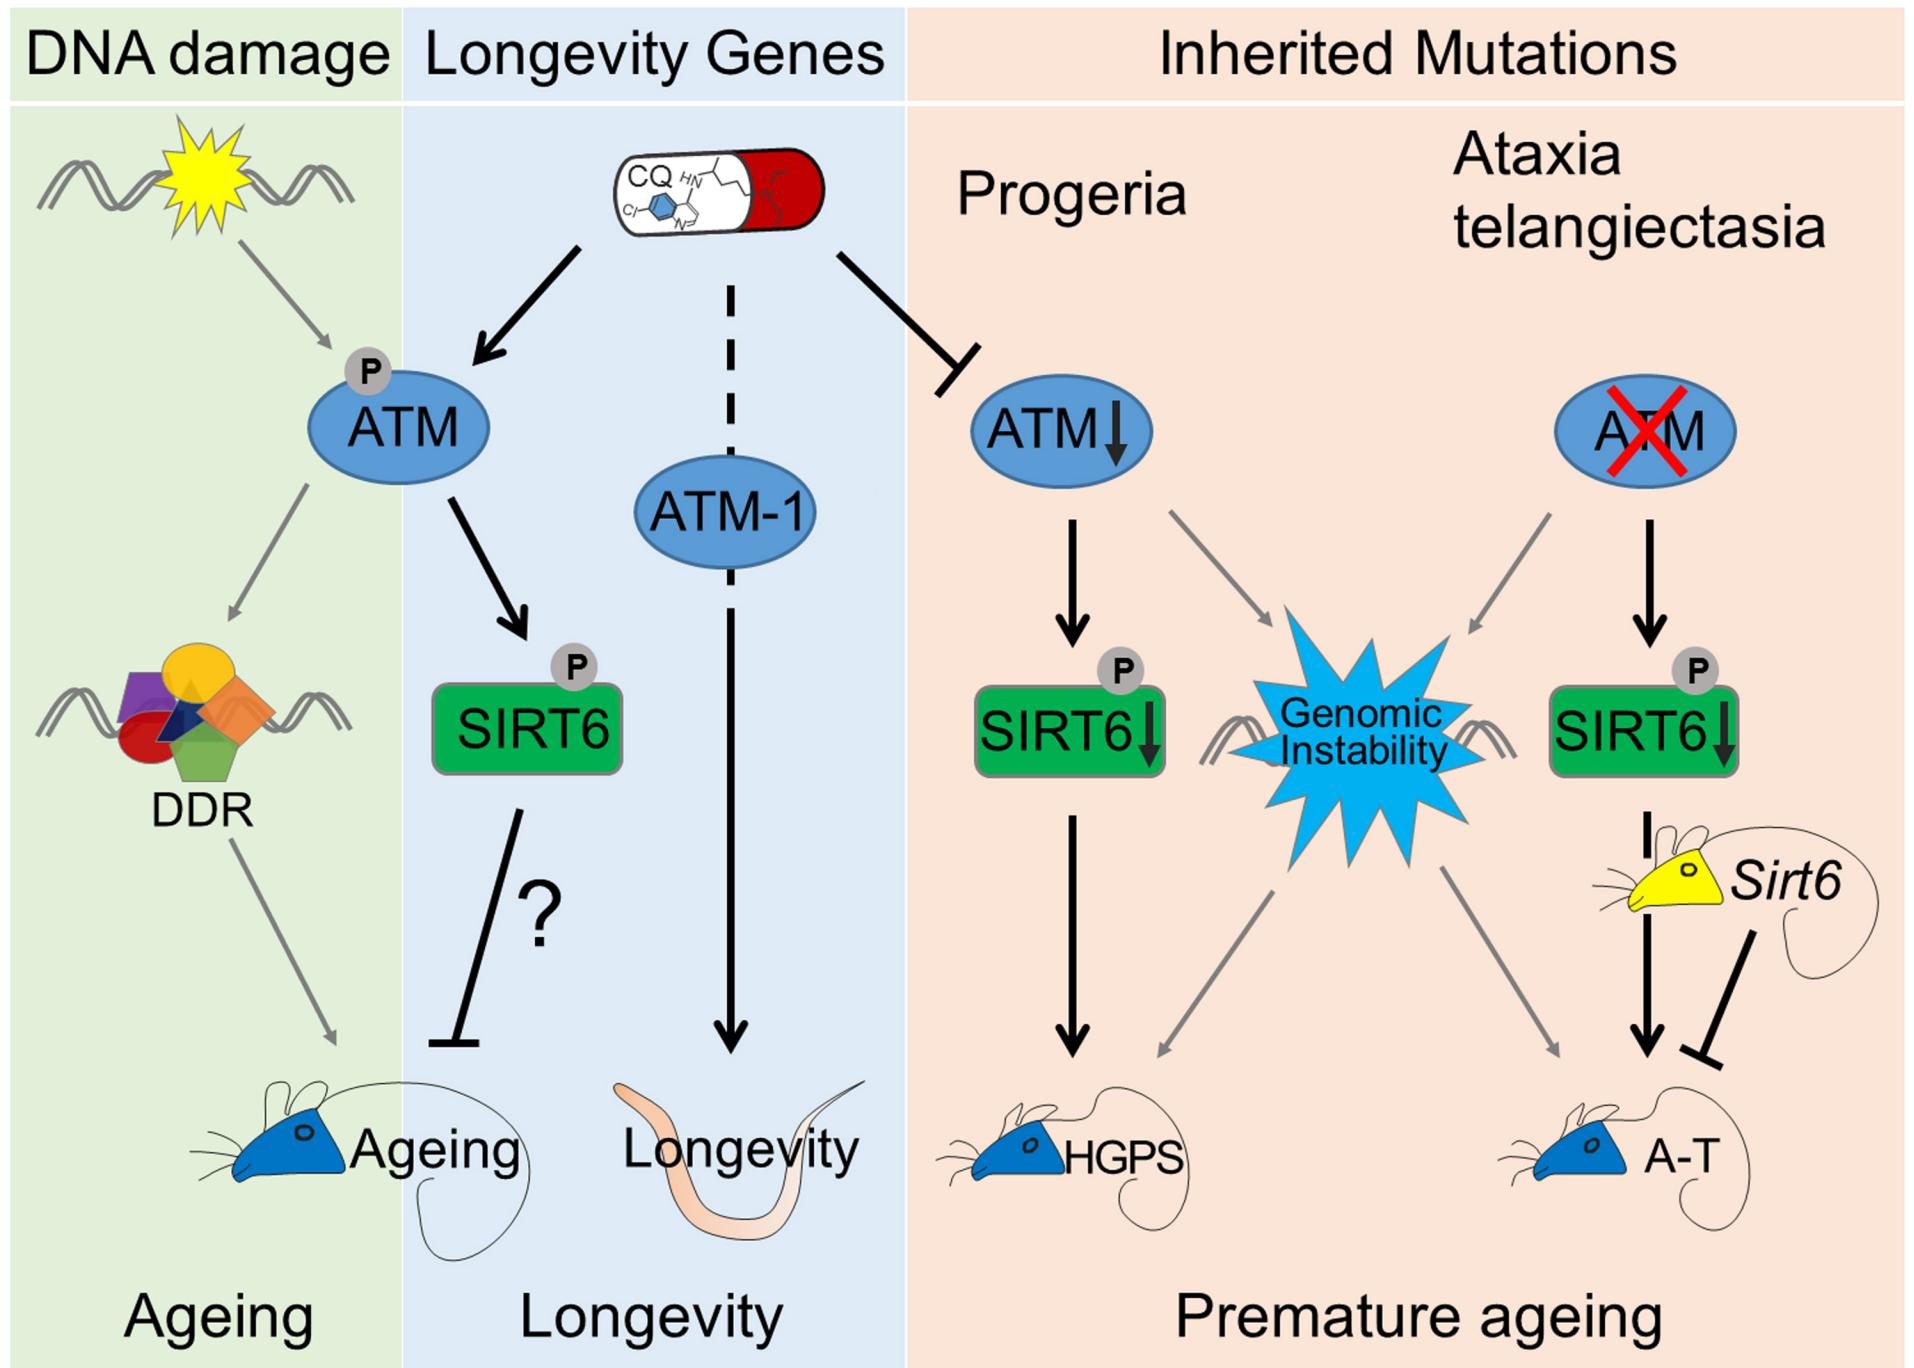

Supplement: supp [file elife-34836-supp-v1.zip › elife_poa_e34836_Figure_5_figure_supplement_2.pdf]

Figure 2-figure supplement 2

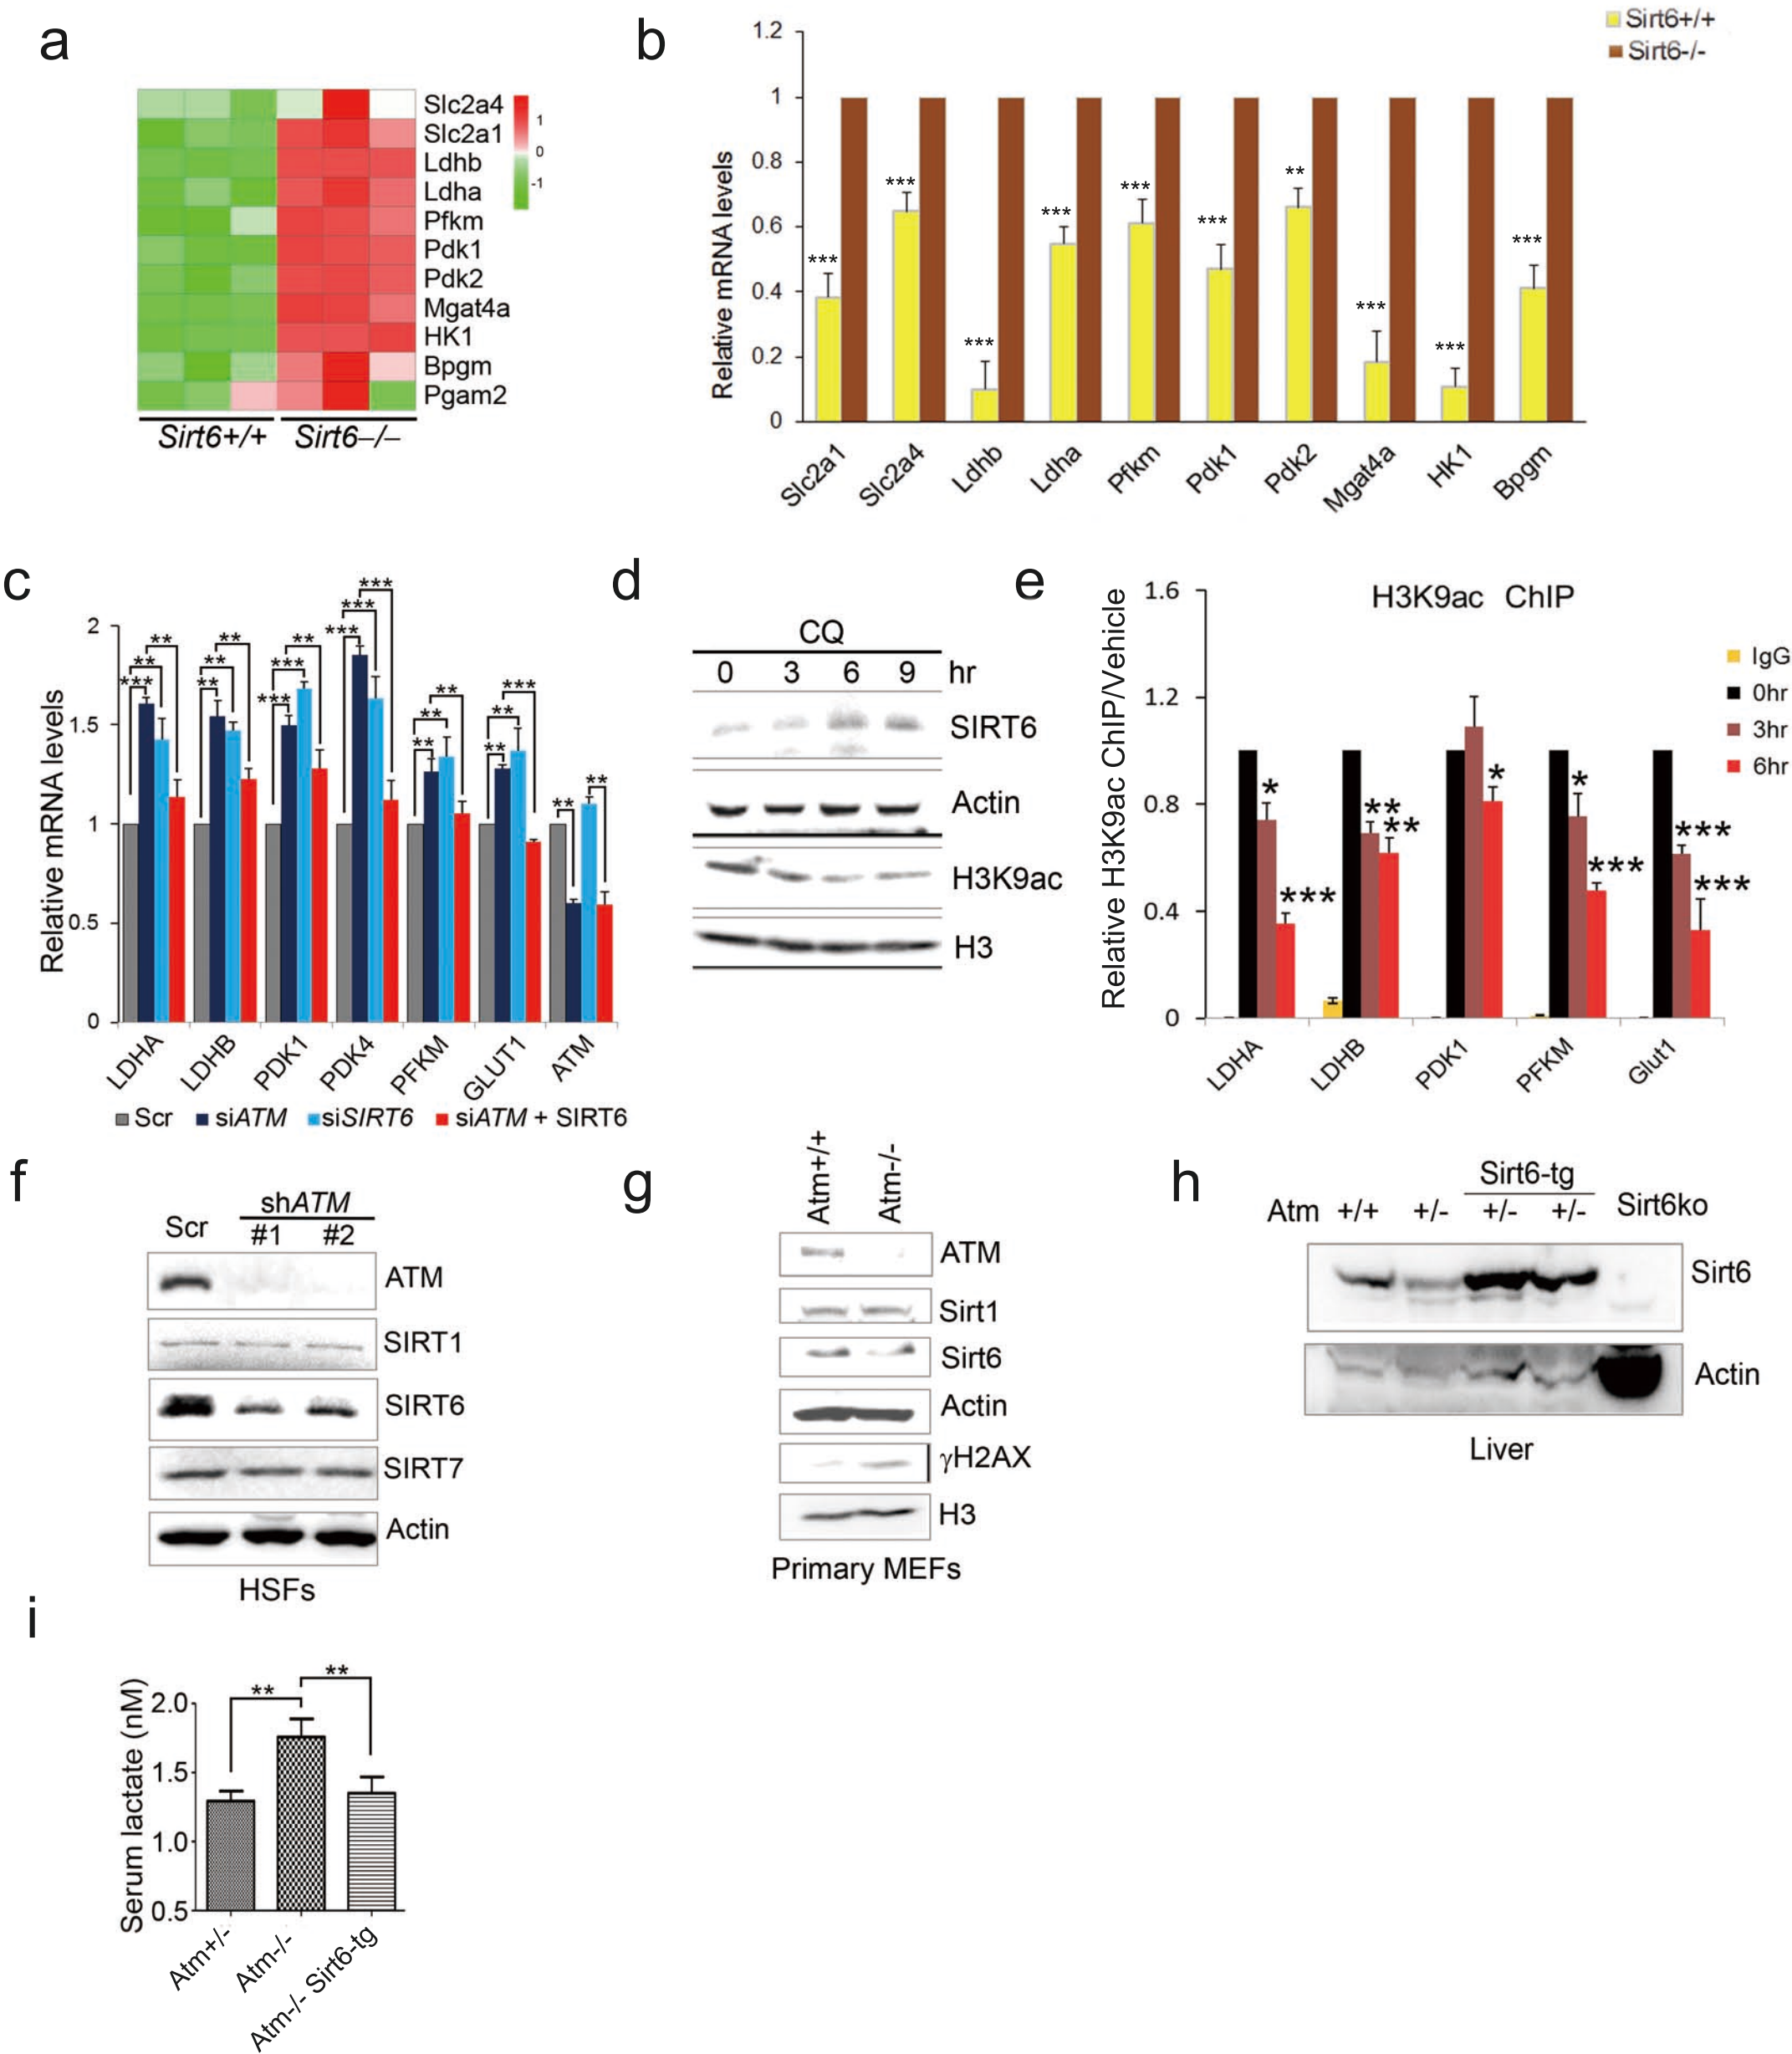

Supplement: supp [file elife-34836-supp-v1.zip › elife_poa_e34836_Figure_2_figure_supplement_2.pdf]
